# Supplementary material for: Analysis of multi-factor regulated network and different clusters in hypertrophic obstructive cardiomyopathy
Source: Research Square preprint supplement (doi:10.21203/rs.3.rs-33252/v2), 2021-03-01
Supplement: Supplementary file 1 [file 7e13fded5e641c87cbb6c05b.xlsx]

## Sheet: CandidateGene_GOBP
ID	Description	GeneRatio	BgRatio	pvalue	p.adjust	qvalue	geneID	Count
GO:0003012	muscle system process	139/1842	448/17913	1.51572e-34	8.9746e-31	6.17617e-31	ACE2/ACTA1/ACTC1/ACTN2/AGT/AGTR2/AIF1/ALDOA/ATP1A1/ATP1A2/ATP1B1/ATP2A2/ATP2B4/BMP10/CACNA1C/CACNA2D1/CACNB2/CALCRL/CALM2/CASQ1/CAV3/CKMT2/CNN1/COMP/CRYAB/CSRP3/CTNNA3/CXCR4/CYBA/DAPK3/DES/DMPK/DOCK4/DSP/EDN1/EDN2/EDNRA/ENO1/ERRFI1/F2R/FGF12/FOXO1/GAA/GATA4/GATA6/GATM/GJA1/GPD1L/GSN/HAMP/HCN4/HDAC4/HEY2/HRC/IGF1/IGFBP5/INPP5F/ITGB5/KCNA5/KCNE4/KCNIP2/KCNJ2/KCNJ8/KLF4/LEP/LMCD1/LMNA/MB/MEF2C/MIR1-…	139
GO:0006936	muscle contraction	111/1842	343/17913	1.59366e-29	4.71804e-26	3.24688e-26	ACE2/ACTA1/ACTC1/ACTN2/AGT/ALDOA/ATP1A1/ATP1A2/ATP1B1/ATP2A2/ATP2B4/BMP10/CACNA1C/CACNA2D1/CACNB2/CALCRL/CALM2/CASQ1/CAV3/CKMT2/CNN1/COMP/CRYAB/CSRP3/CTNNA3/CXCR4/DAPK3/DES/DMPK/DOCK4/DSP/EDN1/EDN2/EDNRA/ENO1/F2R/FGF12/GAA/GATA4/GJA1/GPD1L/HCN4/HDAC4/HRC/ITGB5/KCNA5/KCNE4/KCNIP2/KCNJ2/KCNJ8/MB/MIR1-1/MIR133A1/MIR133A2/MYBPC1/MYBPC2/MYBPC3/MYBPH/MYH14/MYH6/MYH7/MYL2/MYL3/MYL7/MYLK2/MYOCD/MYOT/NDUF…	111
GO:0003015	heart process	97/1842	284/17913	5.54905e-28	1.0952e-24	7.53697e-25	ACE/ACE2/ACTC1/ADRB1/AGT/AGTR2/ATP1A1/ATP1A2/ATP1A3/ATP1B1/ATP1B3/ATP2A2/ATP2B4/BMP10/CACNA1C/CACNA2D1/CACNA2D3/CACNB2/CALM2/CASQ1/CAV3/CORIN/CSRP3/CTNNA3/CXADR/CXCR4/CYP2J2/DES/DMPK/DNM1L/DSP/EDN1/EDN2/FGF12/FYN/GAA/GATA4/GJA1/GPD1L/HBEGF/HCN4/HDAC4/HEY2/HRC/HSPB7/ITPR1/ITPR3/JAK2/KCNA5/KCNE4/KCNIP2/KCNJ2/KCNJ4/KCNJ8/MIR1-1/MIR133A1/MIR133A2/MYBPC3/MYH6/MYH7/MYL2/MYL3/MYLK2/NKX2-5/NOS3/NOX4/NPPA…	97
GO:0006941	striated muscle contraction	72/1842	170/17913	1.08037e-27	1.59922e-24	1.10056e-24	ACE2/ACTC1/ALDOA/ATP1A1/ATP1A2/ATP1B1/ATP2A2/BMP10/CACNA1C/CACNA2D1/CACNB2/CALM2/CASQ1/CAV3/CSRP3/CTNNA3/CXCR4/DMPK/DSP/FGF12/GAA/GATA4/GJA1/GPD1L/HCN4/HDAC4/HRC/KCNA5/KCNE4/KCNJ2/KCNJ8/MB/MIR1-1/MIR133A1/MIR133A2/MYBPC3/MYBPH/MYH14/MYH6/MYH7/MYL2/MYL3/MYLK2/NKX2-5/NPPA/PDE4D/PDE5A/PGAM2/PIK3CA/PIK3CG/PLN/RGS2/RNF207/RYR2/SCN10A/SCN2B/SCN5A/SGCD/SLC8A1/TAZ/TCAP/TMEM38B/TNNC1/TNNI2/TNNI3/TNNI3K/TN…	72
GO:0060047	heart contraction	93/1842	275/17913	1.6589e-26	1.96447e-23	1.35191e-23	ACE/ACE2/ACTC1/ADRB1/AGT/AGTR2/ATP1A1/ATP1A2/ATP1A3/ATP1B1/ATP1B3/ATP2A2/ATP2B4/BMP10/CACNA1C/CACNA2D1/CACNA2D3/CACNB2/CALM2/CASQ1/CAV3/CORIN/CSRP3/CTNNA3/CXADR/CXCR4/CYP2J2/DES/DMPK/DNM1L/DSP/EDN1/EDN2/FGF12/GAA/GATA4/GJA1/GPD1L/HBEGF/HCN4/HDAC4/HEY2/HRC/HSPB7/ITPR1/ITPR3/JAK2/KCNA5/KCNE4/KCNIP2/KCNJ2/KCNJ4/KCNJ8/MIR1-1/MIR133A1/MIR133A2/MYBPC3/MYH6/MYH7/MYL2/MYL3/MYLK2/NKX2-5/NOS3/NPPA/PDE4D/PD…	93
GO:0060048	cardiac muscle contraction	61/1842	132/17913	3.73609e-26	3.6869e-23	2.53727e-23	ACE2/ACTC1/ATP1A1/ATP1A2/ATP1B1/BMP10/CACNA1C/CACNA2D1/CACNB2/CALM2/CAV3/CSRP3/CTNNA3/CXCR4/DSP/FGF12/GAA/GATA4/GJA1/GPD1L/HCN4/HDAC4/HRC/KCNA5/KCNE4/KCNJ2/KCNJ8/MIR1-1/MIR133A1/MIR133A2/MYBPC3/MYH6/MYH7/MYL2/MYL3/MYLK2/NKX2-5/NPPA/PDE4D/PDE5A/PIK3CA/PIK3CG/PLN/RGS2/RNF207/RYR2/SCN10A/SCN2B/SCN5A/SGCD/SLC8A1/TAZ/TCAP/TMEM38B/TNNC1/TNNI3/TNNI3K/TNNT2/TPM1/TTN/ZC3H12A	61
GO:0090257	regulation of muscle system process	81/1842	251/17913	9.28421e-22	7.85311e-19	5.40439e-19	ACE2/AGT/AIF1/ATP1A1/ATP1A2/ATP1B1/ATP2A2/ATP2B4/BMP10/CACNA1C/CALCRL/CALM2/CASQ1/CAV3/CNN1/CTNNA3/DAPK3/DMPK/DOCK4/DSP/EDN1/EDN2/ENO1/ERRFI1/F2R/FBXO32/FOXO1/GATA4/HAMP/HCN4/HDAC4/HRC/IGF1/IGFBP5/KCNJ2/KLF4/LMCD1/LMNA/MIR1-1/MIR133A1/MIR133A2/MIR20A/MLIP/MYBPC3/MYBPH/MYH7/MYL2/MYL3/MYLK2/MYOCD/NKX2-5/NOS3/NPPA/NR4A3/PDE4D/PDE5A/PIK3CG/PLCE1/PLN/RGS2/RGS4/RHOA/RNF207/RYR2/SCN10A/SCN5A/SGCA/SLC8A1…	81
GO:0008016	regulation of heart contraction	78/1842	249/17913	4.06481e-20	2.80734e-17	1.93196e-17	ACE2/ADRB1/AGT/AGTR2/ATP1A1/ATP1A2/ATP1A3/ATP1B1/ATP1B3/ATP2A2/ATP2B4/BMP10/CACNA1C/CACNA2D1/CACNA2D3/CACNB2/CALM2/CASQ1/CAV3/CORIN/CSRP3/CTNNA3/CXADR/CYP2J2/DES/DMPK/DSP/EDN1/EDN2/GAA/GATA4/GJA1/GPD1L/HBEGF/HCN4/HDAC4/HEY2/HRC/HSPB7/ITPR1/ITPR3/JAK2/KCNA5/KCNIP2/KCNJ2/KCNJ4/MIR1-1/MIR133A1/MIR133A2/MYH6/MYH7/MYL2/MYL3/NKX2-5/NOS3/NPPA/PDE4D/PDE5A/PIK3CG/PLN/POPDC2/RGS2/RGS4/RNF207/RYR2/SCN10A/SC…	78
GO:1903522	regulation of blood circulation	86/1842	292/17913	4.26719e-20	2.80734e-17	1.93196e-17	ACE/ACE2/ADRB1/AGT/AGTR1/AGTR2/AKT1/ATP1A1/ATP1A2/ATP1A3/ATP1B1/ATP1B3/ATP2A2/ATP2B4/BMP10/CACNA1C/CACNA2D1/CACNA2D3/CACNB2/CALM2/CASQ1/CAV3/CORIN/CSRP3/CTNNA3/CXADR/CYP2J2/DES/DMPK/DOCK4/DSP/EDN1/EDN2/F2R/F2RL1/GAA/GATA4/GJA1/GPD1L/HBEGF/HCN4/HDAC4/HEY2/HRC/HSPB7/ITPR1/ITPR3/JAK2/KCNA5/KCNIP2/KCNJ2/KCNJ4/LEP/MIR1-1/MIR133A1/MIR133A2/MYH6/MYH7/MYL2/MYL3/NKX2-5/NOS3/NPPA/PDE4D/PDE5A/PIK3CG/PLN/POP…	86
GO:0051146	striated muscle cell differentiation	80/1842	263/17913	1.0047e-19	5.9488e-17	4.09387e-17	ACTA1/ACTC1/ACTN2/AGT/AGTR2/AKT1/ANKRD1/BCL2/BMP10/CACYBP/CASP3/CASQ1/CAV3/CD9/COMP/CSRP3/CXADR/DMPK/DYRK1B/EDN1/EHD2/FHOD3/FLNC/GATA4/GATA6/GDF15/HAMP/HDAC4/HEY2/IGF1/IGFBP5/ITGB1/KDM6B/KLF5/KRAS/KRT8/LDB3/LMNA/LMOD2/MAML1/MEF2C/MIR1-1/MIR133A1/MIR133A2/MIR590/MSX1/MYH6/MYH9/MYL2/MYLK3/MYOCD/MYOZ2/MYPN/NEBL/NKX2-5/NOX4/NPPA/OBSCN/PDGFRA/PDGFRB/PDLIM5/PROX1/RBM24/RGS2/RGS4/SGCD/SKI/SLC8A1/SMYD1/S…	80
GO:0015980	energy derivation by oxidation of organic compounds	80/1842	264/17913	1.29998e-19	6.99744e-17	4.81553e-17	ACADVL/AGL/AKT1/ALDH5A1/BNIP3/COA6/COQ9/COX10/COX15/COX5A/COX6B1/COX8A/CYC1/CYCS/DLD/ETFB/ETFDH/FAHD1/FASTKD1/FASTKD2/FH/FXN/GAA/GFPT2/GPD2/GSK3B/IDH2/IGF1/INPP5K/LEPR/LYRM7/MDH2/ME3/MECP2/MYC/NDUFA10/NDUFA11/NDUFA12/NDUFA2/NDUFA5/NDUFAB1/NDUFAF1/NDUFAF2/NDUFB3/NDUFB5/NDUFB6/NDUFB9/NDUFC1/NDUFC2/NDUFS2/NDUFS6/NDUFS8/NDUFV1/NDUFV2/NDUFV3/NNT/NR4A3/PCDH12/PDHA1/PDHB/PHKA2/PID1/PIK3CA/PPP1R1A/PPP1R3…	80
GO:0006937	regulation of muscle contraction	60/1842	164/17913	1.81654e-19	8.31311e-17	5.72095e-17	ACE2/ATP1A1/ATP1A2/ATP1B1/ATP2A2/BMP10/CACNA1C/CALCRL/CALM2/CASQ1/CAV3/CNN1/CTNNA3/DAPK3/DMPK/DOCK4/DSP/EDN1/EDN2/ENO1/F2R/GATA4/HCN4/HDAC4/HRC/KCNJ2/MIR1-1/MIR133A1/MIR133A2/MYBPC3/MYBPH/MYH7/MYL2/MYL3/MYLK2/MYOCD/NKX2-5/NPPA/PDE4D/PDE5A/PIK3CG/PLCE1/PLN/RGS2/RHOA/RNF207/RYR2/SCN10A/SCN5A/SLC8A1/TMEM38B/TNNC1/TNNI2/TNNI3/TNNI3K/TNNT1/TNNT2/TNNT3/TPM1/ZC3H12A	60
GO:0030048	actin filament-based movement	53/1842	132/17913	1.82521e-19	8.31311e-17	5.72095e-17	ACTA1/ACTC1/ACTN2/ATP1A1/ATP1A2/CACNA1C/CACNA2D1/CACNB2/CAV3/CTNNA3/DES/DSP/FGF12/GATA4/GJA1/GPD1L/KCNA5/KCNE4/KCNJ2/KCNJ8/MIR1-1/MIR133A1/MIR133A2/MYBPC1/MYBPC2/MYBPC3/MYH14/MYH6/MYH7/MYH9/MYL2/MYL3/MYLK2/MYO1E/MYO6/PARVA/PDE4D/PLN/RNF207/RYR2/SCN2B/SCN5A/SGCD/TCAP/TNNC1/TNNI2/TNNI3/TNNT1/TNNT2/TNNT3/TPM1/TPM3/TTN	53
GO:0070252	actin-mediated cell contraction	49/1842	115/17913	2.091e-19	8.84343e-17	6.0859e-17	ACTA1/ACTC1/ACTN2/ATP1A1/ATP1A2/CACNA1C/CACNA2D1/CACNB2/CAV3/CTNNA3/DES/DSP/FGF12/GATA4/GJA1/GPD1L/KCNA5/KCNE4/KCNJ2/KCNJ8/MIR1-1/MIR133A1/MIR133A2/MYBPC1/MYBPC2/MYBPC3/MYH6/MYH7/MYL2/MYL3/MYLK2/PARVA/PDE4D/PLN/RNF207/RYR2/SCN2B/SCN5A/SGCD/TCAP/TNNC1/TNNI2/TNNI3/TNNT1/TNNT2/TNNT3/TPM1/TPM3/TTN	49
GO:0060537	muscle tissue development	102/1842	392/17913	3.03682e-19	1.19873e-16	8.24949e-17	ACTA1/ACTC1/ACTN2/ADAMTS9/AGT/AGTR2/ANKRD1/ARID2/ATF3/BCL2/BMP10/BTG2/CACYBP/CASQ1/CAV3/CSRP3/CTNNB1/CXADR/DSP/EDN1/EGR1/EP300/FHOD3/FLNB/FOS/GATA4/GATA6/GJA1/HAMP/HDAC4/HEG1/HEY2/HEYL/HLF/IGF1/IGFBP5/ITGB1/JPH2/KCNAB1/KDM6B/KLF5/LMNA/MAML1/MEF2C/MEIS1/MIR1-1/MIR590/MYBPC3/MYH14/MYH6/MYH7/MYL2/MYL3/MYLK2/MYLK3/MYOCD/MYOM1/MYOZ2/NDUFV2/NEBL/NKX2-5/NOX4/NPPA/NUPR1/OSR1/PDGFRA/PDGFRB/PDLIM5/PIM1/PKD…	102
GO:0014706	striated muscle tissue development	98/1842	376/17913	1.37196e-18	5.0771e-16	3.49398e-16	ACTA1/ACTC1/ACTN2/ADAMTS9/AGT/AGTR2/ANKRD1/ARID2/ATF3/BCL2/BMP10/BTG2/CACYBP/CASQ1/CAV3/CSRP3/CTNNB1/CXADR/DSP/EDN1/EGR1/EP300/FHOD3/FLNB/FOS/GATA4/GATA6/GJA1/HAMP/HDAC4/HEG1/HEY2/HEYL/HLF/IGF1/ITGB1/JPH2/KCNAB1/KDM6B/KLF5/LMNA/MAML1/MEF2C/MEIS1/MIR1-1/MIR590/MYBPC3/MYH14/MYH6/MYH7/MYL2/MYL3/MYLK2/MYLK3/MYOCD/MYOM1/MYOZ2/NDUFV2/NEBL/NKX2-5/NOX4/NPPA/NUPR1/PDGFRA/PDGFRB/PDLIM5/PIM1/PLN/PROX1/RBM24…	98
GO:0048738	cardiac muscle tissue development	70/1842	221/17913	1.76165e-18	6.12343e-16	4.21404e-16	ACTC1/ACTN2/ADAMTS9/AGT/AGTR2/ANKRD1/ARID2/BMP10/CACYBP/CAV3/CSRP3/CXADR/DSP/EDN1/FHOD3/GATA4/GATA6/GJA1/HAMP/HEG1/HEY2/IGF1/ITGB1/JPH2/KDM6B/LMNA/MAML1/MEF2C/MEIS1/MIR1-1/MIR590/MYBPC3/MYH6/MYH7/MYL2/MYL3/MYLK2/MYLK3/MYOCD/NDUFV2/NEBL/NKX2-5/NOX4/NPPA/PDGFRA/PDGFRB/PDLIM5/PIM1/PLN/PROX1/RGS2/RGS4/RYR2/SGCD/SLC8A1/SORBS2/TAZ/TBX5/TCAP/TGFB1/TGFB2/TGFBR3/TNNC1/TNNI3/TNNT2/TPM1/TTN/XIRP2/YAP1/ZMPST…	70
GO:0030239	myofibril assembly	31/1842	51/17913	1.86154e-18	6.12343e-16	4.21404e-16	ACTA1/ACTC1/ACTN2/ANKRD1/BMP10/CASQ1/CAV3/CSRP3/EDN1/FHOD3/ITGB1/KRT8/LDB3/LMOD2/MEF2C/MIR1-1/MYH6/MYL2/MYLK3/MYOZ2/MYPN/NEBL/NKX2-5/OBSCN/PDGFRA/PDGFRB/PROX1/SYNPO2L/TCAP/TPM1/TTN	31
GO:0045333	cellular respiration	61/1842	176/17913	2.02099e-18	6.29804e-16	4.33421e-16	ALDH5A1/BNIP3/COA6/COQ9/COX10/COX15/COX5A/COX6B1/COX8A/CYC1/CYCS/DLD/ETFB/ETFDH/FAHD1/FASTKD1/FASTKD2/FH/FXN/GPD2/IDH2/LYRM7/MDH2/ME3/MECP2/NDUFA10/NDUFA11/NDUFA12/NDUFA2/NDUFA5/NDUFAB1/NDUFAF1/NDUFAF2/NDUFB3/NDUFB5/NDUFB6/NDUFB9/NDUFC1/NDUFC2/NDUFS2/NDUFS6/NDUFS8/NDUFV1/NDUFV2/NDUFV3/NNT/NR4A3/PDHA1/PDHB/PIK3CA/SDHA/SDHD/SHMT2/SNCA/SUCLA2/SUCLG1/SURF1/TAZ/UQCRB/UQCRC1/UQCRFS1	61
GO:0006942	regulation of striated muscle contraction	43/1842	96/17913	3.38435e-18	1.00194e-15	6.89516e-16	ACE2/ATP1A1/ATP1A2/ATP1B1/ATP2A2/BMP10/CACNA1C/CALM2/CASQ1/CAV3/CTNNA3/DMPK/DSP/GATA4/HCN4/HDAC4/HRC/KCNJ2/MIR1-1/MIR133A1/MIR133A2/MYBPC3/MYBPH/MYH7/MYL2/MYL3/NKX2-5/NPPA/PDE4D/PDE5A/PIK3CG/PLN/RGS2/RNF207/RYR2/SCN10A/SCN5A/SLC8A1/TMEM38B/TNNI3/TNNI3K/TNNT3/ZC3H12A	43
GO:0055002	striated muscle cell development	54/1842	145/17913	4.65598e-18	1.31276e-15	9.03423e-16	ACTA1/ACTC1/ACTN2/AGT/AGTR2/ANKRD1/BCL2/BMP10/CASQ1/CAV3/COMP/CSRP3/CXADR/EDN1/FHOD3/FLNC/GATA4/HAMP/HDAC4/HEY2/IGF1/ITGB1/KRT8/LDB3/LMNA/LMOD2/MAML1/MEF2C/MIR1-1/MYH6/MYL2/MYLK3/MYOZ2/MYPN/NEBL/NKX2-5/NPPA/OBSCN/PDGFRA/PDGFRB/PDLIM5/PROX1/RGS2/RGS4/SGCD/SKI/SLC8A1/SORBS2/SYNPO2L/TCAP/TPM1/TTN/UCHL1/ZMPSTE24	54
GO:0055001	muscle cell development	55/1842	159/17913	1.06079e-16	2.85498e-14	1.96475e-14	ACTA1/ACTC1/ACTN2/AGT/AGTR2/ANKRD1/ATP2A2/BCL2/BMP10/CASQ1/CAV3/COMP/CSRP3/CXADR/EDN1/FHOD3/FLNC/GATA4/HAMP/HDAC4/HEY2/IGF1/ITGB1/KRT8/LDB3/LMNA/LMOD2/MAML1/MEF2C/MIR1-1/MYH6/MYL2/MYLK3/MYOZ2/MYPN/NEBL/NKX2-5/NPPA/OBSCN/PDGFRA/PDGFRB/PDLIM5/PROX1/RGS2/RGS4/SGCD/SKI/SLC8A1/SORBS2/SYNPO2L/TCAP/TPM1/TTN/UCHL1/ZMPSTE24	55
GO:0043062	extracellular structure organization	95/1842	387/17913	3.21193e-16	8.26862e-14	5.69033e-14	ACSL3/ADAM19/ADAMTS9/ADAMTSL4/AEBP1/AGRN/AGT/AGTR1/APBB2/APOA1/APOE/APP/ATP7A/ATXN1L/BCL3/BSG/CAPN1/CD44/COL12A1/COL14A1/COL16A1/COL18A1/COL4A1/COL4A2/COL5A2/COL6A2/COL6A3/COL7A1/COL8A1/COMP/CRISPLD2/CTSG/CTSK/CYP1B1/DDR1/DGAT1/EMILIN1/FAP/FBN1/FMOD/FN1/FSCN1/HAPLN1/HSPG2/HTRA1/IL6/ITGA10/ITGA5/ITGA9/ITGB1/ITGB2/ITGB4/ITGB5/JAM2/LAMA2/LAMB1/LCP1/LIPG/LOXL2/LUM/MFAP4/MMP15/MMP2/MMP3/MYO1E/NID1/OLF…	95
GO:0031032	actomyosin structure organization	55/1842	163/17913	3.70709e-16	9.14571e-14	6.29393e-14	ACTA1/ACTC1/ACTN2/ANKRD1/APOA1/ARAP1/BMP10/CASQ1/CAV3/CDC42BPB/CNN1/CNN3/CSRP3/EDN1/FHOD3/INPP5K/ITGB1/ITGB5/KRT8/LDB3/LMOD2/MEF2C/MIR1-1/MIR20A/MYH14/MYH6/MYH9/MYL2/MYLK3/MYOZ2/MYPN/NEBL/NKX2-5/NOX4/OBSCN/PDGFRA/PDGFRB/PHACTR1/PHLDB2/PPM1F/PROX1/PXN/RHOA/S100A10/SFRP1/SMAD3/SORBS1/SYNPO2L/TCAP/TGFB3/TPM1/TRPM7/TTN/WAS/ZYX	55
GO:0030198	extracellular matrix organization	86/1842	334/17913	4.04281e-16	9.57499e-14	6.58935e-14	ADAM19/ADAMTS9/ADAMTSL4/AEBP1/AGRN/AGT/APBB2/APP/ATP7A/ATXN1L/BCL3/BSG/CAPN1/CD44/COL12A1/COL14A1/COL16A1/COL18A1/COL4A1/COL4A2/COL5A2/COL6A2/COL6A3/COL7A1/COL8A1/COMP/CRISPLD2/CTSG/CTSK/CYP1B1/DDR1/EMILIN1/FAP/FBN1/FMOD/FN1/FSCN1/HAPLN1/HSPG2/HTRA1/IL6/ITGA10/ITGA5/ITGA9/ITGB1/ITGB2/ITGB4/ITGB5/JAM2/LAMA2/LAMB1/LCP1/LOXL2/LUM/MFAP4/MMP15/MMP2/MMP3/MYO1E/NID1/OLFML2A/PDGFRA/PECAM1/PHLDB1/PHLDB2/P…	86
GO:0042692	muscle cell differentiation	89/1842	359/17913	1.49575e-15	3.35788e-13	2.31084e-13	ACTA1/ACTC1/ACTN2/AGT/AGTR2/AKT1/ANKRD1/ATP2A2/BCL2/BMP10/BOC/CACYBP/CASP3/CASQ1/CAV3/CD9/COMP/CSRP3/CTNNB1/CXADR/DMPK/DYRK1B/EDN1/EHD2/FHOD3/FLNC/FOXO4/GATA4/GATA6/GDF15/HAMP/HDAC4/HEY2/IGF1/IGFBP5/ITGB1/KDM6B/KLF5/KRAS/KRT8/LDB3/LMNA/LMOD2/MAML1/MAPK12/MECP2/MEF2C/MIR1-1/MIR133A1/MIR133A2/MIR221/MIR590/MSX1/MYH6/MYH9/MYL2/MYLK3/MYOCD/MYOZ2/MYPN/NEBL/NKX2-5/NOX4/NPPA/OBSCN/PDGFRA/PDGFRB/PDLIM5/P…	89
GO:0032970	regulation of actin filament-based process	86/1842	341/17913	1.53121e-15	3.35788e-13	2.31084e-13	ACTN2/APOA1/ARAP1/ARHGAP35/ARHGDIA/ARHGDIB/ARPC1B/ARPC3/ATP1A1/ATP1A2/ATP2A2/BMP10/BST2/CACNA1C/CAV3/CCL11/CORO1A/CTNNA3/CYFIP1/DAPK3/DIXDC1/DSP/EDN1/EPHA3/F2RL1/FAM107A/FCHSD2/FES/FHOD3/FSCN1/GATA4/GSN/HCK/HCLS1/HCN4/HRAS/ID1/INPP5K/IQGAP2/KCNJ2/LMOD2/MEF2C/MIR1-1/MIR133A1/MIR133A2/MIR20A/MYBPC3/MYH9/MYLK2/MYLK3/NCK2/NOTCH2/NOX4/PDE4D/PDGFRA/PDGFRB/PHLDB2/PLEK/PLEKHG2/PLEKHH2/PLN/PPM1F/PRKCD/PRO…	86
GO:0045214	sarcomere organization	24/1842	37/17913	1.60284e-15	3.38943e-13	2.33255e-13	ACTN2/ANKRD1/BMP10/CASQ1/CAV3/EDN1/FHOD3/ITGB1/KRT8/LDB3/LMOD2/MEF2C/MIR1-1/MYH6/MYLK3/MYOZ2/MYPN/NKX2-5/OBSCN/PROX1/SYNPO2L/TCAP/TPM1/TTN	24
GO:0055007	cardiac muscle cell differentiation	45/1842	121/17913	2.95957e-15	6.04262e-13	4.15843e-13	ACTC1/ACTN2/AGT/AGTR2/BMP10/CACYBP/CAV3/CSRP3/CXADR/EDN1/FHOD3/GATA4/GATA6/HAMP/HEY2/IGF1/ITGB1/KDM6B/LMNA/MAML1/MEF2C/MIR1-1/MIR590/MYH6/MYL2/MYLK3/MYOCD/NEBL/NKX2-5/NOX4/NPPA/PDGFRA/PDGFRB/PDLIM5/PROX1/RGS2/RGS4/SGCD/SLC8A1/SORBS2/TBX5/TCAP/TGFB1/TTN/ZMPSTE24	45
GO:0014896	muscle hypertrophy	43/1842	113/17913	4.67834e-15	9.23348e-13	6.35433e-13	AGT/AGTR2/ATP2A2/ATP2B4/BMP10/CAV3/CSRP3/CYBA/EDN1/ERRFI1/FOXO1/GATA4/GATA6/HAMP/HDAC4/HEY2/IGF1/IGFBP5/INPP5F/LEP/LMCD1/LMNA/MEF2C/MIR1-1/MIR133A1/MIR133A2/MIR20A/MLIP/MYH6/MYH7/NPPA/NR4A3/PDE5A/PDLIM5/RGS2/RGS4/RYR2/SMAD3/SORBS2/TCAP/TNFRSF1A/TRIM63/TTN	43
GO:0010927	cellular component assembly involved in morphogenesis	38/1842	91/17913	5.14412e-15	9.82527e-13	6.76159e-13	ACTA1/ACTC1/ACTN2/ANKRD1/BMP10/CASQ1/CAV3/CCDC136/CD9/CSRP3/DICER1/EDN1/FHOD3/GNPAT/ITGB1/KRT8/LDB3/LMOD2/MEF2C/MIR1-1/MYH6/MYL2/MYLK3/MYOZ2/MYPN/NEBL/NKX2-5/OBSCN/PDGFRA/PDGFRB/PHLDB1/PHLDB2/PROX1/SYNPO2L/TBC1D20/TCAP/TPM1/TTN	38
GO:0009150	purine ribonucleotide metabolic process	110/1842	500/17913	5.75665e-15	1.03953e-12	7.15386e-13	ACACB/ACAT1/ACOT6/ACOT8/ACSF2/ACSL3/ACSS2/ADCY3/ADCY4/ADCY6/ADK/ADSSL1/ALDOA/ALDOC/ATP1A2/ATP1B1/ATP7A/BPGM/CHCHD10/COA6/COQ9/COX10/COX15/COX5A/COX6B1/COX8A/CYC1/DDIT4/DGAT1/DLD/DNM1L/ENO1/ENO3/FASN/FXN/GALK1/GCDH/GPI/HDAC4/HSD17B4/HSPA8/IGF1/LDHA/MCCC2/MECP2/MFN1/MLYCD/MOCS2/MPC2/MYH6/MYH7/NADK/NDUFA10/NDUFA11/NDUFA12/NDUFA2/NDUFA5/NDUFAB1/NDUFAF1/NDUFB3/NDUFB5/NDUFB6/NDUFB9/NDUFC1/NDUFC2/NDUFS2…	110
GO:0033108	mitochondrial respiratory chain complex assembly	37/1842	87/17913	5.79369e-15	1.03953e-12	7.15386e-13	AARS2/ACAD9/BCS1L/COX14/COX16/COX20/FOXRED1/LYRM7/NDUFA10/NDUFA11/NDUFA12/NDUFA2/NDUFA5/NDUFAB1/NDUFAF1/NDUFAF2/NDUFAF4/NDUFAF6/NDUFB3/NDUFB5/NDUFB6/NDUFB9/NDUFC1/NDUFC2/NDUFS2/NDUFS6/NDUFS8/NDUFV1/NDUFV2/NDUFV3/SCO1/SCO2/SURF1/TAZ/TIMM21/TIMMDC1/TMEM126B	37
GO:0035051	cardiocyte differentiation	51/1842	154/17913	1.03917e-14	1.80969e-12	1.2454e-12	ACTC1/ACTN2/AGT/AGTR2/BMP10/CACYBP/CAV3/CSRP3/CXADR/EDN1/FHOD3/GATA4/GATA6/HAMP/HEY2/IGF1/ITGB1/KDM6B/LMNA/MAML1/MEF2C/MIR1-1/MIR133A1/MIR133A2/MIR590/MYH6/MYL2/MYLK3/MYOCD/NEBL/NKX2-5/NOX4/NPPA/PDGFRA/PDGFRB/PDLIM5/PRICKLE1/PROX1/RGS2/RGS4/SGCD/SLC8A1/SORBS2/SOX18/TBX5/TCAP/TGFB1/TGFB2/TGFBR3/TTN/ZMPSTE24	51
GO:0022900	electron transport chain	55/1842	175/17913	1.18815e-14	1.96271e-12	1.35071e-12	ALDH2/ALDH5A1/COA6/COQ9/COX10/COX15/COX5A/COX6B1/COX8A/CYB5A/CYBA/CYBB/CYC1/DLD/ETFB/ETFDH/FDX1/GPD2/HAAO/LOXL2/MAOB/MECP2/NDUFA10/NDUFA11/NDUFA12/NDUFA2/NDUFA4L2/NDUFA5/NDUFAB1/NDUFAF1/NDUFAF2/NDUFB3/NDUFB5/NDUFB6/NDUFB9/NDUFC1/NDUFC2/NDUFS2/NDUFS6/NDUFS8/NDUFV1/NDUFV2/NDUFV3/NOX4/PHGDH/QDPR/SDHA/SH3BGRL3/SNCA/SURF1/TAZ/TXNRD1/UQCRB/UQCRC1/UQCRFS1	55
GO:0007005	mitochondrion organization	104/1842	466/17913	1.20801e-14	1.96271e-12	1.35071e-12	AARS2/ACAA2/ACAD9/AGK/AGTPBP1/AKT1/ALAS1/APOO/ATG13/ATG3/ATP13A2/ATP7A/BAG3/BCL2/BCS1L/BNIP3/CAMK2A/CAMKK2/CCAR2/CHCHD10/COX10/COX14/COX16/COX20/CTSK/CXADR/CYCS/DNAJC19/DNM1L/FBXW7/FOXRED1/FXN/GSK3B/HIGD1A/HSD17B10/HTT/IFIT2/IGF1/JUN/LMNA/LONP1/LYRM7/MAN2A1/MFF/MFN1/MFN2/MIR29A/MLLT11/MYH14/NDUFA10/NDUFA11/NDUFA12/NDUFA2/NDUFA5/NDUFAB1/NDUFAF1/NDUFAF2/NDUFAF4/NDUFAF6/NDUFB3/NDUFB5/NDUFB6/NDUFB9/N…	104
GO:0014897	striated muscle hypertrophy	42/1842	111/17913	1.22649e-14	1.96271e-12	1.35071e-12	AGT/AGTR2/ATP2A2/ATP2B4/BMP10/CAV3/CSRP3/EDN1/ERRFI1/FOXO1/GATA4/GATA6/HAMP/HDAC4/HEY2/IGF1/IGFBP5/INPP5F/LEP/LMCD1/LMNA/MEF2C/MIR1-1/MIR133A1/MIR133A2/MIR20A/MLIP/MYH6/MYH7/NPPA/NR4A3/PDE5A/PDLIM5/RGS2/RGS4/RYR2/SMAD3/SORBS2/TCAP/TNFRSF1A/TRIM63/TTN	42
GO:0043500	muscle adaptation	44/1842	121/17913	1.55124e-14	2.41707e-12	1.66339e-12	ACTA1/AGT/AIF1/ATP2A2/ATP2B4/BMP10/CAV3/CYBA/EDN1/ERRFI1/FOXO1/GATA6/GATM/GSN/HAMP/HDAC4/HEY2/IGF1/IGFBP5/INPP5F/KLF4/LMCD1/LMNA/MEF2C/MIR1-1/MIR133A1/MIR133A2/MIR20A/MLIP/MYH6/MYH7/MYOZ2/NOS3/NPPA/NR4A3/PDE5A/RGS2/RGS4/SMAD3/TCAP/TNFRSF1A/TNNC1/TNNT1/TRIM63	44
GO:0055117	regulation of cardiac muscle contraction	35/1842	81/17913	1.7433e-14	2.64669e-12	1.82141e-12	ACE2/ATP1A1/ATP1A2/ATP1B1/ATP2A2/BMP10/CACNA1C/CALM2/CAV3/CTNNA3/DSP/GATA4/HCN4/HDAC4/HRC/KCNJ2/MIR1-1/MIR133A1/MIR133A2/NKX2-5/NPPA/PDE4D/PDE5A/PIK3CG/PLN/RGS2/RNF207/RYR2/SCN10A/SCN5A/SLC8A1/TMEM38B/TNNI3/TNNI3K/ZC3H12A	35
GO:0003300	cardiac muscle hypertrophy	41/1842	108/17913	2.21926e-14	3.28507e-12	2.26073e-12	AGT/AGTR2/ATP2A2/ATP2B4/BMP10/CAV3/CSRP3/EDN1/ERRFI1/FOXO1/GATA4/GATA6/HAMP/HDAC4/HEY2/IGF1/INPP5F/LEP/LMCD1/LMNA/MEF2C/MIR1-1/MIR133A1/MIR133A2/MIR20A/MLIP/MYH6/MYH7/NPPA/NR4A3/PDE5A/PDLIM5/RGS2/RGS4/RYR2/SMAD3/SORBS2/TCAP/TNFRSF1A/TRIM63/TTN	41
GO:0055013	cardiac muscle cell development	34/1842	78/17913	3.00561e-14	4.34054e-12	2.98709e-12	ACTC1/ACTN2/AGT/AGTR2/BMP10/CAV3/CSRP3/CXADR/EDN1/FHOD3/GATA4/HAMP/HEY2/IGF1/LMNA/MAML1/MYH6/MYL2/MYLK3/NEBL/NKX2-5/NPPA/PDGFRA/PDGFRB/PDLIM5/PROX1/RGS2/RGS4/SGCD/SLC8A1/SORBS2/TCAP/TTN/ZMPSTE24	34
GO:0022904	respiratory electron transport chain	40/1842	106/17913	5.81148e-14	8.1928e-12	5.63815e-12	ALDH5A1/COA6/COQ9/COX10/COX15/COX5A/COX6B1/COX8A/CYC1/DLD/ETFB/ETFDH/GPD2/MECP2/NDUFA10/NDUFA11/NDUFA12/NDUFA2/NDUFA5/NDUFAB1/NDUFAF1/NDUFAF2/NDUFB3/NDUFB5/NDUFB6/NDUFB9/NDUFC1/NDUFC2/NDUFS2/NDUFS6/NDUFS8/NDUFV1/NDUFV2/NDUFV3/SDHA/SNCA/TAZ/UQCRB/UQCRC1/UQCRFS1	40
GO:0055006	cardiac cell development	35/1842	84/17913	6.61498e-14	9.10867e-12	6.26844e-12	ACTC1/ACTN2/AGT/AGTR2/BMP10/CAV3/CSRP3/CXADR/EDN1/FHOD3/GATA4/HAMP/HEY2/IGF1/LMNA/MAML1/MYH6/MYL2/MYLK3/NEBL/NKX2-5/NPPA/PDGFRA/PDGFRB/PDLIM5/PROX1/RGS2/RGS4/SGCD/SLC8A1/SORBS2/TCAP/TGFBR3/TTN/ZMPSTE24	35
GO:0007517	muscle organ development	92/1842	403/17913	1.04321e-13	1.40383e-11	9.66092e-12	ACTA1/ACTC1/ANKRD1/ARID5B/ATF3/BCL2/BMP10/BTG2/CASQ1/CAV3/COL6A3/CRYAB/CSRP3/CTNNB1/DSP/EDN1/EGR1/EP300/FHL1/FLNB/FOS/FOXO4/FZD2/GATA6/GJA1/HAMP/HBEGF/HDAC4/HEG1/HEY2/HEYL/HLF/ID3/IGF1/ITGB1BP2/JPH2/KCNAB1/KLF5/LAMA2/MAPK12/MEF2C/MEIS1/MIR1-1/MIR590/MRAS/MSX1/MYBPC3/MYH14/MYH6/MYH7/MYL2/MYL3/MYLK2/MYOCD/MYOM1/MYOZ2/NKX2-5/NUPR1/PIM1/PROX1/RBM24/RGS2/RGS4/RHOA/RYR2/SGCA/SGCD/SGCG/SKI/SMAD3/SMYD1/S…	92
GO:0009199	ribonucleoside triphosphate metabolic process	78/1842	319/17913	1.8844e-13	2.47945e-11	1.70631e-11	ALDOA/ALDOC/ATP1A2/ATP1B1/ATP7A/BPGM/CHCHD10/COA6/COQ9/COX10/COX15/COX5A/COX6B1/COX8A/CYC1/DDIT4/DLD/DNM1L/ENO1/ENO3/FXN/GALK1/GPI/HDAC4/HSPA8/IGF1/LDHA/MECP2/MFN1/MOCS2/MYH6/MYH7/NADK/NDUFA10/NDUFA11/NDUFA12/NDUFA2/NDUFA5/NDUFAB1/NDUFAF1/NDUFB3/NDUFB5/NDUFB6/NDUFB9/NDUFC1/NDUFC2/NDUFS2/NDUFS6/NDUFS8/NDUFV1/NDUFV2/NDUFV3/NME1/NUP188/NUP214/NUPR1/OLA1/OPA1/PFKL/PFKM/PGAM2/PID1/POM121C/PRKAG2/RHOA/…	78
GO:0009205	purine ribonucleoside triphosphate metabolic process	76/1842	314/17913	6.71453e-13	8.57804e-11	5.90327e-11	ALDOA/ALDOC/ATP1A2/ATP1B1/ATP7A/BPGM/CHCHD10/COA6/COQ9/COX10/COX15/COX5A/COX6B1/COX8A/CYC1/DDIT4/DLD/DNM1L/ENO1/ENO3/FXN/GALK1/GPI/HDAC4/HSPA8/IGF1/LDHA/MECP2/MFN1/MOCS2/MYH6/MYH7/NADK/NDUFA10/NDUFA11/NDUFA12/NDUFA2/NDUFA5/NDUFAB1/NDUFAF1/NDUFB3/NDUFB5/NDUFB6/NDUFB9/NDUFC1/NDUFC2/NDUFS2/NDUFS6/NDUFS8/NDUFV1/NDUFV2/NDUFV3/NME1/NUP188/NUP214/NUPR1/OLA1/OPA1/PFKL/PFKM/PGAM2/PID1/POM121C/PRKAG2/RHOA/…	76
GO:0010257	NADH dehydrogenase complex assembly	29/1842	64/17913	6.954e-13	8.57804e-11	5.90327e-11	ACAD9/BCS1L/FOXRED1/NDUFA10/NDUFA11/NDUFA12/NDUFA2/NDUFA5/NDUFAB1/NDUFAF1/NDUFAF2/NDUFAF4/NDUFAF6/NDUFB3/NDUFB5/NDUFB6/NDUFB9/NDUFC1/NDUFC2/NDUFS2/NDUFS6/NDUFS8/NDUFV1/NDUFV2/NDUFV3/TAZ/TIMM21/TIMMDC1/TMEM126B	29
GO:0032981	mitochondrial respiratory chain complex I assembly	29/1842	64/17913	6.954e-13	8.57804e-11	5.90327e-11	ACAD9/BCS1L/FOXRED1/NDUFA10/NDUFA11/NDUFA12/NDUFA2/NDUFA5/NDUFAB1/NDUFAF1/NDUFAF2/NDUFAF4/NDUFAF6/NDUFB3/NDUFB5/NDUFB6/NDUFB9/NDUFC1/NDUFC2/NDUFS2/NDUFS6/NDUFS8/NDUFV1/NDUFV2/NDUFV3/TAZ/TIMM21/TIMMDC1/TMEM126B	29
GO:0009144	purine nucleoside triphosphate metabolic process	77/1842	321/17913	7.74029e-13	9.35312e-11	6.43666e-11	ADK/ALDOA/ALDOC/ATP1A2/ATP1B1/ATP7A/BPGM/CHCHD10/COA6/COQ9/COX10/COX15/COX5A/COX6B1/COX8A/CYC1/DDIT4/DLD/DNM1L/ENO1/ENO3/FXN/GALK1/GPI/HDAC4/HSPA8/IGF1/LDHA/MECP2/MFN1/MOCS2/MYH6/MYH7/NADK/NDUFA10/NDUFA11/NDUFA12/NDUFA2/NDUFA5/NDUFAB1/NDUFAF1/NDUFB3/NDUFB5/NDUFB6/NDUFB9/NDUFC1/NDUFC2/NDUFS2/NDUFS6/NDUFS8/NDUFV1/NDUFV2/NDUFV3/NME1/NUP188/NUP214/NUPR1/OLA1/OPA1/PFKL/PFKM/PGAM2/PID1/POM121C/PRKAG2/R…	77
GO:0046034	ATP metabolic process	71/1842	287/17913	1.26036e-12	1.49252e-10	1.02713e-10	ALDOA/ALDOC/ATP1A2/ATP1B1/ATP7A/BPGM/CHCHD10/COA6/COQ9/COX10/COX15/COX5A/COX6B1/COX8A/CYC1/DDIT4/DLD/DNM1L/ENO1/ENO3/FXN/GALK1/GPI/HDAC4/HSPA8/IGF1/LDHA/MECP2/MYH6/MYH7/NADK/NDUFA10/NDUFA11/NDUFA12/NDUFA2/NDUFA5/NDUFAB1/NDUFAF1/NDUFB3/NDUFB5/NDUFB6/NDUFB9/NDUFC1/NDUFC2/NDUFS2/NDUFS6/NDUFS8/NDUFV1/NDUFV2/NDUFV3/NUP188/NUP214/NUPR1/OLA1/PFKL/PFKM/PGAM2/PID1/POM121C/PRKAG2/RHOA/SHMT2/SNCA/STAT3/SURF…	71
GO:0009141	nucleoside triphosphate metabolic process	79/1842	337/17913	1.3951e-12	1.61968e-10	1.11464e-10	ADK/ALDOA/ALDOC/ATP1A2/ATP1B1/ATP7A/BPGM/CHCHD10/COA6/COQ9/COX10/COX15/COX5A/COX6B1/COX8A/CYC1/DDIT4/DLD/DNM1L/ENO1/ENO3/FXN/GALK1/GPI/HDAC4/HSPA8/IGF1/LDHA/MECP2/MFN1/MOCS2/MYH6/MYH7/NADK/NDUFA10/NDUFA11/NDUFA12/NDUFA2/NDUFA5/NDUFAB1/NDUFAF1/NDUFB3/NDUFB5/NDUFB6/NDUFB9/NDUFC1/NDUFC2/NDUFS2/NDUFS6/NDUFS8/NDUFV1/NDUFV2/NDUFV3/NME1/NUP188/NUP214/NUPR1/OLA1/OPA1/PFKL/PFKM/PGAM2/PID1/POM121C/PRKAG2/R…	79
GO:0030049	muscle filament sliding	22/1842	39/17913	1.48104e-12	1.65457e-10	1.13865e-10	ACTA1/ACTC1/ACTN2/DES/MYBPC1/MYBPC2/MYBPC3/MYH6/MYH7/MYL2/MYL3/MYLK2/TCAP/TNNC1/TNNI2/TNNI3/TNNT1/TNNT2/TNNT3/TPM1/TPM3/TTN	22
GO:0033275	actin-myosin filament sliding	22/1842	39/17913	1.48104e-12	1.65457e-10	1.13865e-10	ACTA1/ACTC1/ACTN2/DES/MYBPC1/MYBPC2/MYBPC3/MYH6/MYH7/MYL2/MYL3/MYLK2/TCAP/TNNC1/TNNI2/TNNI3/TNNT1/TNNT2/TNNT3/TPM1/TPM3/TTN	22
GO:0009161	ribonucleoside monophosphate metabolic process	77/1842	331/17913	4.04818e-12	4.43876e-10	3.05468e-10	ADK/ADSSL1/ALDOA/ALDOC/ATP1A2/ATP1B1/ATP7A/BPGM/CHCHD10/COA6/COQ9/COX10/COX15/COX5A/COX6B1/COX8A/CYC1/DDIT4/DLD/DNM1L/ENO1/ENO3/FXN/GALK1/GPI/HDAC4/HSPA8/IGF1/LDHA/MECP2/MYH6/MYH7/NADK/NDUFA10/NDUFA11/NDUFA12/NDUFA2/NDUFA5/NDUFAB1/NDUFAF1/NDUFB3/NDUFB5/NDUFB6/NDUFB9/NDUFC1/NDUFC2/NDUFS2/NDUFS6/NDUFS8/NDUFV1/NDUFV2/NDUFV3/NUDT9/NUP188/NUP214/NUPR1/OLA1/PFKL/PFKM/PGAM2/PID1/POM121C/PRKAG2/RFK/RHOA/…	77
GO:0042773	ATP synthesis coupled electron transport	34/1842	90/17913	4.27667e-12	4.60403e-10	3.16842e-10	COA6/COQ9/COX10/COX15/COX5A/COX6B1/COX8A/CYC1/DLD/MECP2/NDUFA10/NDUFA11/NDUFA12/NDUFA2/NDUFA5/NDUFAB1/NDUFAF1/NDUFB3/NDUFB5/NDUFB6/NDUFB9/NDUFC1/NDUFC2/NDUFS2/NDUFS6/NDUFS8/NDUFV1/NDUFV2/NDUFV3/SNCA/TAZ/UQCRB/UQCRC1/UQCRFS1	34
GO:0009167	purine ribonucleoside monophosphate metabolic process	74/1842	317/17913	8.90228e-12	9.41257e-10	6.47758e-10	ADK/ADSSL1/ALDOA/ALDOC/ATP1A2/ATP1B1/ATP7A/BPGM/CHCHD10/COA6/COQ9/COX10/COX15/COX5A/COX6B1/COX8A/CYC1/DDIT4/DLD/DNM1L/ENO1/ENO3/FXN/GALK1/GPI/HDAC4/HSPA8/IGF1/LDHA/MECP2/MYH6/MYH7/NADK/NDUFA10/NDUFA11/NDUFA12/NDUFA2/NDUFA5/NDUFAB1/NDUFAF1/NDUFB3/NDUFB5/NDUFB6/NDUFB9/NDUFC1/NDUFC2/NDUFS2/NDUFS6/NDUFS8/NDUFV1/NDUFV2/NDUFV3/NUDT9/NUP188/NUP214/NUPR1/OLA1/PFKL/PFKM/PGAM2/PID1/POM121C/PRKAG2/RHOA/SHMT…	74
GO:0086001	cardiac muscle cell action potential	30/1842	74/17913	9.40631e-12	9.77101e-10	6.72426e-10	ATP1A1/ATP1A2/ATP1B1/ATP2A2/CACNA1C/CACNA2D1/CACNB2/CAV3/CTNNA3/CXADR/DSP/FGF12/GJA1/GPD1L/HCN4/KCNA5/KCNE4/KCNIP2/KCNJ2/KCNJ8/MIR1-1/MIR133A1/MIR133A2/RNF207/RYR2/SCN10A/SCN2B/SCN5A/SLC8A1/SLMAP	30
GO:0009126	purine nucleoside monophosphate metabolic process	74/1842	318/17913	1.04605e-11	1.06787e-09	7.34893e-10	ADK/ADSSL1/ALDOA/ALDOC/ATP1A2/ATP1B1/ATP7A/BPGM/CHCHD10/COA6/COQ9/COX10/COX15/COX5A/COX6B1/COX8A/CYC1/DDIT4/DLD/DNM1L/ENO1/ENO3/FXN/GALK1/GPI/HDAC4/HSPA8/IGF1/LDHA/MECP2/MYH6/MYH7/NADK/NDUFA10/NDUFA11/NDUFA12/NDUFA2/NDUFA5/NDUFAB1/NDUFAF1/NDUFB3/NDUFB5/NDUFB6/NDUFB9/NDUFC1/NDUFC2/NDUFS2/NDUFS6/NDUFS8/NDUFV1/NDUFV2/NDUFV3/NUDT9/NUP188/NUP214/NUPR1/OLA1/PFKL/PFKM/PGAM2/PID1/POM121C/PRKAG2/RHOA/SHMT…	74
GO:0042775	mitochondrial ATP synthesis coupled electron transport	33/1842	89/17913	1.60215e-11	1.60785e-09	1.1065e-09	COQ9/COX10/COX15/COX5A/COX6B1/COX8A/CYC1/DLD/MECP2/NDUFA10/NDUFA11/NDUFA12/NDUFA2/NDUFA5/NDUFAB1/NDUFAF1/NDUFB3/NDUFB5/NDUFB6/NDUFB9/NDUFC1/NDUFC2/NDUFS2/NDUFS6/NDUFS8/NDUFV1/NDUFV2/NDUFV3/SNCA/TAZ/UQCRB/UQCRC1/UQCRFS1	33
GO:0042326	negative regulation of phosphorylation	94/1842	455/17913	2.48788e-11	2.45512e-09	1.68957e-09	AJUBA/AKT1/APOE/ATF3/CALM2/CASP3/CAV3/CDKN1A/CDKN1C/CTDSP2/CYLD/DBNDD2/DDIT4/DTNBP1/DUSP1/DUSP16/DUSP26/EMILIN1/ERRFI1/F2RL1/FOXO1/GADD45A/GADD45B/GNAQ/GPD1L/HDAC3/HDAC4/HEG1/HYAL2/IGF1R/IGFBP3/IMPACT/INPP5F/INPP5K/IPO5/IRAK3/JUN/KLF4/KLHL31/LRP5/LRRK1/LYN/MIDN/MIR133A1/MIR133A2/MIR20A/MIR221/MVP/MYC/MYOCD/NCK2/NNT/NUPR1/PDE4D/PID1/PIK3IP1/PPM1F/PPP2CA/PPP2R5A/PRKAG2/PRKCD/PTPN1/PTPRR/RAPGEF1/RGN…	94
GO:0035994	response to muscle stretch	14/1842	18/17913	2.89877e-11	2.81371e-09	1.93635e-09	ANKRD1/CAV3/CSRP3/EDN1/FOS/JUN/NFKBIA/NPPA/RAF1/RELA/RYR2/SLC8A1/TCAP/TTN	14
GO:0006119	oxidative phosphorylation	41/1842	131/17913	3.23297e-11	3.08748e-09	2.12476e-09	ATP7A/CHCHD10/COA6/COQ9/COX10/COX15/COX5A/COX6B1/COX8A/CYC1/DLD/FXN/MECP2/NDUFA10/NDUFA11/NDUFA12/NDUFA2/NDUFA5/NDUFAB1/NDUFAF1/NDUFB3/NDUFB5/NDUFB6/NDUFB9/NDUFC1/NDUFC2/NDUFS2/NDUFS6/NDUFS8/NDUFV1/NDUFV2/NDUFV3/NUPR1/RHOA/SHMT2/SNCA/SURF1/TAZ/UQCRB/UQCRC1/UQCRFS1	41
GO:0043502	regulation of muscle adaptation	36/1842	106/17913	3.72672e-11	3.45187e-09	2.37552e-09	AGT/AIF1/ATP2A2/ATP2B4/BMP10/CASQ1/CAV3/EDN1/ERRFI1/FBXO32/FOXO1/HAMP/HDAC4/IGF1/IGFBP5/KLF4/LMCD1/LMNA/MIR1-1/MIR133A1/MIR133A2/MIR20A/MLIP/MYH7/NOS3/NR4A3/PDE5A/RGS2/RGS4/SCN5A/SGCA/SMAD3/TNFRSF1A/TNNC1/TNNT1/TRIM63	36
GO:0007264	small GTPase mediated signal transduction	95/1842	465/17913	3.73112e-11	3.45187e-09	2.37552e-09	AGTR1/AIF1/APOA1/APOE/ARAP1/ARHGAP1/ARHGAP24/ARHGAP35/ARHGDIA/ARHGDIB/ARHGEF12/ARHGEF17/ARHGEF18/ARHGEF2/ARHGEF28/ARHGEF9/AUTS2/BCL6/CBL/CDKN1A/CHN1/CYFIP1/CYTH2/CYTH3/DIRAS3/DNMBP/DOCK1/DOCK2/DOCK4/ECT2L/ELMO1/F2R/F2RL1/FAM13B/FARP1/FGD2/FGD5/GARNL3/HEG1/HRAS/IGF1/ITGB1/JAK2/JUN/KALRN/KANK2/KRAS/LYN/LZTR1/MAP4K4/MAPRE2/MFN2/MRAS/NOTCH2/NRAS/OBSCN/PDGFRB/PECAM1/PLCE1/PLEKHG2/PLK2/PREX2/RAC2/RAF1/…	95
GO:0010959	regulation of metal ion transport	80/1842	365/17913	3.79948e-11	3.46103e-09	2.38183e-09	ACTN2/AGT/AHNAK/AKT1/ATP1A1/ATP1A2/ATP1B1/ATP1B3/ATP2B4/ATP7A/BCL2/CACNA1C/CACNA2D1/CACNB2/CALM2/CAMK2A/CASQ1/CAV3/CCL2/CORO1A/CTNNB1/CXCR4/CYBA/DIAPH1/DMPK/EGF/F2R/FGF12/FHL1/FMR1/FYN/GJA1/GPD1L/HRC/HSPA2/HTT/INPP5K/JPH2/KCNA5/KCNAB1/KCNIP2/KCNJ2/KLHL24/LGALS3/LILRA5/LYN/MIR1-1/MIR133A1/MIR133A2/MLLT6/NKX2-5/NOS3/NPPA/OSR1/PDE4D/PDGFRB/PIK3CG/PKD2/PLN/PTPN3/RGN/RGS4/RHOA/RNF207/RYR2/SCN2B/SCN5A/…	80
GO:0071900	regulation of protein serine/threonine kinase activity	97/1842	479/17913	3.89265e-11	3.49218e-09	2.40326e-09	ACTB/AJUBA/AKT1/APOE/ATP2B4/CALM2/CASP3/CAV3/CCND1/CCND2/CDKN1A/CDKN1C/CXCR4/DAZAP2/DIRAS3/DTNBP1/DUSP1/DUSP16/DUSP5/DVL3/EDN1/EGF/F2R/FGD2/FGF18/FPR1/GADD45A/GADD45B/GADD45G/GDF15/GRM1/HEG1/HGS/HIGD1A/HRAS/HTT/HYAL2/IGF1/IGF1R/INPP5K/IPO5/IRAK3/JAK2/KARS/KIDINS220/KRAS/LRP5/LYN/MAP2K1/MAP2K2/MAP2K5/MAP3K3/MAP3K6/MAP3K8/MAPK8IP3/MAPKAPK3/MDFIC/MIR133A1/MIR133A2/MIR20A/MYOCD/NOX4/PDE5A/PDGFRB/PIK3…	97
GO:0014888	striated muscle adaptation	25/1842	56/17913	4.02169e-11	3.55409e-09	2.44587e-09	ACTA1/ATP2A2/ATP2B4/BMP10/ERRFI1/FOXO1/GATA6/GSN/HDAC4/HEY2/IGFBP5/INPP5F/LMNA/MEF2C/MIR20A/MLIP/MYH6/MYH7/MYOZ2/NPPA/SMAD3/TCAP/TNNC1/TNNT1/TRIM63	25
GO:0061337	cardiac conduction	43/1842	144/17913	5.99315e-11	5.21845e-09	3.59125e-09	ACE2/AGT/ATP1A1/ATP1A2/ATP1A3/ATP1B1/ATP1B3/ATP2A2/ATP2B4/CACNA1C/CACNA2D1/CACNA2D3/CACNB2/CALM2/CASQ1/CORIN/CTNNA3/CXADR/DMPK/DSP/GJA1/HCN4/HRC/ITPR1/ITPR3/KCNA5/KCNIP2/KCNJ2/KCNJ4/MIR1-1/NKX2-5/NPPA/PDE4D/PLN/RNF207/RYR2/SCN10A/SCN2B/SCN5A/SLC8A1/TMEM65/TNNI3K/ZMPSTE24	43
GO:0009123	nucleoside monophosphate metabolic process	77/1842	349/17913	6.34212e-11	5.44227e-09	3.74528e-09	ADK/ADSSL1/ALDOA/ALDOC/ATP1A2/ATP1B1/ATP7A/BPGM/CHCHD10/COA6/COQ9/COX10/COX15/COX5A/COX6B1/COX8A/CYC1/DDIT4/DLD/DNM1L/ENO1/ENO3/FXN/GALK1/GPI/HDAC4/HSPA8/IGF1/LDHA/MECP2/MYH6/MYH7/NADK/NDUFA10/NDUFA11/NDUFA12/NDUFA2/NDUFA5/NDUFAB1/NDUFAF1/NDUFB3/NDUFB5/NDUFB6/NDUFB9/NDUFC1/NDUFC2/NDUFS2/NDUFS6/NDUFS8/NDUFV1/NDUFV2/NDUFV3/NUDT9/NUP188/NUP214/NUPR1/OLA1/PFKL/PFKM/PGAM2/PID1/POM121C/PRKAG2/RFK/RHOA/…	77
GO:0007568	aging	72/1842	318/17913	7.65675e-11	6.47652e-09	4.45704e-09	AGT/AKT1/APP/BCL2/BCL6/CACYBP/CD68/CDKN1A/CDKN1C/COL4A2/COMP/CRYAB/CTSC/DLD/DNMBP/EDN1/ENDOG/ENO3/FOS/FOXO4/GSN/GSS/HAMP/HRAS/HYAL2/IGFBP1/IGFBP5/ITGB2/JUN/KRAS/LEP/LITAF/LMNA/LONP1/LOXL2/MAP2K1/MAP3K3/MIR590/MME/NAMPT/NDUFS6/NOX4/NUAK1/OPA1/PDE4D/PDGFRB/PENK/PICALM/PLA2R1/PLK2/PRELP/PRKCD/RELA/RETN/RGN/RNF165/RWDD1/SERPINE1/SERPINF1/SIN3A/SNCA/STAT3/TERF2/TGFB1/TGFB3/TIMP1/TIMP2/TP53/VASH1/YPEL3…	72
GO:0007015	actin filament organization	73/1842	325/17913	8.36355e-11	6.97473e-09	4.79989e-09	ABI1/ACTA1/ACTC1/ACTN1/ACTN2/AIF1/ALDOA/APOA1/ARAP1/ARHGAP35/ARHGEF2/ARPC1B/ARPC3/BCL2/CAV3/CCL11/CORO1A/CYFIP1/DBN1/DIAPH1/DPYSL3/F2RL1/FAM107A/FAT1/FCHSD2/FHOD3/FSCN1/GSN/HCK/HCLS1/ID1/INPP5K/IQGAP2/ITGB5/JAK2/LCP1/LMOD2/MIR20A/NCK2/NEBL/NOX4/PHACTR1/PHLDB2/PLEK/PLEKHG2/PLEKHH2/PPM1F/PRKCD/PROX1/PXN/RAC2/RGS4/RHOA/S100A10/SFRP1/SLIT2/SMAD3/SORBS1/SORBS2/SPTAN1/SPTBN1/SWAP70/SYNPO2L/TCAP/TGFB3/T…	73
GO:0006875	cellular metal ion homeostasis	94/1842	467/17913	1.10535e-10	9.08996e-09	6.25557e-09	ABCG2/AGT/AGTR1/AGTR2/ANXA2/APOE/APP/ATP13A2/ATP1A1/ATP1A2/ATP1A3/ATP1B1/ATP1B3/ATP2A2/ATP2B4/ATP7A/BCL2/BNIP3/C1QTNF1/CACNA1C/CACNA2D1/CACNB2/CALM2/CASQ1/CAV3/CCL11/CLN3/CORO1A/CSRP3/CYBA/DDIT3/DIAPH1/DMPK/EDN1/EDN2/EDNRA/ESR1/F2R/F2RL1/FXN/FYN/GATA2/GJA1/GNA15/GOT1/GRM1/HAMP/HEPH/HMOX2/HRC/HTT/ITPR1/ITPR3/JAK2/JPH2/KCNA5/KCNJ2/KCTD17/KCTD7/LYN/MICU2/MIR1-1/MIR133A1/MIR133A2/MT2A/MYC/PDE4D/PDGFR…	94
GO:0001933	negative regulation of protein phosphorylation	86/1842	416/17913	1.71069e-10	1.36257e-08	9.37702e-09	AKT1/APOE/ATF3/CALM2/CASP3/CAV3/CDKN1A/CDKN1C/CTDSP2/CYLD/DBNDD2/DDIT4/DTNBP1/DUSP1/DUSP16/DUSP26/EMILIN1/ERRFI1/F2RL1/FOXO1/GADD45A/GADD45B/GNAQ/GPD1L/HDAC3/HEG1/HYAL2/IGF1R/IGFBP3/IMPACT/INPP5F/INPP5K/IPO5/IRAK3/JUN/KLF4/KLHL31/LRP5/LRRK1/LYN/MIR133A1/MIR133A2/MIR20A/MIR221/MVP/MYC/MYOCD/NCK2/NNT/PDE4D/PID1/PPM1F/PPP2CA/PRKAG2/PRKCD/PTPN1/PTPRR/RAPGEF1/RGN/RGS2/RGS3/RGS4/SFRP1/SH3RF2/SIRPA/SLIT…	86
GO:0003299	muscle hypertrophy in response to stress	18/1842	32/17913	1.74896e-10	1.36257e-08	9.37702e-09	ATP2A2/ATP2B4/BMP10/ERRFI1/FOXO1/GATA6/HDAC4/HEY2/INPP5F/LMNA/MEF2C/MIR20A/MLIP/MYH6/MYH7/NPPA/SMAD3/TCAP	18
GO:0014887	cardiac muscle adaptation	18/1842	32/17913	1.74896e-10	1.36257e-08	9.37702e-09	ATP2A2/ATP2B4/BMP10/ERRFI1/FOXO1/GATA6/HDAC4/HEY2/INPP5F/LMNA/MEF2C/MIR20A/MLIP/MYH6/MYH7/NPPA/SMAD3/TCAP	18
GO:0014898	cardiac muscle hypertrophy in response to stress	18/1842	32/17913	1.74896e-10	1.36257e-08	9.37702e-09	ATP2A2/ATP2B4/BMP10/ERRFI1/FOXO1/GATA6/HDAC4/HEY2/INPP5F/LMNA/MEF2C/MIR20A/MLIP/MYH6/MYH7/NPPA/SMAD3/TCAP	18
GO:0009612	response to mechanical stimulus	52/1842	200/17913	1.87744e-10	1.44368e-08	9.93518e-09	ACTA1/AGT/AKT1/ANKRD1/ATP1A1/ATP1A2/BACE1/BAG3/BNIP3/BTG2/CAV3/CSRP3/CXCR4/CYBA/EDN1/ENDOG/FOS/FOSB/FYN/GADD45A/GATA4/GJA1/GOT1/HDAC4/HTT/JUN/KCNA5/KCNJ2/LTBR/MAP1B/MEIS2/NFKBIA/NPPA/PKD2/POSTN/PTPN11/RAF1/RELA/RETN/RHOA/RYR2/SERPINE2/SLC2A1/SLC38A2/SLC8A1/TCAP/TGFB1/THBS1/TNC/TNFRSF1A/TTN/USP53	52
GO:1903115	regulation of actin filament-based movement	22/1842	47/17913	1.90416e-10	1.44545e-08	9.94735e-09	ATP1A1/ATP1A2/ATP2A2/CACNA1C/CAV3/CTNNA3/DSP/GATA4/HCN4/KCNJ2/MIR1-1/MIR133A1/MIR133A2/MYBPC3/MYLK2/PDE4D/PLN/RNF207/RYR2/SCN5A/TNNC1/TNNT2	22
GO:0003007	heart morphogenesis	60/1842	249/17913	2.16785e-10	1.62479e-08	1.11816e-08	ACTC1/ANKRD1/ARID2/ARL13B/BMP10/CAV3/CTNNB1/DCHS1/DSP/FAT4/FZD2/GAA/GATA4/GATA6/GJA1/HEG1/HEY2/HEYL/JUN/MEF2C/MIR1-1/MIR20A/MSX1/MYBPC3/MYH6/MYH7/MYL2/MYL3/MYLK2/NKX2-5/NOS3/NOTCH2/PARVA/PIM1/PKD2/PROX1/RNF207/RTN4/RYR2/SLIT2/SMAD3/SOS1/SOX18/SOX4/SYNPO2L/TBX5/TCAP/TGFB1/TGFB2/TGFBR3/TNNC1/TNNI3/TNNT2/TP53/TPM1/TTN/XIRP2/YAP1/ZMIZ1/ZMPSTE24	60
GO:0045926	negative regulation of growth	59/1842	244/17913	2.64495e-10	1.9576e-08	1.34719e-08	ADRB1/AGT/AGTR2/APBB2/BCL11A/BCL2/BCL6/BMP10/BST2/CAV3/CCAR2/CDKN1A/CRYAB/CTSG/DCBLD2/DCUN1D3/ENO1/FHL1/FRZB/FXN/GDF15/GJA1/HYAL2/IGFBP5/MAP2/MEIS1/MIR1-1/MSX1/MT1A/MT1E/MT1G/MT1M/MT1X/MT2A/MYL2/NOTCH2/NPPA/NPPB/PPP1R9B/PPP2CA/RERG/RGS2/RGS4/RTN4/SERPINE2/SFRP1/SLIT2/SMAD3/SMARCA4/SOCS2/SPP1/TBX5/TGFB1/TGFB2/TLL2/TP53/TSPYL2/ULK2/WWC1	59
GO:0002027	regulation of heart rate	33/1842	98/17913	3.12219e-10	2.28228e-08	1.57063e-08	AGT/AGTR2/ATP2A2/CACNA1C/CACNA2D1/CACNB2/CALM2/CAV3/CTNNA3/DSP/EDN1/EDN2/GPD1L/HCN4/HEY2/HRC/KCNA5/KCNJ2/MIR1-1/MYH6/MYH7/NPPA/PDE4D/PLN/POPDC2/RGS4/RYR2/SCN10A/SCN2B/SCN5A/SLC8A1/TNNI3K/TPM1	33
GO:0010038	response to metal ion	73/1842	335/17913	3.60167e-10	2.59342e-08	1.78475e-08	ACTA1/AKT1/ALOX5AP/APP/AQP9/ARL13B/ATP13A2/ATP7A/BACE1/BCL2/BNIP3/BRAF/BSG/CACYBP/CALM2/CASP3/CCND1/CD14/CYB5A/CYBB/CYP11B1/CYP11B2/DUSP1/EDN1/EIF2AK3/ENDOG/ENTPD6/FIBIN/FOS/FOSB/FXN/GOT1/GSN/GSS/HAAO/HAMP/ITPR3/JUN/JUNB/KCNIP2/LONP1/LOXL2/MAOB/MEF2C/MT1A/MT1E/MT1G/MT1M/MT1X/MT2A/NDRG1/NPC1/PENK/PGAM2/PKD2/PLN/PPP2CA/QDPR/RYR2/S100A13/S100A8/SCN5A/SEC31A/SERPINF1/SLC30A1/SNCA/SPARC/SUCNR1/THBS1/T…	73
GO:1901652	response to peptide	96/1842	491/17913	3.63543e-10	2.59342e-08	1.78475e-08	ACTN2/ADCY3/ADCY4/ADCY6/AGT/AGTR1/AGTR2/AGTRAP/AKT1/APP/ARHGEF2/ARID1B/ATP1A3/ATP6V0E2/BACE1/BSG/BTG2/CACNA2D1/CACYBP/CAMK2A/CSRP3/CYBA/CYBB/CYC1/CYFIP1/EDN1/EGR1/EIF2B3/ERRFI1/FBN1/FOXO1/FOXO4/FYN/GDF15/GJA1/GOT1/GPR173/GRB10/GRB14/GSK3B/ID1/IGF1/IGF1R/IGFBP1/IGFBP5/INPP5K/JAK2/KLF10/KLF2/KLF4/KLF5/LEP/LYN/MAP1B/MMP2/MMP3/NAMPT/NFKBIA/NPPA/NR4A3/OPA1/PDK4/PID1/PIK3CA/PLN/PRKCD/PRKCQ/PTPN1/PTPN11…	96
GO:0051056	regulation of small GTPase mediated signal transduction	70/1842	316/17913	3.8974e-10	2.7472e-08	1.89058e-08	APOA1/APOE/ARAP1/ARHGAP1/ARHGAP24/ARHGAP35/ARHGDIA/ARHGDIB/ARHGEF12/ARHGEF17/ARHGEF18/ARHGEF2/ARHGEF28/ARHGEF9/AUTS2/BCL6/CBL/CHN1/CYTH2/CYTH3/DNMBP/ECT2L/F2R/F2RL1/FAM13B/FARP1/FGD2/FGD5/GARNL3/HEG1/HRAS/IGF1/ITGB1/JAK2/KALRN/KANK2/KRAS/LYN/LZTR1/MAP4K4/MAPRE2/MFN2/NOTCH2/OBSCN/PDGFRB/PLCE1/PLEKHG2/PREX2/RAC2/RAF1/RALGAPA2/RALGPS2/RAP1GAP/RAP1GAP2/RAPGEF1/RHOA/RHOBTB1/RHOQ/RHOT1/SHC1/SHOC2/SIPA1…	70
GO:0016049	cell growth	92/1842	466/17913	5.04635e-10	3.51523e-08	2.41912e-08	AGT/AGTR1/AGTR2/AKT1/APBB2/APOE/APP/ATAD3A/AUTS2/BCL11A/BCL2/BCL6/BMP10/BST2/CAV3/CCAR2/CDKN1A/CHPT1/CLSTN1/CPNE5/CRYAB/CTNNB1/CXCR4/CYBA/CYFIP1/DCBLD2/DCUN1D3/DDR1/EDN1/ENO1/FAM107A/FHL1/FN1/FRZB/FXN/GATA4/GJA1/GSK3B/HAMP/HBEGF/HYAL2/IGF1/IGFBP1/IGFBP3/IGFBP4/IGFBP5/IGFBP7/IMPACT/ITGB1/LTBP4/MAP1B/MAP2/MAP2K5/MSX1/MYL2/MYOCD/NPPA/NPPB/PDLIM5/PLCE1/POSTN/PPP1R9B/PPP2CA/PRKCQ/RERG/RGS2/RGS4/RHOA/R…	92
GO:0002026	regulation of the force of heart contraction	16/1842	27/17913	6.34208e-10	4.36645e-08	3.00492e-08	ADRB1/ATP1A1/ATP1A2/ATP2A2/ATP2B4/CSRP3/EDN2/GAA/MYH6/MYH7/MYL2/MYL3/NOS3/PLN/RYR2/SLC8A1	16
GO:1902903	regulation of supramolecular fiber organization	69/1842	313/17913	6.48218e-10	4.4116e-08	3.036e-08	ACTN2/AEBP1/APOA1/APOE/APP/ARAP1/ARHGAP35/ARHGEF2/ARPC1B/ARPC3/BMP10/CAMSAP2/CAV3/CCL11/CLIP3/CORO1A/CRYAB/CYFIP1/DCTN1/EDN1/EMILIN1/F2RL1/FCHSD2/FES/FHOD3/FKBP4/GSN/HCK/HCLS1/HSPA8/ID1/INPP5K/IQGAP2/LDLR/LMOD2/MAP1B/MAP2/MECP2/MEF2C/MIR1-1/MIR20A/MYLK3/NAV3/NCK2/NOX4/NUMA1/PHLDB2/PLEK/PLEKHG2/PLEKHH2/PPM1F/PRKCD/PROX1/PXN/RGS4/RHOA/S100A10/SFRP1/SLIT2/SMAD3/SNCA/SPTAN1/SPTBN1/SWAP70/SYNPO2L/TGFB…	69
GO:0055008	cardiac muscle tissue morphogenesis	25/1842	63/17913	8.61564e-10	5.79696e-08	3.98937e-08	ACTC1/ANKRD1/BMP10/DSP/HEG1/HEY2/MYBPC3/MYH6/MYH7/MYL2/MYL3/MYLK2/NKX2-5/PROX1/RYR2/TCAP/TGFB1/TGFB2/TGFBR3/TNNC1/TNNI3/TNNT2/TPM1/TTN/XIRP2	25
GO:0035265	organ growth	47/1842	179/17913	9.78212e-10	6.50786e-08	4.4786e-08	ACACB/AGT/AGTR2/AKT1/AR/ARID2/BCL2/BMP10/CAV3/COL27A1/COMP/EDN1/ESR1/FGF7/FXN/GATA4/GATA6/GJA1/HAMP/HEG1/HEY2/IGF1/LEP/LEPR/MEF2C/MEIS1/MIR1-1/MIR590/MYH6/NKX2-5/NLGN4X/NPPA/PDGFRB/PDLIM5/PIM1/PROX1/PTPN11/RGS2/RGS4/SORBS2/TBX5/TGFB2/TGFBR3/TMEM38B/WWC1/YAP1/ZMPSTE24	47
GO:0086003	cardiac muscle cell contraction	26/1842	68/17913	1.03548e-09	6.81228e-08	4.6881e-08	ATP1A1/ATP1A2/CACNA1C/CACNA2D1/CACNB2/CAV3/CTNNA3/DSP/FGF12/GATA4/GJA1/GPD1L/KCNA5/KCNE4/KCNJ2/KCNJ8/MIR1-1/MIR133A1/MIR133A2/PDE4D/PLN/RNF207/RYR2/SCN2B/SCN5A/SGCD	26
GO:0007265	Ras protein signal transduction	70/1842	324/17913	1.22191e-09	7.95046e-08	5.47138e-08	AGTR1/AIF1/APOA1/APOE/ARHGAP1/ARHGAP35/ARHGDIA/ARHGDIB/ARHGEF12/ARHGEF17/ARHGEF18/ARHGEF2/ARHGEF28/ARHGEF9/AUTS2/BCL6/CBL/CDKN1A/CYFIP1/CYTH2/CYTH3/DNMBP/ECT2L/ELMO1/F2R/F2RL1/FARP1/FGD2/FGD5/HEG1/HRAS/IGF1/ITGB1/JAK2/JUN/KALRN/KANK2/KRAS/LYN/LZTR1/MAP4K4/MAPRE2/MFN2/MRAS/NOTCH2/NRAS/OBSCN/PDGFRB/PECAM1/PLCE1/PLEKHG2/PLK2/PREX2/RAF1/RALA/RALGPS2/RAP2A/RAPGEF1/RHOA/RIT1/RRAS/SHC1/SHOC2/SOS1/SYNPO2…	70
GO:0003044	regulation of systemic arterial blood pressure mediated by a chemical signal	20/1842	43/17913	1.47269e-09	9.47801e-08	6.52262e-08	ACE/ACE2/ADRB1/AGT/AGTR1/AGTR2/CORIN/CTSG/CYBA/CYP11B2/EDN1/EDN2/F2R/F2RL1/MME/NOS3/PDE4D/RHOA/SUCNR1/TPM1	20
GO:0006732	coenzyme metabolic process	76/1842	366/17913	1.6075e-09	1.02344e-07	7.04317e-08	AASDHPPT/ACACB/ACAT1/ACOT6/ACOT8/ACSF2/ACSL3/ACSS2/ALDOA/ALDOC/BPGM/COQ2/COQ3/COQ4/COQ6/COQ7/COQ8A/COQ9/CYB5A/CYB5R3/DDIT4/DGAT1/DLD/ENO1/ENO3/FASN/GALK1/GCDH/GPD1L/GPD2/GPI/HAAO/HDAC4/HSD17B4/IDH2/IGF1/LDHA/MCCC2/MDH1/MDH2/METTL16/MLYCD/MOCS2/MPC2/MTHFR/NADK/NADK2/NAMPT/NNMT/NUP188/NUP214/NUPR1/PANK3/PCCA/PDHA1/PDHB/PDK4/PDSS1/PDSS2/PFKL/PFKM/PGAM2/PMVK/POM121C/PRKAG2/RFK/SCD/SHMT2/SLC2A1/SLC2A3…	76
GO:2000377	regulation of reactive oxygen species metabolic process	49/1842	194/17913	1.80472e-09	1.13678e-07	7.82316e-08	AATF/ACE2/AGT/AGTR1/AGTR2/AIF1/AKT1/ATP2B4/BCL2/BCO2/BNIP3/CDKN1A/CRYAB/CYBA/CYP1B1/EDN1/F2RL1/FOXO1/FYN/GADD45A/GLA/HDAC4/ITGB2/JAK2/KLF2/KLF4/LEP/MIR590/MMP3/NNT/NOX4/PDGFRB/PID1/PKD2/PLIN5/PRKCD/RAC2/RGN/RHOA/SIRPA/SMAD3/SNCA/STAT3/TGFB1/THBS1/TP53/TYROBP/VDAC1/ZC3H12A	49
GO:0072593	reactive oxygen species metabolic process	61/1842	269/17913	2.00308e-09	1.24844e-07	8.59159e-08	AATF/ACE2/AGT/AGTR1/AGTR2/AIF1/AKT1/ATP2B4/ATP7A/BCL2/BCO2/BNIP3/CDKN1A/CRYAB/CYBA/CYBB/CYP1B1/DDIT4/EDN1/F2RL1/FOXO1/FYN/GADD45A/GLA/HDAC4/ITGB2/JAK2/KLF2/KLF4/LEP/MAOB/MIR590/MMP3/NDUFAF2/NNT/NOS3/NOX4/PDGFRB/PDK4/PID1/PKD2/PLA2R1/PLIN5/PRKCD/PXDN/PXDNL/RAC2/RFK/RGN/RHOA/SH3PXD2A/SIRPA/SMAD3/SNCA/STAT3/TGFB1/THBS1/TP53/TYROBP/VDAC1/ZC3H12A	61
GO:0001558	regulation of cell growth	80/1842	396/17913	2.29305e-09	1.40778e-07	9.68809e-08	AGT/AGTR1/AGTR2/AKT1/APBB2/APOE/ATAD3A/BCL11A/BCL2/BCL6/BMP10/BST2/CAV3/CCAR2/CDKN1A/CHPT1/CLSTN1/CPNE5/CRYAB/CXCR4/CYBA/CYFIP1/DCBLD2/DCUN1D3/DDR1/EDN1/ENO1/FAM107A/FHL1/FN1/FRZB/FXN/GJA1/GSK3B/HAMP/HBEGF/HYAL2/IGF1/IGFBP1/IGFBP3/IGFBP4/IGFBP5/IGFBP7/LTBP4/MAP1B/MAP2/MAP2K5/MSX1/MYL2/MYOCD/NPPA/NPPB/PLCE1/PPP1R9B/PPP2CA/PRKCQ/RERG/RGS2/RGS4/RHOA/RTN4/S100A8/S100A9/SERPINE2/SFRP1/SLIT2/SMAD3/SMAR…	80
GO:0043405	regulation of MAP kinase activity	69/1842	322/17913	2.30627e-09	1.40778e-07	9.68809e-08	AJUBA/APOE/CAV3/CXCR4/DTNBP1/DUSP1/DUSP16/DUSP5/DVL3/EDN1/EGF/F2R/FGD2/FGF18/FPR1/GADD45A/GADD45B/GADD45G/GDF15/GRM1/HGS/HRAS/HYAL2/IGF1/IGF1R/INPP5K/IRAK3/JAK2/KARS/KIDINS220/KRAS/LYN/MAP2K1/MAP2K2/MAP2K5/MAP3K3/MAP3K6/MAP3K8/MAPK8IP3/MAPKAPK3/MDFIC/NOX4/PDE5A/PDGFRB/PIK3CG/PIK3R6/PLCE1/PPP2CA/PRKCD/PTPN1/PTPN11/RAF1/RAPGEF1/RGS2/RGS3/RGS4/S100A12/SASH1/SFRP1/SHC1/SMPD1/SPRED2/TGFB1/TGFB3/THBS1/…	69
GO:2001233	regulation of apoptotic signaling pathway	80/1842	397/17913	2.5891e-09	1.56429e-07	1.07652e-07	ACAA2/AGT/AGTR2/AKT1/AR/ARHGEF2/ATF3/BAG5/BCL2/BNIP3/CCAR2/CD44/CHCHD10/CTNNB1/CTSC/CYLD/DAPK3/DDIT3/DNM1L/EIF2AK3/ENO1/FBXW7/FEM1B/FXN/FYN/G0S2/GATA4/GSK3B/GSN/HIGD1A/HMGB2/HTT/HYAL2/IGF1/IVNS1ABP/JAK2/LGALS3/LMNA/LTBR/MAP2K5/MFF/MIR221/MLLT11/MSX1/NCK2/NOS3/NUPR1/OPA1/PDCD5/PLEKHF1/PRKCD/PRKRA/PTPN1/RAF1/RELA/S100A8/S100A9/SERINC3/SERPINE1/SFRP1/SH3RF1/SKIL/SMAD3/STRADB/TAF9/THBS1/TMBIM1/TP53/T…	80
GO:0032956	regulation of actin cytoskeleton organization	65/1842	297/17913	2.75729e-09	1.64908e-07	1.13487e-07	ACTN2/APOA1/ARAP1/ARHGAP35/ARHGDIA/ARHGDIB/ARPC1B/ARPC3/BMP10/BST2/CAV3/CCL11/CORO1A/CYFIP1/DAPK3/DIXDC1/EDN1/EPHA3/F2RL1/FAM107A/FCHSD2/FES/FHOD3/FSCN1/GSN/HCK/HCLS1/HRAS/ID1/INPP5K/IQGAP2/LMOD2/MEF2C/MIR1-1/MIR20A/MYLK3/NCK2/NOTCH2/NOX4/PDGFRA/PDGFRB/PHLDB2/PLEK/PLEKHG2/PLEKHH2/PPM1F/PRKCD/PROX1/PXN/RGS4/RHOA/RHOQ/S100A10/SFRP1/SLIT2/SMAD3/SPTAN1/SPTBN1/SWAP70/SYNPO2L/TGFB1/TGFB3/TPM1/TRIM27/WAS	65
GO:0046578	regulation of Ras protein signal transduction	52/1842	215/17913	2.98279e-09	1.76611e-07	1.21541e-07	APOA1/APOE/ARHGAP35/ARHGDIA/ARHGDIB/ARHGEF12/ARHGEF17/ARHGEF18/ARHGEF2/ARHGEF28/ARHGEF9/AUTS2/BCL6/CBL/CYTH2/CYTH3/DNMBP/ECT2L/F2R/F2RL1/FARP1/FGD2/FGD5/HEG1/HRAS/IGF1/ITGB1/JAK2/KALRN/KANK2/KRAS/LYN/LZTR1/MAP4K4/MAPRE2/MFN2/NOTCH2/OBSCN/PDGFRB/PLCE1/PLEKHG2/PREX2/RAF1/RALGPS2/RAPGEF1/SHC1/SHOC2/SOS1/SYNPO2L/TGFB2/TIMP2/TRIO	52
GO:0001508	action potential	36/1842	123/17913	3.8917e-09	2.28146e-07	1.57007e-07	ATP1A1/ATP1A2/ATP1B1/ATP2A2/CACNA1C/CACNA2D1/CACNB2/CAV3/CLN3/CTNNA3/CXADR/DSP/FGF12/FMR1/GJA1/GPD1L/HCN4/KCNA5/KCNE4/KCNIP2/KCNJ2/KCNJ8/MIR1-1/MIR133A1/MIR133A2/MYH14/PTPN3/RNF207/RYR2/SCN10A/SCN2B/SCN5A/SLC8A1/SLMAP/USP53/YWHAH	36
GO:0002446	neutrophil mediated immunity	94/1842	499/17913	4.0769e-09	2.3666e-07	1.62866e-07	ACAA1/ACE/AGL/AGPAT2/ALDOA/ALDOC/ALOX5/ANXA2/ASAH1/BST2/CANT1/CAP1/CAPN1/CD14/CD44/CD59/CD68/CD93/CFD/CKAP4/COMMD3/CRISPLD2/CTSB/CTSC/CTSG/CYB5R3/CYBA/CYBB/CYFIP1/DDOST/DGAT1/DIAPH1/DOCK2/DSP/F2RL1/FCER1G/FCGR2A/FCN1/FGR/FPR1/FRK/GAA/GLA/GLB1/GPI/GSDMD/GSN/HMOX2/HSPA6/HSPA8/IL6/IQGAP2/ITGB2/LAMP2/LGALS3/LYZ/MGST1/MME/MVP/NDUFC2/NRAS/ORMDL3/PECAM1/PFKL/PLAU/PRDX6/PRKCD/PSMC2/PYGB/QPCT/RAB3A/RAB5C/…	94
GO:0022411	cellular component disassembly	93/1842	492/17913	4.12993e-09	2.37411e-07	1.63382e-07	ACTN2/AIFM1/ARHGEF2/ARID2/ATP13A2/BNIP3/BSG/C1QB/C1QC/CALCOCO2/CAMKK2/CAPN1/CASP3/CD44/CHCHD10/CLN3/CTNNB1/CTSG/CTSK/DCTN1/DDIT4/DDR1/DNM1L/DVL3/ENDOG/ERAL1/F2RL1/FAP/FBXW7/FSCN1/FYCO1/FZD2/GOLGA2/GSK3B/GSN/HIST3H2A/HMGB2/HSPA2/HSPA8/HTRA1/HTT/IGF1R/IL6/IRAK3/LAMP2/LCP1/LMOD2/MAP1B/MFN2/MMP15/MMP2/MMP3/MRPL1/MRPL16/MRPL3/MRPL35/MRPL38/MRPL44/MRPL50/MRPL52/MRPS14/MRPS18A/MRPS22/MRPS31/MRPS36/MRPS9…	93
GO:0071496	cellular response to external stimulus	68/1842	320/17913	4.3265e-09	2.46319e-07	1.69513e-07	AGT/AIF1/AIFM1/AKT1/ANKRD1/ARHGAP35/ATF3/ATP1A1/ATP1A2/AXL/BAG3/BCL11A/BCL2/BNIP3/CBL/CD68/CDKN1A/CYBA/CYBB/DNM1L/EIF2AK3/FAM107A/FES/FOS/FOXO1/FYN/GADD45A/GJA1/GOT1/GSDMD/HDAC4/HIGD1A/HSPA8/IFI16/IMPACT/JUN/KANK2/KCNJ2/KLF10/LAMP2/LEP/LTBR/LYN/MTMR3/MYOCD/NAMPT/NPPA/OPA1/PDK4/PENK/PIM1/POSTN/PPM1D/PPP1R9B/PTPN11/RNF152/SFRP1/SLC2A1/SLC38A2/TGFB1/TNC/TNFRSF1A/TP53/ULK1/WDR45B/WIPI1/XBP1/ZC3H12A	68
GO:0001501	skeletal system development	91/1842	479/17913	4.69659e-09	2.64792e-07	1.82226e-07	ABI1/ALPL/ANKH/ANXA2/ARID5B/ATP7A/BMP10/BMP8A/CD44/CDH11/CDKN1C/CHRDL2/CHSY1/CMKLR1/COL27A1/COMP/CREB3L2/CTNNB1/CTSK/DCHS1/DEAF1/EDN1/EIF2AK3/EP300/EXT1/EXTL1/FAT4/FBN1/FBXW4/FBXW7/FGF18/FGR/FRZB/GDF10/GJA1/GLG1/GLI3/HDAC4/HYAL2/IFT140/IGF1/LEP/LOXL2/LRP5/LRRK1/LUM/MEF2C/MEIS1/MGP/MMP2/MSX1/MUSTN1/NOTCH2/NPR3/OSR1/PAPSS1/PDGFRA/PRELP/PRKRA/PRRX1/PTPN11/RANBP3L/RDH10/RELA/RGN/RHOA/RUNX2/SERPINH1/S…	91
GO:0051493	regulation of cytoskeleton organization	90/1842	472/17913	4.74041e-09	2.64792e-07	1.82226e-07	ACTN2/APOA1/ARAP1/ARHGAP35/ARHGDIA/ARHGDIB/ARHGEF2/ARPC1B/ARPC3/BICD1/BMP10/BST2/CAMSAP2/CAV3/CCL11/CLIP3/CORO1A/CTNNB1/CYFIP1/CYLD/DAPK3/DCTN1/DIAPH1/DIXDC1/EDN1/EPHA3/F2RL1/FAM107A/FCHSD2/FES/FHOD3/FKBP4/FSCN1/GSK3B/GSN/HCK/HCLS1/HRAS/ID1/INPP5K/IQGAP2/LMOD2/MAP1B/MAP2/MECP2/MEF2C/MIR1-1/MIR20A/MYLK3/NAV3/NCK2/NEXN/NOTCH2/NOX4/NUMA1/PDGFRA/PDGFRB/PHLDB1/PHLDB2/PLEK/PLEKHG2/PLEKHH2/PLK2/PPM1F/PR…	90
GO:0055003	cardiac myofibril assembly	12/1842	17/17913	5.10551e-09	2.82521e-07	1.94426e-07	ACTC1/CSRP3/FHOD3/MYL2/MYLK3/NEBL/NKX2-5/PDGFRA/PDGFRB/PROX1/TCAP/TTN	12
GO:1903779	regulation of cardiac conduction	26/1842	73/17913	6.07966e-09	3.33312e-07	2.2938e-07	ACE2/AGT/ATP1A1/ATP1A2/ATP1A3/ATP1B1/ATP1B3/ATP2A2/ATP2B4/CALM2/CASQ1/CORIN/CXADR/DMPK/HRC/ITPR1/ITPR3/MIR1-1/NKX2-5/NPPA/PDE4D/RNF207/RYR2/SLC8A1/TMEM65/TNNI3K	26
GO:1901653	cellular response to peptide	74/1842	364/17913	6.89415e-09	3.74498e-07	2.57723e-07	ACTN2/ADCY3/ADCY4/ADCY6/AGT/AGTR1/AGTR2/AGTRAP/AKT1/APP/ARHGEF2/ARID1B/ATP1A3/ATP6V0E2/BACE1/CACNA2D1/CAMK2A/CSRP3/CYBA/CYFIP1/EDN1/ERRFI1/FBN1/FOXO1/FOXO4/FYN/GDF15/GOT1/GPR173/GRB10/GRB14/GSK3B/ID1/IGF1/IGF1R/IGFBP1/INPP5K/JAK2/KLF10/KLF2/KLF4/KLF5/LEP/LYN/MAP1B/NAMPT/NR4A3/OPA1/PDK4/PID1/PIK3CA/PRKCD/PRKCQ/PTPN1/PTPN11/PTPRA/PTPRE/PXN/RANGAP1/RELA/RHOQ/SHC1/SOCS1/SOCS2/SORBS1/SOS1/SP1/STAT3/ST…	74
GO:0071559	response to transforming growth factor beta	55/1842	239/17913	7.11914e-09	3.83204e-07	2.63715e-07	ANKRD1/ARHGEF18/CAV3/CBL/CDKN1C/COL4A2/CREBBP/EDN1/EMILIN1/EP300/FBN1/FMOD/FOS/FYN/GCNT2/GDF10/GDF15/GLG1/GOT1/HIPK2/HTRA1/HYAL2/ID1/ITGB5/JUN/LEFTY2/LRRC32/LTBP2/LTBP4/MEF2C/MXRA5/MYOCD/NOX4/PDCD5/PDE3A/PENK/POSTN/PXN/RASL11B/RHOA/SFRP1/SKI/SKIL/SMAD3/SMURF1/SMURF2/TGFB1/TGFB2/TGFB3/TGFBR3/THBS1/TP53/ZEB1/ZFHX3/ZYX	55
GO:0003229	ventricular cardiac muscle tissue development	22/1842	55/17913	7.39437e-09	3.90911e-07	2.69019e-07	ADAMTS9/BMP10/DSP/HEG1/HEY2/MYBPC3/MYH6/MYH7/MYL2/MYL3/NKX2-5/PROX1/RYR2/TBX5/TGFB1/TGFB2/TGFBR3/TNNC1/TNNI3/TNNT2/TPM1/ZMPSTE24	22
GO:0006120	mitochondrial electron transport, NADH to ubiquinone	22/1842	55/17913	7.39437e-09	3.90911e-07	2.69019e-07	COQ9/DLD/NDUFA10/NDUFA11/NDUFA12/NDUFA2/NDUFA5/NDUFAB1/NDUFAF1/NDUFB3/NDUFB5/NDUFB6/NDUFB9/NDUFC1/NDUFC2/NDUFS2/NDUFS6/NDUFS8/NDUFV1/NDUFV2/NDUFV3/SNCA	22
GO:1904062	regulation of cation transmembrane transport	66/1842	312/17913	8.81384e-09	4.59138e-07	3.15971e-07	ACTN2/AGT/AHNAK/APP/ATP1A2/ATP1B1/ATP1B3/ATP2B4/ATP7A/CACNA1C/CACNA2D1/CACNB2/CALM2/CAPN1/CASQ1/CAV3/CCL2/CHCHD10/CORO1A/CYBA/DIAPH1/F2R/FGF12/FHL1/FMR1/FYN/GPD1L/GRIA3/HRC/HSPA2/HTT/JPH2/KCNAB1/KCNIP2/KCNJ2/KLHL24/LYN/MEF2C/MIR1-1/MIR133A1/MIR133A2/NPPA/OSR1/PDE4D/PIK3CG/PKD2/PLN/PTPN3/RGN/RGS2/RGS4/RNF207/RYR2/SCN2B/SCN5A/SLC30A1/SLC8A1/SLMAP/SNCA/TESC/TGFB1/THY1/TMEM38B/WNK2/WWP2/YWHAH	66
GO:0043312	neutrophil degranulation	91/1842	485/17913	8.84002e-09	4.59138e-07	3.15971e-07	ACAA1/AGL/AGPAT2/ALDOA/ALDOC/ALOX5/ANXA2/ASAH1/BST2/CANT1/CAP1/CAPN1/CD14/CD44/CD59/CD68/CD93/CFD/CKAP4/COMMD3/CRISPLD2/CTSB/CTSC/CTSG/CYB5R3/CYBA/CYBB/CYFIP1/DDOST/DGAT1/DIAPH1/DOCK2/DSP/FCER1G/FCGR2A/FCN1/FGR/FPR1/FRK/GAA/GLA/GLB1/GPI/GSDMD/GSN/HMOX2/HSPA6/HSPA8/IQGAP2/ITGB2/LAMP2/LGALS3/LYZ/MGST1/MME/MVP/NDUFC2/NRAS/ORMDL3/PECAM1/PFKL/PLAU/PRDX6/PRKCD/PSMC2/PYGB/QPCT/RAB3A/RAB5C/RAB9B/RETN/RHO…	91
GO:0086065	cell communication involved in cardiac conduction	22/1842	56/17913	1.1001e-08	5.66409e-07	3.89794e-07	ATP1A1/ATP1A2/ATP1A3/ATP1B1/CACNA1C/CACNA2D1/CACNB2/CALM2/CTNNA3/CXADR/DSP/GJA1/HCN4/HRC/KCNA5/PDE4D/RNF207/RYR2/SCN10A/SCN5A/SLC8A1/TNNI3K	22
GO:0045823	positive regulation of heart contraction	18/1842	39/17913	1.14033e-08	5.82058e-07	4.00563e-07	ACE2/ADRB1/ATP1A1/ATP2A2/EDN1/EDN2/HEY2/HRC/MIR1-1/NKX2-5/NPPA/PDE4D/RGS2/RGS4/RNF207/RYR2/TGFB2/TPM1	18
GO:0002283	neutrophil activation involved in immune response	91/1842	488/17913	1.20499e-08	6.09805e-07	4.19658e-07	ACAA1/AGL/AGPAT2/ALDOA/ALDOC/ALOX5/ANXA2/ASAH1/BST2/CANT1/CAP1/CAPN1/CD14/CD44/CD59/CD68/CD93/CFD/CKAP4/COMMD3/CRISPLD2/CTSB/CTSC/CTSG/CYB5R3/CYBA/CYBB/CYFIP1/DDOST/DGAT1/DIAPH1/DOCK2/DSP/FCER1G/FCGR2A/FCN1/FGR/FPR1/FRK/GAA/GLA/GLB1/GPI/GSDMD/GSN/HMOX2/HSPA6/HSPA8/IQGAP2/ITGB2/LAMP2/LGALS3/LYZ/MGST1/MME/MVP/NDUFC2/NRAS/ORMDL3/PECAM1/PFKL/PLAU/PRDX6/PRKCD/PSMC2/PYGB/QPCT/RAB3A/RAB5C/RAB9B/RETN/RHO…	91
GO:0002576	platelet degranulation	36/1842	128/17913	1.25116e-08	6.27809e-07	4.32048e-07	ACTN1/ACTN2/ALDOA/ANXA5/APOA1/APP/CD9/CFD/EGF/F13A1/F8/FCER1G/FN1/IGF1/ISLR/LAMP2/LEFTY2/LHFPL2/LYN/OLA1/PECAM1/PLEK/PROS1/SERPINA3/SERPINE1/SPARC/SRGN/TGFB1/TGFB2/TGFB3/THBS1/TIMP1/TLN1/TTN/VCL/VWF	36
GO:2000379	positive regulation of reactive oxygen species metabolic process	31/1842	101/17913	1.33809e-08	6.65785e-07	4.58183e-07	ACE2/AGT/AGTR1/AGTR2/AIF1/AKT1/CDKN1A/CYBA/EDN1/F2RL1/GADD45A/HDAC4/ITGB2/JAK2/KLF2/KLF4/LEP/NNT/NOX4/PDGFRB/PID1/PKD2/PRKCD/RGN/SMAD3/SNCA/TGFB1/THBS1/TP53/TYROBP/ZC3H12A	31
GO:0031099	regeneration	47/1842	194/17913	1.60025e-08	7.78797e-07	5.35955e-07	APOA1/AXL/BCL2/CCND1/CD9/CDKN1A/CEBPB/ENO3/GATA4/GJA1/GLI3/GSN/HAMP/IGF1/IGFBP1/INPP5F/JAK2/JUN/KLF4/KLF5/LCP1/MAP1B/MAP2K1/MAP4K4/MAPK8IP3/MATN2/MIR221/MIR590/MUSTN1/NINJ2/NNMT/NR4A3/POSTN/PRRX1/PTPN3/RGMA/RGN/SGCA/SOX15/SPP1/SULF2/TGFB1/TGFBR3/THY1/TNC/ULK1/YAP1	47
GO:0009991	response to extracellular stimulus	92/1842	498/17913	1.60298e-08	7.78797e-07	5.35955e-07	ACACB/ACAT1/ACSL3/ACTA1/ADRB1/ADSSL1/AGL/AIF1/AIFM1/AKT1/ALPL/APOA1/APOE/ARHGAP35/ATF3/AXL/BCL11A/BCL2/BMP8A/CBL/CCND1/CD68/CDKN1A/CHSY1/CYBA/CYBB/DDIT3/DNM1L/EIF2AK3/FAM107A/FES/FOS/FOXO1/FOXO4/FYN/GATA4/GDF15/GNPAT/GSDMD/GSN/GSS/HAMP/HIGD1A/HSPA8/IFI16/IMPACT/JUN/KANK2/KLF10/LAMP2/LDLR/LEP/LIPG/LYN/MAP1B/MTHFR/MTMR3/MYOCD/NAMPT/NNT/OMA1/OPA1/OXCT1/PDK4/PENK/PIM1/POSTN/PPM1D/PPP1R9B/PROX1/RELA/R…	92
GO:0060415	muscle tissue morphogenesis	26/1842	76/17913	1.60468e-08	7.78797e-07	5.35955e-07	ACTC1/ANKRD1/BMP10/DSP/FZD2/HEG1/HEY2/MYBPC3/MYH6/MYH7/MYL2/MYL3/MYLK2/NKX2-5/PROX1/RYR2/TCAP/TGFB1/TGFB2/TGFBR3/TNNC1/TNNI3/TNNT2/TPM1/TTN/XIRP2	26
GO:0051188	cofactor biosynthetic process	65/1842	310/17913	1.63738e-08	7.88206e-07	5.42431e-07	ACACB/ACAT1/ACSL3/ACSS2/ALAS1/ALDOA/ALDOC/BPGM/COQ2/COQ3/COQ4/COQ6/COQ7/COQ8A/COQ9/COX10/COX15/CYBA/CYBB/DDIT4/DLD/ENO1/ENO3/FASN/FXN/FYN/GALK1/GCDH/GPI/GSS/HAAO/HDAC4/IDH2/IGF1/LDHA/MAOB/METTL16/MLYCD/MOCS2/MPC2/NADK/NADK2/NAMPT/NNMT/NUP188/NUP214/NUPR1/PANK3/PDHA1/PDHB/PDK4/PDSS1/PDSS2/PFKL/PFKM/PGAM2/POM121C/PRKAG2/RFK/RSAD1/SCD/SNCA/STAT3/SUCLA2/TP53	65
GO:0072503	cellular divalent inorganic cation homeostasis	77/1842	392/17913	1.65124e-08	7.88466e-07	5.4261e-07	AGT/AGTR1/ANXA2/APOE/APP/ATP13A2/ATP1A2/ATP1B1/ATP2A2/ATP2B4/BCL2/BNIP3/C1QTNF1/CACNA1C/CACNA2D1/CACNB2/CALM2/CASQ1/CAV3/CCL11/CLN3/CORO1A/CSRP3/CYBA/DDIT3/DIAPH1/DMPK/EDN1/EDN2/EDNRA/ESR1/F2R/F2RL1/FYN/GATA2/GJA1/GNA15/GOT1/GRM1/HRC/HTT/ITPR1/ITPR3/JAK2/JPH2/KCNA5/KCTD17/LYN/MICU2/MIR1-1/MIR133A1/MIR133A2/PDE4D/PDGFRA/PIK3CG/PKD2/PLCE1/PLN/RGN/RYR2/S100A8/S100A9/S1PR3/SLC30A1/SLC30A2/SLC30A3/SLC…	77
GO:0001655	urogenital system development	67/1842	324/17913	1.76085e-08	8.32657e-07	5.73021e-07	ACAT1/ACE/AGT/AGTR1/AGTR2/AR/ARID5B/BCL2/CDKN1C/COL4A1/CRLF1/CTNNB1/DCHS1/DLG5/EGR1/ESR1/FAT4/FBN1/FEM1B/FKBP4/GATA2/GLI3/GPR4/GZF1/HEYL/HYAL2/ID3/IFT140/IRX2/IRX3/ITGB4/KANK2/KCNJ8/KLHL3/MEF2C/MME/MYC/MYO1E/MYOCD/NID1/OSR1/PDGFRA/PDGFRB/PECAM1/PKD2/PLCE1/PROM1/PROX1/RDH10/RGN/SEC61A1/SERPINF1/SFRP1/SGPL1/SLIT2/SMAD3/SOX4/SULF1/SULF2/TGFB1/TGFB2/TIPARP/TNC/TRAF3IP1/WWTR1/YAP1/ZMPSTE24	67
GO:0042119	neutrophil activation	92/1842	499/17913	1.77191e-08	8.32657e-07	5.73021e-07	ACAA1/AGL/AGPAT2/ALDOA/ALDOC/ALOX5/ANXA2/ASAH1/BST2/CANT1/CAP1/CAPN1/CD14/CD44/CD59/CD68/CD93/CFD/CKAP4/COMMD3/CRISPLD2/CTSB/CTSC/CTSG/CYB5R3/CYBA/CYBB/CYFIP1/DDOST/DGAT1/DIAPH1/DOCK2/DSP/F2RL1/FCER1G/FCGR2A/FCN1/FGR/FPR1/FRK/GAA/GLA/GLB1/GPI/GSDMD/GSN/HMOX2/HSPA6/HSPA8/IQGAP2/ITGB2/LAMP2/LGALS3/LYZ/MGST1/MME/MVP/NDUFC2/NRAS/ORMDL3/PECAM1/PFKL/PLAU/PRDX6/PRKCD/PSMC2/PYGB/QPCT/RAB3A/RAB5C/RAB9B/RE…	92
GO:0071560	cellular response to transforming growth factor beta stimulus	53/1842	233/17913	2.0233e-08	9.43304e-07	6.49167e-07	ANKRD1/ARHGEF18/CAV3/CBL/CDKN1C/COL4A2/CREBBP/EDN1/EMILIN1/EP300/FBN1/FMOD/FOS/FYN/GCNT2/GDF10/GDF15/GLG1/GOT1/HIPK2/HTRA1/HYAL2/ID1/ITGB5/JUN/LEFTY2/LRRC32/LTBP2/LTBP4/MEF2C/MYOCD/NOX4/PDCD5/PDE3A/PENK/POSTN/PXN/RASL11B/RHOA/SFRP1/SKI/SKIL/SMAD3/SMURF1/SMURF2/TGFB1/TGFB2/TGFB3/TGFBR3/THBS1/TP53/ZEB1/ZYX	53
GO:0002028	regulation of sodium ion transport	25/1842	72/17913	2.14589e-08	9.92643e-07	6.83121e-07	AKT1/ATP1A1/ATP1A2/ATP1B1/ATP1B3/ATP2B4/CAV3/DMPK/FGF12/GPD1L/KLHL24/MLLT6/NKX2-5/NOS3/OSR1/PTPN3/SCN2B/SCN5A/SERPINE2/SLC8A1/SLMAP/TESC/TGFB1/WNK2/YWHAH	25
GO:0048644	muscle organ morphogenesis	27/1842	82/17913	2.17081e-08	9.96387e-07	6.85697e-07	ACTC1/ANKRD1/ARID5B/BMP10/DSP/FZD2/HEG1/HEY2/MYBPC3/MYH6/MYH7/MYL2/MYL3/MYLK2/NKX2-5/PROX1/RYR2/TCAP/TGFB1/TGFB2/TGFBR3/TNNC1/TNNI3/TNNT2/TPM1/TTN/XIRP2	27
GO:1901654	response to ketone	46/1842	191/17913	2.7538e-08	1.25425e-06	8.63154e-07	ADCY3/ADCY6/AGTR2/AIFM1/AKT1/AR/CBL/CCND1/CDKN1A/CYBA/CYBB/DDIT4/DUSP1/EDN1/ELK1/ERRFI1/FBXO32/FDX1/FIBIN/FOS/FOSB/FOXO1/GABRB1/GLB1/IGFBP7/KLF2/KLF4/MAOB/MSN/NME1/OPA1/PLN/RELA/RWDD1/SERPINF1/SFRP1/SIN3A/SLIT2/SPP1/TGFB1/TGFB2/TGFB3/TGFBR3/THBS1/TNC/YAP1	46
GO:0043434	response to peptide hormone	78/1842	404/17913	2.90443e-08	1.30291e-06	8.96644e-07	ACTN2/ADCY3/ADCY4/ADCY6/AGT/AGTR1/AGTR2/AGTRAP/AKT1/ARID1B/ATP6V0E2/BSG/BTG2/CACYBP/CAMK2A/CSRP3/CYBA/CYBB/CYC1/CYFIP1/EDN1/EGR1/EIF2B3/ERRFI1/FBN1/FOXO1/FOXO4/FYN/GDF15/GJA1/GOT1/GPR173/GRB10/GRB14/IGF1R/IGFBP1/IGFBP5/INPP5K/JAK2/LEP/LYN/MAP1B/NPPA/NR4A3/OPA1/PDK4/PID1/PIK3CA/PLN/PRKCD/PRKCQ/PTPN1/PTPN11/PTPRA/PTPRE/PXN/QDPR/RANGAP1/RELA/RETN/RHOQ/SHC1/SLC2A1/SOCS1/SOCS2/SORBS1/SORT1/SOS1/SP1/SP…	78
GO:0003073	regulation of systemic arterial blood pressure	27/1842	83/17913	2.90465e-08	1.30291e-06	8.96644e-07	ACE/ACE2/ADRB1/AGT/AGTR1/AGTR2/AR/CORIN/CTSG/CYBA/CYP11B2/EDN1/EDN2/F2R/F2RL1/GJA1/MECP2/MME/NAV2/NOS3/PDE4D/POSTN/RHOA/SLC4A5/SUCNR1/TNNI3/TPM1	27
GO:0001990	regulation of systemic arterial blood pressure by hormone	17/1842	37/17913	3.17493e-08	1.41344e-06	9.72709e-07	ACE/ACE2/AGT/AGTR1/AGTR2/CORIN/CTSG/CYBA/CYP11B2/EDN1/EDN2/F2R/F2RL1/MME/NOS3/RHOA/SUCNR1	17
GO:0055119	relaxation of cardiac muscle	11/1842	16/17913	3.53583e-08	1.56236e-06	1.07519e-06	ATP1A1/ATP1A2/ATP1B1/ATP2A2/HRC/KCNJ2/PDE4D/PDE5A/PLN/RGS2/SLC8A1	11
GO:0035637	multicellular organismal signaling	46/1842	193/17913	3.86738e-08	1.69621e-06	1.1673e-06	ACE2/AGT/ATP1A1/ATP1A2/ATP1A3/ATP1B1/ATP1B3/ATP2A2/ATP2B4/CACNA1C/CACNA2D1/CACNA2D3/CACNB2/CALM2/CASQ1/CORIN/CTNNA3/CXADR/DMPK/DSP/FGF12/FMR1/GJA1/HCN4/HRC/ITPR1/ITPR3/KCNA5/KCNIP2/KCNJ2/KCNJ4/MIR1-1/MYH14/NKX2-5/NPPA/PDE4D/PLN/RNF207/RYR2/SCN10A/SCN2B/SCN5A/SLC8A1/TMEM65/TNNI3K/ZMPSTE24	46
GO:0033673	negative regulation of kinase activity	54/1842	244/17913	4.01728e-08	1.74899e-06	1.20363e-06	AJUBA/AKT1/APOE/CASP3/CAV3/CDKN1A/CDKN1C/DBNDD2/DTNBP1/DUSP1/DUSP16/DUSP26/ERRFI1/GADD45A/GADD45B/GNAQ/HEG1/HYAL2/IGF1R/INPP5K/IPO5/IRAK3/LRP5/LYN/MIDN/MIR133A1/MIR133A2/MIR20A/MVP/MYOCD/PIK3IP1/PPM1F/PPP2CA/PPP2R5A/PRKAG2/PRKCD/PTPN1/RGN/RGS2/RGS3/RGS4/SFRP1/SMCR8/SMPD1/SOCS1/SPRED2/TESC/THY1/TRIB1/TRIM27/UCHL1/WARS/WWTR1/YWHAG	54
GO:0032386	regulation of intracellular transport	77/1842	400/17913	4.05537e-08	1.75269e-06	1.20617e-06	ACTN2/AGTR2/ANXA2/ARHGAP1/ATG13/ATP13A2/ATP2A2/B3GAT3/BACE1/BAG3/CACNB2/CAMK2A/CRYAB/DNM1L/DTNBP1/EHD2/FBXW7/FCER1G/FES/FGR/FMR1/FYN/GAB2/GATA2/GLI3/GRASP/GSK3B/HCLS1/HDAC3/HRAS/HYAL2/INPP5F/INPP5K/IPO5/ITGB2/LCP1/LEP/LYN/MAP1B/MAP2/MAP2K1/MAP2K2/MDFIC/MFF/MSN/MYBPC3/MYLK2/NPPA/NUMA1/NUP214/PDCD5/PKIG/PLN/PRKCD/PTPN1/PTPN11/PTPN14/RAB3A/RAC2/RANGAP1/RHOT1/SAE1/SCP2/SMAD3/SUPT6H/TBC1D20/TGFB1/TMEM…	77
GO:0072001	renal system development	61/1842	291/17913	4.53835e-08	1.94722e-06	1.34004e-06	ACAT1/ACE/AGT/AGTR1/AGTR2/ARID5B/BCL2/CDKN1C/COL4A1/CRLF1/CTNNB1/DCHS1/DLG5/EGR1/FAT4/FBN1/GLI3/GPR4/GZF1/HEYL/HYAL2/ID3/IFT140/IRX2/IRX3/ITGB4/KANK2/KCNJ8/KLHL3/MEF2C/MME/MYC/MYO1E/MYOCD/NID1/OSR1/PDGFRA/PDGFRB/PECAM1/PKD2/PLCE1/PROM1/PROX1/RDH10/RGN/SEC61A1/SERPINF1/SFRP1/SGPL1/SLIT2/SMAD3/SOX4/SULF1/SULF2/TGFB1/TGFB2/TIPARP/TRAF3IP1/WWTR1/YAP1/ZMPSTE24	61
GO:0009108	coenzyme biosynthetic process	54/1842	245/17913	4.6467e-08	1.97936e-06	1.36216e-06	ACACB/ACAT1/ACSL3/ACSS2/ALDOA/ALDOC/BPGM/COQ2/COQ3/COQ4/COQ6/COQ7/COQ8A/COQ9/DDIT4/DLD/ENO1/ENO3/FASN/GALK1/GCDH/GPI/HAAO/HDAC4/IDH2/IGF1/LDHA/METTL16/MLYCD/MOCS2/MPC2/NADK/NADK2/NAMPT/NNMT/NUP188/NUP214/NUPR1/PANK3/PDHA1/PDHB/PDK4/PDSS1/PDSS2/PFKL/PFKM/PGAM2/POM121C/PRKAG2/RFK/SCD/SNCA/STAT3/TP53	54
GO:0086004	regulation of cardiac muscle cell contraction	18/1842	42/17913	4.77864e-08	2.02103e-06	1.39084e-06	ATP1A1/ATP1A2/ATP2A2/CACNA1C/CAV3/CTNNA3/DSP/GATA4/HCN4/KCNJ2/MIR1-1/MIR133A1/MIR133A2/PDE4D/PLN/RNF207/RYR2/SCN5A	18
GO:0042391	regulation of membrane potential	73/1842	374/17913	5.07996e-08	2.13322e-06	1.46805e-06	ACTN2/ADRB1/AKT1/APP/ATP1A1/ATP1A2/ATP1A3/ATP1B1/ATP1B3/ATP2A2/BCL2/BCO2/BNIP3/CACNA1C/CACNA2D1/CACNB2/CAV3/CHCHD10/CLIC1/CLN3/CTNNA3/CXADR/DLD/DMPK/DSP/EDN1/FGF12/FHL1/FMR1/GABRB1/GJA1/GLRB/GOT1/GPD1L/GRIA3/GRM1/GSK3B/HCN4/JUN/KCNA5/KCNE4/KCNIP2/KCNJ2/KCNJ8/KCTD7/MECP2/MEF2C/MIR1-1/MIR133A1/MIR133A2/MLLT11/MYH14/NLGN4X/NNT/NPPA/PIAS3/PID1/PLN/PTPN3/RGS4/RNF207/RYR2/SCN10A/SCN2B/SCN5A/SLC8A1/SLMA…	73
GO:0051348	negative regulation of transferase activity	58/1842	272/17913	5.16782e-08	2.15483e-06	1.48292e-06	AJUBA/AKT1/APOE/BAG5/CASP3/CAV3/CDKN1A/CDKN1C/DBNDD2/DTNBP1/DUSP1/DUSP16/DUSP26/ERRFI1/GADD45A/GADD45B/GNAQ/GSK3B/HEG1/HYAL2/IGF1R/INPP5K/IPO5/IRAK3/LRP5/LYN/MIDN/MIR133A1/MIR133A2/MIR20A/MVP/MYOCD/PIK3IP1/PPM1F/PPP2CA/PPP2R5A/PRKAG2/PRKCD/PTPN1/RGN/RGS2/RGS3/RGS4/SFRP1/SMCR8/SMPD1/SOCS1/SPRED2/TESC/THY1/TP53/TRIB1/TRIM27/UCHL1/WARS/WWTR1/YWHAG/ZFP36	58
GO:0086002	cardiac muscle cell action potential involved in contraction	21/1842	56/17913	6.18213e-08	2.55975e-06	1.76158e-06	ATP1A1/CACNA1C/CACNA2D1/CACNB2/CAV3/CTNNA3/DSP/FGF12/GJA1/GPD1L/KCNA5/KCNE4/KCNJ2/KCNJ8/MIR1-1/MIR133A1/MIR133A2/RNF207/RYR2/SCN2B/SCN5A	21
GO:0046677	response to antibiotic	66/1842	328/17913	6.73199e-08	2.76806e-06	1.90494e-06	ACTC1/ADCY3/ADCY6/AIFM1/ALPL/ATP7A/AXL/BCL2/BNIP3/CA3/CASP3/CBL/CCND1/CD14/CRYAB/CYBB/CYP1B1/DUSP1/EDN1/EGR1/EHMT1/ENDOG/FDX1/FOXO1/FXN/FYN/GSN/HAMP/HYAL2/ID1/ID3/IL6/IMPACT/JAK2/JUN/KCNA5/KDM5B/KDM6B/KLF2/KLF4/LEP/MAOB/MB/MEF2C/MIR133A1/MIR133A2/NR4A3/OPA1/OXCT1/PDGFRB/PENK/PRKCD/RELA/RGS2/RGS4/RHOA/S100A8/SETD7/SIRPA/SLC8A1/SPARC/STAT3/TNC/TP53/USP46/ZC3H12A	66
GO:0072507	divalent inorganic cation homeostasis	78/1842	412/17913	6.90656e-08	2.82026e-06	1.94086e-06	AGT/AGTR1/ANXA2/APOE/APP/ATP13A2/ATP1A2/ATP1B1/ATP2A2/ATP2B4/BCL2/BNIP3/C1QTNF1/CACNA1C/CACNA2D1/CACNB2/CALM2/CASQ1/CAV3/CCL11/CLN3/CORO1A/CSRP3/CYBA/DDIT3/DIAPH1/DMPK/EDN1/EDN2/EDNRA/ESR1/F2R/F2RL1/FYN/GATA2/GJA1/GNA15/GOT1/GRM1/HRC/HTT/ITPR1/ITPR3/JAK2/JPH2/KCNA5/KCTD17/LYN/MICU2/MIR1-1/MIR133A1/MIR133A2/PDE4D/PDGFRA/PIK3CG/PKD2/PLCE1/PLN/RGN/RYR2/S100A8/S100A9/S1PR3/SGCD/SLC30A1/SLC30A2/SLC30A…	78
GO:0006469	negative regulation of protein kinase activity	50/1842	222/17913	7.05115e-08	2.85958e-06	1.96792e-06	AKT1/APOE/CASP3/CAV3/CDKN1A/CDKN1C/DBNDD2/DTNBP1/DUSP1/DUSP16/DUSP26/ERRFI1/GADD45A/GADD45B/GNAQ/HEG1/HYAL2/IGF1R/INPP5K/IPO5/IRAK3/LRP5/LYN/MIR133A1/MIR133A2/MIR20A/MVP/MYOCD/PPM1F/PPP2CA/PRKAG2/PRKCD/PTPN1/RGN/RGS2/RGS3/RGS4/SFRP1/SMCR8/SMPD1/SOCS1/SPRED2/TESC/THY1/TRIB1/TRIM27/UCHL1/WARS/WWTR1/YWHAG	50
GO:0043409	negative regulation of MAPK cascade	43/1842	179/17913	8.3641e-08	3.36897e-06	2.31847e-06	AKT1/APOE/ATF3/CAV3/CYLD/DUSP1/DUSP16/DUSP26/EMILIN1/ERRFI1/F2RL1/FOXO1/HDAC3/HYAL2/IGF1R/INPP5K/IRAK3/KLF4/KLHL31/LYN/MIR133A1/MIR133A2/MIR20A/MIR221/MYC/PPP2CA/PRKCD/PTPN1/PTPRR/RAPGEF1/RGS2/RGS3/RGS4/SFRP1/SH3RF2/SIRPA/SMPD1/SPRED2/SPRY4/TNIP1/UCHL1/WNK2/ZMYND11	43
GO:0030308	negative regulation of cell growth	41/1842	167/17913	8.75032e-08	3.50072e-06	2.40914e-06	AGT/AGTR2/APBB2/BCL11A/BCL2/BCL6/BMP10/BST2/CAV3/CCAR2/CDKN1A/CRYAB/DCBLD2/DCUN1D3/ENO1/FHL1/FRZB/GJA1/HYAL2/MAP2/MSX1/MYL2/NPPA/NPPB/PPP1R9B/PPP2CA/RERG/RGS2/RGS4/RTN4/SERPINE2/SFRP1/SLIT2/SMAD3/SMARCA4/SPP1/TGFB1/TGFB2/TP53/TSPYL2/ULK2	41
GO:0006733	oxidoreduction coenzyme metabolic process	45/1842	192/17913	9.19574e-08	3.65423e-06	2.51478e-06	ALDOA/ALDOC/BPGM/COQ2/COQ3/COQ4/COQ6/COQ7/COQ8A/COQ9/DDIT4/DLD/ENO1/ENO3/GALK1/GPD1L/GPD2/GPI/HAAO/HDAC4/IDH2/IGF1/LDHA/MDH1/MDH2/MPC2/NADK/NADK2/NAMPT/NNMT/NUP188/NUP214/NUPR1/PDHA1/PDHB/PDSS1/PDSS2/PFKL/PFKM/PGAM2/POM121C/PRKAG2/STAT3/TKT/TP53	45
GO:0055010	ventricular cardiac muscle tissue morphogenesis	19/1842	48/17913	9.52307e-08	3.75907e-06	2.58693e-06	BMP10/DSP/HEG1/HEY2/MYBPC3/MYH6/MYH7/MYL2/MYL3/NKX2-5/PROX1/RYR2/TGFB1/TGFB2/TGFBR3/TNNC1/TNNI3/TNNT2/TPM1	19
GO:0032409	regulation of transporter activity	55/1842	257/17913	1.0009e-07	3.92473e-06	2.70094e-06	ACTB/ACTN2/AHNAK/APP/ATP1A2/ATP1B1/ATP1B3/ATP7A/BCL2/CACNA2D1/CACNB2/CALM2/CAPN1/CASQ1/CAV3/CCL2/CHCHD10/CTTNBP2NL/FGF12/FHL1/FMR1/GJA1/GPD1L/GRIA3/HRC/HSPA2/HTT/JPH2/KCNAB1/KCNIP2/KCTD7/KLHL24/KMT2A/MEF2C/MIR1-1/MIR133A1/MIR133A2/NDFIP2/NPPA/OSR1/PDE4D/PKD2/PLN/PRKCD/PTPN3/RGN/RNF207/RYR2/SCN2B/SLMAP/SNCA/TESC/WNK2/WWP2/YWHAH	55
GO:0006874	cellular calcium ion homeostasis	72/1842	375/17913	1.23816e-07	4.82311e-06	3.31919e-06	AGT/AGTR1/ANXA2/APOE/APP/ATP13A2/ATP1A2/ATP1B1/ATP2A2/ATP2B4/BCL2/BNIP3/C1QTNF1/CACNA1C/CACNA2D1/CACNB2/CALM2/CASQ1/CAV3/CCL11/CLN3/CORO1A/CSRP3/CYBA/DDIT3/DIAPH1/DMPK/EDN1/EDN2/EDNRA/ESR1/F2R/F2RL1/FYN/GATA2/GJA1/GNA15/GOT1/GRM1/HRC/HTT/ITPR1/ITPR3/JAK2/JPH2/KCNA5/KCTD17/LYN/MICU2/MIR1-1/MIR133A1/MIR133A2/PDE4D/PDGFRA/PIK3CG/PKD2/PLCE1/PLN/RGN/RYR2/S1PR3/SLC30A1/SLC8A1/SMAD3/SNCA/SWAP70/SYNPO/TG…	72
GO:0044282	small molecule catabolic process	76/1842	404/17913	1.32973e-07	5.14598e-06	3.54138e-06	ABCD3/ABHD10/ACAA1/ACAA2/ACACB/ACADVL/ACAT1/ACOT8/ACOX2/ACOX3/ADHFE1/AIG1/AKT1/ALDH2/ALDH5A1/ALDOA/ALDOC/APOBEC2/ATP2B4/BCAT2/BCKDHB/BDH1/BPGM/CD44/CEL/CPT1B/CRYM/DECR1/DLD/ECI2/EHHADH/ENO1/ENO3/ENTPD1/ENTPD6/ETFB/ETFDH/FAH/GALK1/GCDH/GLB1/GOT1/GPD2/GPI/GPT/HAAO/HADHB/HIBADH/HSD17B10/HSD17B4/HYAL2/IDUA/INPP5K/LEP/LRP5/LYVE1/MCCC2/MLYCD/NOS3/NUDT9/OXCT1/OXCT2/PCCA/PFKL/PFKM/PGAM2/PLA2G15/PLIN5/PNK…	76
GO:0003208	cardiac ventricle morphogenesis	24/1842	73/17913	1.34644e-07	5.15538e-06	3.54785e-06	BMP10/DSP/GATA4/HEG1/HEY2/HEYL/MEF2C/MYBPC3/MYH6/MYH7/MYL2/MYL3/NKX2-5/PROX1/RYR2/SOX4/TBX5/TGFB1/TGFB2/TGFBR3/TNNC1/TNNI3/TNNT2/TPM1	24
GO:0009060	aerobic respiration	23/1842	68/17913	1.35828e-07	5.15538e-06	3.54785e-06	BNIP3/COX10/COX15/COX5A/COX6B1/COX8A/DLD/FAHD1/FH/FXN/IDH2/MDH2/ME3/NNT/PDHA1/PDHB/SDHA/SDHD/SHMT2/SUCLA2/SUCLG1/SURF1/UQCRC1	23
GO:1903524	positive regulation of blood circulation	23/1842	68/17913	1.35828e-07	5.15538e-06	3.54785e-06	ACE2/ADRB1/AKT1/ATP1A1/ATP2A2/EDN1/EDN2/F2R/F2RL1/GJA1/HEY2/HRC/MIR1-1/NKX2-5/NPPA/PDE4D/RGS2/RGS4/RHOA/RNF207/RYR2/TGFB2/TPM1	23
GO:0010882	regulation of cardiac muscle contraction by calcium ion signaling	14/1842	28/17913	1.40116e-07	5.28425e-06	3.63654e-06	ATP1A2/ATP1B1/CACNA1C/CALM2/HDAC4/HRC/MIR1-1/MIR133A1/MIR133A2/PLN/RYR2/SLC8A1/TMEM38B/TNNI3	14
GO:0006979	response to oxidative stress	81/1842	442/17913	1.64628e-07	6.16939e-06	4.24567e-06	ACOX2/AIF1/AIFM1/AKT1/APOE/APP/ATP13A2/ATP2A2/ATP7A/AXL/BAG5/BCL2/BNIP3/CA3/CAMKK2/CASP3/CRYAB/CTNNB1/CYBA/CYBB/CYCS/CYP1B1/DUSP1/EDN1/ENDOG/ETFDH/FBXW7/FOS/FOXO1/FXN/FYN/GATA4/GPX8/GSS/HYAL2/IL6/IMPACT/JAK2/JUN/KCNA5/KDM6B/KLF2/KLF4/LONP1/MB/MGST1/MIR133A1/MIR133A2/MMP2/MMP3/NDUFA12/NDUFS2/NDUFS8/NOS3/NOX4/NR4A3/PDGFRA/PDGFRB/PENK/PKD2/PLA2R1/PRDX6/PRKCD/PRKRA/PXDN/PXDNL/PXN/RBPMS/RELA/RGN/RWDD1…	81
GO:0003206	cardiac chamber morphogenesis	34/1842	129/17913	1.78096e-07	6.63213e-06	4.56413e-06	BMP10/CAV3/DSP/FZD2/GATA4/GATA6/HEG1/HEY2/HEYL/MEF2C/MIR1-1/MYBPC3/MYH6/MYH7/MYL2/MYL3/NKX2-5/NOS3/NOTCH2/PARVA/PROX1/RYR2/SLIT2/SOS1/SOX4/TBX5/TGFB1/TGFB2/TGFBR3/TNNC1/TNNI3/TNNT2/TP53/TPM1	34
GO:0060419	heart growth	31/1842	112/17913	1.87411e-07	6.93539e-06	4.77282e-06	ACACB/AGT/AGTR2/ARID2/BMP10/CAV3/EDN1/GATA4/GATA6/GJA1/HAMP/HEG1/HEY2/IGF1/MEF2C/MEIS1/MIR1-1/MIR590/MYH6/NKX2-5/NPPA/PDLIM5/PIM1/PROX1/RGS2/RGS4/SORBS2/TBX5/TGFB2/TGFBR3/YAP1	31
GO:0086009	membrane repolarization	19/1842	50/17913	2.04997e-07	7.53905e-06	5.18826e-06	ATP1A1/ATP1A2/ATP1B1/ATP1B3/CACNA2D1/CAV3/GJA1/KCNA5/KCNE4/KCNIP2/KCNJ2/KCNJ8/MIR1-1/MIR133A1/MIR133A2/NPPA/RNF207/SCN5A/ZMPSTE24	19
GO:0006744	ubiquinone biosynthetic process	9/1842	12/17913	2.08003e-07	7.55576e-06	5.19975e-06	COQ2/COQ3/COQ4/COQ6/COQ7/COQ8A/COQ9/PDSS1/PDSS2	9
GO:1901663	quinone biosynthetic process	9/1842	12/17913	2.08003e-07	7.55576e-06	5.19975e-06	COQ2/COQ3/COQ4/COQ6/COQ7/COQ8A/COQ9/PDSS1/PDSS2	9
GO:0031532	actin cytoskeleton reorganization	26/1842	85/17913	2.09739e-07	7.56644e-06	5.2071e-06	ARAP1/ARHGDIA/ARHGDIB/AUTS2/CDC42BPB/CXADR/DAPK3/DTNBP1/FES/FGF7/GSN/HCK/HCLS1/HRAS/MYH9/NOTCH2/PDGFRA/PHACTR1/PLEK/PTPN1/RALA/RAP2A/RHOA/SHC1/SIPA1L1/TGFB1	26
GO:0001822	kidney development	57/1842	276/17913	2.10853e-07	7.56644e-06	5.2071e-06	ACAT1/ACE/AGT/AGTR1/AGTR2/ARID5B/BCL2/CDKN1C/CRLF1/CTNNB1/DCHS1/DLG5/EGR1/FAT4/FBN1/GLI3/GPR4/GZF1/HEYL/HYAL2/ID3/IRX2/IRX3/KANK2/KCNJ8/KLHL3/MEF2C/MME/MYC/MYO1E/NID1/OSR1/PDGFRA/PDGFRB/PECAM1/PKD2/PLCE1/PROM1/PROX1/RDH10/RGN/SEC61A1/SERPINF1/SFRP1/SGPL1/SLIT2/SMAD3/SOX4/SULF1/SULF2/TGFB1/TGFB2/TIPARP/TRAF3IP1/WWTR1/YAP1/ZMPSTE24	57
GO:1902905	positive regulation of supramolecular fiber organization	43/1842	185/17913	2.25894e-07	8.05733e-06	5.54492e-06	ACTN2/APOA1/APOE/APP/ARPC1B/ARPC3/BMP10/CAV3/CCL11/CORO1A/CYFIP1/DCTN1/EDN1/F2RL1/FCHSD2/FES/GSN/HCK/ID1/IQGAP2/LMOD2/MAP1B/MECP2/MIR1-1/MYLK3/NAV3/NCK2/NOX4/NUMA1/PLEK/PPM1F/PROX1/PXN/RHOA/S100A10/SFRP1/SMAD3/SWAP70/SYNPO2L/TGFB3/TPM1/TRIM27/WAS	43
GO:0055074	calcium ion homeostasis	73/1842	388/17913	2.33089e-07	8.2642e-06	5.68729e-06	AGT/AGTR1/ANXA2/APOE/APP/ATP13A2/ATP1A2/ATP1B1/ATP2A2/ATP2B4/BCL2/BNIP3/C1QTNF1/CACNA1C/CACNA2D1/CACNB2/CALM2/CASQ1/CAV3/CCL11/CLN3/CORO1A/CSRP3/CYBA/DDIT3/DIAPH1/DMPK/EDN1/EDN2/EDNRA/ESR1/F2R/F2RL1/FYN/GATA2/GJA1/GNA15/GOT1/GRM1/HRC/HTT/ITPR1/ITPR3/JAK2/JPH2/KCNA5/KCTD17/LYN/MICU2/MIR1-1/MIR133A1/MIR133A2/PDE4D/PDGFRA/PIK3CG/PKD2/PLCE1/PLN/RGN/RYR2/S1PR3/SGCD/SLC30A1/SLC8A1/SMAD3/SNCA/SWAP70/SYN…	73
GO:0034765	regulation of ion transmembrane transport	82/1842	453/17913	2.36846e-07	8.3474e-06	5.74455e-06	ACTN2/AGT/AHNAK/AKT1/APP/ATP1A2/ATP1B1/ATP1B3/ATP2B4/ATP7A/CACNA1C/CACNA2D1/CACNA2D3/CACNB2/CALM2/CAPN1/CASQ1/CAV3/CCL2/CHCHD10/CLIC1/CLIC6/CORO1A/CYBA/CYBB/DIAPH1/F2R/FGF12/FHL1/FMR1/FYN/GJA1/GPD1L/GRIA3/HCN4/HRC/HSPA2/HTT/JPH2/KCNA5/KCNAB1/KCNC4/KCNIP2/KCNJ2/KCNJ4/KCNJ8/KCNK12/KLHL24/LYN/MEF2C/MIR1-1/MIR133A1/MIR133A2/NPPA/OSR1/PDE4D/PIK3CG/PKD2/PLN/PTPN3/RGN/RGS2/RGS4/RNF207/RYR2/SCN10A/SCN2B/…	82
GO:0014909	smooth muscle cell migration	27/1842	91/17913	2.46234e-07	8.62692e-06	5.93691e-06	ACE/AGT/AIF1/ATP7A/BCL2/DDR1/DOCK4/FOXO4/HDAC4/IGF1/IGFBP3/IGFBP5/MEF2C/MIR20A/MIR221/MIR451A/MYOCD/NOX4/NR4A3/PARVA/PDGFRB/PLAU/POSTN/SERPINE1/SLIT2/TPM1/TRIB1	27
GO:0051924	regulation of calcium ion transport	52/1842	244/17913	2.54572e-07	8.86659e-06	6.10184e-06	AGT/AHNAK/ATP1A2/ATP1B1/BCL2/CACNA1C/CACNA2D1/CACNB2/CALM2/CAMK2A/CASQ1/CAV3/CCL2/CORO1A/CTNNB1/CXCR4/CYBA/DIAPH1/EGF/F2R/FMR1/FYN/GJA1/HRC/HSPA2/HTT/INPP5K/JPH2/LGALS3/LILRA5/LYN/MIR1-1/MIR133A1/MIR133A2/NOS3/NPPA/PDE4D/PDGFRB/PIK3CG/PKD2/PLN/RGN/RGS4/RHOA/RYR2/SLC30A1/SLC8A1/SNCA/TGFB1/THY1/TMEM38B/TRIM27	52
GO:0099622	cardiac muscle cell membrane repolarization	17/1842	42/17913	3.07508e-07	1.06477e-05	7.32758e-06	ATP1A1/ATP1B1/CACNA2D1/CAV3/GJA1/KCNA5/KCNE4/KCNIP2/KCNJ2/KCNJ8/MIR1-1/MIR133A1/MIR133A2/NPPA/RNF207/SCN5A/ZMPSTE24	17
GO:0097191	extrinsic apoptotic signaling pathway	47/1842	213/17913	3.27325e-07	1.1268e-05	7.75443e-06	AGT/AGTR2/AKT1/AR/ARHGEF2/ATF3/BAG3/BCL2/CASP3/CYLD/DAPK3/FEM1B/FYN/G0S2/GSK3B/HIPK1/HMGB2/HTT/HYAL2/IGF1/JAK2/KRT8/LGALS3/LMNA/LTBR/MAP2K5/MIR221/MLLT11/NOS3/RAF1/RELA/SERPINE1/SFRP1/SH3RF1/SKIL/SMAD3/SORT1/STRADB/TGFB1/TGFB2/THBS1/TMBIM1/TNFRSF1A/UNC5B/YAP1/ZC3HC1/ZMYND11	47
GO:0006635	fatty acid beta-oxidation	22/1842	66/17913	3.38702e-07	1.15922e-05	7.97758e-06	ABCD3/ACAA1/ACAA2/ACACB/ACADVL/ACOT8/ACOX2/ACOX3/AKT1/CPT1B/DECR1/ECI2/EHHADH/ETFB/ETFDH/GCDH/HADHB/HSD17B4/LEP/MLYCD/PLIN5/SCP2	22
GO:0008217	regulation of blood pressure	40/1842	169/17913	3.55533e-07	1.20983e-05	8.32588e-06	ACE/ACE2/ADRB1/AGT/AGTR1/AGTR2/AGTRAP/AR/ATP1A1/ATP1A2/CORIN/CTSG/CYBA/CYP11B1/CYP11B2/EDN1/EDN2/EDNRA/F2R/F2RL1/GJA1/LEP/LRP5/MECP2/MME/MYH6/NAMPT/NAV2/NOS3/NPPA/NPPB/NPR3/PDE4D/POSTN/RHOA/SLC4A5/SMAD3/SUCNR1/TNNI3/TPM1	40
GO:0017004	cytochrome complex assembly	13/1842	26/17913	3.95446e-07	1.33036e-05	9.15533e-06	BCS1L/COA6/COX10/COX14/COX15/COX16/COX20/CYBA/LYRM7/SCO1/SCO2/SURF1/TIMM21	13
GO:0086010	membrane depolarization during action potential	13/1842	26/17913	3.95446e-07	1.33036e-05	9.15533e-06	ATP1A2/CACNA1C/CACNA2D1/CACNB2/CAV3/HCN4/KCNJ2/PTPN3/SCN2B/SCN5A/SLC8A1/SLMAP/YWHAH	13
GO:0031667	response to nutrient levels	83/1842	466/17913	4.04241e-07	1.35227e-05	9.30609e-06	ACACB/ACAT1/ACSL3/ADRB1/ADSSL1/AGL/AIFM1/AKT1/ALPL/APOA1/APOE/ATF3/BCL11A/BCL2/BMP8A/CBL/CCND1/CD68/CDKN1A/CHSY1/CYBA/CYBB/DDIT3/DNM1L/EIF2AK3/FAM107A/FES/FOXO1/FOXO4/FYN/GATA4/GDF15/GNPAT/GSN/GSS/HAMP/HIGD1A/HSPA8/IFI16/IMPACT/JUN/KANK2/KLF10/LAMP2/LDLR/LEP/LIPG/MAP1B/MTHFR/MTMR3/NAMPT/NNT/OMA1/OPA1/OXCT1/PDK4/PENK/PIM1/POSTN/PPM1D/PROX1/RELA/RMI1/RNF152/SFRP1/SGIP1/SLC16A1/SLC2A1/SLC38A2/SLC8A1…	83
GO:0003205	cardiac chamber development	40/1842	170/17913	4.19439e-07	1.39523e-05	9.60171e-06	BMP10/CAV3/DSP/FZD2/GATA4/GATA6/HEG1/HEY2/HEYL/MAML1/MEF2C/MIR1-1/MYBPC3/MYH6/MYH7/MYL2/MYL3/MYOCD/NKX2-5/NOS3/NOTCH2/PARVA/PROX1/RYR2/SCN5A/SLIT2/SOS1/SOX4/TBX5/TGFB1/TGFB2/TGFBR3/TMEM65/TNNC1/TNNI3/TNNT2/TP53/TPM1/XIRP2/ZMPSTE24	40
GO:0051480	regulation of cytosolic calcium ion concentration	58/1842	289/17913	4.53892e-07	1.49986e-05	1.03218e-05	AGT/AGTR1/ANXA2/ATP1A2/ATP2B4/BCL2/C1QTNF1/CACNA1C/CACNA2D1/CACNB2/CALM2/CASQ1/CAV3/CLN3/CORO1A/CYBA/DDIT3/DIAPH1/EDN1/EDN2/EDNRA/ESR1/F2R/F2RL1/FYN/GATA2/GJA1/GNA15/GOT1/GRM1/HRC/HTT/ITPR1/ITPR3/JAK2/JPH2/KCNA5/LYN/MIR1-1/MIR133A1/MIR133A2/PDE4D/PDGFRA/PIK3CG/PKD2/PLCE1/PLN/RYR2/S1PR3/SLC8A1/SMAD3/SNCA/SWAP70/SYNPO/TGFB1/THY1/TMEM178A/TMEM38B	58
GO:0008535	respiratory chain complex IV assembly	11/1842	19/17913	4.5596e-07	1.49986e-05	1.03218e-05	BCS1L/COA6/COX10/COX14/COX15/COX16/COX20/SCO1/SCO2/SURF1/TIMM21	11
GO:0071375	cellular response to peptide hormone stimulus	59/1842	297/17913	5.18547e-07	1.69631e-05	1.16737e-05	ACTN2/ADCY3/ADCY4/ADCY6/AGT/AGTR1/AGTR2/AGTRAP/AKT1/ARID1B/ATP6V0E2/CAMK2A/CSRP3/CYBA/CYFIP1/EDN1/ERRFI1/FBN1/FOXO1/FOXO4/FYN/GDF15/GOT1/GPR173/GRB10/GRB14/IGF1R/IGFBP1/INPP5K/JAK2/LEP/LYN/MAP1B/NR4A3/OPA1/PDK4/PID1/PIK3CA/PRKCD/PRKCQ/PTPN1/PTPN11/PTPRA/PTPRE/PXN/RANGAP1/RELA/RHOQ/SHC1/SOCS1/SOCS2/SORBS1/SOS1/SP1/STAT3/STAT5B/TGFB1/XBP1/YWHAG	59
GO:0051279	regulation of release of sequestered calcium ion into cytosol	24/1842	78/17913	5.40358e-07	1.75795e-05	1.20979e-05	ATP1A2/CACNA1C/CALM2/CASQ1/CORO1A/CYBA/DIAPH1/F2R/HRC/HTT/JPH2/LYN/MIR1-1/MIR133A1/MIR133A2/PDE4D/PKD2/PLN/RYR2/SLC8A1/SNCA/TGFB1/THY1/TMEM38B	24
GO:0014741	negative regulation of muscle hypertrophy	16/1842	39/17913	5.5026e-07	1.77894e-05	1.22424e-05	ATP2B4/BMP10/CAV3/ERRFI1/FOXO1/IGFBP5/LMNA/MIR1-1/MIR133A1/MIR133A2/MLIP/RGS2/RGS4/SMAD3/TNFRSF1A/TRIM63	16
GO:2001235	positive regulation of apoptotic signaling pathway	41/1842	178/17913	5.5282e-07	1.77894e-05	1.22424e-05	AGT/AGTR2/ATF3/BCL2/BNIP3/CHCHD10/CTSC/CYLD/DAPK3/DDIT3/DNM1L/FBXW7/G0S2/GSK3B/GSN/HYAL2/JAK2/LTBR/MFF/MLLT11/MSX1/NCK2/NUPR1/PDCD5/PLEKHF1/PRKCD/PRKRA/S100A8/S100A9/SERINC3/SFRP1/SKIL/SMAD3/THBS1/TP53/TP53BP2/TPD52L1/TRAF7/YWHAG/YWHAH/YWHAQ	41
GO:0006743	ubiquinone metabolic process	9/1842	13/17913	6.13908e-07	1.95427e-05	1.3449e-05	COQ2/COQ3/COQ4/COQ6/COQ7/COQ8A/COQ9/PDSS1/PDSS2	9
GO:0014745	negative regulation of muscle adaptation	9/1842	13/17913	6.13908e-07	1.95427e-05	1.3449e-05	ATP2B4/ERRFI1/FOXO1/IGFBP5/KLF4/LMNA/MLIP/NOS3/SMAD3	9
GO:0008360	regulation of cell shape	32/1842	124/17913	6.77582e-07	2.14543e-05	1.47645e-05	ALDOA/ARAP1/ARHGAP35/ARHGEF18/CCL11/CCL2/CDC42EP4/CORO1A/CYFIP1/DAPK3/DIAPH1/DNMBP/FES/FGD2/FGD5/FGR/FMNL3/FN1/FYN/HCK/ITGB2/MSN/MYH14/MYH9/PALM/PARVA/PLXNB2/S100A13/SH3KBP1/STRIP2/TPM1/ZMPSTE24	32
GO:0006099	tricarboxylic acid cycle	13/1842	27/17913	6.90782e-07	2.1756e-05	1.49721e-05	DLD/FAHD1/FH/IDH2/MDH2/ME3/NNT/PDHA1/PDHB/SDHA/SDHD/SUCLA2/SUCLG1	13
GO:0014743	regulation of muscle hypertrophy	24/1842	79/17913	7.011e-07	2.19641e-05	1.51153e-05	AGT/ATP2B4/BMP10/CAV3/EDN1/ERRFI1/FOXO1/HAMP/IGF1/IGFBP5/LMCD1/LMNA/MIR1-1/MIR133A1/MIR133A2/MIR20A/MLIP/NR4A3/PDE5A/RGS2/RGS4/SMAD3/TNFRSF1A/TRIM63	24
GO:0050879	multicellular organismal movement	18/1842	49/17913	7.71287e-07	2.39099e-05	1.64544e-05	ATP2A2/CASQ1/CAV3/COMP/DMPK/GAA/HIPK2/ITPR1/KCNJ2/MAP1A/MB/MYH14/MYH7/TCAP/TNNC1/TNNI2/TNNT1/TNNT3	18
GO:0050881	musculoskeletal movement	18/1842	49/17913	7.71287e-07	2.39099e-05	1.64544e-05	ATP2A2/CASQ1/CAV3/COMP/DMPK/GAA/HIPK2/ITPR1/KCNJ2/MAP1A/MB/MYH14/MYH7/TCAP/TNNC1/TNNI2/TNNT1/TNNT3	18
GO:0014910	regulation of smooth muscle cell migration	25/1842	85/17913	8.15416e-07	2.51308e-05	1.72946e-05	ACE/AGT/AIF1/ATP7A/BCL2/DOCK4/FOXO4/HDAC4/IGF1/IGFBP3/IGFBP5/MEF2C/MIR20A/MIR221/MIR451A/MYOCD/NOX4/NR4A3/PDGFRB/PLAU/POSTN/SERPINE1/SLIT2/TPM1/TRIB1	25
GO:0035304	regulation of protein dephosphorylation	34/1842	137/17913	8.2353e-07	2.51308e-05	1.72946e-05	AGTR2/B3GAT3/BOD1/CALM2/CDCA2/DMPK/DUSP26/GSK3B/HTT/IGFBP3/JAK2/LGALS3/MASTL/NUAK1/PDGFRB/PHACTR1/PPP1R14B/PPP1R1A/PPP1R1C/PPP1R26/PPP1R3C/PPP1R9B/PPP2R2A/PPP2R3B/PPP2R5A/PPP2R5C/PRKCD/RGN/SH3RF2/SHOC2/SLC39A10/SMPD1/SWAP70/TGFB1	34
GO:0003231	cardiac ventricle development	33/1842	131/17913	8.27108e-07	2.51308e-05	1.72946e-05	BMP10/DSP/FZD2/GATA4/HEG1/HEY2/HEYL/MEF2C/MIR1-1/MYBPC3/MYH6/MYH7/MYL2/MYL3/MYOCD/NKX2-5/NOS3/PROX1/RYR2/SCN5A/SLIT2/SOX4/TBX5/TGFB1/TGFB2/TGFBR3/TMEM65/TNNC1/TNNI3/TNNT2/TPM1/XIRP2/ZMPSTE24	33
GO:0031589	cell-substrate adhesion	62/1842	322/17913	8.27648e-07	2.51308e-05	1.72946e-05	ACTN1/ACTN2/ADAMTS9/AJUBA/APOA1/AXL/BCL2/BCL6/CD44/COL16A1/COL8A1/CORO1A/CTNNB1/DAPK3/DDR1/DOCK1/ECM2/EMILIN1/EPHA3/FAM107A/FN1/GCNT2/GSK3B/ID1/ITGA10/ITGA5/ITGB1/ITGB2/ITGB4/ITGB5/JAK2/LAMB1/LDB1/LYVE1/MAP4K4/NID1/PARVA/PEAK1/PECAM1/PHLDB2/PLAU/POSTN/PPM1F/PXN/RAC2/RHOA/S100A10/SERPINE1/SFRP1/SMAD3/SMOC2/SNED1/SORBS1/SPOCK1/THBS1/THY1/TRPM7/VAMP3/VCL/VWC2/VWF/ZYX	62
GO:0050886	endocrine process	24/1842	80/17913	9.04744e-07	2.73316e-05	1.88092e-05	ACE/ACE2/AGT/AGTR1/AGTR2/C1QTNF1/CORIN/CTSG/CYBA/CYP11B2/EDN1/EDN2/F2R/F2RL1/KRAS/LEP/MME/NOS3/PTPN11/RAB11FIP3/RAB11FIP5/RETN/RHOA/SUCNR1	24
GO:1903169	regulation of calcium ion transmembrane transport	35/1842	144/17913	9.68543e-07	2.91104e-05	2.00333e-05	AHNAK/ATP1A2/ATP1B1/CACNA1C/CACNA2D1/CACNB2/CALM2/CASQ1/CAV3/CORO1A/CYBA/DIAPH1/F2R/FMR1/FYN/HRC/HSPA2/HTT/JPH2/LYN/MIR1-1/MIR133A1/MIR133A2/NPPA/PDE4D/PIK3CG/PKD2/PLN/RGN/RYR2/SLC8A1/SNCA/TGFB1/THY1/TMEM38B	35
GO:0034599	cellular response to oxidative stress	58/1842	296/17913	1.03086e-06	3.08268e-05	2.12145e-05	AIF1/AIFM1/AKT1/ATP13A2/ATP2A2/ATP7A/AXL/BAG5/BCL2/BNIP3/CAMKK2/CTNNB1/CYBA/CYBB/CYCS/CYP1B1/ENDOG/FBXW7/FOS/FOXO1/FXN/FYN/GATA4/GPX8/IL6/IMPACT/JAK2/JUN/KDM6B/KLF2/KLF4/LONP1/MGST1/MIR133A1/MIR133A2/MMP2/MMP3/NOS3/NOX4/NR4A3/PDGFRA/PENK/PKD2/PLA2R1/PRDX6/PRKCD/PRKRA/PXN/RELA/RGN/RWDD1/SIN3A/SIRPA/SNCA/TP53/TPM1/TXNRD1/ZC3H12A	58
GO:0050878	regulation of body fluid levels	86/1842	499/17913	1.04928e-06	3.12199e-05	2.14851e-05	ACTB/ADCY3/ADCY4/ADCY6/ANXA2/ANXA5/APOE/ATP7A/C1QTNF1/CCND1/CD59/CD9/CEL/CLIC1/COMP/COPA/CYBA/CYP11B2/DDR1/DGKH/DOCK1/DTNBP1/EDN1/EHD2/ENTPD1/F13A1/F2R/F2RL1/F2RL2/F8/FAP/FCER1G/FYN/GATA2/GATA4/GATA6/GJA1/GNA15/GNAQ/GPI/HEG1/HYAL2/IL6/INPP5K/ITPR1/ITPR3/JAK2/KALRN/LYN/MAFK/MFN2/MLLT6/MYH9/NME1/NOS3/NPPB/NPR3/PAFAH2/PDGFRA/PDSS2/PHF21A/PIK3CA/PIK3CG/PIK3R6/PLAU/PLEK/PRKCD/PRKCH/PRKCQ/PROS1/PTPN11/…	86
GO:0007204	positive regulation of cytosolic calcium ion concentration	52/1842	255/17913	1.06292e-06	3.14678e-05	2.16556e-05	AGT/AGTR1/ATP1A2/ATP2B4/BCL2/C1QTNF1/CACNA1C/CACNA2D1/CACNB2/CALM2/CASQ1/CAV3/CORO1A/CYBA/DDIT3/DIAPH1/EDN1/EDN2/EDNRA/ESR1/F2R/F2RL1/FYN/GATA2/GJA1/GNA15/GRM1/HRC/HTT/ITPR1/ITPR3/JAK2/JPH2/LYN/MIR1-1/MIR133A1/MIR133A2/PDE4D/PDGFRA/PIK3CG/PKD2/PLCE1/PLN/RYR2/S1PR3/SLC8A1/SNCA/SWAP70/SYNPO/TGFB1/THY1/TMEM38B	52
GO:0014812	muscle cell migration	28/1842	103/17913	1.07752e-06	3.17414e-05	2.18439e-05	ACE/AGT/AIF1/ATP7A/BCL2/DDR1/DOCK4/FOXO4/HDAC4/IGF1/IGFBP3/IGFBP5/MEF2C/MIR20A/MIR221/MIR451A/MYOCD/NOX4/NR4A3/PARVA/PDGFRB/PLAU/POSTN/SERPINE1/SLIT2/THBS4/TPM1/TRIB1	28
GO:0022898	regulation of transmembrane transporter activity	50/1842	242/17913	1.13749e-06	3.33205e-05	2.29306e-05	ACTB/ACTN2/AHNAK/APP/ATP1A2/ATP1B1/ATP1B3/ATP7A/BCL2/CACNA2D1/CACNB2/CALM2/CAPN1/CASQ1/CAV3/CCL2/CHCHD10/FGF12/FHL1/FMR1/GJA1/GPD1L/GRIA3/HRC/HSPA2/HTT/JPH2/KCNAB1/KCNIP2/KLHL24/MEF2C/MIR1-1/MIR133A1/MIR133A2/NPPA/OSR1/PDE4D/PKD2/PLN/PTPN3/RGN/RNF207/RYR2/SCN2B/SLMAP/SNCA/TESC/WNK2/WWP2/YWHAH	50
GO:0098900	regulation of action potential	19/1842	55/17913	1.14238e-06	3.33205e-05	2.29306e-05	ATP2A2/CACNA1C/CACNA2D1/CAV3/CTNNA3/CXADR/DSP/FGF12/FMR1/HCN4/KCNJ2/MIR1-1/MIR133A1/MIR133A2/PTPN3/RNF207/RYR2/SCN5A/SLMAP	19
GO:0070302	regulation of stress-activated protein kinase signaling cascade	47/1842	222/17913	1.15077e-06	3.34005e-05	2.29857e-05	AKT1/APP/CAV3/COPS5/CYLD/DTNBP1/DUSP1/DVL3/EDN1/F2RL1/FGD2/FOXO1/GADD45A/GADD45B/GADD45G/HDAC3/HIPK2/HRAS/IGF1R/KARS/KLHL31/LEP/LTBR/LYN/MAP2K1/MAP2K2/MAP3K3/MAP3K6/MAP4K4/MAPK8IP3/MDFIC/MIR20A/MYC/PTPN1/RAP2A/RAPGEF1/SASH1/SFRP1/SH3RF1/SH3RF2/SH3RF3/SIRPA/TGFB2/TPD52L1/ZC3H12A/ZMPSTE24/ZMYND11	47
GO:0051899	membrane depolarization	24/1842	81/17913	1.16142e-06	3.35453e-05	2.30853e-05	ATP1A2/BCL2/CACNA1C/CACNA2D1/CACNB2/CAV3/EDN1/FGF12/FHL1/GJA1/GOT1/GPD1L/HCN4/JUN/KCNJ2/MIR1-1/MLLT11/PTPN3/SCN10A/SCN2B/SCN5A/SLC8A1/SLMAP/YWHAH	24
GO:0010611	regulation of cardiac muscle hypertrophy	23/1842	76/17913	1.28202e-06	3.68488e-05	2.53588e-05	AGT/ATP2B4/BMP10/CAV3/EDN1/ERRFI1/FOXO1/HAMP/IGF1/LMCD1/LMNA/MIR1-1/MIR133A1/MIR133A2/MIR20A/MLIP/NR4A3/PDE5A/RGS2/RGS4/SMAD3/TNFRSF1A/TRIM63	23
GO:0033002	muscle cell proliferation	50/1842	243/17913	1.29171e-06	3.69478e-05	2.54269e-05	AGT/AIF1/AKT1/ARID2/BMP10/CALCRL/CDKN1A/CNN1/CTNNB1/CYBA/EDN1/GATA6/GJA1/HBEGF/HDAC4/HEY2/IGF1/IGFBP3/IGFBP5/IL6/JAK2/JUN/KLF4/MEF2C/MEIS1/MFN2/MIR1-1/MIR133A1/MIR133A2/MIR20A/MIR221/MIR590/MMP2/MYOCD/NAMPT/NKX2-5/NPR3/NR4A3/PDGFRB/PIM1/STAT3/TBX5/TGFB2/TGFB3/TGFBR3/THBS1/TPM1/TRIB1/XRCC6/YAP1	50
GO:0035690	cellular response to drug	67/1842	362/17913	1.3249e-06	3.74575e-05	2.57777e-05	ACTB/ADCY3/ADCY6/ADSSL1/AGRN/AGTR2/AIF1/AIFM1/ARHGEF2/ATP2B4/AXL/BCL11A/BNIP3/CTNNB1/CXCR4/CYBA/CYBB/CYP1B1/DDIT4/EDN1/EGR1/ENDOG/ERRFI1/FBXO32/FDX1/FMR1/FOXO1/FXN/FYN/GNA15/GNAQ/ID1/IL6/IMPACT/KDM6B/KLF2/KLF4/KMT2A/MEF2C/MIR133A1/MIR133A2/MMP3/MSX1/MT2A/MYC/NME1/NR4A3/OPA1/PPM1F/PPP1R9B/PRKCD/QDPR/RAP2A/RELA/RYR2/SERPINF1/SFRP1/SIN3A/SIRPA/SLC8A1/SLIT2/TFRC/TGFB1/TMEM38B/TP53/TRIM41/ZC3H12A	67
GO:0016054	organic acid catabolic process	51/1842	250/17913	1.3285e-06	3.74575e-05	2.57777e-05	ABCD3/ABHD10/ACAA1/ACAA2/ACACB/ACADVL/ACAT1/ACOT8/ACOX2/ACOX3/ADHFE1/AIG1/AKT1/ALDH5A1/ATP2B4/BCAT2/BCKDHB/CD44/CEL/CPT1B/CRYM/DECR1/DLD/ECI2/EHHADH/ETFB/ETFDH/FAH/GCDH/GOT1/GPT/HAAO/HADHB/HIBADH/HSD17B10/HSD17B4/HYAL2/IDUA/LEP/LYVE1/MCCC2/MLYCD/NOS3/PCCA/PLA2G15/PLIN5/QDPR/SCP2/SDSL/TGFB1/TST	51
GO:0046395	carboxylic acid catabolic process	51/1842	250/17913	1.3285e-06	3.74575e-05	2.57777e-05	ABCD3/ABHD10/ACAA1/ACAA2/ACACB/ACADVL/ACAT1/ACOT8/ACOX2/ACOX3/ADHFE1/AIG1/AKT1/ALDH5A1/ATP2B4/BCAT2/BCKDHB/CD44/CEL/CPT1B/CRYM/DECR1/DLD/ECI2/EHHADH/ETFB/ETFDH/FAH/GCDH/GOT1/GPT/HAAO/HADHB/HIBADH/HSD17B10/HSD17B4/HYAL2/IDUA/LEP/LYVE1/MCCC2/MLYCD/NOS3/PCCA/PLA2G15/PLIN5/QDPR/SCP2/SDSL/TGFB1/TST	51
GO:0007179	transforming growth factor beta receptor signaling pathway	41/1842	184/17913	1.38543e-06	3.88773e-05	2.67547e-05	ARHGEF18/CAV3/CBL/CDKN1C/CREBBP/EMILIN1/EP300/FBN1/FMOD/FOS/GCNT2/GDF10/GDF15/GLG1/GOT1/HIPK2/HTRA1/ID1/ITGB5/JUN/LEFTY2/LRRC32/LTBP2/LTBP4/MYOCD/PXN/RASL11B/RHOA/SKI/SKIL/SMAD3/SMURF1/SMURF2/TGFB1/TGFB2/TGFB3/TGFBR3/THBS1/TP53/ZEB1/ZYX	41
GO:0031098	stress-activated protein kinase signaling cascade	55/1842	278/17913	1.42473e-06	3.97917e-05	2.7384e-05	AGT/AKT1/APP/CAV3/COPS5/CRYAB/CYLD/DTNBP1/DUSP1/DVL3/EDN1/F2RL1/FBXW11/FGD2/FOXO1/GADD45A/GADD45B/GADD45G/HDAC3/HIPK2/HRAS/IGF1R/KARS/KLHL31/LEP/LTBR/LYN/MAP2K1/MAP2K2/MAP3K3/MAP3K6/MAP3K8/MAP4K4/MAPK8IP3/MDFIC/MIR20A/MYC/PTPN1/RAP2A/RAPGEF1/RHOA/SASH1/SFRP1/SH3RF1/SH3RF2/SH3RF3/SIRPA/TGFB2/TNFRSF19/TPD52L1/TRIB1/ZC3H12A/ZFP36/ZMPSTE24/ZMYND11	55
GO:0006470	protein dephosphorylation	60/1842	313/17913	1.44149e-06	4.00706e-05	2.7576e-05	AGTR2/B3GAT3/BCL2/BOD1/CALM2/CDCA2/CTDSP2/CTTNBP2NL/CYCS/DMPK/DUSP1/DUSP16/DUSP23/DUSP26/DUSP28/DUSP5/FBXW11/GSK3B/HTT/IGFBP3/JAK2/LGALS3/MASTL/MTMR3/MYH6/NUAK1/PDGFRB/PHACTR1/PPM1D/PPM1F/PPP1R14B/PPP1R1A/PPP1R1C/PPP1R26/PPP1R3C/PPP1R9B/PPP2CA/PPP2R2A/PPP2R3B/PPP2R5A/PPP2R5C/PRKCD/PTPN1/PTPN11/PTPN14/PTPN21/PTPN3/PTPN9/PTPRA/PTPRD/PTPRE/PTPRR/RGN/SH3RF2/SHOC2/SLC39A10/SMPD1/SWAP70/TGFB1/TIMM50	60
GO:0019395	fatty acid oxidation	26/1842	93/17913	1.44875e-06	4.00843e-05	2.75854e-05	ABCD3/ACAA1/ACAA2/ACACB/ACADVL/ACOT8/ACOX2/ACOX3/AKT1/CPT1B/CYP4V2/DECR1/ECI2/EHHADH/ETFB/ETFDH/GCDH/HADHB/HSD17B4/LEP/MLYCD/NR4A3/PDK4/PLIN5/PRKAG2/SCP2	26
GO:0010614	negative regulation of cardiac muscle hypertrophy	15/1842	37/17913	1.49317e-06	4.11212e-05	2.82989e-05	ATP2B4/BMP10/CAV3/ERRFI1/FOXO1/LMNA/MIR1-1/MIR133A1/MIR133A2/MLIP/RGS2/RGS4/SMAD3/TNFRSF1A/TRIM63	15
GO:0031668	cellular response to extracellular stimulus	51/1842	251/17913	1.50372e-06	4.122e-05	2.83669e-05	AIF1/AIFM1/ARHGAP35/ATF3/AXL/BCL11A/BCL2/CBL/CD68/CDKN1A/CYBA/CYBB/DNM1L/EIF2AK3/FAM107A/FES/FOS/FOXO1/FYN/GSDMD/HIGD1A/HSPA8/IFI16/IMPACT/JUN/KANK2/KLF10/LAMP2/LEP/LYN/MTMR3/MYOCD/NAMPT/OPA1/PDK4/PENK/PIM1/POSTN/PPM1D/PPP1R9B/RNF152/SFRP1/SLC2A1/SLC38A2/TNC/TP53/ULK1/WDR45B/WIPI1/XBP1/ZC3H12A	51
GO:0022604	regulation of cell morphogenesis	76/1842	430/17913	1.67429e-06	4.56842e-05	3.14391e-05	AGO4/ALDOA/APOA1/APOE/ARAP1/ARHGAP35/ARHGDIA/ARHGEF18/BCL11A/BRSK1/CCL11/CCL2/CD44/CDC42EP4/CHN1/CORO1A/CPNE5/CUL7/CUX1/CXCR4/CYFIP1/DAPK3/DBN1/DIAPH1/DNM1L/DNMBP/DOCK1/DVL3/FES/FGD2/FGD5/FGR/FMNL3/FN1/FYN/GSK3B/HCK/ID1/ITGB2/KALRN/KIF13B/MAP1B/MAP2/MAP2K1/MSN/MYH14/MYH9/OPA1/PALM/PARVA/PDLIM5/PLXNB2/POSTN/PTPRD/RAP2A/RHOA/RTN4/S100A10/S100A13/SH3D19/SH3KBP1/SIPA1L1/SKIL/SLIT2/SMURF1/SPARC/SPP1/S…	76
GO:0009062	fatty acid catabolic process	26/1842	94/17913	1.80875e-06	4.91265e-05	3.38081e-05	ABCD3/ACAA1/ACAA2/ACACB/ACADVL/ACOT8/ACOX2/ACOX3/AIG1/AKT1/CEL/CPT1B/DECR1/ECI2/EHHADH/ETFB/ETFDH/GCDH/HADHB/HSD17B4/LEP/MLYCD/PCCA/PLA2G15/PLIN5/SCP2	26
GO:1903034	regulation of response to wounding	39/1842	173/17913	1.83132e-06	4.95126e-05	3.40737e-05	APOE/ATP7A/C1QTNF1/CD9/CDKN1A/CXCR4/EDN1/F2R/F2RL1/FAP/GJA1/HBEGF/HRAS/INPP5F/KLF4/LYN/MAP2K1/MIR221/MIR451A/MIR590/MYH9/NOS3/PDGFRA/PHLDB2/PLAU/PLEK/PRKCD/PRKCQ/PROS1/RAB3A/RGMA/SERPINE1/SERPINE2/SMAD3/SMOC2/SOX15/SPP1/THBS1/XBP1	39
GO:0006101	citrate metabolic process	13/1842	29/17913	1.91779e-06	5.16148e-05	3.55205e-05	DLD/FAHD1/FH/IDH2/MDH2/ME3/NNT/PDHA1/PDHB/SDHA/SDHD/SUCLA2/SUCLG1	13
GO:0035303	regulation of dephosphorylation	44/1842	206/17913	1.94899e-06	5.2217e-05	3.59349e-05	AGTR2/B3GAT3/BOD1/CALM2/CD2BP2/CDCA2/DMPK/DUSP26/FARP1/GSK3B/HTT/IGFBP3/INPP5K/JAK2/LGALS3/MASTL/MEF2C/MTMR3/MYO1D/NUAK1/PDGFRB/PHACTR1/PLEK/PPP1R14B/PPP1R1A/PPP1R1C/PPP1R26/PPP1R3C/PPP1R9B/PPP2R2A/PPP2R3B/PPP2R5A/PPP2R5C/PRKCD/RGN/SH3RF2/SHOC2/SLC39A10/SMAD3/SMG6/SMPD1/SWAP70/TGFB1/TGFB2	44
GO:0055017	cardiac muscle tissue growth	28/1842	106/17913	2.0117e-06	5.36545e-05	3.69242e-05	AGT/AGTR2/ARID2/BMP10/CAV3/EDN1/GATA4/GATA6/GJA1/HAMP/HEG1/HEY2/IGF1/MEF2C/MEIS1/MIR1-1/MIR590/NKX2-5/NPPA/PDLIM5/PIM1/RGS2/RGS4/SORBS2/TBX5/TGFB2/TGFBR3/YAP1	28
GO:0006986	response to unfolded protein	37/1842	161/17913	2.05438e-06	5.4547e-05	3.75383e-05	ACADVL/ATF3/ATF6B/BAG3/CCL2/CCND1/COMP/COPS5/CREB3L2/CTDSP2/CUL7/DCTN1/DDIT3/EIF2AK3/EP300/EXTL1/GOSR2/HSPA8/HSPB3/HSPB7/IGFBP1/LMNA/MFN2/NCK2/PACRG/PTPN1/RHBDD1/SEC31A/SERPINH1/SHC1/SRPRB/THBS1/THBS4/TLN1/TSPYL2/WIPI1/XBP1	37
GO:0035023	regulation of Rho protein signal transduction	31/1842	124/17913	2.09642e-06	5.54149e-05	3.81356e-05	APOA1/APOE/ARHGAP35/ARHGDIA/ARHGDIB/ARHGEF12/ARHGEF17/ARHGEF18/ARHGEF2/ARHGEF28/ARHGEF9/BCL6/DNMBP/ECT2L/F2R/F2RL1/FARP1/FGD2/FGD5/HEG1/ITGB1/KALRN/KANK2/OBSCN/PDGFRB/PLEKHG2/PREX2/RAF1/SOS1/SYNPO2L/TRIO	31
GO:0030099	myeloid cell differentiation	73/1842	411/17913	2.2204e-06	5.84312e-05	4.02114e-05	ABI1/ACTN1/AGO4/ANXA2/APP/BCL6/BPGM/C1QC/CASP3/CDKN1C/CEBPB/CREBBP/CTNNB1/EP300/F2RL1/FASN/FBN1/FBXW7/FCER1G/FES/FOS/GAB2/GATA2/HCLS1/HIPK2/HMGB2/IFI16/JAK2/JUN/JUNB/KLF10/KLF2/KMT2A/KMT2C/LDB1/LGALS3/LRRK1/LTBR/LYN/MAFB/MB/MEF2C/MEIS1/MEIS2/MIR221/MITF/MT1G/MYC/MYH9/NFKBIA/NME1/NOTCH2/NR4A3/PIAS3/PRKCQ/PTPN11/PURB/SFRP1/SH3PXD2A/SIN3A/SNRK/STAT3/STAT5B/TESC/TFRC/TGFB1/TGFBR3/THBS1/TMEM178A/TRIB1…	73
GO:0034440	lipid oxidation	26/1842	95/17913	2.2492e-06	5.89269e-05	4.05526e-05	ABCD3/ACAA1/ACAA2/ACACB/ACADVL/ACOT8/ACOX2/ACOX3/AKT1/CPT1B/CYP4V2/DECR1/ECI2/EHHADH/ETFB/ETFDH/GCDH/HADHB/HSD17B4/LEP/MLYCD/NR4A3/PDK4/PLIN5/PRKAG2/SCP2	26
GO:0007160	cell-matrix adhesion	45/1842	214/17913	2.33891e-06	6.10075e-05	4.19843e-05	ACTN1/ACTN2/ADAMTS9/AJUBA/BCL2/BCL6/CD44/COL16A1/CTNNB1/DAPK3/DDR1/ECM2/EMILIN1/EPHA3/FAM107A/FN1/GSK3B/ITGA10/ITGB1/ITGB2/ITGB4/ITGB5/LDB1/LYVE1/MAP4K4/NID1/PEAK1/PECAM1/PHLDB2/PLAU/POSTN/PPM1F/PXN/RHOA/S100A10/SERPINE1/SFRP1/SMAD3/SNED1/SORBS1/THBS1/THY1/TRPM7/VCL/ZYX	45
GO:0008637	apoptotic mitochondrial changes	30/1842	119/17913	2.52836e-06	6.56597e-05	4.5186e-05	ACAA2/AKT1/ATG3/BCL2/BNIP3/CAMK2A/CCAR2/CHCHD10/DNM1L/FXN/GSK3B/HIGD1A/IFIT2/IGF1/JUN/LMNA/MFF/MIR29A/MLLT11/OPA1/PDCD5/RHOT1/SLC25A4/THEM4/TIMM50/TP53/TP53BP2/YWHAG/YWHAH/YWHAQ	30
GO:0034330	cell junction organization	54/1842	277/17913	2.82032e-06	7.29218e-05	5.01836e-05	ACE/ACE2/ACTB/ACTN1/ACTN2/AGT/AJUBA/BCL2/CD9/CDH11/COL16A1/CTNNB1/CXADR/DAPK3/DLG5/DSP/EPHA3/F2R/F2RL1/FAM107A/FLNC/FN1/FSCN1/GJA1/GNPAT/HEG1/HIPK1/ITGA5/ITGB4/LDB1/MAP4K4/MAPRE2/NLGN4X/PEAK1/PHLDB2/PLEKHA7/PPM1F/PRKCH/PVR/RAPGEF1/RHOA/S100A10/SFRP1/SMAD3/SORBS1/TGFB1/TGFB2/TGFB3/THBS1/THY1/TJP1/TLN1/VCL/XIRP2	54
GO:0060348	bone development	41/1842	189/17913	2.85506e-06	7.34992e-05	5.0581e-05	ABI1/ALPL/ANXA2/CHSY1/COL27A1/COMP/DCHS1/EP300/FAT4/FBN1/FBXW7/FGF18/GJA1/GLG1/GLI3/IGF1/LEP/LRP5/LRRK1/MEF2C/MEIS1/MSX1/NOTCH2/PTPN11/RANBP3L/RGN/RHOA/RUNX2/SERPINH1/SFRP4/SKI/SPARC/SULF1/SULF2/TGFB1/TGFB3/TMEM38B/TP53/TTC9/TYROBP/ZMPSTE24	41
GO:0061448	connective tissue development	49/1842	243/17913	3.00231e-06	7.69553e-05	5.29594e-05	ACAT1/ARID5B/ATP7A/BMP10/BMP8A/CD44/CHRDL2/CHSY1/COL27A1/COMP/CREB3L2/CTNNB1/CTSK/DYRK1B/EDN1/EGR1/EIF2AK3/FBXW4/FGF18/FRZB/GLG1/GLI3/GPR4/HYAL2/LEP/LOXL2/LRP5/LUM/MEF2C/MGP/MSX1/MUSTN1/OSR1/OXCT1/PDGFRB/PIK3CA/PRRX1/RELA/RUNX2/SERPINH1/SMAD3/SPTLC2/SULF1/SULF2/TGFB1/TIMP1/XBP1/ZEB1/ZMPSTE24	49
GO:0060325	face morphogenesis	13/1842	30/17913	3.06601e-06	7.82492e-05	5.38499e-05	ARID5B/CRISPLD2/EP300/MMP2/MSX1/PDGFRA/PTPN11/RRAS/SGPL1/SKI/TGFB1/TGFB3/TIPARP	13
GO:2001236	regulation of extrinsic apoptotic signaling pathway	35/1842	151/17913	3.12375e-06	7.93807e-05	5.46285e-05	AGT/AGTR2/AKT1/AR/ARHGEF2/ATF3/BCL2/CYLD/DAPK3/FEM1B/FYN/G0S2/HMGB2/HTT/HYAL2/IGF1/LGALS3/LMNA/LTBR/MAP2K5/MIR221/NOS3/RAF1/RELA/SERPINE1/SFRP1/SH3RF1/SKIL/STRADB/THBS1/TMBIM1/UNC5B/YAP1/ZC3HC1/ZMYND11	35
GO:0032388	positive regulation of intracellular transport	43/1842	203/17913	3.18717e-06	8.04109e-05	5.53375e-05	ACTN2/ANXA2/ATG13/B3GAT3/BAG3/CACNB2/DNM1L/EHD2/FBXW7/FCER1G/FGR/FYN/GAB2/GATA2/GLI3/GSK3B/HCLS1/HDAC3/HRAS/HYAL2/IPO5/ITGB2/LEP/MAP2/MFF/MSN/NPPA/NUMA1/PDCD5/PRKCD/RAC2/SAE1/SCP2/SMAD3/TBC1D20/TGFB1/TMEM30B/TP53/UBR5/UNC13B/VAMP8/XPO4/ZC3H12A	43
GO:0006816	calcium ion transport	73/1842	415/17913	3.19145e-06	8.04109e-05	5.53375e-05	AGT/AHNAK/ANXA2/ANXA5/ATP1A2/ATP1B1/ATP2A2/ATP2B4/BCL2/CACNA1C/CACNA2D1/CACNA2D3/CACNB2/CALCRL/CALM2/CAMK2A/CASQ1/CAV3/CCL2/CORO1A/CTNNB1/CXCR4/CYBA/DDIT3/DIAPH1/DNM1L/EGF/F2R/FMR1/FYN/GJA1/HRC/HSPA2/HTT/INPP5K/ITPR1/ITPR3/JPH2/LGALS3/LILRA5/LYN/MICU2/MIR1-1/MIR133A1/MIR133A2/NOS3/NPPA/OPA1/ORAI3/PDE4D/PDGFRB/PIK3CG/PKD1L2/PKD2/PLN/PMPCB/RAMP1/RGN/RGS4/RHOA/RYR2/SEC61A1/SLC30A1/SLC8A1/SNCA/SPG7/T…	73
GO:0036293	response to decreased oxygen levels	66/1842	365/17913	3.62036e-06	9.08313e-05	6.25086e-05	ACAA2/AGTRAP/AIFM1/AJUBA/AKT1/ANKRD1/APOLD1/ATP1B1/ATP7A/BCL2/BNIP3/CASP3/CBL/CREBBP/CRYAB/CXCR4/CYBA/CYBB/DDIT4/DNM1L/EDN1/EDNRA/EGR1/ENDOG/ENO1/EP300/GATA6/HIGD1A/HIPK2/HMOX2/HP1BP3/ITPR1/KCNA5/LEP/LMNA/LONP1/LOXL2/MB/MECP2/MTHFR/MYC/MYOCD/NAMPT/NDRG1/NOX4/NPPA/OPA1/PENK/PLAU/POSTN/PSMA3/PSMC2/RAF1/RHOA/RYR2/SFRP1/SLC2A1/SLC8A1/SMAD3/TGFB1/TGFB2/TGFB3/TGFBR3/THBS1/TP53/WTIP	66
GO:0030168	platelet activation	35/1842	152/17913	3.66266e-06	9.15046e-05	6.2972e-05	ACTB/APOE/C1QTNF1/CD9/CLIC1/COMP/DGKH/F2R/F2RL2/F8/FCER1G/FYN/GNA15/GNAQ/IL6/ITPR1/ITPR3/LYN/MYH9/NOS3/PDGFRA/PIK3CA/PIK3CG/PIK3R6/PLEK/PRKCD/PRKCH/PRKCQ/PTPN11/RAF1/SERPINE2/TLN1/TSPAN32/VCL/VWF	35
GO:0070838	divalent metal ion transport	78/1842	454/17913	3.72666e-06	9.24647e-05	6.36327e-05	AGT/AHNAK/ANXA2/ANXA5/ATP1A2/ATP1B1/ATP2A2/ATP2B4/BCL2/CACNA1C/CACNA2D1/CACNA2D3/CACNB2/CALCRL/CALM2/CAMK2A/CASQ1/CAV3/CCL2/CORO1A/CTNNB1/CXCR4/CYBA/DDIT3/DIAPH1/DNM1L/EGF/F2R/FMR1/FYN/GJA1/HRC/HSPA2/HTT/INPP5K/ITPR1/ITPR3/JPH2/KCNJ2/LGALS3/LILRA5/LYN/MICU2/MIR1-1/MIR133A1/MIR133A2/MRS2/NOS3/NPPA/OPA1/ORAI3/PDE4D/PDGFRB/PIK3CG/PKD1L2/PKD2/PLN/PMPCB/RAMP1/RGN/RGS4/RHOA/RYR2/SEC61A1/SLC30A1/SLC30A3…	78
GO:0071902	positive regulation of protein serine/threonine kinase activity	60/1842	322/17913	3.73232e-06	9.24647e-05	6.36327e-05	AJUBA/AKT1/ATP2B4/CALM2/CCND1/CCND2/CXCR4/DAZAP2/DUSP5/DVL3/EDN1/EGF/F2R/FGD2/FGF18/FPR1/GADD45A/GADD45B/GADD45G/GDF15/GRM1/HIGD1A/HRAS/IGF1/JAK2/KARS/KIDINS220/KRAS/MAP2K1/MAP2K2/MAP2K5/MAP3K3/MAP3K6/MAP3K8/MAPK8IP3/MAPKAPK3/MDFIC/NOX4/PDE5A/PDGFRB/PIK3CG/PIK3R6/PKD2/PLCE1/PPP2CA/PROX1/PTPN1/PTPN11/RAF1/RAPGEF1/RHOA/S100A12/SASH1/SHC1/SNCA/TGFB1/TGFB3/THBS1/TPD52L1/TRAF7	60
GO:0007266	Rho protein signal transduction	36/1842	159/17913	4.04624e-06	9.9824e-05	6.86973e-05	AGTR1/APOA1/APOE/ARHGAP1/ARHGAP35/ARHGDIA/ARHGDIB/ARHGEF12/ARHGEF17/ARHGEF18/ARHGEF2/ARHGEF28/ARHGEF9/BCL6/DNMBP/ECT2L/F2R/F2RL1/FARP1/FGD2/FGD5/HEG1/ITGB1/KALRN/KANK2/OBSCN/PDGFRB/PECAM1/PLEKHG2/PREX2/RAF1/RHOA/SOS1/SYNPO2L/TRIO/WAS	36
GO:0007178	transmembrane receptor protein serine/threonine kinase signaling pathway	60/1842	323/17913	4.13359e-06	0.000101556	6.98892e-05	ARHGEF18/BMP10/CAV3/CBL/CDKN1C/COMP/CREBBP/EGR1/EMILIN1/EP300/FBN1/FMOD/FOS/GATA4/GCNT2/GDF10/GDF15/GLG1/GOT1/HIPK2/HTRA1/ID1/ITGB5/JUN/LEFTY2/LRRC32/LTBP2/LTBP4/MIR20A/MSX1/MYH6/MYOCD/NKX2-5/NUMA1/PXN/RASL11B/RBPMS/RHOA/RUNX2/RYR2/SFRP1/SFRP4/SKI/SKIL/SMAD3/SMURF1/SMURF2/SPTBN1/SULF1/TGFB1/TGFB2/TGFB3/TGFBR3/THBS1/TP53/VWC2/WWTR1/ZEB1/ZNF423/ZYX	60
GO:0051495	positive regulation of cytoskeleton organization	43/1842	205/17913	4.15943e-06	0.000101769	7.00355e-05	ACTN2/APOA1/ARPC1B/ARPC3/BMP10/CAV3/CCL11/CORO1A/CYFIP1/DCTN1/EDN1/F2RL1/FCHSD2/FES/GSN/HCK/HCLS1/HRAS/ID1/IQGAP2/LMOD2/MAP1B/MECP2/MIR1-1/MYLK3/NAV3/NCK2/NOX4/NUMA1/PLEK/PPM1F/PROX1/PXN/RHOA/S100A10/SFRP1/SMAD3/SWAP70/SYNPO2L/TGFB3/TPM1/TRIM27/WAS	43
GO:0010522	regulation of calcium ion transport into cytosol	26/1842	98/17913	4.2266e-06	0.000102986	7.08735e-05	ATP1A2/BCL2/CACNA1C/CALM2/CASQ1/CORO1A/CYBA/DIAPH1/F2R/FYN/HRC/HTT/JPH2/LYN/MIR1-1/MIR133A1/MIR133A2/PDE4D/PKD2/PLN/RYR2/SLC8A1/SNCA/TGFB1/THY1/TMEM38B	26
GO:0030258	lipid modification	41/1842	192/17913	4.32944e-06	0.00010506	7.23005e-05	ABCD3/ACAA1/ACAA2/ACACB/ACADVL/ACAT1/ACOT8/ACOX2/ACOX3/AGK/AGT/AGTR1/AKT1/APOA1/APOE/CPT1B/CYP4V2/DECR1/ECI2/EHHADH/ETFB/ETFDH/GCDH/HADHB/HSD17B4/INPP1/INPP5F/INPP5K/IP6K1/LEP/MLYCD/MTMR3/NR4A3/PDK4/PI4K2A/PIK3CA/PIK3R6/PLIN5/PRKAG2/SCP2/ST3GAL2	41
GO:0070482	response to oxygen levels	69/1842	389/17913	4.38336e-06	0.000105275	7.24483e-05	ACAA2/AGTRAP/AIFM1/AJUBA/AKT1/ANKRD1/APOLD1/ATP1B1/ATP7A/BCL2/BNIP3/CASP3/CBL/CDKN1A/CREBBP/CRYAB/CXCR4/CYBA/CYBB/DDIT4/DNM1L/EDN1/EDNRA/EGR1/ENDOG/ENO1/EP300/FOXO1/GATA6/HIGD1A/HIPK2/HMOX2/HP1BP3/ITPR1/KCNA5/LEP/LMNA/LONP1/LOXL2/MB/MECP2/MTHFR/MYC/MYOCD/NAMPT/NDRG1/NOX4/NPPA/OPA1/PDGFRB/PENK/PLAU/POSTN/PSMA3/PSMC2/RAF1/RHOA/RYR2/SFRP1/SLC2A1/SLC8A1/SMAD3/TGFB1/TGFB2/TGFB3/TGFBR3/THBS1/TP53/WTIP	69
GO:0006914	autophagy	80/1842	471/17913	4.39163e-06	0.000105275	7.24483e-05	AKT1/ATG13/ATG3/ATP13A2/ATP6V0E2/BAG3/BCL2/BNIP3/CALCOCO2/CAMKK2/CAPN1/CASP3/CLN3/CTSK/DAPK3/DDIT3/DNM1L/EP300/FBXW7/FOXO1/FYCO1/GATA4/GOLGA2/GSK3B/HGS/HSPA8/HTT/IFI16/ITGB4/ITPR1/KDM4A/KLHL3/LAMP2/LEP/LEPR/LRSAM1/MFN1/MFN2/MTMR3/NAMPT/NPC1/NRBF2/NUPR1/PIK3CA/PLEKHF1/PLEKHM1/PLK2/PRKAG2/RNF152/S100A8/S100A9/SCOC/SMCR8/SMURF1/SNCA/SPTLC2/STAM/STAT3/SUPT5H/TBC1D17/TMEM41B/TMEM74/TOMM40/TP53/TRIM8/U…	80
GO:0061919	process utilizing autophagic mechanism	80/1842	471/17913	4.39163e-06	0.000105275	7.24483e-05	AKT1/ATG13/ATG3/ATP13A2/ATP6V0E2/BAG3/BCL2/BNIP3/CALCOCO2/CAMKK2/CAPN1/CASP3/CLN3/CTSK/DAPK3/DDIT3/DNM1L/EP300/FBXW7/FOXO1/FYCO1/GATA4/GOLGA2/GSK3B/HGS/HSPA8/HTT/IFI16/ITGB4/ITPR1/KDM4A/KLHL3/LAMP2/LEP/LEPR/LRSAM1/MFN1/MFN2/MTMR3/NAMPT/NPC1/NRBF2/NUPR1/PIK3CA/PLEKHF1/PLEKHM1/PLK2/PRKAG2/RNF152/S100A8/S100A9/SCOC/SMCR8/SMURF1/SNCA/SPTLC2/STAM/STAT3/SUPT5H/TBC1D17/TMEM41B/TMEM74/TOMM40/TP53/TRIM8/U…	80
GO:0048545	response to steroid hormone	67/1842	375/17913	4.66957e-06	0.000111486	7.67229e-05	ACTA1/AGL/AGTR2/AIF1/AIFM1/ALPL/AR/ATP1A1/ATP1A2/ATP1A3/BCL2/BUD31/CASP3/CCND1/CDKN1A/CTNNB1/CYBA/CYBB/DDIT4/DUSP1/EDN1/EP300/ERRFI1/ESR1/FAM107A/FBXO32/FHL2/FIBIN/FKBP4/FOS/FOSB/FOXO1/GABRB1/GLB1/GOT1/HEYL/HMGB2/IGFBP7/IL6/JAK2/KANK2/KRAS/LBH/MAOB/NPC1/NR4A3/PIAS2/RELA/RHOA/RNF4/RWDD1/SERPINF1/SFRP1/SLIT2/SMARCA4/SPARC/SPP1/TADA3/TGFB1/TGFB2/TGFB3/THBS1/TRIM63/UBR5/YAP1/YWHAH/ZFP36	67
GO:0010880	regulation of release of sequestered calcium ion into cytosol by sarcoplasmic reticulum	13/1842	31/17913	4.78397e-06	0.000113759	7.82868e-05	ATP1A2/CACNA1C/CALM2/CASQ1/HRC/MIR1-1/MIR133A1/MIR133A2/PDE4D/PLN/RYR2/SLC8A1/TMEM38B	13
GO:0032872	regulation of stress-activated MAPK cascade	45/1842	220/17913	5.06564e-06	0.000119975	8.25646e-05	AKT1/APP/CAV3/COPS5/CYLD/DTNBP1/DUSP1/DVL3/EDN1/F2RL1/FGD2/FOXO1/GADD45A/GADD45B/GADD45G/HDAC3/HIPK2/HRAS/IGF1R/KARS/KLHL31/LEP/LTBR/MAP2K1/MAP2K2/MAP3K3/MAP3K6/MAP4K4/MAPK8IP3/MDFIC/MIR20A/MYC/PTPN1/RAP2A/RAPGEF1/SASH1/SFRP1/SH3RF1/SH3RF2/SH3RF3/SIRPA/TGFB2/TPD52L1/ZC3H12A/ZMYND11	45
GO:1903829	positive regulation of cellular protein localization	59/1842	318/17913	5.15336e-06	0.000121566	8.36597e-05	ACSL3/AKT1/ATG13/B3GAT3/BAG3/BCL2/BICD1/CLIP3/CNPY4/CYLD/EGF/EIF2AK3/EPHA3/FBXW7/FCER1G/FYN/GLI3/GPD1L/GSK3B/HCLS1/HDAC3/HRAS/HYAL2/IPO5/ITGB1/ITGB2/LEP/LGALS3/MAP1A/MFF/MSN/NDC80/NKD2/NUMA1/PDCD5/PRKCD/PRKCH/PTPN9/RAC2/RTN4/SAE1/SMAD3/SORBS1/SPTBN1/SYT11/TCP1/TGFB1/TMEM30B/TP53/TP53BP2/TRAPPC12/TRIM8/TYROBP/UBR5/XPO4/YWHAG/YWHAH/YWHAQ/ZC3H12A	59
GO:0072511	divalent inorganic cation transport	78/1842	458/17913	5.21072e-06	0.000122431	8.42553e-05	AGT/AHNAK/ANXA2/ANXA5/ATP1A2/ATP1B1/ATP2A2/ATP2B4/BCL2/CACNA1C/CACNA2D1/CACNA2D3/CACNB2/CALCRL/CALM2/CAMK2A/CASQ1/CAV3/CCL2/CORO1A/CTNNB1/CXCR4/CYBA/DDIT3/DIAPH1/DNM1L/EGF/F2R/FMR1/FYN/GJA1/HRC/HSPA2/HTT/INPP5K/ITPR1/ITPR3/JPH2/KCNJ2/LGALS3/LILRA5/LYN/MICU2/MIR1-1/MIR133A1/MIR133A2/MRS2/NOS3/NPPA/OPA1/ORAI3/PDE4D/PDGFRB/PIK3CG/PKD1L2/PKD2/PLN/PMPCB/RAMP1/RGN/RGS4/RHOA/RYR2/SEC61A1/SLC30A1/SLC30A3…	78
GO:0031102	neuron projection regeneration	18/1842	55/17913	5.26323e-06	0.000122691	8.44341e-05	APOA1/BCL2/INPP5F/JAK2/JUN/KLF4/MAP1B/MAP2K1/MAP4K4/MAPK8IP3/MATN2/MIR221/PRRX1/RGMA/SPP1/THY1/TNC/ULK1	18
GO:0048008	platelet-derived growth factor receptor signaling pathway	18/1842	55/17913	5.26323e-06	0.000122691	8.44341e-05	ARID5B/CBL/HGS/HIP1/JAK2/MIR221/MYO1E/MYOCD/NR4A3/PDGFRA/PDGFRB/PDGFRL/PTPN1/PTPN11/RAPGEF1/SGPL1/SNCA/TIPARP	18
GO:0003081	regulation of systemic arterial blood pressure by renin-angiotensin	12/1842	27/17913	5.35526e-06	0.000124347	8.55736e-05	ACE/ACE2/AGT/AGTR1/AGTR2/CTSG/CYBA/F2R/F2RL1/MME/RHOA/SUCNR1	12
GO:0086012	membrane depolarization during cardiac muscle cell action potential	11/1842	23/17913	5.51714e-06	0.000127606	8.78161e-05	ATP1A2/CACNA1C/CACNA2D1/CACNB2/CAV3/HCN4/KCNJ2/SCN2B/SCN5A/SLC8A1/SLMAP	11
GO:0071901	negative regulation of protein serine/threonine kinase activity	32/1842	136/17913	5.81885e-06	0.00013406	9.2258e-05	AKT1/APOE/CASP3/CAV3/CDKN1A/CDKN1C/DTNBP1/DUSP1/DUSP16/HEG1/HYAL2/INPP5K/IPO5/IRAK3/LRP5/LYN/MIR133A1/MIR133A2/MIR20A/MYOCD/PPP2CA/PRKAG2/PRKCD/PTPN1/RGS2/RGS3/RGS4/SFRP1/SMPD1/SPRED2/UCHL1/YWHAG	32
GO:0048732	gland development	73/1842	422/17913	5.90494e-06	0.000135516	9.32599e-05	ACAT1/AKT1/ALDH1A3/APOA1/AR/ARHGAP35/ARID5B/ATP7A/BCL2/BTBD7/CAPN1/CAV3/CCL11/CCND1/CDKN1C/CEBPB/CTNNB1/DDR1/DEAF1/EGF/ESR1/FASN/FBXW7/FEM1B/FGF7/FKBP4/FRZB/GATA2/GATA6/GJA1/GLI3/HAMP/IGFBP5/IRF6/JAK2/JUN/KALRN/KDM5B/KRAS/LBH/MAFB/MAN2A1/MAP2K1/MSN/MSX1/NKX2-5/NME1/PDGFRA/PIK3CA/PKD2/PROX1/PTPN3/QDPR/RAF1/RELA/RGN/RTN4/SERPINA5/SERPINE2/SERPINF1/SFRP1/SMAD3/SOCS2/STAT5B/SULF1/SULF2/TGFB1/TGFB2/TG…	73
GO:1905207	regulation of cardiocyte differentiation	20/1842	66/17913	6.08685e-06	0.000139151	9.57618e-05	CAV3/EDN1/GATA4/GATA6/HAMP/HEY2/IGF1/MEF2C/MIR1-1/MIR133A1/MIR133A2/MIR590/MYOCD/NKX2-5/PRICKLE1/RGS2/RGS4/TBX5/TGFB1/TGFB2	20
GO:0044262	cellular carbohydrate metabolic process	50/1842	256/17913	6.1487e-06	0.000140025	9.63629e-05	ABHD10/ACACB/AGL/AKT1/BRAF/C1QTNF1/COQ2/COQ3/CSGALNACT2/DDIT4/EP300/EXT1/EXT2/FOXO1/GAA/GALK1/GLB1/GNPTG/GOT1/GPD2/GSK3B/HDAC4/IDH2/IDUA/IGF1/IGFBP3/IGFBP4/IGFBP5/INPP5K/LEP/LEPR/MECP2/MIDN/MLYCD/NUPR1/PCDH12/PDK4/PHKA2/PLEK/PPP1R1A/PPP1R3C/PRKAG2/PYGB/RGN/SLC2A1/SNCA/SORBS1/STAT3/TP53/ZMPSTE24	50
GO:0019722	calcium-mediated signaling	40/1842	188/17913	6.18711e-06	0.00014036	9.65933e-05	AGTR1/ATP1A2/ATP1B1/ATP2B4/C10orf71/CACNA1C/CALM2/CAMKK2/CASQ1/CMKLR1/CXCR4/EDN1/EDN2/EIF2AK3/FHL2/GSK3B/HDAC4/HRC/HTT/IGF1/ITPR1/JPH2/LMCD1/MIR1-1/MIR133A1/MIR133A2/MYOZ2/NUDT4/PDE4D/PKD2/PLCE1/PLEK/PLN/RGN/RYR2/SGCD/SLC8A1/TMEM38B/TNNI3/ZMPSTE24	40
GO:0035966	response to topologically incorrect protein	38/1842	175/17913	6.34297e-06	0.000143346	9.86487e-05	ACADVL/ATF3/ATF6B/BAG3/CCL2/CCND1/COMP/COPS5/CREB3L2/CTDSP2/CUL7/DCTN1/DDIT3/EIF2AK3/EP300/EXTL1/GOSR2/HSPA8/HSPB3/HSPB7/IGFBP1/LMNA/MFN2/NCK2/PACRG/PTPN1/RHBDD1/SDF2L1/SEC31A/SERPINH1/SHC1/SRPRB/THBS1/THBS4/TLN1/TSPYL2/WIPI1/XBP1	38
GO:0061041	regulation of wound healing	33/1842	143/17913	6.53279e-06	0.000147075	0.000101215	APOE/C1QTNF1/CD9/CDKN1A/CXCR4/EDN1/F2R/F2RL1/FAP/GJA1/HBEGF/HRAS/LYN/MIR221/MIR451A/MIR590/MYH9/NOS3/PDGFRA/PHLDB2/PLAU/PLEK/PRKCD/PRKCQ/PROS1/RAB3A/SERPINE1/SERPINE2/SMAD3/SMOC2/SOX15/THBS1/XBP1	33
GO:0009636	response to toxic substance	83/1842	499/17913	6.68782e-06	0.000149429	0.000102834	ABCG2/ABTB2/ACTB/ACTC1/AIFM1/ALOX5AP/APOE/ATP1A2/ATP7A/AXL/BCL2/BNIP3/CA3/CASP3/CBL/CCND1/CD14/CDKN1A/CRYAB/CYBB/CYP1B1/DUSP1/EDN1/EGR1/EHMT1/ENDOG/FOS/FOXO1/FXN/FYN/GABRB1/GPX8/GSN/HAMP/IL6/IMPACT/JUN/KCNA5/KDM3B/KDM5B/KDM6B/KLF2/KLF4/LEP/LYN/MAOB/MAP1B/MB/MBP/MGST1/MIR133A1/MIR133A2/MSX1/NNT/NOS3/NR4A3/NUPR1/OXCT1/PDGFRB/PENK/PRDX6/PRKCD/PXDN/PXDNL/RELA/RGN/RGS2/RGS4/RHOA/S100A8/S100A9/SCN2B/SE…	83
GO:0043410	positive regulation of MAPK cascade	83/1842	499/17913	6.68782e-06	0.000149429	0.000102834	AJUBA/APOE/APP/AR/BRAF/C1QTNF1/CD44/CTNNB1/CXCR4/DOK5/DUSP5/DVL3/EDN1/EGF/F2R/F2RL1/FBXW7/FGD2/FGF18/FPR1/GADD45A/GADD45B/GADD45G/GATA4/GCNT2/GDF15/GPNMB/GRM1/HAVCR2/HIPK2/HRAS/IGF1/IGFBP3/IGFBP4/IL6/JAK2/JUN/KARS/KIDINS220/KRAS/LEP/LILRA5/LTBR/MAP2K1/MAP2K2/MAP2K5/MAP3K3/MAP3K6/MAP3K8/MAPK8IP3/MAPKAPK3/MARCO/MDFIC/MIR221/NOTCH2/NOX4/PDE5A/PDGFRA/PDGFRB/PIK3CG/PIK3R6/PLA2G2A/PLCE1/PTPN1/PTPN11/RA…	83
GO:0070296	sarcoplasmic reticulum calcium ion transport	15/1842	41/17913	6.79234e-06	0.000151193	0.000104049	ATP1A2/ATP2A2/CACNA1C/CALM2/CASQ1/HRC/MIR1-1/MIR133A1/MIR133A2/PDE4D/PLN/RYR2/SLC8A1/TMEM38B/ZMPSTE24	15
GO:0051403	stress-activated MAPK cascade	52/1842	271/17913	6.87456e-06	0.000152451	0.000104914	AGT/AKT1/APP/CAV3/COPS5/CRYAB/CYLD/DTNBP1/DUSP1/DVL3/EDN1/F2RL1/FBXW11/FGD2/FOXO1/GADD45A/GADD45B/GADD45G/HDAC3/HIPK2/HRAS/IGF1R/KARS/KLHL31/LEP/LTBR/MAP2K1/MAP2K2/MAP3K3/MAP3K6/MAP3K8/MAP4K4/MAPK8IP3/MDFIC/MIR20A/MYC/PTPN1/RAP2A/RAPGEF1/SASH1/SFRP1/SH3RF1/SH3RF2/SH3RF3/SIRPA/TGFB2/TNFRSF19/TPD52L1/TRIB1/ZC3H12A/ZFP36/ZMYND11	52
GO:0044242	cellular lipid catabolic process	40/1842	189/17913	7.08162e-06	0.000156456	0.000107671	ABCD3/ACAA1/ACAA2/ACACB/ACADVL/ACOT8/ACOX2/ACOX3/AIG1/AKT1/ASAH1/BCO2/CEL/CPT1B/CYP1B1/DECR1/ECI2/EHHADH/ETFB/ETFDH/GCDH/GLA/HADHB/HSD17B4/INPP5F/LDLR/LEP/LIPG/MLYCD/NEU3/PCCA/PIK3CG/PLA2G15/PLA2G4C/PLIN5/PRDX6/PRKCD/SCP2/SGPL1/SMPD1	40
GO:0060324	face development	16/1842	46/17913	7.18786e-06	0.000157857	0.000108635	ALDH1A3/ARID5B/CRISPLD2/EP300/MAP2K1/MMP2/MSX1/PDGFRA/PTPN11/RAF1/RRAS/SGPL1/SKI/TGFB1/TGFB3/TIPARP	16
GO:0051271	negative regulation of cellular component movement	65/1842	365/17913	7.19836e-06	0.000157857	0.000108635	ACTN1/ADAMTS9/AGTR2/AIF1/AKT1/APOE/ARHGDIB/ARID2/BCL2/BMP10/BST2/CCL2/CD9/CYP1B1/DLG5/DPYSL3/DUSP1/EMILIN1/FRMD5/GPR173/HYAL2/IDH2/IFITM1/IGFBP3/IGFBP5/KLF4/MAP2K5/MECP2/MEF2C/MIR133A1/MIR133A2/MIR20A/MIR221/MIR29A/MIR451A/MITF/MMP28/MMRN2/MYOCD/NAV3/PHLDB2/PTPRR/RAP2A/RECK/RGN/RHOA/RRAS/SERPINE1/SERPINF1/SFRP1/SLIT2/STARD13/STAT3/SULF1/TBX5/TGFB1/TGFBR3/THBS1/THY1/TIMP1/TPM1/TRIB1/VASH1/VCL/WAS	65
GO:0046579	positive regulation of Ras protein signal transduction	17/1842	51/17913	7.23557e-06	0.000158088	0.000108794	APOA1/AUTS2/F2R/F2RL1/HRAS/IGF1/JAK2/KRAS/LYN/MAP4K4/MAPRE2/NOTCH2/PDGFRB/RAPGEF1/SHC1/SHOC2/SYNPO2L	17
GO:0055075	potassium ion homeostasis	9/1842	16/17913	7.36112e-06	0.00016024	0.000110274	ATP1A1/ATP1A2/ATP1A3/ATP1B1/ATP1B3/CYP11B2/KCNA5/KCNJ2/KCTD7	9
GO:0072659	protein localization to plasma membrane	47/1842	237/17913	7.57189e-06	0.000164224	0.000113016	ACSL3/ACTB/ACTN2/AKT1/AR/ATP1B1/ATP1B3/BSG/CACNB2/CAV3/CLIP3/CNPY4/CSRP3/DCHS1/EHD2/EPHA3/FCER1G/GRASP/INPP5K/ITGB1/KIF13A/LGALS3/NKD2/PACS1/PALM/PICALM/PID1/PLEKHF1/PPP2R5A/PRKCH/PTPN9/RAMP1/RAP2A/RHOQ/S100A10/SEC16A/SLMAP/SMURF1/SORBS1/SPTBN1/TESC/TGFB1/TMBIM1/TNFRSF1A/TSPAN5/VAMP3/VAMP8	47
GO:0043666	regulation of phosphoprotein phosphatase activity	28/1842	113/17913	7.70911e-06	0.00016659	0.000114645	AGTR2/B3GAT3/BOD1/CALM2/DMPK/GSK3B/HTT/IGFBP3/JAK2/LGALS3/MASTL/NUAK1/PDGFRB/PHACTR1/PPP1R14B/PPP1R1A/PPP1R1C/PPP1R26/PPP1R3C/PPP1R9B/PPP2R2A/PPP2R3B/PPP2R5A/PPP2R5C/RGN/SH3RF2/SHOC2/SLC39A10	28
GO:0001503	ossification	68/1842	388/17913	7.79561e-06	0.000167847	0.000115509	AKT1/ALPL/ANKH/BCL2/BMP8A/CDH11/CEBPB/CEBPD/CHRDL2/CHSY1/CLIC1/COL5A2/COMP/CTHRC1/CTNNB1/CTSK/DCHS1/EIF2AK3/EXT1/EXT2/FASN/FAT4/FGF18/FGR/GDF10/GJA1/GLI3/GPNMB/HDAC4/HSD17B4/ID1/ID3/IFITM1/IGF1/IGFBP3/IGFBP5/IL6/JUNB/KLF10/LEP/LRP5/MEF2C/MGP/MMP2/OMD/OSR1/PENK/PSMC2/RANBP3L/RHOA/RRBP1/RUNX2/SFRP1/SKI/SLC8A1/SMAD3/SMURF1/SNRNP200/SORT1/SPARC/SRGN/TGFB1/TGFB2/TGFB3/TMEM38B/TNC/WWTR1/ZMPSTE24	68
GO:0006006	glucose metabolic process	42/1842	204/17913	8.72075e-06	0.000186575	0.000128398	ACACB/AKT1/ALDH5A1/ALDOA/ALDOC/ATF3/BPGM/C1QTNF1/ENO1/ENO3/EP300/FOXO1/GAA/GOT1/GPD2/GPI/GSK3B/IGF1/IGFBP3/IGFBP4/IGFBP5/INPP5K/LEP/LEPR/LRP5/MDH1/MDH2/MIDN/MLYCD/OMA1/PDHA1/PDHB/PDK4/PFKL/PFKM/PGAM2/PIK3CA/RGN/SORBS1/TKTL1/TP53/ZMPSTE24	42
GO:0003009	skeletal muscle contraction	14/1842	37/17913	8.72848e-06	0.000186575	0.000128398	ATP2A2/CASQ1/CAV3/DMPK/GAA/KCNJ2/MB/MYH14/MYH7/TCAP/TNNC1/TNNI2/TNNT1/TNNT3	14
GO:0034333	adherens junction assembly	24/1842	90/17913	8.8872e-06	0.000189284	0.000130263	ACTN1/ACTN2/AJUBA/BCL2/COL16A1/CTNNB1/DAPK3/DLG5/EPHA3/FAM107A/HIPK1/LDB1/MAP4K4/PEAK1/PHLDB2/PPM1F/RHOA/S100A10/SFRP1/SMAD3/SORBS1/THBS1/THY1/VCL	24
GO:0010881	regulation of cardiac muscle contraction by regulation of the release of sequestered calcium ion	11/1842	24/17913	9.23891e-06	0.00019537	0.00013445	ATP1A2/CACNA1C/CALM2/HRC/MIR1-1/MIR133A1/MIR133A2/PLN/RYR2/SLC8A1/TMEM38B	11
GO:0086064	cell communication by electrical coupling involved in cardiac conduction	11/1842	24/17913	9.23891e-06	0.00019537	0.00013445	ATP1A1/ATP1A2/ATP1A3/ATP1B1/CACNA1C/CALM2/GJA1/HRC/PDE4D/RYR2/SLC8A1	11
GO:0018108	peptidyl-tyrosine phosphorylation	62/1842	346/17913	9.49959e-06	0.000200168	0.000137752	ABI1/ACE/AGT/APP/ARHGEF2/AXL/CAMKK2/CD44/CRLF1/DDR1/DOK7/DYRK1B/EGF/EPHA3/ERRFI1/FBXW7/FES/FGF7/FGR/FYN/HBEGF/HCK/HCLS1/HYAL2/IGF1/IGF1R/IL6/INPP5F/ITGA5/ITGB2/JAK2/LEP/LILRA5/LRRK1/LYN/MAP2K1/MAP2K2/MAP2K5/MIR221/MVP/NCK2/NOX4/PDGFRA/PDGFRB/PEAK1/PECAM1/PPP2CA/PRKCD/PTPN1/ROR1/SFRP1/SHC1/SOCS1/STAT3/TGFB1/THBS4/THY1/TNFRSF1A/TP53/TSLP/TTN/WEE1	62
GO:0016311	dephosphorylation	77/1842	458/17913	9.65259e-06	0.00020267	0.000139474	AGTR2/ALPL/ATP1A1/B3GAT3/BCL2/BOD1/CA3/CALM2/CD2BP2/CDCA2/CTDSP2/CTTNBP2NL/CYCS/DMPK/DUSP1/DUSP16/DUSP23/DUSP26/DUSP28/DUSP5/FARP1/FBXW11/GSK3B/HTT/IGFBP3/INPP4B/INPP5F/INPP5K/JAK2/LGALS3/MASTL/MEF2C/MTMR3/MYH6/MYO1D/NT5C2/NT5DC1/NUAK1/PDGFRB/PHACTR1/PLEK/PPM1D/PPM1F/PPP1R14B/PPP1R1A/PPP1R1C/PPP1R26/PPP1R3C/PPP1R9B/PPP2CA/PPP2R2A/PPP2R3B/PPP2R5A/PPP2R5C/PRKCD/PTPN1/PTPN11/PTPN14/PTPN21/PTPN3/PTPN…	77
GO:0051353	positive regulation of oxidoreductase activity	17/1842	52/17913	9.72668e-06	0.000203504	0.000140048	AGT/AGTR1/AGTR2/AKT1/APOE/ATP7A/CHCHD10/CYBA/EDN1/EDN2/FXN/KRAS/NPR3/RFK/RGN/SNCA/TERF2	17
GO:0006883	cellular sodium ion homeostasis	8/1842	13/17913	9.85945e-06	0.000204913	0.000141018	AGT/AGTR2/ATP1A1/ATP1A2/ATP1A3/ATP1B1/ATP1B3/SLC8A1	8
GO:0014911	positive regulation of smooth muscle cell migration	16/1842	47/17913	9.86324e-06	0.000204913	0.000141018	AGT/AIF1/ATP7A/BCL2/DOCK4/FOXO4/HDAC4/IGF1/IGFBP5/MIR20A/MIR221/MIR451A/NOX4/NR4A3/PDGFRB/POSTN	16
GO:0001666	response to hypoxia	63/1842	354/17913	1.01127e-05	0.000209362	0.000144079	ACAA2/AGTRAP/AJUBA/AKT1/ANKRD1/APOLD1/ATP1B1/ATP7A/BCL2/BNIP3/CASP3/CREBBP/CRYAB/CXCR4/CYBA/CYBB/DDIT4/DNM1L/EDN1/EDNRA/EGR1/ENDOG/ENO1/EP300/GATA6/HIGD1A/HIPK2/HMOX2/HP1BP3/ITPR1/KCNA5/LEP/LMNA/LONP1/LOXL2/MB/MECP2/MTHFR/MYC/MYOCD/NDRG1/NOX4/NPPA/OPA1/PENK/PLAU/POSTN/PSMA3/PSMC2/RAF1/RHOA/RYR2/SFRP1/SLC2A1/SLC8A1/SMAD3/TGFB1/TGFB2/TGFB3/TGFBR3/THBS1/TP53/WTIP	63
GO:2000146	negative regulation of cell motility	62/1842	347/17913	1.04303e-05	0.000215184	0.000148086	ADAMTS9/AGTR2/AIF1/AKT1/APOE/ARHGDIB/ARID2/BCL2/BMP10/BST2/CCL2/CYP1B1/DLG5/DPYSL3/DUSP1/EMILIN1/FRMD5/GPR173/HYAL2/IDH2/IFITM1/IGFBP3/IGFBP5/KLF4/MAP2K5/MECP2/MEF2C/MIR133A1/MIR133A2/MIR20A/MIR221/MIR29A/MIR451A/MITF/MMP28/MMRN2/MYOCD/NAV3/PHLDB2/PTPRR/RAP2A/RECK/RGN/RHOA/RRAS/SERPINE1/SERPINF1/SFRP1/SLIT2/STARD13/STAT3/SULF1/TBX5/TGFB1/THBS1/THY1/TIMP1/TPM1/TRIB1/VASH1/VCL/WAS	62
GO:0072350	tricarboxylic acid metabolic process	13/1842	33/17913	1.09145e-05	0.000224392	0.000154423	DLD/FAHD1/FH/IDH2/MDH2/ME3/NNT/PDHA1/PDHB/SDHA/SDHD/SUCLA2/SUCLG1	13
GO:0072329	monocarboxylic acid catabolic process	28/1842	115/17913	1.10178e-05	0.000225732	0.000155345	ABCD3/ACAA1/ACAA2/ACACB/ACADVL/ACOT8/ACOX2/ACOX3/AIG1/AKT1/ALDH5A1/CEL/CPT1B/DECR1/ECI2/EHHADH/ETFB/ETFDH/GCDH/HADHB/HSD17B4/IDUA/LEP/MLYCD/PCCA/PLA2G15/PLIN5/SCP2	28
GO:0050867	positive regulation of cell activation	58/1842	319/17913	1.16444e-05	0.000237747	0.000163613	AIF1/AKT1/APP/AXL/BCL2/BCL6/CCL2/CD209/CDKN1A/CORO1A/CTSC/CYLD/F2RL1/FCER1G/FGR/FYN/GAB2/GATA2/GLI3/HAVCR2/HLA-DPB1/IGF1/IL1RL1/IL6/ITGB2/JAK2/KARS/LEP/LILRA5/LYN/MAP3K8/MEF2C/MLH1/NCK2/NFKBIZ/NPPA/NR4A3/PDCD1/PDGFRB/PIK3CA/PIK3R6/PLEK/PRKCQ/PTPN11/RHOA/SLC39A10/SOCS1/SOX15/STAT5B/TFRC/TGFB1/THBS1/THY1/TSLP/TYROBP/VAMP8/XBP1/ZMIZ1	58
GO:0032412	regulation of ion transmembrane transporter activity	46/1842	234/17913	1.19522e-05	0.000243192	0.000167361	ACTN2/AHNAK/APP/ATP1A2/ATP1B1/ATP1B3/ATP7A/CACNA2D1/CACNB2/CALM2/CAPN1/CASQ1/CAV3/CCL2/CHCHD10/FGF12/FHL1/FMR1/GPD1L/GRIA3/HRC/HSPA2/HTT/JPH2/KCNAB1/KCNIP2/KLHL24/MEF2C/MIR1-1/MIR133A1/MIR133A2/NPPA/OSR1/PDE4D/PKD2/PLN/PTPN3/RGN/RNF207/RYR2/SCN2B/SLMAP/TESC/WNK2/WWP2/YWHAH	46
GO:0006090	pyruvate metabolic process	33/1842	147/17913	1.21402e-05	0.000245858	0.000169195	ALDOA/ALDOC/BPGM/BSG/DDIT4/DLD/ENO1/ENO3/GALK1/GPI/HDAC4/IGF1/LDHA/LDHB/ME3/MPC2/NR4A3/NUP188/NUP214/NUPR1/PDHA1/PDHB/PDK4/PFKL/PFKM/PGAM2/POM121C/PRKAG2/SLC16A1/SLC16A3/STAT3/TP53/VDAC1	33
GO:0051057	positive regulation of small GTPase mediated signal transduction	18/1842	58/17913	1.21662e-05	0.000245858	0.000169195	APOA1/AUTS2/F2R/F2RL1/HRAS/IGF1/JAK2/KRAS/LYN/MAP4K4/MAPRE2/NOTCH2/PDGFRB/RAPGEF1/SHC1/SHOC2/SOS1/SYNPO2L	18
GO:0032984	protein-containing complex disassembly	55/1842	298/17913	1.24377e-05	0.000250488	0.000172382	ACTN2/ARHGEF2/ARID2/BNIP3/CALCOCO2/CHCHD10/CLN3/CTNNB1/DDIT4/DVL3/ERAL1/F2RL1/FYCO1/FZD2/GSK3B/GSN/HIST3H2A/HSPA8/IGF1R/IRAK3/LAMP2/LMOD2/MAP1B/MRPL1/MRPL16/MRPL3/MRPL35/MRPL38/MRPL44/MRPL50/MRPL52/MRPS14/MRPS18A/MRPS22/MRPS31/MRPS36/MRPS9/MTIF3/MTRF1/MTRF1L/MYC/NAV3/PLEK/PLEKHH2/SH3GL2/SMARCA4/SMARCC2/SMCR8/SPTAN1/SPTBN1/SWAP70/UPF1/VAMP8/VPS33A/ZMPSTE24	55
GO:0018212	peptidyl-tyrosine modification	62/1842	349/17913	1.25508e-05	0.00025191	0.00017336	ABI1/ACE/AGT/APP/ARHGEF2/AXL/CAMKK2/CD44/CRLF1/DDR1/DOK7/DYRK1B/EGF/EPHA3/ERRFI1/FBXW7/FES/FGF7/FGR/FYN/HBEGF/HCK/HCLS1/HYAL2/IGF1/IGF1R/IL6/INPP5F/ITGA5/ITGB2/JAK2/LEP/LILRA5/LRRK1/LYN/MAP2K1/MAP2K2/MAP2K5/MIR221/MVP/NCK2/NOX4/PDGFRA/PDGFRB/PEAK1/PECAM1/PPP2CA/PRKCD/PTPN1/ROR1/SFRP1/SHC1/SOCS1/STAT3/TGFB1/THBS4/THY1/TNFRSF1A/TP53/TSLP/TTN/WEE1	62
GO:0010644	cell communication by electrical coupling	12/1842	29/17913	1.31389e-05	0.000262128	0.000180392	ATP1A1/ATP1A2/ATP1A3/ATP1B1/CACNA1C/CALM2/DBN1/GJA1/HRC/PDE4D/RYR2/SLC8A1	12
GO:0060562	epithelial tube morphogenesis	57/1842	313/17913	1.31485e-05	0.000262128	0.000180392	AGT/AGTR2/AR/ARHGAP35/ARL13B/BCL2/CAV3/CCL11/COL4A1/CTHRC1/CTNNB1/CXCR4/DCHS1/DDR1/DEAF1/DLG5/EDN1/EDNRA/EGF/ESR1/FAT4/FZD2/GATA4/GJA1/GLI3/GZF1/IRX2/IRX3/KDM5B/KLHL3/KRAS/MEF2C/MTHFR/MYC/NKX2-5/OSR1/PKD2/PLXNB2/PRICKLE1/PROX1/RALA/RDH10/RHOA/RNF207/RYR2/SFRP1/SKI/SLIT2/SMAD3/SOX18/SOX4/STARD13/TCAP/TGFB1/TGFB2/TNC/YAP1	57
GO:0007599	hemostasis	60/1842	336/17913	1.46546e-05	0.000291173	0.000200381	ACTB/ANXA5/APOE/C1QTNF1/CD59/CD9/CLIC1/COMP/DGKH/DOCK1/DTNBP1/EDN1/EHD2/ENTPD1/F13A1/F2R/F2RL1/F2RL2/F8/FAP/FCER1G/FYN/GATA2/GATA4/GATA6/GNA15/GNAQ/GPI/IL6/ITPR1/ITPR3/JAK2/LYN/MAFK/MFN2/MYH9/NOS3/PAFAH2/PDGFRA/PHF21A/PIK3CA/PIK3CG/PIK3R6/PLAU/PLEK/PRKCD/PRKCH/PRKCQ/PROS1/PTPN11/RAF1/SERPINA5/SERPINE1/SERPINE2/THBS1/TLN1/TSPAN32/VCL/VWF/WAS	60
GO:0010460	positive regulation of heart rate	11/1842	25/17913	1.4966e-05	0.00029508	0.00020307	ATP2A2/EDN1/EDN2/HEY2/HRC/MIR1-1/NPPA/PDE4D/RGS4/RYR2/TPM1	11
GO:0043406	positive regulation of MAP kinase activity	48/1842	250/17913	1.50182e-05	0.00029508	0.00020307	AJUBA/CXCR4/DUSP5/DVL3/EDN1/EGF/F2R/FGD2/FGF18/FPR1/GADD45A/GADD45B/GADD45G/GDF15/GRM1/HRAS/IGF1/JAK2/KARS/KIDINS220/KRAS/MAP2K1/MAP2K2/MAP2K5/MAP3K3/MAP3K6/MAP3K8/MAPK8IP3/MAPKAPK3/MDFIC/NOX4/PDE5A/PDGFRB/PIK3CG/PIK3R6/PLCE1/PTPN1/PTPN11/RAF1/RAPGEF1/S100A12/SASH1/SHC1/TGFB1/TGFB3/THBS1/TPD52L1/TRAF7	48
GO:0034620	cellular response to unfolded protein	29/1842	123/17913	1.50193e-05	0.00029508	0.00020307	ACADVL/ATF3/ATF6B/BAG3/CCL2/CCND1/COPS5/CREB3L2/CTDSP2/CUL7/DCTN1/DDIT3/EIF2AK3/EP300/EXTL1/GOSR2/IGFBP1/LMNA/NCK2/PACRG/PTPN1/RHBDD1/SEC31A/SHC1/SRPRB/TLN1/TSPYL2/WIPI1/XBP1	29
GO:0072006	nephron development	32/1842	142/17913	1.50505e-05	0.00029508	0.00020307	ACAT1/AGT/AGTR2/BCL2/CTNNB1/DCHS1/EGR1/FAT4/GLI3/GPR4/GZF1/HEYL/IRX2/IRX3/KLHL3/MEF2C/MYC/MYO1E/NID1/OSR1/PDGFRA/PDGFRB/PECAM1/PKD2/PLCE1/PROM1/SEC61A1/SULF1/SULF2/TGFB1/WWTR1/YAP1	32
GO:0031960	response to corticosteroid	34/1842	155/17913	1.52186e-05	0.00029739	0.000204659	AGL/AGTR2/AIF1/AIFM1/ALPL/BCL2/CASP3/CCND1/CDKN1A/CYBA/CYBB/DDIT4/DUSP1/EDN1/ERRFI1/FAM107A/FBXO32/FIBIN/FOS/FOSB/FOXO1/GLB1/GOT1/IGFBP7/IL6/KRAS/MAOB/RHOA/SERPINF1/SLIT2/SPARC/TGFB1/TRIM63/ZFP36	34
GO:0051235	maintenance of location	53/1842	286/17913	1.57918e-05	0.000307576	0.000211669	ACACB/AKT1/APOA1/APOE/ATP1A2/BCL3/BSCL2/CACNA1C/CALM2/CASQ1/CORO1A/CYBA/DBN1/DDIT3/DGAT1/DIAPH1/F2R/FBN1/FBXW7/FITM1/FLNB/GAA/GSN/HRC/HTT/IL6/ITPR1/JPH2/LEP/LYN/MIR1-1/MIR133A1/MIR133A2/NFKBIA/PDE4D/PKD2/PLIN5/PLN/RANGAP1/RYR2/S100A8/S100A9/SLC30A2/SLC30A3/SLC8A1/SNCA/SRGN/STAT5B/TGFB1/THY1/TLN1/TMEM38B/ZC3H12A	53
GO:0032103	positive regulation of response to external stimulus	57/1842	315/17913	1.59542e-05	0.000309721	0.000213145	AGT/AGTR1/AIF1/APP/CEBPB/CMKLR1/CTSC/CXCR4/CYBA/EDN1/EDN2/F2RL1/FCER1G/FGF18/HAVCR2/HYAL2/IL17D/IL1RL1/IL6/ITGB2/JAK2/KARS/LDLR/LILRA5/LRSAM1/LY96/MIR221/NFKBIA/NFKBIZ/NPPA/NUPR1/OSMR/PDGFRB/PIK3CG/PLA2G2A/PPM1F/RAC2/S100A12/S100A8/S100A9/SASH1/SERPINE1/SLIT2/SMAD3/SMOC2/SNCA/STAT5B/SUCNR1/SWAP70/TGFB1/THBS1/THBS4/TNFRSF1A/TNIP1/TSLP/UNC13B/VAMP8	57
GO:0098901	regulation of cardiac muscle cell action potential	13/1842	34/17913	1.60131e-05	0.000309848	0.000213232	ATP2A2/CACNA1C/CAV3/CTNNA3/CXADR/DSP/HCN4/MIR1-1/MIR133A1/MIR133A2/RNF207/RYR2/SLMAP	13
GO:0051216	cartilage development	38/1842	182/17913	1.64386e-05	0.000317045	0.000218185	ATP7A/BMP10/BMP8A/CD44/CHRDL2/CHSY1/COL27A1/COMP/CREB3L2/CTNNB1/CTSK/EDN1/EIF2AK3/FBXW4/FGF18/FRZB/GLG1/GLI3/HYAL2/LEP/LOXL2/LUM/MEF2C/MGP/MSX1/MUSTN1/OSR1/PRRX1/RELA/RUNX2/SERPINH1/SMAD3/SULF1/SULF2/TGFB1/TIMP1/ZEB1/ZMPSTE24	38
GO:0001101	response to acid chemical	59/1842	330/17913	1.65797e-05	0.000318728	0.000219343	ADCY6/AIFM1/AKR1C1/AKT1/ATP2B4/ATP7A/BCL11A/CASP3/CD9/CEBPB/COL16A1/COL18A1/COL4A1/COL5A2/CYBA/CYBB/DUSP1/EDN1/EGR1/EPHA3/FOXO1/FYN/GJA1/GNPAT/GSN/GSS/HAMP/ID3/IGFBP7/IPO5/KLF2/KLF4/KRT8/LDLR/LEP/LYN/MMP2/MTHFR/NME1/OPA1/OSR1/PDGFRA/PDGFRB/PDK4/PID1/PKD2/RELA/RHOA/SERPINF1/SFRP1/SOCS1/SPARC/TESC/TGFBR3/TNC/XBP1/YAP1/ZC3H12A/ZEB1	59
GO:0030324	lung development	36/1842	169/17913	1.71725e-05	0.000329057	0.000226452	ATP7A/ATXN1L/CIC/CRISPLD2/CTNNB1/DLG5/EDN2/EP300/ERRFI1/FBXW7/FGF18/FGF7/GATA6/GLI3/HEG1/ID1/IGFBP5/KLF2/KRAS/MAN2A1/MAP2K1/MME/MYOCD/NOS3/PDGFRA/PDGFRB/PROX1/RAB3A/RDH10/SPARC/TBX5/TGFB3/TMEM38B/TNC/TNS3/YAP1	36
GO:0009165	nucleotide biosynthetic process	63/1842	360/17913	1.74045e-05	0.000332427	0.000228771	ACACB/ACAT1/ACSL3/ACSS2/ADCY3/ADCY4/ADCY6/ADK/ADSSL1/AGPAT2/ALDOA/ALDOC/BPGM/DDIT4/DLD/ENO1/ENO3/FASN/GALK1/GCDH/GPI/GUCA1C/HAAO/HDAC4/IDH2/IGF1/KARS/LCLAT1/LDHA/MLYCD/MPC2/NADK/NADK2/NAMPT/NME1/NNMT/NOS3/NPPA/NPPB/NUP188/NUP214/NUPR1/PANK3/PAPSS1/PDHA1/PDHB/PDK4/PFKL/PFKM/PGAM2/PID1/POM121C/PRKAG2/RFK/SCD/SNCA/STAT3/TAMM41/TAZ/TGFB1/TP53/UCK1/UCK2	63
GO:0007519	skeletal muscle tissue development	34/1842	156/17913	1.7567e-05	0.000334144	0.000229952	ACTA1/ATF3/BCL2/BTG2/CASQ1/CSRP3/CTNNB1/EGR1/EP300/FLNB/FOS/HDAC4/HEYL/HLF/KCNAB1/KLF5/MEF2C/MIR1-1/MYH14/MYL3/MYLK2/MYOCD/MYOM1/MYOZ2/NUPR1/RBM24/RHOA/SKI/SMYD1/SVIL/TAZ/TGFB1/TLL2/ZBTB18	34
GO:0010975	regulation of neuron projection development	76/1842	458/17913	1.76073e-05	0.000334144	0.000229952	ADCY6/AGT/AKT1/ANKRD1/APOE/ARHGAP35/ARHGDIA/BAG5/BCL11A/BRSK1/CAMSAP2/CHN1/CPNE5/CREB3L2/CUL7/CUX1/CXCR4/CYFIP1/DBN1/DLG5/DNM1L/DPYSL3/DVL3/EP300/EPHA3/FBXO38/FES/FKBP4/FMR1/FN1/FYN/GSK3B/ID1/INPP5F/KALRN/KIDINS220/KIF13B/KLF4/LYN/MAP1B/MAP2/MAP2K1/MAP4K4/MEF2C/MIR221/NME1/OPA1/PDLIM5/PLK2/PLXNB2/PRRX1/PTPN9/PTPRD/RAP1GAP2/RAP2A/RAPGEF1/RGMA/RGS2/RHOA/RTN4/RTN4IP1/S100A9/SERPINF1/SFRP1/SIPA1L1/SK…	76
GO:0038179	neurotrophin signaling pathway	14/1842	39/17913	1.76878e-05	0.000334599	0.000230265	AGT/AGTR2/CASP3/CORO1A/CYFIP1/DDIT4/DOK5/KIDINS220/PTPN11/RAF1/RAPGEF1/SLC9A6/SORT1/SOS1	14
GO:0007596	blood coagulation	59/1842	331/17913	1.81961e-05	0.000343118	0.000236128	ACTB/ANXA5/APOE/C1QTNF1/CD59/CD9/CLIC1/COMP/DGKH/DOCK1/DTNBP1/EDN1/EHD2/ENTPD1/F13A1/F2R/F2RL1/F2RL2/F8/FAP/FCER1G/FYN/GATA2/GATA4/GATA6/GNA15/GNAQ/IL6/ITPR1/ITPR3/JAK2/LYN/MAFK/MFN2/MYH9/NOS3/PAFAH2/PDGFRA/PHF21A/PIK3CA/PIK3CG/PIK3R6/PLAU/PLEK/PRKCD/PRKCH/PRKCQ/PROS1/PTPN11/RAF1/SERPINA5/SERPINE1/SERPINE2/THBS1/TLN1/TSPAN32/VCL/VWF/WAS	59
GO:0003209	cardiac atrium morphogenesis	12/1842	30/17913	1.98541e-05	0.000373195	0.000256827	BMP10/GATA4/HEG1/HEY2/MYH6/NKX2-5/NOTCH2/PROX1/SOS1/SOX4/TBX5/TGFB2	12
GO:0030336	negative regulation of cell migration	59/1842	332/17913	1.99572e-05	0.000373944	0.000257343	ADAMTS9/AGTR2/AIF1/AKT1/APOE/ARHGDIB/ARID2/BCL2/BMP10/BST2/CCL2/CYP1B1/DLG5/DPYSL3/DUSP1/EMILIN1/GPR173/HYAL2/IDH2/IFITM1/IGFBP3/IGFBP5/KLF4/MAP2K5/MECP2/MEF2C/MIR133A1/MIR133A2/MIR20A/MIR221/MIR29A/MIR451A/MITF/MMP28/MMRN2/MYOCD/NAV3/PHLDB2/PTPRR/RAP2A/RECK/RHOA/RRAS/SERPINE1/SERPINF1/SFRP1/SLIT2/STARD13/STAT3/SULF1/TBX5/TGFB1/THBS1/THY1/TIMP1/TPM1/TRIB1/VASH1/VCL	59
GO:0060401	cytosolic calcium ion transport	34/1842	157/17913	2.02423e-05	0.00037809	0.000260195	ATP1A2/ATP2A2/ATP2B4/BCL2/CACNA1C/CACNA2D1/CALM2/CASQ1/CORO1A/CYBA/DDIT3/DIAPH1/F2R/FYN/HRC/HTT/ITPR1/ITPR3/JPH2/LYN/MICU2/MIR1-1/MIR133A1/MIR133A2/OPA1/PDE4D/PKD2/PLN/RYR2/SLC8A1/SNCA/TGFB1/THY1/TMEM38B	34
GO:0043271	negative regulation of ion transport	32/1842	144/17913	2.0322e-05	0.000378386	0.000260399	ACTN2/AGTR2/AKT1/ATP1A2/ATP7A/BCL2/CALM2/CAV3/FGF12/FMR1/INPP5K/KCNAB1/LEP/MAOB/MIR1-1/MIR133A1/MIR133A2/NOS3/OSR1/PKD2/PLA2R1/PLN/RGS2/RGS4/SERPINE2/SFRP4/SLC30A1/SNCA/TGFB1/THBS1/TRIM27/YWHAQ	32
GO:0040013	negative regulation of locomotion	65/1842	377/17913	2.09303e-05	0.000388489	0.000267352	ADAMTS9/AGTR2/AIF1/AKT1/APOE/ARHGDIB/ARID2/BCL2/BMP10/BST2/CCL2/CYP1B1/DLG5/DPYSL3/DUSP1/EMILIN1/FRMD5/GPR173/HYAL2/IDH2/IFITM1/IGFBP3/IGFBP5/KLF4/MAP2K5/MECP2/MEF2C/MIR133A1/MIR133A2/MIR20A/MIR221/MIR29A/MIR451A/MITF/MMP28/MMRN2/MYOCD/NAV3/PHLDB2/PTPRR/RAP2A/RECK/RGN/RHOA/RRAS/SERPINE1/SERPINF1/SFRP1/SLIT2/STARD13/STAT3/SULF1/TBX5/TGFB1/THBS1/THY1/TIMP1/TPM1/TRIB1/TRIM27/TRIM35/TRIM8/VASH1/VCL/W…	65
GO:0014808	release of sequestered calcium ion into cytosol by sarcoplasmic reticulum	13/1842	35/17913	2.30866e-05	0.000425844	0.000293059	ATP1A2/CACNA1C/CALM2/CASQ1/HRC/MIR1-1/MIR133A1/MIR133A2/PDE4D/PLN/RYR2/SLC8A1/TMEM38B	13
GO:0060323	head morphogenesis	13/1842	35/17913	2.30866e-05	0.000425844	0.000293059	ARID5B/CRISPLD2/EP300/MMP2/MSX1/PDGFRA/PTPN11/RRAS/SGPL1/SKI/TGFB1/TGFB3/TIPARP	13
GO:0007369	gastrulation	37/1842	178/17913	2.34043e-05	0.000430363	0.000296169	APOA1/COL12A1/COL4A2/COL5A2/COL7A1/COL8A1/CTNNB1/DLD/EXT1/EXT2/FN1/GATA6/ITGA5/ITGB1/ITGB2/ITGB4/ITGB5/KDM6B/KLF4/LAMB1/LDB1/MAP2K5/MBP/MIR1-1/MIR221/MMP15/MMP2/NR4A3/OSR1/PHLDB1/PHLDB2/POU5F1/SFRP1/SMAD3/SOX7/TP53/TXNRD1	37
GO:0001706	endoderm formation	16/1842	50/17913	2.39588e-05	0.000439195	0.000302247	COL12A1/COL4A2/COL5A2/COL7A1/COL8A1/CTNNB1/FN1/GATA6/ITGA5/ITGB2/ITGB5/LAMB1/MMP15/MMP2/POU5F1/SOX7	16
GO:0097553	calcium ion transmembrane import into cytosol	29/1842	126/17913	2.4425e-05	0.000446358	0.000307177	ATP1A2/ATP2B4/CACNA1C/CACNA2D1/CALM2/CASQ1/CORO1A/CYBA/DDIT3/DIAPH1/F2R/FYN/HRC/HTT/ITPR1/JPH2/LYN/MIR1-1/MIR133A1/MIR133A2/PDE4D/PKD2/PLN/RYR2/SLC8A1/SNCA/TGFB1/THY1/TMEM38B	29
GO:1990778	protein localization to cell periphery	51/1842	276/17913	2.45408e-05	0.000447096	0.000307685	ACSL3/ACTB/ACTN2/AKT1/AR/ATP1B1/ATP1B3/BSG/CACNB2/CAV3/CLIP3/CLSTN1/CNPY4/CSRP3/DCHS1/EHD2/EPHA3/FCER1G/GPC6/GRASP/HRAS/INPP5K/ITGB1/KIF13A/LGALS3/NKD2/NUMA1/PACS1/PALM/PICALM/PID1/PLEKHF1/PPP2R5A/PRKCH/PTPN9/RAMP1/RAP2A/RHOQ/S100A10/SEC16A/SLMAP/SMURF1/SORBS1/SPTBN1/TESC/TGFB1/TMBIM1/TNFRSF1A/TSPAN5/VAMP3/VAMP8	51
GO:0035987	endodermal cell differentiation	15/1842	45/17913	2.48199e-05	0.000450793	0.000310229	COL12A1/COL4A2/COL5A2/COL7A1/COL8A1/CTNNB1/FN1/GATA6/ITGA5/ITGB2/ITGB5/LAMB1/MMP15/MMP2/POU5F1	15
GO:0051384	response to glucocorticoid	31/1842	139/17913	2.52411e-05	0.000457042	0.000314529	AGL/AGTR2/AIF1/ALPL/BCL2/CASP3/CCND1/CDKN1A/DDIT4/DUSP1/EDN1/ERRFI1/FAM107A/FBXO32/FIBIN/FOS/FOSB/FOXO1/GLB1/GOT1/IGFBP7/IL6/KRAS/MAOB/RHOA/SERPINF1/SLIT2/SPARC/TGFB1/TRIM63/ZFP36	31
GO:0071229	cellular response to acid chemical	40/1842	199/17913	2.53687e-05	0.000457951	0.000315155	ADCY6/AKR1C1/AKT1/ATP7A/BCL11A/CEBPB/COL16A1/COL4A1/COL5A2/CYBA/CYBB/EDN1/EGR1/EPHA3/FYN/HAMP/ID3/IPO5/KLF2/KLF4/LDLR/LEP/LYN/MMP2/NME1/OPA1/OSR1/PDGFRA/PDK4/PID1/PKD2/SERPINF1/SFRP1/SOCS1/TESC/TNC/XBP1/YAP1/ZC3H12A/ZEB1	40
GO:0048660	regulation of smooth muscle cell proliferation	36/1842	172/17913	2.56669e-05	0.000461925	0.00031789	AGT/AIF1/AKT1/CALCRL/CDKN1A/CNN1/CTNNB1/CYBA/EDN1/HBEGF/HDAC4/IGF1/IGFBP3/IGFBP5/IL6/JAK2/JUN/KLF4/MEF2C/MFN2/MIR1-1/MIR133A1/MIR133A2/MIR20A/MIR221/MMP2/MYOCD/NAMPT/NPR3/NR4A3/PDGFRB/TGFB3/THBS1/TPM1/TRIB1/XRCC6	36
GO:0044342	type B pancreatic cell proliferation	10/1842	22/17913	2.60594e-05	0.00046757	0.000321774	ERRFI1/IGFBP3/IGFBP4/IGFBP5/NR4A3/NUPR1/SERPINB1/SFRP1/SGPP2/SIDT2	10
GO:0031669	cellular response to nutrient levels	43/1842	220/17913	2.62244e-05	0.000468406	0.00032235	AIFM1/ATF3/BCL11A/BCL2/CBL/CD68/CDKN1A/CYBA/CYBB/DNM1L/EIF2AK3/FAM107A/FES/FOXO1/FYN/HIGD1A/HSPA8/IFI16/IMPACT/JUN/KANK2/KLF10/LAMP2/LEP/MTMR3/NAMPT/OPA1/PDK4/PENK/PIM1/POSTN/PPM1D/RNF152/SFRP1/SLC2A1/SLC38A2/TNC/TP53/ULK1/WDR45B/WIPI1/XBP1/ZC3H12A	43
GO:0050673	epithelial cell proliferation	71/1842	425/17913	2.62643e-05	0.000468406	0.00032235	AGTR1/AKT1/APOA1/APOE/AR/ATP7A/CCL11/CCL2/CCND1/CDKN1C/CEBPB/COL8A1/CTNNB1/CYBA/DEAF1/ERRFI1/ESR1/FAP/FBXW7/FGF7/GATA2/GJA1/HMGB2/HRAS/HTRA1/ID1/IGF1/IGFBP3/IGFBP4/IGFBP5/IRF6/JUN/KDM5B/LAMB1/LEP/LOXL2/MAP2K1/MAP2K5/MEF2C/MIR29A/MYC/NME1/NOTCH2/NR4A3/NRAS/NUPR1/OSR1/PROX1/RGN/RTN4/SCN5A/SERPINB1/SERPINF1/SFRP1/SGPP2/SIDT2/SMAD3/SP1/SPARC/STAT3/SULF1/SULF2/TGFB1/TGFB2/TGFBR3/THBS1/THBS4/VASH1/XBP1…	71
GO:1901293	nucleoside phosphate biosynthetic process	63/1842	365/17913	2.69267e-05	0.000478779	0.000329488	ACACB/ACAT1/ACSL3/ACSS2/ADCY3/ADCY4/ADCY6/ADK/ADSSL1/AGPAT2/ALDOA/ALDOC/BPGM/DDIT4/DLD/ENO1/ENO3/FASN/GALK1/GCDH/GPI/GUCA1C/HAAO/HDAC4/IDH2/IGF1/KARS/LCLAT1/LDHA/MLYCD/MPC2/NADK/NADK2/NAMPT/NME1/NNMT/NOS3/NPPA/NPPB/NUP188/NUP214/NUPR1/PANK3/PAPSS1/PDHA1/PDHB/PDK4/PFKL/PFKM/PGAM2/PID1/POM121C/PRKAG2/RFK/SCD/SNCA/STAT3/TAMM41/TAZ/TGFB1/TP53/UCK1/UCK2	63
GO:0005996	monosaccharide metabolic process	51/1842	277/17913	2.71332e-05	0.000481004	0.000331019	ABHD10/ACACB/AKT1/ALDH5A1/ALDOA/ALDOC/ATF3/BPGM/C1QTNF1/CYB5A/CYB5R3/ENO1/ENO3/EP300/FOXO1/GAA/GALK1/GLB1/GOT1/GPD2/GPI/GSK3B/IGF1/IGFBP3/IGFBP4/IGFBP5/INPP5K/LEP/LEPR/LRP5/MDH1/MDH2/MIDN/MLYCD/MPI/OMA1/PDHA1/PDHB/PDK4/PFKL/PFKM/PGAM2/PIK3CA/RGN/SLC2A1/SLC2A3/SORBS1/TKT/TKTL1/TP53/ZMPSTE24	51
GO:0060541	respiratory system development	39/1842	193/17913	2.81002e-05	0.000496547	0.000341715	ALDH1A3/ATP7A/ATXN1L/CIC/CRISPLD2/CTNNB1/DLG5/EDN2/EP300/ERRFI1/FBXW7/FGF18/FGF7/GATA6/GLI3/HEG1/ID1/IGFBP5/KCNAB1/KLF2/KRAS/MAN2A1/MAP2K1/MME/MYOCD/NOS3/PDGFRA/PDGFRB/PROX1/RAB3A/RDH10/SKI/SPARC/TBX5/TGFB3/TMEM38B/TNC/TNS3/YAP1	39
GO:0060420	regulation of heart growth	22/1842	84/17913	2.81776e-05	0.000496547	0.000341715	ACACB/BMP10/CAV3/EDN1/GATA6/GJA1/HAMP/HEY2/IGF1/MEF2C/MEIS1/MIR1-1/MIR590/MYH6/NKX2-5/PIM1/PROX1/RGS2/RGS4/TBX5/TGFBR3/YAP1	22
GO:0048871	multicellular organismal homeostasis	77/1842	472/17913	2.84886e-05	0.000500537	0.000344462	ACACB/ACADVL/ACTB/ADCY3/ADCY4/ADCY6/ADRB1/AZGP1/BCL2/BMP8A/BSCL2/CEBPB/CMKLR1/CORO1A/CRTC3/CTNNB1/CTSK/CXADR/CXCR4/CYP11B2/DDIT3/DECR1/DIO2/EDN2/EGR1/EHMT1/F2R/FH/FOXO1/G0S2/GADD45G/GATA2/GATM/GCNT2/GJA1/GRB10/HAMP/HDAC3/HYAL2/ID1/IGF1R/IL18R1/IL6/INPP5K/IP6K1/IRX3/JAK2/KDM6B/KRAS/LDB1/LEP/LEPR/LRRK1/LYZ/MFN2/NOS3/NOX4/NPR3/NR4A3/OMA1/PDK4/PIK3CA/PLEKHM1/PROM1/PTPN11/RAC2/SCD/SERPINA3/SGIP1/SLC22…	77
GO:0007044	cell-substrate junction assembly	24/1842	96/17913	2.87114e-05	0.000502959	0.000346128	ACTN1/ACTN2/AJUBA/BCL2/COL16A1/DAPK3/EPHA3/FAM107A/FN1/ITGA5/ITGB4/LDB1/MAP4K4/PEAK1/PHLDB2/PPM1F/RHOA/S100A10/SFRP1/SMAD3/SORBS1/THBS1/THY1/TLN1	24
GO:0050729	positive regulation of inflammatory response	33/1842	153/17913	2.90346e-05	0.000507121	0.000348993	AGT/AGTR1/APP/CEBPB/CTSC/FCER1G/HYAL2/IL17D/IL1RL1/IL6/ITGB2/JAK2/KARS/LDLR/LILRA5/NFKBIA/NFKBIZ/NPPA/NUPR1/OSMR/PIK3CG/PLA2G2A/S100A12/S100A8/S100A9/SERPINE1/SNCA/STAT5B/SUCNR1/TNFRSF1A/TNIP1/TSLP/VAMP8	33
GO:0030323	respiratory tube development	36/1842	173/17913	2.92567e-05	0.000509497	0.000350628	ATP7A/ATXN1L/CIC/CRISPLD2/CTNNB1/DLG5/EDN2/EP300/ERRFI1/FBXW7/FGF18/FGF7/GATA6/GLI3/HEG1/ID1/IGFBP5/KLF2/KRAS/MAN2A1/MAP2K1/MME/MYOCD/NOS3/PDGFRA/PDGFRB/PROX1/RAB3A/RDH10/SPARC/TBX5/TGFB3/TMEM38B/TNC/TNS3/YAP1	36
GO:0086011	membrane repolarization during action potential	12/1842	31/17913	2.93722e-05	0.000510007	0.000350979	ATP1A1/ATP1B1/CACNA2D1/KCNA5/KCNE4/KCNIP2/KCNJ2/KCNJ8/MIR1-1/MIR133A1/MIR133A2/RNF207	12
GO:0050817	coagulation	59/1842	337/17913	3.13729e-05	0.000543154	0.00037379	ACTB/ANXA5/APOE/C1QTNF1/CD59/CD9/CLIC1/COMP/DGKH/DOCK1/DTNBP1/EDN1/EHD2/ENTPD1/F13A1/F2R/F2RL1/F2RL2/F8/FAP/FCER1G/FYN/GATA2/GATA4/GATA6/GNA15/GNAQ/IL6/ITPR1/ITPR3/JAK2/LYN/MAFK/MFN2/MYH9/NOS3/PAFAH2/PDGFRA/PHF21A/PIK3CA/PIK3CG/PIK3R6/PLAU/PLEK/PRKCD/PRKCH/PRKCQ/PROS1/PTPN11/RAF1/SERPINA5/SERPINE1/SERPINE2/THBS1/TLN1/TSPAN32/VCL/VWF/WAS	59
GO:0051153	regulation of striated muscle cell differentiation	27/1842	115/17913	3.16035e-05	0.000543969	0.000374351	BCL2/BMP10/CAV3/DMPK/EDN1/EHD2/GDF15/HAMP/HDAC4/IGF1/MAML1/MEF2C/MIR1-1/MIR133A1/MIR133A2/MIR590/MSX1/MYLK3/MYOCD/NKX2-5/PROX1/RBM24/RGS2/RGS4/SMYD1/TGFB1/XBP1	27
GO:1902305	regulation of sodium ion transmembrane transport	16/1842	51/17913	3.16037e-05	0.000543969	0.000374351	ATP1A2/ATP1B1/ATP1B3/ATP2B4/CAV3/FGF12/GPD1L/KLHL24/OSR1/PTPN3/SCN2B/SCN5A/SLMAP/TESC/WNK2/YWHAH	16
GO:0007492	endoderm development	20/1842	73/17913	3.18032e-05	0.000545817	0.000375623	COL12A1/COL4A2/COL5A2/COL7A1/COL8A1/CTNNB1/EXT1/FN1/GATA4/GATA6/ITGA5/ITGB2/ITGB5/LAMB1/MMP15/MMP2/POU5F1/SMAD3/SOX7/TGFB1	20
GO:1903514	release of sequestered calcium ion into cytosol by endoplasmic reticulum	13/1842	36/17913	3.27495e-05	0.000560432	0.000385681	ATP1A2/CACNA1C/CALM2/CASQ1/HRC/MIR1-1/MIR133A1/MIR133A2/PDE4D/PLN/RYR2/SLC8A1/TMEM38B	13
GO:0009260	ribonucleotide biosynthetic process	51/1842	279/17913	3.30886e-05	0.000564605	0.000388552	ACACB/ACAT1/ACSL3/ACSS2/ADCY3/ADCY4/ADCY6/ADK/ADSSL1/ALDOA/ALDOC/BPGM/DDIT4/DLD/ENO1/ENO3/FASN/GALK1/GCDH/GPI/HDAC4/IGF1/LDHA/MLYCD/MPC2/NME1/NPPA/NPPB/NUP188/NUP214/NUPR1/PANK3/PAPSS1/PDHA1/PDHB/PDK4/PFKL/PFKM/PGAM2/PID1/POM121C/PRKAG2/RFK/SCD/SNCA/STAT3/TAZ/TGFB1/TP53/UCK1/UCK2	51
GO:0048659	smooth muscle cell proliferation	36/1842	174/17913	3.32989e-05	0.00056656	0.000389897	AGT/AIF1/AKT1/CALCRL/CDKN1A/CNN1/CTNNB1/CYBA/EDN1/HBEGF/HDAC4/IGF1/IGFBP3/IGFBP5/IL6/JAK2/JUN/KLF4/MEF2C/MFN2/MIR1-1/MIR133A1/MIR133A2/MIR20A/MIR221/MMP2/MYOCD/NAMPT/NPR3/NR4A3/PDGFRB/TGFB3/THBS1/TPM1/TRIB1/XRCC6	36
GO:1905209	positive regulation of cardiocyte differentiation	14/1842	41/17913	3.39097e-05	0.000575298	0.000395911	EDN1/GATA4/GATA6/HAMP/IGF1/MEF2C/MIR1-1/MIR133A1/MIR133A2/MYOCD/NKX2-5/TBX5/TGFB1/TGFB2	14
GO:1905475	regulation of protein localization to membrane	37/1842	181/17913	3.43257e-05	0.000580693	0.000399623	ACSL3/ACTB/AKT1/AR/BCL2/CLIP3/CNPY4/CSRP3/EPHA3/FYN/GPC6/GRASP/GSN/HRAS/INPP5K/ITGB1/ITGB2/LGALS3/MFF/NKD2/PDCD5/PICALM/PID1/PPP2R5A/PRKCH/PTPN9/RHOQ/SORBS1/SPTBN1/TGFB1/TMBIM1/TP53/TP53BP2/VAMP8/YWHAG/YWHAH/YWHAQ	37
GO:0060485	mesenchyme development	48/1842	258/17913	3.5079e-05	0.000591747	0.00040723	ACTA1/ACTC1/BCL2/CTNNB1/CUL7/DCHS1/DLG5/EDN1/EDNRA/EPHA3/FAM172A/FBXL17/FN1/FRZB/GATA4/GCNT2/GSK3B/HEY2/HEYL/IL6/KLHL12/LOXL2/MEF2C/MIR221/MIR590/MSX1/MYC/NKX2-5/NOS3/OSR1/PDGFRB/PHLDB1/PHLDB2/PKD2/PPP2CA/RANBP3L/RBM24/RDH10/RTN4/SFRP1/SMAD3/TBX5/TGFB1/TGFB2/TGFB3/TGFBR3/WWTR1/YAP1	48
GO:1902904	negative regulation of supramolecular fiber organization	28/1842	122/17913	3.53598e-05	0.000593103	0.000408164	APOE/ARAP1/ARHGEF2/CAV3/CLIP3/CORO1A/CRYAB/EMILIN1/FHOD3/FKBP4/GSN/HSPA8/INPP5K/LDLR/LMOD2/MAP1B/MAP2/MIR20A/NAV3/PHLDB2/PLEKHH2/PRKCD/SLIT2/SNCA/SPTAN1/SPTBN1/SWAP70/WAS	28
GO:1903409	reactive oxygen species biosynthetic process	28/1842	122/17913	3.53598e-05	0.000593103	0.000408164	AGT/AGTR2/AIF1/AKT1/ATP2B4/CYBA/CYBB/CYP1B1/EDN1/FYN/GLA/HDAC4/ITGB2/JAK2/KLF2/KLF4/MAOB/MIR590/NOS3/NOX4/PKD2/RGN/RHOA/SIRPA/SMAD3/SNCA/STAT3/ZC3H12A	28
GO:0035967	cellular response to topologically incorrect protein	30/1842	135/17913	3.63898e-05	0.000608656	0.000418867	ACADVL/ATF3/ATF6B/BAG3/CCL2/CCND1/COPS5/CREB3L2/CTDSP2/CUL7/DCTN1/DDIT3/EIF2AK3/EP300/EXTL1/GOSR2/IGFBP1/LMNA/NCK2/PACRG/PTPN1/RHBDD1/SDF2L1/SEC31A/SHC1/SRPRB/TLN1/TSPYL2/WIPI1/XBP1	30
GO:0006631	fatty acid metabolic process	59/1842	339/17913	3.74312e-05	0.00062431	0.00042964	ABCD3/ACAA1/ACAA2/ACACB/ACAD9/ACADVL/ACOT8/ACOX2/ACOX3/ACSF2/ACSL3/ACSS2/AIG1/AKT1/ALDH5A1/ALOX5/ALOX5AP/CEL/CPT1B/CYP1B1/CYP2J2/CYP4V2/DECR1/DLD/ECI2/EDN1/EDN2/EHHADH/ETFB/ETFDH/FASN/GCDH/GSTM4/HADHB/HSD17B4/LEP/MLYCD/NAAA/NDUFAB1/NDUFS6/NR4A3/PCCA/PDK4/PLA2G15/PLA2G4C/PLIN5/PRKAG2/PTGR2/RGN/SCD/SCP2/SGPL1/SNCA/TBXAS1/THEM4/TNFRSF1A/TYRP1/XBP1/ZADH2	59
GO:0046686	response to cadmium ion	17/1842	57/17913	3.75602e-05	0.000624701	0.000429909	AKT1/ATP7A/CYB5A/CYBB/FOS/GOT1/GSN/GSS/HAAO/JUN/MT1A/MT1E/MT1G/MT1X/NPC1/SLC30A1/SPARC	17
GO:0010721	negative regulation of cell development	56/1842	317/17913	3.81127e-05	0.000632116	0.000435012	ADCY6/APOE/APP/ARHGDIA/ARHGEF2/BAG5/BCL11A/BCL2/CAV3/CTNNB1/DAAM2/DICER1/DIXDC1/DPYSL3/EIF4ENIF1/FBN1/FBXW7/FKBP4/FRZB/GLI3/GPR173/GSK3B/HOOK3/ID1/IDH2/IGF1/IL6/INPP5F/IRX3/KCTD11/LDLR/MAP2/MAP4K4/MEIS1/PLK2/POSTN/PTPN9/RAP1GAP2/RGMA/RGS2/RGS4/RHOA/RTN4/S1PR3/SKI/SLIT2/SPOCK1/SPP1/SRGAP2C/STAT3/TGFB1/THY1/TP53/TRAK2/ULK2/YWHAH	56
GO:0071214	cellular response to abiotic stimulus	55/1842	310/17913	3.93885e-05	0.000649636	0.000447069	ADSSL1/AGT/AKT1/ANKRD1/ARHGEF2/ATP1A1/ATP1A2/BAG3/BNIP3/CASP3/CDKN1A/CREBBP/CRYAB/CYBA/EFHD1/EGR1/ELK1/EP300/ERRFI1/FMR1/GADD45A/GJA1/GOT1/GRM1/GUCA1C/HAMP/HDAC4/HIST3H2A/HRAS/HYAL2/IFI16/IMPACT/KCNJ2/LTBR/MFAP4/MME/MYC/NAMPT/NOX4/NPPA/PALM/PKD2/PPID/PTPN11/RAB11FIP5/RHBDD1/SFRP1/SLC2A1/SLC38A2/TGFB1/TNFRSF1A/TP53/XRCC6/YAP1/ZMPSTE24	55
GO:0104004	cellular response to environmental stimulus	55/1842	310/17913	3.93885e-05	0.000649636	0.000447069	ADSSL1/AGT/AKT1/ANKRD1/ARHGEF2/ATP1A1/ATP1A2/BAG3/BNIP3/CASP3/CDKN1A/CREBBP/CRYAB/CYBA/EFHD1/EGR1/ELK1/EP300/ERRFI1/FMR1/GADD45A/GJA1/GOT1/GRM1/GUCA1C/HAMP/HDAC4/HIST3H2A/HRAS/HYAL2/IFI16/IMPACT/KCNJ2/LTBR/MFAP4/MME/MYC/NAMPT/NOX4/NPPA/PALM/PKD2/PPID/PTPN11/RAB11FIP5/RHBDD1/SFRP1/SLC2A1/SLC38A2/TGFB1/TNFRSF1A/TP53/XRCC6/YAP1/ZMPSTE24	55
GO:0048638	regulation of developmental growth	57/1842	325/17913	4.02865e-05	0.000662601	0.000455991	ACACB/ADRB1/AGRN/AKT1/APOE/APP/AR/BCL11A/BCL2/BMP10/CAV3/CDKN1A/CPNE5/CXCR4/CYFIP1/EDN1/FN1/FOXS1/FXN/GATA6/GDF15/GJA1/GSK3B/HAMP/HEY2/IGF1/LEP/MAP1B/MAP2/MEF2C/MEIS1/MIR1-1/MIR590/MYH6/NKX2-5/PIK3CA/PIM1/PROX1/RGS2/RGS4/RTN4/SFRP1/SGPL1/SMURF1/SOCS2/SOX15/SPP1/STAT3/STAT5B/SYT17/TBX5/TGFBR3/TLL2/ULK2/WWC1/YAP1/ZMPSTE24	57
GO:0033540	fatty acid beta-oxidation using acyl-CoA oxidase	8/1842	15/17913	4.07851e-05	0.000667096	0.000459085	ACAA1/ACOT8/ACOX2/ACOX3/ECI2/EHHADH/HSD17B4/SCP2	8
GO:0033617	mitochondrial respiratory chain complex IV assembly	8/1842	15/17913	4.07851e-05	0.000667096	0.000459085	BCS1L/COX14/COX16/COX20/SCO1/SCO2/SURF1/TIMM21	8
GO:0009743	response to carbohydrate	43/1842	224/17913	4.10467e-05	0.000669526	0.000460757	ANO1/CALCRL/CASP3/COL6A2/CYBA/EGR1/EIF2B3/ENDOG/GATA4/GJA1/GOT1/HMGN3/LEP/LYN/MAP1B/MAP4K4/MIR221/MPC2/NADK/NAMPT/NDUFAF2/NME1/NOX4/OPA1/OXCT1/PFKL/PIK3CA/RAB11FIP5/RAF1/RHOA/RMI1/SERPINF1/SIDT2/SIN3A/SLC8A1/SMARCA4/SOX4/SPARC/TGFB1/THBS1/UNC13B/VSNL1/XBP1	43
GO:0090130	tissue migration	62/1842	363/17913	4.28818e-05	0.000697535	0.000480033	ACTA1/ACTC1/ADAMTS9/AGT/AGTR2/AKT1/AMOTL1/APOA1/APOE/BMP10/CYP1B1/DOCK1/EDN1/FAP/FBXW7/FGF18/FGF7/GATA2/GPI/HBEGF/ID1/ITGB1/ITGB2/JUN/KANK2/KLF4/LOXL2/MAP2K5/MAP3K3/MAP4K4/MAPRE2/MECP2/MEF2C/MIR20A/MIR221/MIR29A/MMRN2/MYH9/NOS3/PECAM1/PIK3CA/PLK2/PPM1F/PROX1/PTPN11/PTPRR/PXN/RHOA/RTN4/SASH1/SERPINF1/SLIT2/SMOC2/SOX18/SP1/SPARC/STARD13/TGFB1/TGFB2/THBS1/VASH1/ZC3H12A	62
GO:0070371	ERK1 and ERK2 cascade	52/1842	289/17913	4.3116e-05	0.000699424	0.000481332	AGT/APOE/APP/ATF3/BRAF/CCL11/CD44/DUSP1/DUSP26/EGF/EMILIN1/ERRFI1/F2R/F2RL1/FBXW7/FGF18/FN1/GATA4/GCNT2/GPNMB/HAVCR2/HRAS/IGF1/JUN/KARS/KLF4/LYN/MAP2K1/MAP2K2/MARCO/MIR133A1/MIR133A2/MIR221/MYC/NOTCH2/NOX4/PDGFRA/PDGFRB/PLA2G2A/PTPN1/PTPN11/PTPRR/RAPGEF1/RRAS/SHC1/SIRPA/SPRY4/TGFB1/TNFAIP8L3/TNIP1/TRAF7/WNK2	52
GO:0019318	hexose metabolic process	45/1842	239/17913	4.50158e-05	0.000728247	0.000501168	ACACB/AKT1/ALDH5A1/ALDOA/ALDOC/ATF3/BPGM/C1QTNF1/ENO1/ENO3/EP300/FOXO1/GAA/GALK1/GLB1/GOT1/GPD2/GPI/GSK3B/IGF1/IGFBP3/IGFBP4/IGFBP5/INPP5K/LEP/LEPR/LRP5/MDH1/MDH2/MIDN/MLYCD/MPI/OMA1/PDHA1/PDHB/PDK4/PFKL/PFKM/PGAM2/PIK3CA/RGN/SORBS1/TKTL1/TP53/ZMPSTE24	45
GO:0016999	antibiotic metabolic process	29/1842	130/17913	4.52195e-05	0.000729549	0.000502064	ACSS2/ADH1A/AKR1C1/ALDH2/ALDH5A1/CYBA/CYBB/CYP4B1/DLD/FAHD1/FH/FYN/IDH2/MAOB/MDH2/ME3/MMP3/NNT/PDHA1/PDHB/PXDN/PXDNL/RAC2/SDHA/SDHD/SNCA/STAT3/SUCLA2/SUCLG1	29
GO:0048017	inositol lipid-mediated signaling	34/1842	163/17913	4.5731e-05	0.000735796	0.000506363	AGT/AKT1/CBL/EDN1/F2R/F2RL1/FGR/FYN/GAB2/GSN/HCLS1/HCST/IER3/IGF1/IGF1R/INPP5F/JAK2/KLF4/LEP/LYN/MIR20A/NPR3/PDGFRA/PDGFRB/PIK3CA/PIK3CG/PIK3IP1/PPP2R5C/PREX2/RHOA/SERPINE2/TGFB2/TNFAIP8L3/UNC5B	34
GO:0051155	positive regulation of striated muscle cell differentiation	19/1842	69/17913	4.61019e-05	0.000737755	0.000507711	BCL2/BMP10/CAV3/EDN1/EHD2/GDF15/HAMP/IGF1/MAML1/MEF2C/MIR1-1/MIR133A1/MIR133A2/MYLK3/MYOCD/PROX1/RBM24/SMYD1/TGFB1	19
GO:0070509	calcium ion import	19/1842	69/17913	4.61019e-05	0.000737755	0.000507711	ATP2A2/ATP2B4/CACNA2D1/CACNB2/CAV3/CCL2/CTNNB1/EGF/FYN/LGALS3/MICU2/OPA1/PDGFRB/PKD2/PLN/SLC30A1/SLC8A1/TRIM27/ZMPSTE24	19
GO:0006644	phospholipid metabolic process	67/1842	402/17913	4.72244e-05	0.000753533	0.000518569	ACSL3/AGK/AGPAT2/AJUBA/ALDH5A1/APOA1/ARF3/CHPT1/CLN3/DGKH/ETNPPL/FGR/GATA6/GNPAT/GPD1L/HADHB/INPP1/INPP4B/INPP5F/INPP5K/IP6K1/KLF4/LCLAT1/LDLR/LIPG/LPCAT3/LPCAT4/LYN/MECP2/MTMR12/MTMR3/PDGFRA/PDGFRB/PGAP1/PGS1/PI4K2A/PIGG/PIK3CA/PIK3CG/PIK3IP1/PIK3R6/PLA2G15/PLA2G2A/PLA2G4C/PLD6/PLEK/PLEKHA4/PMVK/PRDX6/PRKCD/PTDSS1/PTDSS2/SERINC3/SLC44A1/SLC44A2/SMPD1/SNCA/SOCS1/SOCS2/SPTLC2/STARD7/SYNJ2/TAMM41/T…	67
GO:0048771	tissue remodeling	35/1842	170/17913	4.73424e-05	0.000753533	0.000518569	ACE/AGT/AGTR2/ATP7A/AXL/CAPN1/CTHRC1/CTNNB1/CTSK/F2R/GJA1/GPNMB/IGFBP5/IL6/LEP/LEPR/LRRK1/MEF2C/MIR20A/MITF/NOS3/NOTCH2/NOX4/PDK4/PLEKHM1/RAC2/SFRP1/TFRC/TGFB1/TGFB3/THBS4/TIMP1/TMBIM1/TNFRSF11B/TP53	35
GO:1904589	regulation of protein import	17/1842	58/17913	4.80893e-05	0.00076337	0.000525339	AGTR2/BAG3/GLI3/HCLS1/HDAC3/HSPA8/HYAL2/IPO5/LEP/MDFIC/PDCD5/PKIG/PRKCD/SMAD3/TGFB1/UBR5/ZC3H12A	17
GO:0034976	response to endoplasmic reticulum stress	47/1842	254/17913	4.8444e-05	0.000766943	0.000527798	ACADVL/AIFM1/ATF3/ATF6B/ATP2A2/BCL2/CCL2/CCND1/CEBPB/COPS5/CREB3L2/CTDSP2/CUL7/DCTN1/DDIT3/EIF2AK3/EP300/EXTL1/GOSR2/GSK3B/IGFBP1/ITPR1/JUN/LMNA/NCK2/NRBF2/NUPR1/OPA1/PTPN1/RHBDD1/SDF2L1/SEC16A/SEC31A/SERINC3/SHC1/SRPRB/THBS1/THBS4/TLN1/TMEM67/TP53/TSPYL2/UBQLN2/UBXN8/USP14/WIPI1/XBP1	47
GO:0043087	regulation of GTPase activity	68/1842	410/17913	4.86366e-05	0.000767939	0.000528483	ADAP2/ADRB1/AGRN/AJUBA/ARAP1/ARHGAP1/ARHGAP24/ARHGAP35/ARHGDIA/ARHGDIB/ARHGEF12/ASAP2/BCL6/CCL11/CHN1/DNM1L/DOCK1/DOCK2/DOCK4/DVL3/EPHA3/ERRFI1/EVI5/F2R/F2RL1/FAM13B/FGD2/FGD5/GARNL3/GNAQ/GSK3B/HRAS/IPO5/IQGAP2/ITGB1/JUN/KALRN/MAP4K4/MAPRE2/PICALM/PLXNB2/PREX2/RABGAP1/RALGAPA2/RANBP3L/RANGAP1/RAP1GAP/RAP1GAP2/RAPGEF1/RGN/RGS1/RGS2/RGS3/RGS4/RGS6/RIC8B/RIN2/S100A10/SEC23B/SFRP1/SIPA1L1/SLIT2/SMAP2…	68
GO:1901216	positive regulation of neuron death	23/1842	93/17913	5.02026e-05	0.000788461	0.000542606	AIFM1/BACE1/CASP3/CTNNB1/DDIT3/DDIT4/EGR1/ELK1/FBXW7/FOS/FYN/GSK3B/HDAC4/ITGB2/JUN/NUPR1/PICALM/RHOA/SNCA/TGFB2/TP53/TP53BP2/TYROBP	23
GO:1903076	regulation of protein localization to plasma membrane	23/1842	93/17913	5.02026e-05	0.000788461	0.000542606	ACSL3/ACTB/AKT1/AR/CLIP3/CNPY4/CSRP3/EPHA3/GRASP/ITGB1/LGALS3/NKD2/PICALM/PID1/PPP2R5A/PRKCH/PTPN9/RHOQ/SORBS1/SPTBN1/TGFB1/TMBIM1/VAMP8	23
GO:0046390	ribose phosphate biosynthetic process	51/1842	284/17913	5.36004e-05	0.000832142	0.000572667	ACACB/ACAT1/ACSL3/ACSS2/ADCY3/ADCY4/ADCY6/ADK/ADSSL1/ALDOA/ALDOC/BPGM/DDIT4/DLD/ENO1/ENO3/FASN/GALK1/GCDH/GPI/HDAC4/IGF1/LDHA/MLYCD/MPC2/NME1/NPPA/NPPB/NUP188/NUP214/NUPR1/PANK3/PAPSS1/PDHA1/PDHB/PDK4/PFKL/PFKM/PGAM2/PID1/POM121C/PRKAG2/RFK/SCD/SNCA/STAT3/TAZ/TGFB1/TP53/UCK1/UCK2	51
GO:0010921	regulation of phosphatase activity	35/1842	171/17913	5.37399e-05	0.000832142	0.000572667	AGTR2/B3GAT3/BOD1/CALM2/CD2BP2/DMPK/FARP1/GSK3B/HTT/IGFBP3/JAK2/LGALS3/MASTL/MEF2C/MYO1D/NUAK1/PDGFRB/PHACTR1/PLEK/PPP1R14B/PPP1R1A/PPP1R1C/PPP1R26/PPP1R3C/PPP1R9B/PPP2R2A/PPP2R3B/PPP2R5A/PPP2R5C/RGN/SH3RF2/SHOC2/SLC39A10/SMAD3/TGFB2	35
GO:0086013	membrane repolarization during cardiac muscle cell action potential	11/1842	28/17913	5.385e-05	0.000832142	0.000572667	ATP1A1/ATP1B1/KCNA5/KCNE4/KCNIP2/KCNJ2/KCNJ8/MIR1-1/MIR133A1/MIR133A2/RNF207	11
GO:1990776	response to angiotensin	11/1842	28/17913	5.385e-05	0.000832142	0.000572667	ACTN2/AGT/AGTR1/AGTR2/AGTRAP/ARID1B/CAMK2A/CYBA/CYBB/PRKCD/RELA	11
GO:0030968	endoplasmic reticulum unfolded protein response	26/1842	112/17913	5.39677e-05	0.000832142	0.000572667	ACADVL/ATF3/ATF6B/CCL2/CCND1/COPS5/CREB3L2/CTDSP2/CUL7/DCTN1/DDIT3/EIF2AK3/EP300/EXTL1/GOSR2/IGFBP1/LMNA/NCK2/PTPN1/SEC31A/SHC1/SRPRB/TLN1/TSPYL2/WIPI1/XBP1	26
GO:0051209	release of sequestered calcium ion into cytosol	26/1842	112/17913	5.39677e-05	0.000832142	0.000572667	ATP1A2/CACNA1C/CALM2/CASQ1/CORO1A/CYBA/DDIT3/DIAPH1/F2R/HRC/HTT/ITPR1/JPH2/LYN/MIR1-1/MIR133A1/MIR133A2/PDE4D/PKD2/PLN/RYR2/SLC8A1/SNCA/TGFB1/THY1/TMEM38B	26
GO:0051283	negative regulation of sequestering of calcium ion	26/1842	112/17913	5.39677e-05	0.000832142	0.000572667	ATP1A2/CACNA1C/CALM2/CASQ1/CORO1A/CYBA/DDIT3/DIAPH1/F2R/HRC/HTT/ITPR1/JPH2/LYN/MIR1-1/MIR133A1/MIR133A2/PDE4D/PKD2/PLN/RYR2/SLC8A1/SNCA/TGFB1/THY1/TMEM38B	26
GO:0097193	intrinsic apoptotic signaling pathway	50/1842	277/17913	5.51035e-05	0.000847448	0.0005832	AIFM1/AKT1/ARHGEF2/BAG5/BCL2/BCL3/BNIP3/CASP3/CCAR2/CD44/CDKN1A/CEBPB/CYLD/CYP1B1/DDIT3/DDIT4/DNM1L/EIF2AK3/ENO1/EP300/FBXW7/FHIT/HIPK1/HIPK2/HRAS/IFI16/ITPR1/IVNS1ABP/JAK2/MLH1/MLLT11/MSX1/NCK2/NUPR1/OPA1/PLEKHF1/PPM1F/PRKCD/PRKRA/PTPN1/S100A8/S100A9/SERINC3/SKIL/TAF9/TNFRSF1A/TP53/TP53BP2/VDAC2/XBP1	50
GO:0030879	mammary gland development	30/1842	138/17913	5.62707e-05	0.000863157	0.000594011	AKT1/AR/ARHGAP35/ATP7A/CAPN1/CAV3/CCL11/CCND1/CEBPB/DDR1/DEAF1/EGF/ESR1/FASN/GJA1/GLI3/IGFBP5/IRF6/JAK2/KALRN/KDM5B/LBH/MSX1/NME1/RTN4/SOCS2/STAT5B/TGFB1/TGFB3/XBP1	30
GO:0010506	regulation of autophagy	55/1842	314/17913	5.65615e-05	0.000865376	0.000595538	AKT1/ATG13/ATP13A2/ATP6V0E2/BAG3/BCL2/BNIP3/CALCOCO2/CAMKK2/CAPN1/CASP3/DAPK3/DDIT3/DNM1L/EP300/FBXW7/FOXO1/FYCO1/GATA4/GOLGA2/GSK3B/HTT/IFI16/ITPR1/KDM4A/LEP/LEPR/LRSAM1/MFN2/MTMR3/NAMPT/NPC1/NUPR1/PIK3CA/PLEKHF1/PLK2/PRKAG2/RNF152/SCOC/SMCR8/SMURF1/SNCA/SPTLC2/STAT3/SUPT5H/TP53/TRIM8/UBQLN2/UCHL1/ULK1/USP10/VDAC1/XBP1/ZC3H12A/ZMPSTE24	55
GO:0042110	T cell activation	72/1842	443/17913	5.78458e-05	0.000882744	0.00060749	AIF1/AKT1/ATP7A/BCL2/BCL3/BCL6/CASP3/CCL2/CD209/CD44/CEBPB/CORO1A/CTNNB1/CXADR/CYLD/DDOST/DLG5/DOCK2/EGR1/F2RL1/FYN/GJA1/GLI3/GPNMB/GSN/HAVCR2/HLA-DPB1/IGF1/IL18R1/IL6/KIF13B/LCP1/LEP/LEPR/LGALS3/LRRC32/LYN/MAFB/MAP3K8/MSN/MYH9/NCK2/NFKBIZ/NRARP/PAG1/PDCD1/PDE5A/PIK3CA/PIK3CG/PIK3R6/PRKCQ/PTPN11/RAC2/RHOA/RUNX2/SH3RF1/SMAD3/SOCS1/SOS1/SOX4/STAT3/STAT5B/TFRC/TGFB1/THY1/TP53/VSIG4/WAS/XBP1/ZC3H12A/…	72
GO:0010171	body morphogenesis	15/1842	48/17913	5.84392e-05	0.000888837	0.000611683	ARID5B/CRISPLD2/EP300/MMP2/MSX1/PDGFRA/PHLDB1/PHLDB2/PTPN11/RRAS/SGPL1/SKI/TGFB1/TGFB3/TIPARP	15
GO:2001237	negative regulation of extrinsic apoptotic signaling pathway	24/1842	100/17913	5.85453e-05	0.000888837	0.000611683	AKT1/AR/ARHGEF2/BCL2/FYN/HMGB2/HTT/IGF1/LGALS3/LMNA/MAP2K5/MIR221/NOS3/RAF1/RELA/SERPINE1/SH3RF1/STRADB/THBS1/TMBIM1/UNC5B/YAP1/ZC3HC1/ZMYND11	24
GO:0060538	skeletal muscle organ development	34/1842	165/17913	5.92337e-05	0.000896989	0.000617293	ACTA1/ATF3/BCL2/BTG2/CASQ1/CSRP3/CTNNB1/EGR1/EP300/FLNB/FOS/HDAC4/HEYL/HLF/KCNAB1/KLF5/MEF2C/MIR1-1/MYH14/MYL3/MYLK2/MYOCD/MYOM1/MYOZ2/NUPR1/RBM24/RHOA/SKI/SMYD1/SVIL/TAZ/TGFB1/TLL2/ZBTB18	34
GO:0060402	calcium ion transport into cytosol	31/1842	145/17913	5.96663e-05	0.000901236	0.000620216	ATP1A2/ATP2B4/BCL2/CACNA1C/CACNA2D1/CALM2/CASQ1/CORO1A/CYBA/DDIT3/DIAPH1/F2R/FYN/HRC/HTT/ITPR1/ITPR3/JPH2/LYN/MIR1-1/MIR133A1/MIR133A2/PDE4D/PKD2/PLN/RYR2/SLC8A1/SNCA/TGFB1/THY1/TMEM38B	31
GO:0110020	regulation of actomyosin structure organization	23/1842	94/17913	6.00817e-05	0.0009052	0.000622944	APOA1/ARAP1/BMP10/CAV3/EDN1/INPP5K/MEF2C/MIR1-1/MIR20A/MYLK3/NOX4/PHLDB2/PPM1F/PROX1/PXN/RHOA/S100A10/SFRP1/SMAD3/SYNPO2L/TGFB3/TPM1/WAS	23
GO:0001659	temperature homeostasis	35/1842	172/17913	6.09118e-05	0.000915378	0.000629949	ACADVL/ADRB1/BSCL2/CEBPB/CMKLR1/CXCR4/DDIT3/DECR1/DIO2/EDN2/EGR1/EHMT1/FH/FOXO1/G0S2/GADD45G/GATM/GJA1/GRB10/HDAC3/ID1/IGF1R/IL18R1/IP6K1/JAK2/KDM6B/LEP/LEPR/MFN2/NPR3/OMA1/SCD/STAT3/TLE3/ZNF423	35
GO:0007219	Notch signaling pathway	36/1842	179/17913	6.22321e-05	0.000928152	0.000638739	AKT1/APP/BCL6/CREBBP/EGF/EP300/FAT4/FBXW7/GATA2/GOT1/HEY2/HEYL/KCNA5/MAML1/MAML2/MAML3/MIB2/MYC/NEURL1B/NFKBIA/NOTCH2/NRARP/PGAM2/PLN/POSTN/S1PR3/SPEN/STAT3/TGFB1/TGFB2/TIMP4/TSPAN5/WWC1/WWP2/ZMIZ1/ZNF423	36
GO:0019362	pyridine nucleotide metabolic process	36/1842	179/17913	6.22321e-05	0.000928152	0.000638739	ALDOA/ALDOC/BPGM/DDIT4/DLD/ENO1/ENO3/GALK1/GPD1L/GPD2/GPI/HAAO/HDAC4/IDH2/IGF1/LDHA/MDH1/MDH2/MPC2/NADK/NADK2/NAMPT/NNMT/NUP188/NUP214/NUPR1/PDHA1/PDHB/PFKL/PFKM/PGAM2/POM121C/PRKAG2/STAT3/TKT/TP53	36
GO:0046496	nicotinamide nucleotide metabolic process	36/1842	179/17913	6.22321e-05	0.000928152	0.000638739	ALDOA/ALDOC/BPGM/DDIT4/DLD/ENO1/ENO3/GALK1/GPD1L/GPD2/GPI/HAAO/HDAC4/IDH2/IGF1/LDHA/MDH1/MDH2/MPC2/NADK/NADK2/NAMPT/NNMT/NUP188/NUP214/NUPR1/PDHA1/PDHB/PFKL/PFKM/PGAM2/POM121C/PRKAG2/STAT3/TKT/TP53	36
GO:0035329	hippo signaling	13/1842	38/17913	6.30474e-05	0.000932884	0.000641996	AJUBA/AMOTL1/CASP3/DCHS1/DLG5/FAT4/MARK3/TEAD4/TJP1/WTIP/WWC1/WWTR1/YAP1	13
GO:0086005	ventricular cardiac muscle cell action potential	13/1842	38/17913	6.30474e-05	0.000932884	0.000641996	CACNA1C/CAV3/CTNNA3/DSP/GPD1L/KCNE4/KCNJ8/MIR1-1/MIR133A1/MIR133A2/RNF207/RYR2/SCN5A	13
GO:1903523	negative regulation of blood circulation	13/1842	38/17913	6.30474e-05	0.000932884	0.000641996	AGTR2/ATP1A1/ATP1A2/ATP2A2/DOCK4/F2R/JAK2/LEP/PDE4D/PDE5A/PIK3CG/PLN/ZC3H12A	13
GO:0110053	regulation of actin filament organization	43/1842	228/17913	6.31829e-05	0.000932884	0.000641996	ACTN2/APOA1/ARAP1/ARHGAP35/ARPC1B/ARPC3/CCL11/CORO1A/CYFIP1/F2RL1/FCHSD2/FHOD3/GSN/HCK/HCLS1/ID1/INPP5K/IQGAP2/LMOD2/MIR20A/NCK2/NOX4/PHLDB2/PLEK/PLEKHG2/PLEKHH2/PPM1F/PRKCD/PXN/RGS4/RHOA/S100A10/SFRP1/SLIT2/SMAD3/SPTAN1/SPTBN1/SWAP70/SYNPO2L/TGFB3/TPM1/TRIM27/WAS	43
GO:1904375	regulation of protein localization to cell periphery	26/1842	113/17913	6.33372e-05	0.000932884	0.000641996	ACSL3/ACTB/AKT1/AR/CLIP3/CNPY4/CSRP3/EPHA3/GPC6/GRASP/HRAS/ITGB1/LGALS3/NKD2/NUMA1/PICALM/PID1/PPP2R5A/PRKCH/PTPN9/RHOQ/SORBS1/SPTBN1/TGFB1/TMBIM1/VAMP8	26
GO:0045765	regulation of angiogenesis	64/1842	383/17913	6.38624e-05	0.000938286	0.000645713	ADAMTS9/AGT/AGTR1/C6/CCL11/COL4A2/CTNNB1/CXCR4/CYBB/CYP1B1/EMILIN1/FBXW7/FGF18/FOXO4/GATA2/GATA4/GATA6/GPNMB/GPR4/HGS/HIPK1/HIPK2/HSPG2/ID1/IL6/ITGA5/ITGB1/ITGB2/KLF2/KLF4/LEP/MAP2K5/MAP3K3/MECP2/MIR1-1/MIR20A/MIR221/MIR29A/MIR451A/MMRN2/NOS3/NPPB/PIK3R6/PLK2/RECK/RHOA/RRAS/SASH1/SERPINE1/SERPINF1/SFRP1/SMOC2/SP1/SPARC/STARD13/STAT3/SULF1/TGFB2/THBS1/THBS4/VASH1/WARS/XBP1/ZC3H12A	64
GO:0034329	cell junction assembly	41/1842	214/17913	6.41624e-05	0.000939103	0.000646276	ACE/ACE2/ACTB/ACTN1/ACTN2/AGT/AJUBA/BCL2/CD9/COL16A1/CTNNB1/DAPK3/DLG5/EPHA3/FAM107A/FLNC/FN1/FSCN1/GJA1/GNPAT/HEG1/HIPK1/ITGA5/ITGB4/LDB1/MAP4K4/PEAK1/PHLDB2/PPM1F/PRKCH/RAPGEF1/RHOA/S100A10/SFRP1/SMAD3/SORBS1/THBS1/THY1/TJP1/TLN1/VCL	41
GO:0034284	response to monosaccharide	39/1842	200/17913	6.42352e-05	0.000939103	0.000646276	ANO1/CASP3/COL6A2/CYBA/EGR1/EIF2B3/ENDOG/GATA4/GJA1/HMGN3/LEP/MAP4K4/MIR221/MPC2/NADK/NAMPT/NDUFAF2/NME1/NOX4/OPA1/OXCT1/PFKL/PIK3CA/RAB11FIP5/RAF1/RHOA/RMI1/SERPINF1/SIDT2/SIN3A/SLC8A1/SMARCA4/SOX4/SPARC/TGFB1/THBS1/UNC13B/VSNL1/XBP1	39
GO:0120032	regulation of plasma membrane bounded cell projection assembly	34/1842	166/17913	6.7257e-05	0.000980858	0.000675011	AGRN/ARAP1/ARHGAP35/ATG3/ATP7A/ATP8B1/AUTS2/CDC42EP4/CYFIP1/CYLD/DPYSL3/F2RL1/FAM98A/FMR1/FSCN1/HDAC4/HRAS/HTT/IFT140/KCTD17/KLF5/MAP4/PALM/PLEKHM1/PRKCD/RAC2/RALA/RAP1GAP/RHOQ/SLIT2/SRGAP2C/TGFB3/VDAC3/WAS	34
GO:0003014	renal system process	27/1842	120/17913	6.97487e-05	0.0010147	0.000698299	ADCY3/ADCY4/ADCY6/AGT/AGTR1/AGTR2/BCL2/CORIN/CYBA/CYP11B2/EDN1/F2R/F2RL1/GJA1/GSN/HYAL2/INPP5K/KLHL3/MCAM/MLLT6/MYO1E/NPPB/NPR3/RHOA/SUCNR1/SULF1/SULF2	27
GO:0002237	response to molecule of bacterial origin	54/1842	309/17913	7.00652e-05	0.0010168	0.000699748	AKT1/ALPL/ANKRD1/ATP2A2/AXL/CASP3/CCL2/CD14/CD68/CEBPB/CTSG/CXCL2/EDN1/F2R/FOS/GJA1/HAMP/HAVCR2/HCK/HMGB2/IL6/IRAK3/JAK2/KCNJ8/LITAF/LY96/LYN/MAOB/MAPKAPK3/MEF2C/MGST1/MIR20A/NFKBIA/NOS3/OTUD5/PDE4D/PENK/RELA/RHOA/S100A8/SASH1/SERPINE1/SIRPA/SNCA/SPARC/SSC5D/TGFB1/TIMP4/TRIB1/TRIM41/UPF1/XBP1/ZC3H12A/ZFP36	54
GO:0019674	NAD metabolic process	19/1842	71/17913	7.07074e-05	0.00102307	0.000704058	ALDOA/ALDOC/BPGM/ENO1/ENO3/GPD1L/GPD2/GPI/HAAO/MDH1/MDH2/NADK/NADK2/NAMPT/NNMT/PFKL/PFKM/PGAM2/TP53	19
GO:0010631	epithelial cell migration	60/1842	354/17913	7.08423e-05	0.00102307	0.000704058	ADAMTS9/AGT/AGTR2/AKT1/AMOTL1/APOA1/APOE/BMP10/CYP1B1/DOCK1/EDN1/FAP/FBXW7/FGF18/FGF7/GATA2/GPI/HBEGF/ID1/ITGB1/ITGB2/JUN/KANK2/KLF4/LOXL2/MAP2K5/MAP3K3/MAP4K4/MAPRE2/MECP2/MEF2C/MIR20A/MIR221/MIR29A/MMRN2/MYH9/NOS3/PECAM1/PIK3CA/PLK2/PPM1F/PROX1/PTPN11/PTPRR/PXN/RHOA/RTN4/SASH1/SERPINF1/SLIT2/SMOC2/SOX18/SP1/SPARC/STARD13/TGFB1/TGFB2/THBS1/VASH1/ZC3H12A	60
GO:0043547	positive regulation of GTPase activity	58/1842	339/17913	7.10918e-05	0.00102417	0.000704819	ADAP2/ADRB1/AGRN/ARAP1/ARHGAP1/ARHGAP24/ARHGAP35/ARHGDIA/ARHGDIB/ARHGEF12/ASAP2/CCL11/CHN1/DNM1L/DOCK1/DOCK2/DOCK4/DVL3/ERRFI1/EVI5/F2R/F2RL1/FAM13B/GARNL3/GNAQ/GSK3B/HRAS/ITGB1/JUN/KALRN/MAP4K4/MAPRE2/PICALM/PREX2/RALGAPA2/RANBP3L/RANGAP1/RAP1GAP/RAP1GAP2/RAPGEF1/RGN/RGS1/RGS2/RGS3/RGS4/RGS6/RIC8B/RIN2/S100A10/SEC23B/SFRP1/SIPA1L1/SMAP2/SOS1/SRGAP1/STARD13/TBC1D20/THY1	58
GO:0002573	myeloid leukocyte differentiation	39/1842	201/17913	7.1937e-05	0.00103383	0.000711467	ANXA2/APP/C1QC/CEBPB/CTNNB1/F2RL1/FASN/FBN1/FBXW7/FCER1G/FES/FOS/GAB2/GATA2/HCLS1/IFI16/JUN/JUNB/KLF10/LRRK1/LTBR/LYN/MAFB/MEF2C/MITF/MT1G/MYC/MYH9/NME1/NOTCH2/PIAS3/SFRP1/SH3PXD2A/TESC/TFRC/TGFB1/TMEM178A/TRIB1/TYROBP	39
GO:0071260	cellular response to mechanical stimulus	20/1842	77/17913	7.29025e-05	0.00104517	0.00071927	AGT/AKT1/ANKRD1/ATP1A1/ATP1A2/BAG3/BNIP3/CYBA/GADD45A/GJA1/GOT1/HDAC4/KCNJ2/LTBR/NPPA/PTPN11/SLC2A1/SLC38A2/TGFB1/TNFRSF1A	20
GO:0006164	purine nucleotide biosynthetic process	50/1842	280/17913	7.31734e-05	0.00104652	0.000720199	ACACB/ACAT1/ACSL3/ACSS2/ADCY3/ADCY4/ADCY6/ADK/ADSSL1/ALDOA/ALDOC/BPGM/DDIT4/DLD/ENO1/ENO3/FASN/GALK1/GCDH/GPI/GUCA1C/HDAC4/IGF1/LDHA/MLYCD/MPC2/NME1/NOS3/NPPA/NPPB/NUP188/NUP214/NUPR1/PANK3/PAPSS1/PDHA1/PDHB/PDK4/PFKL/PFKM/PGAM2/PID1/POM121C/PRKAG2/SCD/SNCA/STAT3/TAZ/TGFB1/TP53	50
GO:0031346	positive regulation of cell projection organization	61/1842	362/17913	7.34751e-05	0.0010483	0.000721426	AGRN/AGT/ANKRD1/APOE/ARAP1/ARHGAP35/ARHGDIA/ATP7A/AUTS2/CDC42EP4/CPNE5/CREB3L2/CUL7/CUX1/CXCR4/CYFIP1/DBN1/DLG5/DNM1L/DPYSL3/DVL3/EP300/EPHA3/F2RL1/FAM98A/FBXO38/FES/FMR1/FN1/FSCN1/FYN/HDAC4/HRAS/HTT/KALRN/KCTD17/KIDINS220/LYN/MAP1B/MAP2K1/MIR221/NAV3/NME1/OPA1/PALM/PLEKHM1/PLXNB2/PTPRD/RAC2/RALA/RAPGEF1/RGS2/RHOA/RHOQ/S100A9/SERPINF1/SKIL/SLIT2/SMURF1/SYT17/TGFB3	61
GO:0048015	phosphatidylinositol-mediated signaling	33/1842	160/17913	7.41236e-05	0.00105273	0.000724473	AGT/AKT1/CBL/EDN1/F2R/F2RL1/FGR/FYN/GAB2/GSN/HCLS1/HCST/IER3/IGF1/IGF1R/INPP5F/JAK2/KLF4/LEP/LYN/MIR20A/NPR3/PDGFRA/PDGFRB/PIK3CA/PIK3CG/PIK3IP1/PPP2R5C/PREX2/RHOA/SERPINE2/TGFB2/UNC5B	33
GO:0051282	regulation of sequestering of calcium ion	26/1842	114/17913	7.4141e-05	0.00105273	0.000724473	ATP1A2/CACNA1C/CALM2/CASQ1/CORO1A/CYBA/DDIT3/DIAPH1/F2R/HRC/HTT/ITPR1/JPH2/LYN/MIR1-1/MIR133A1/MIR133A2/PDE4D/PKD2/PLN/RYR2/SLC8A1/SNCA/TGFB1/THY1/TMEM38B	26
GO:0017038	protein import	30/1842	140/17913	7.45025e-05	0.00105533	0.000726264	AGK/AGT/AGTR2/AKT1/APOE/BAG3/CDKN1A/GLI3/HCLS1/HDAC3/HSPA8/HYAL2/IPO5/IPO9/LAMP2/LEP/LMNA/MDFIC/NFKBIA/PDCD5/PKIG/PRICKLE1/PRKCD/SMAD3/STAT3/TGFB1/TIMM21/TP53/UBR5/ZC3H12A	30
GO:0032496	response to lipopolysaccharide	52/1842	295/17913	7.52084e-05	0.00106279	0.000731394	AKT1/ALPL/ANKRD1/ATP2A2/AXL/CASP3/CCL2/CD14/CD68/CEBPB/CTSG/EDN1/F2R/FOS/GJA1/HAMP/HAVCR2/HCK/HMGB2/IL6/IRAK3/JAK2/KCNJ8/LITAF/LY96/LYN/MAOB/MAPKAPK3/MEF2C/MGST1/MIR20A/NFKBIA/NOS3/OTUD5/PDE4D/PENK/RELA/RHOA/S100A8/SASH1/SERPINE1/SIRPA/SNCA/SPARC/TGFB1/TIMP4/TRIB1/TRIM41/UPF1/XBP1/ZC3H12A/ZFP36	52
GO:0003254	regulation of membrane depolarization	15/1842	49/17913	7.62809e-05	0.00107538	0.000740059	BCL2/CAV3/FGF12/FHL1/GJA1/GOT1/GPD1L/HCN4/MIR1-1/MLLT11/PTPN3/SCN10A/SCN2B/SCN5A/SLMAP	15
GO:0009152	purine ribonucleotide biosynthetic process	48/1842	266/17913	7.74834e-05	0.00108974	0.000749939	ACACB/ACAT1/ACSL3/ACSS2/ADCY3/ADCY4/ADCY6/ADK/ADSSL1/ALDOA/ALDOC/BPGM/DDIT4/DLD/ENO1/ENO3/FASN/GALK1/GCDH/GPI/HDAC4/IGF1/LDHA/MLYCD/MPC2/NME1/NPPA/NPPB/NUP188/NUP214/NUPR1/PANK3/PAPSS1/PDHA1/PDHB/PDK4/PFKL/PFKM/PGAM2/PID1/POM121C/PRKAG2/SCD/SNCA/STAT3/TAZ/TGFB1/TP53	48
GO:0000302	response to reactive oxygen species	43/1842	230/17913	7.79168e-05	0.00109324	0.000752347	AIFM1/AKT1/APOE/ATP7A/AXL/BCL2/BNIP3/CAMKK2/CASP3/CRYAB/CYP1B1/DUSP1/EDN1/ENDOG/FOS/FOXO1/FXN/FYN/HYAL2/IL6/IMPACT/JUN/KCNA5/KDM6B/KLF2/KLF4/MB/MIR133A1/MIR133A2/MMP2/MMP3/NOS3/NR4A3/PDGFRA/PDGFRB/PKD2/PRKCD/PXN/RELA/RGN/SIRPA/SLC8A1/TPM1	43
GO:0071480	cellular response to gamma radiation	11/1842	29/17913	7.87291e-05	0.00110202	0.000758393	CDKN1A/CRYAB/CYBA/EGR1/ELK1/HRAS/NOX4/TP53/XRCC6/YAP1/ZMPSTE24	11
GO:0016358	dendrite development	41/1842	216/17913	7.97066e-05	0.00111307	0.000765999	ABI1/APOE/APP/ARID1B/BCL11A/CAMK2A/CAMSAP2/CUL7/CUX1/CYFIP1/DBN1/DLG5/DNM1L/DTNBP1/FARP1/FMR1/FYN/GSK3B/ID1/ITGB1/KALRN/KIDINS220/MAP2/MATN2/MECP2/MEF2C/NCK2/OPA1/PDLIM5/PICALM/PLK2/PREX2/PTPRD/RAP2A/RHOA/RTN4IP1/SIPA1L1/SLC9A6/SRGAP2C/TRAK2/YWHAH	41
GO:1903531	negative regulation of secretion by cell	39/1842	202/17913	8.04675e-05	0.00112105	0.000771492	AGTR2/APOA1/APOE/BMP8A/EDN1/F2R/F2RL1/FMR1/FN1/IDH2/KALRN/LEP/LILRA5/LRRC32/MAOB/MAP4K4/MIDN/MIR20A/MIR590/NDUFAF2/PFKL/PNKD/PTPN11/RAB11FIP3/RAB11FIP5/SERPINB1/SFRP1/SLC30A1/SNCA/SRGN/SSC5D/STXBP6/SYT11/TNFRSF1A/TRIM27/VAMP3/VAMP8/VSNL1/ZC3H12A	39
GO:0034332	adherens junction organization	29/1842	134/17913	8.08632e-05	0.00112267	0.000772602	ACTN1/ACTN2/AJUBA/BCL2/CDH11/COL16A1/CTNNB1/DAPK3/DLG5/DSP/EPHA3/FAM107A/HIPK1/LDB1/MAP4K4/MAPRE2/PEAK1/PHLDB2/PLEKHA7/PPM1F/PVR/RHOA/S100A10/SFRP1/SMAD3/SORBS1/THBS1/THY1/VCL	29
GO:0043254	regulation of protein complex assembly	67/1842	409/17913	8.09626e-05	0.00112267	0.000772602	AJUBA/APOE/ARHGEF2/ARPC1B/ARPC3/CAMSAP2/CAV3/CCL11/CLIP3/CORO1A/CRYAB/CTNNB1/CYFIP1/DCTN1/DNM1L/EP300/ESR1/FCHSD2/FES/FHOD3/FKBP4/FSCN1/GSK3B/GSN/HCK/HCLS1/HEY2/HSPA8/IMPACT/IQGAP2/JUN/LCP1/LMOD2/MAP1B/MAP2/MECP2/MED25/MITF/MMP3/MSN/NAV3/NCK2/NKX2-5/NUMA1/PLEK/PLEKHG2/PRKCD/PTPN11/RAB3A/RAF1/RHOA/RNF4/SLIT2/SNCA/SPTAN1/SPTBN1/STXBP6/TGFB1/TP53/TRAF3IP1/TRAPPC12/TRIM27/ULK1/UNC13B/VDAC2/WARS/WAS	67
GO:0050708	regulation of protein secretion	73/1842	456/17913	8.45268e-05	0.00116935	0.00080473	AGTR2/AIF1/ANKRD1/ANO1/APOA1/APOE/ATP13A2/BMP8A/CACNA1C/CD14/DNM1L/F2R/F2RL1/FCN1/FGR/FN1/GJA1/GPI/GSDMD/HAVCR2/HMGN3/HYAL2/IDH2/IGF1/IL1RL1/IL6/ITPR1/ITPR3/JAK2/KARS/KCNA5/LEP/LILRA5/LRRC32/LYN/MAP4K4/MBP/MIDN/MIR20A/MIR590/MPC2/MYOM1/NADK/NDUFAF2/OXCT1/PFKL/POSTN/PPID/PTPN11/RAB11FIP3/RAB11FIP5/SERPINB1/SFRP1/SIDT2/SLC16A1/SLC25A4/SLC2A1/SOCS1/SOX4/SPTBN1/SRGN/SSC5D/SYT11/TGFB1/TGFB2/TGFB3/TRIM…	73
GO:0097009	energy homeostasis	12/1842	34/17913	8.51211e-05	0.00117483	0.000808499	ACACB/BMP8A/CRTC3/EDN2/FOXO1/IRX3/LEPR/NR4A3/OMA1/PIK3CA/SGIP1/STAT3	12
GO:1904591	positive regulation of protein import	13/1842	39/17913	8.57272e-05	0.00118044	0.000812362	BAG3/GLI3/HCLS1/HDAC3/HYAL2/IPO5/LEP/PDCD5/PRKCD/SMAD3/TGFB1/UBR5/ZC3H12A	13
GO:0060491	regulation of cell projection assembly	34/1842	168/17913	8.63175e-05	0.00118581	0.000816058	AGRN/ARAP1/ARHGAP35/ATG3/ATP7A/ATP8B1/AUTS2/CDC42EP4/CYFIP1/CYLD/DPYSL3/F2RL1/FAM98A/FMR1/FSCN1/HDAC4/HRAS/HTT/IFT140/KCTD17/KLF5/MAP4/PALM/PLEKHM1/PRKCD/RAC2/RALA/RAP1GAP/RHOQ/SLIT2/SRGAP2C/TGFB3/VDAC3/WAS	34
GO:0008286	insulin receptor signaling pathway	28/1842	128/17913	8.74323e-05	0.00119694	0.000823715	AGT/AKT1/ATP6V0E2/CSRP3/FOXO1/FOXO4/GRB10/GRB14/IGF1R/IGFBP1/INPP5K/LEP/OPA1/PDK4/PID1/PIK3CA/PRKCD/PRKCQ/PTPN1/PTPN11/PTPRA/PTPRE/RELA/RHOQ/SHC1/SOCS1/SORBS1/SOS1	28
GO:1901888	regulation of cell junction assembly	22/1842	90/17913	8.75317e-05	0.00119694	0.000823715	ACE/ACE2/AGT/COL16A1/DAPK3/EPHA3/FAM107A/GJA1/LDB1/MAP4K4/PEAK1/PHLDB2/PPM1F/PRKCH/RAPGEF1/RHOA/S100A10/SFRP1/SMAD3/THBS1/THY1/TJP1	22
GO:0060627	regulation of vesicle-mediated transport	76/1842	480/17913	8.80049e-05	0.00120064	0.00082626	ACSL3/ACTN2/ANKRD13A/ANXA2/APOA1/APOE/ARHGAP1/ATAD1/ATG3/ATP13A2/ATP2A2/AXL/BACE1/BICD1/CACNB2/CAMK2A/CAV3/CBL/CCL2/CD14/CLIP3/CORO1A/CYBA/DNM1L/DOCK2/DTNBP1/EGF/EHD2/EPHA3/F2RL1/FCER1G/FES/FGR/FMR1/GAB2/GATA2/GRASP/GSK3B/HCK/HGS/HIP1/INPP5F/ITGB2/LGALS3/LRSAM1/LYN/MAP2/MAP2K1/MAP2K2/MFGE8/MIR20A/MSN/NPPA/PICALM/PTPN1/RAB15/RAB3A/RAC2/RALA/RAPGEF1/SERPINE1/SFRP4/SGIP1/SH3GL2/SIRPA/SNCA/STAM/STXBP…	76
GO:0001570	vasculogenesis	20/1842	78/17913	8.86799e-05	0.00120302	0.000827899	CTNNB1/CUL7/FBXW7/HEG1/HEY2/JUNB/MIR1-1/MYO1E/MYOCD/NKX2-5/PDGFRB/SGPL1/SOX18/TBX5/TGFB1/TGFBR3/TIPARP/TNNI3/YAP1/ZMIZ1	20
GO:0042058	regulation of epidermal growth factor receptor signaling pathway	21/1842	84/17913	8.87891e-05	0.00120302	0.000827899	AGT/AKT1/APP/ARAP1/CBL/EGF/ERRFI1/FBXW7/HBEGF/HGS/HIP1/MIR133A1/MIR133A2/NCK2/PTPN3/RNF115/SH3GL2/SH3KBP1/SHC1/SOS1/STAM	21
GO:1901019	regulation of calcium ion transmembrane transporter activity	21/1842	84/17913	8.87891e-05	0.00120302	0.000827899	AHNAK/ATP1A2/ATP1B1/CACNA2D1/CACNB2/CALM2/CASQ1/CAV3/FMR1/HRC/HSPA2/HTT/JPH2/MIR133A1/MIR133A2/NPPA/PDE4D/PKD2/PLN/RGN/RYR2	21
GO:0090132	epithelium migration	60/1842	357/17913	9.04302e-05	0.00122246	0.000841277	ADAMTS9/AGT/AGTR2/AKT1/AMOTL1/APOA1/APOE/BMP10/CYP1B1/DOCK1/EDN1/FAP/FBXW7/FGF18/FGF7/GATA2/GPI/HBEGF/ID1/ITGB1/ITGB2/JUN/KANK2/KLF4/LOXL2/MAP2K5/MAP3K3/MAP4K4/MAPRE2/MECP2/MEF2C/MIR20A/MIR221/MIR29A/MMRN2/MYH9/NOS3/PECAM1/PIK3CA/PLK2/PPM1F/PROX1/PTPN11/PTPRR/PXN/RHOA/RTN4/SASH1/SERPINF1/SLIT2/SMOC2/SOX18/SP1/SPARC/STARD13/TGFB1/TGFB2/THBS1/VASH1/ZC3H12A	60
GO:0002696	positive regulation of leukocyte activation	53/1842	305/17913	9.47398e-05	0.0012778	0.000879361	AIF1/AKT1/APP/AXL/BCL2/BCL6/CCL2/CD209/CDKN1A/CORO1A/CTSC/CYLD/F2RL1/FCER1G/FGR/FYN/GAB2/GATA2/GLI3/HAVCR2/HLA-DPB1/IGF1/IL1RL1/IL6/ITGB2/KARS/LEP/LYN/MAP3K8/MEF2C/MLH1/NCK2/NFKBIZ/NPPA/NR4A3/PDCD1/PIK3CA/PIK3R6/PRKCQ/PTPN11/RHOA/SLC39A10/SOCS1/STAT5B/TFRC/TGFB1/THBS1/THY1/TSLP/TYROBP/VAMP8/XBP1/ZMIZ1	53
GO:0006606	protein import into nucleus	24/1842	103/17913	9.66831e-05	0.00129821	0.000893405	AGT/AGTR2/AKT1/BAG3/CDKN1A/GLI3/HCLS1/HDAC3/HYAL2/IPO5/IPO9/LEP/LMNA/MDFIC/NFKBIA/PKIG/PRICKLE1/PRKCD/SMAD3/STAT3/TGFB1/TP53/UBR5/ZC3H12A	24
GO:0032835	glomerulus development	17/1842	61/17913	9.69105e-05	0.00129821	0.000893405	AGTR2/BCL2/EGR1/GPR4/HEYL/MEF2C/MYO1E/NID1/OSR1/PDGFRA/PDGFRB/PECAM1/PLCE1/PROM1/SULF1/SULF2/WWTR1	17
GO:0034113	heterotypic cell-cell adhesion	17/1842	61/17913	9.69105e-05	0.00129821	0.000893405	APOA1/CD44/CTNNA3/CXADR/DSP/GCNT2/GLDN/ITGA5/ITGB1/ITGB2/KLF4/MAP2K5/MBP/MIR221/PARVA/SIRPA/THY1	17
GO:0003071	renal system process involved in regulation of systemic arterial blood pressure	10/1842	25/17913	9.86274e-05	0.00131525	0.000905137	AGT/AGTR1/AGTR2/CYBA/CYP11B2/F2R/F2RL1/GJA1/RHOA/SUCNR1	10
GO:1904385	cellular response to angiotensin	10/1842	25/17913	9.86274e-05	0.00131525	0.000905137	ACTN2/AGT/AGTR1/AGTR2/AGTRAP/ARID1B/CAMK2A/CYBA/PRKCD/RELA	10
GO:0007159	leukocyte cell-cell adhesion	56/1842	328/17913	9.95685e-05	0.00132383	0.000911037	AIF1/AKT1/BCL6/CASP3/CCL2/CD209/CD44/CEBPB/CERCAM/CORO1A/CYLD/DLG5/FYN/GLI3/GPNMB/HAVCR2/HLA-DPB1/IGF1/IL6/ITGA5/ITGB1/ITGB2/KLF4/LEP/LGALS3/LRRC32/LYN/MAP3K8/MIR221/MSN/NCK2/NFKBIZ/NR4A3/NRARP/PDCD1/PDE5A/PECAM1/PIK3CA/PIK3R6/PRKCQ/PTPN11/RAC2/RELA/RHOA/S100A8/S100A9/SOCS1/STAT5B/TFRC/TGFB1/THY1/TNIP1/VSIG4/XBP1/ZC3H12A/ZMIZ1	56
GO:0090287	regulation of cellular response to growth factor stimulus	49/1842	276/17913	9.97175e-05	0.00132383	0.000911037	AGT/AGTR2/CAV3/CDKN1C/CREBBP/CTNNB1/CYFIP1/DOK5/EMILIN1/EP300/FBN1/FGF18/GATA4/GLG1/GOT1/GRB10/HGS/HIPK2/HTRA1/ITGA5/LTBP4/MIR1-1/MIR20A/MMRN2/MSX1/MYOCD/NUMA1/PTPN1/RASL11B/RUNX2/SFRP1/SFRP4/SKI/SLC9A6/SLIT2/SMAD3/SMOC2/SMURF1/SMURF2/SULF1/SULF2/TGFB1/TGFB3/TGFBR3/THBS1/TP53/VWC2/ZEB1/ZNF423	49
GO:0007569	cell aging	26/1842	116/17913	0.000100826	0.00133432	0.000918259	BCL2/BCL6/CDKN1A/HRAS/KRAS/LMNA/MAP2K1/MAP3K3/MIR590/MME/NAMPT/NOX4/NUAK1/OPA1/PLA2R1/PLK2/PRELP/PRKCD/RWDD1/SERPINE1/TERF2/TP53/VASH1/YPEL3/ZMIZ1/ZMPSTE24	26
GO:0120162	positive regulation of cold-induced thermogenesis	23/1842	97/17913	0.000100959	0.00133432	0.000918259	ADRB1/BSCL2/CEBPB/CMKLR1/CXCR4/DECR1/DIO2/EHMT1/FH/G0S2/GADD45G/GATM/GJA1/GRB10/HDAC3/IGF1R/JAK2/KDM6B/LEP/LEPR/MFN2/OMA1/SCD	23
GO:0032418	lysosome localization	18/1842	67/17913	0.000102907	0.00135704	0.000933893	CBL/FAM98A/FCER1G/FES/FGR/GAB2/GATA2/LYN/MYH9/NPPA/NR4A3/PIK3CG/PLEKHM1/RAB3A/RAC2/S100A13/VAMP8/VPS33A	18
GO:1901184	regulation of ERBB signaling pathway	22/1842	91/17913	0.000104381	0.00137342	0.000945168	AGT/AKT1/APP/ARAP1/CBL/EGF/ERRFI1/FBXW7/HBEGF/HGS/HIP1/MIR133A1/MIR133A2/NCK2/PTPN3/RNF115/RTN4/SH3GL2/SH3KBP1/SHC1/SOS1/STAM	22
GO:0051017	actin filament bundle assembly	29/1842	136/17913	0.000106816	0.00140235	0.000965072	ACTN1/AIF1/APOA1/ARAP1/DPYSL3/FAM107A/FSCN1/ID1/INPP5K/ITGB5/LCP1/MIR20A/NOX4/PHACTR1/PHLDB2/PLEK/PPM1F/PXN/RHOA/S100A10/SFRP1/SMAD3/SORBS1/SWAP70/SYNPO2L/TGFB3/TPM1/WAS/ZYX	29
GO:0106106	cold-induced thermogenesis	30/1842	143/17913	0.000111896	0.00146165	0.00100589	ADRB1/BSCL2/CEBPB/CMKLR1/CXCR4/DDIT3/DECR1/DIO2/EHMT1/FH/G0S2/GADD45G/GATM/GJA1/GRB10/HDAC3/ID1/IGF1R/IL18R1/IP6K1/JAK2/KDM6B/LEP/LEPR/MFN2/NPR3/OMA1/SCD/TLE3/ZNF423	30
GO:0120161	regulation of cold-induced thermogenesis	30/1842	143/17913	0.000111896	0.00146165	0.00100589	ADRB1/BSCL2/CEBPB/CMKLR1/CXCR4/DDIT3/DECR1/DIO2/EHMT1/FH/G0S2/GADD45G/GATM/GJA1/GRB10/HDAC3/ID1/IGF1R/IL18R1/IP6K1/JAK2/KDM6B/LEP/LEPR/MFN2/NPR3/OMA1/SCD/TLE3/ZNF423	30
GO:0072524	pyridine-containing compound metabolic process	36/1842	184/17913	0.000112356	0.00146165	0.00100589	ALDOA/ALDOC/BPGM/DDIT4/DLD/ENO1/ENO3/GALK1/GPD1L/GPD2/GPI/HAAO/HDAC4/IDH2/IGF1/LDHA/MDH1/MDH2/MPC2/NADK/NADK2/NAMPT/NNMT/NUP188/NUP214/NUPR1/PDHA1/PDHB/PFKL/PFKM/PGAM2/POM121C/PRKAG2/STAT3/TKT/TP53	36
GO:0090075	relaxation of muscle	11/1842	30/17913	0.000112815	0.00146165	0.00100589	ATP1A1/ATP1A2/ATP1B1/ATP2A2/HRC/KCNJ2/PDE4D/PDE5A/PLN/RGS2/SLC8A1	11
GO:0099623	regulation of cardiac muscle cell membrane repolarization	11/1842	30/17913	0.000112815	0.00146165	0.00100589	CACNA2D1/CAV3/GJA1/KCNA5/MIR1-1/MIR133A1/MIR133A2/NPPA/RNF207/SCN5A/ZMPSTE24	11
GO:1902895	positive regulation of pri-miRNA transcription by RNA polymerase II	11/1842	30/17913	0.000112815	0.00146165	0.00100589	FOS/GATA2/JUN/KLF5/RELA/SMAD3/SMARCA4/STAT3/TGFB1/TGFB2/TP53	11
GO:0019932	second-messenger-mediated signaling	60/1842	360/17913	0.000114857	0.00148486	0.00102186	ADCY3/ADCY4/ADCY6/ADRB1/AGT/AGTR1/AGTR2/APOE/ATP1A2/ATP1B1/ATP2B4/C10orf71/CACNA1C/CALCRL/CALM2/CAMKK2/CASQ1/CMKLR1/CRTC3/CXCR4/EDN1/EDN2/EIF2AK3/FHL2/FPR1/GSK3B/HDAC4/HRC/HTT/IGF1/ITPR1/ITPR3/JPH2/LMCD1/MIR1-1/MIR133A1/MIR133A2/MT2A/MYOZ2/NPPA/NUDT4/PDE3A/PDE4D/PDE5A/PKD2/PLCE1/PLEK/PLN/PPP2CA/RAMP1/RASD1/RGN/RGS2/RYR2/SGCD/SLC8A1/THBS1/TMEM38B/TNNI3/ZMPSTE24	60
GO:0051208	sequestering of calcium ion	26/1842	117/17913	0.000117147	0.00150853	0.00103815	ATP1A2/CACNA1C/CALM2/CASQ1/CORO1A/CYBA/DDIT3/DIAPH1/F2R/HRC/HTT/ITPR1/JPH2/LYN/MIR1-1/MIR133A1/MIR133A2/PDE4D/PKD2/PLN/RYR2/SLC8A1/SNCA/TGFB1/THY1/TMEM38B	26
GO:0008053	mitochondrial fusion	9/1842	21/17913	0.000117197	0.00150853	0.00103815	BNIP3/DNM1L/MFF/MFN1/MFN2/OMA1/OPA1/PID1/PLD6	9
GO:0003230	cardiac atrium development	12/1842	35/17913	0.000117487	0.00150898	0.00103846	BMP10/GATA4/HEG1/HEY2/MYH6/NKX2-5/NOTCH2/PROX1/SOS1/SOX4/TBX5/TGFB2	12
GO:0070588	calcium ion transmembrane transport	51/1842	293/17913	0.000121814	0.00156118	0.00107438	AHNAK/ANXA2/ANXA5/ATP1A2/ATP1B1/ATP2A2/ATP2B4/CACNA1C/CACNA2D1/CACNA2D3/CACNB2/CALM2/CASQ1/CAV3/CORO1A/CYBA/DDIT3/DIAPH1/F2R/FMR1/FYN/HRC/HSPA2/HTT/ITPR1/JPH2/LYN/MICU2/MIR1-1/MIR133A1/MIR133A2/NPPA/OPA1/ORAI3/PDE4D/PIK3CG/PKD1L2/PKD2/PLN/PMPCB/RGN/RYR2/SEC61A1/SLC8A1/SNCA/SPG7/TGFB1/THY1/TMEM38B/TRPM7/VDAC1	51
GO:0061572	actin filament bundle organization	29/1842	137/17913	0.000122405	0.00156536	0.00107726	ACTN1/AIF1/APOA1/ARAP1/DPYSL3/FAM107A/FSCN1/ID1/INPP5K/ITGB5/LCP1/MIR20A/NOX4/PHACTR1/PHLDB2/PLEK/PPM1F/PXN/RHOA/S100A10/SFRP1/SMAD3/SORBS1/SWAP70/SYNPO2L/TGFB3/TPM1/WAS/ZYX	29
GO:0002521	leukocyte differentiation	76/1842	485/17913	0.000123498	0.00157593	0.00108453	ANXA2/APP/ATP7A/AXL/BCL2/BCL3/BCL6/C1QC/CEBPB/CMTM7/CTNNB1/CYLD/DOCK2/EGR1/EP300/F2RL1/FASN/FBN1/FBXW7/FCER1G/FES/FOS/GAB2/GATA2/GLI3/GON4L/HCLS1/HDAC4/IFI16/IL18R1/IL6/ITGB1/JUN/JUNB/KLF10/KLF6/LEP/LEPR/LRRC8A/LRRK1/LTBR/LYN/MAFB/MEF2C/MITF/MT1G/MYC/MYH9/NFKBIZ/NME1/NOTCH2/NRARP/PIAS3/PIK3R6/RHOA/RRAS/RUNX2/SFRP1/SH3PXD2A/SH3RF1/SOCS1/SOS1/SOX4/STAT3/STAT5B/TESC/TFRC/TGFB1/TMEM178A/TP53/TRIB1/TY…	76
GO:0071216	cellular response to biotic stimulus	39/1842	206/17913	0.000124537	0.00158577	0.0010913	AKT1/ANKRD1/AXL/CCL2/CD14/CD68/CEBPB/CTSG/DDIT3/EIF2AK3/GSK3B/HAMP/HAVCR2/HCK/HMGB2/IL6/LITAF/LY96/LYN/MEF2C/MIR20A/NFKBIA/NOS3/PDE4D/RELA/RHOA/SASH1/SERPINE1/SIRPA/SMC1A/TGFB1/TP53/TRIB1/TRIM41/UPF1/XBP1/ZC3H12A/ZFP36/ZMPSTE24	39
GO:0046620	regulation of organ growth	25/1842	111/17913	0.000125271	0.00159169	0.00109538	ACACB/AKT1/BMP10/CAV3/EDN1/FXN/GATA6/GJA1/HAMP/HEY2/IGF1/MEF2C/MEIS1/MIR1-1/MIR590/MYH6/NKX2-5/PIM1/PROX1/RGS2/RGS4/TBX5/TGFBR3/WWC1/YAP1	25
GO:0051147	regulation of muscle cell differentiation	36/1842	185/17913	0.000125949	0.00159689	0.00109895	BCL2/BMP10/BOC/CAV3/CTNNB1/DMPK/EDN1/EHD2/FOXO4/GDF15/HAMP/HDAC4/HEY2/IGF1/MAML1/MAPK12/MECP2/MEF2C/MIR1-1/MIR133A1/MIR133A2/MIR221/MIR590/MSX1/MYLK3/MYOCD/NKX2-5/PROX1/RBM24/RGS2/RGS4/SMYD1/SUPT6H/TGFB1/XBP1/ZEB1	36
GO:1990573	potassium ion import across plasma membrane	8/1842	17/17913	0.00012754	0.0016136	0.00111046	ATP1A1/ATP1A2/ATP1A3/ATP1B1/ATP1B3/HCN4/KCNJ2/KCNJ8	8
GO:0045637	regulation of myeloid cell differentiation	45/1842	250/17913	0.000135593	0.00171183	0.00117805	AGO4/C1QC/CEBPB/CREBBP/CTNNB1/EP300/FBN1/FBXW7/FES/FOS/GATA2/HCLS1/HMGB2/JUN/KLF10/KMT2A/KMT2C/LDB1/LGALS3/LYN/MAFB/MEF2C/MEIS1/MEIS2/MIR221/MITF/MYC/NFKBIA/NME1/NOTCH2/NR4A3/PIAS3/PRKCQ/PURB/SFRP1/SIN3A/STAT3/STAT5B/TESC/TGFB1/THBS1/TMEM178A/TRIB1/TYROBP/ZFP36	45
GO:0050769	positive regulation of neurogenesis	72/1842	455/17913	0.000135904	0.0017121	0.00117824	AGT/ANKRD1/APOE/APP/ARHGAP35/ARHGDIA/ARHGEF2/BCL2/BCL6/CPNE5/CREB3L2/CTNNB1/CUL7/CUX1/CXCR4/CYB5D2/CYFIP1/DBN1/DICER1/DLG5/DNM1L/DPYSL3/DVL3/EP300/EPHA3/FBXO38/FES/FMR1/FN1/FYN/GATA2/GLI3/HEYL/IL6/IMPACT/IRX3/KALRN/KCTD11/KIDINS220/LYN/MAN2A1/MAP1B/MAP2K1/MEF2C/MIR221/MME/NKX2-5/NME1/OPA1/PLXNB2/PRKCH/PROX1/PTPRD/RAPGEF1/RELA/RGS2/RHOA/S100A9/SERPINE2/SERPINF1/SKIL/SLIT2/SMURF1/SOCS2/SPEN/SRGAP2C…	72
GO:0001836	release of cytochrome c from mitochondria	16/1842	57/17913	0.000140522	0.00176278	0.00121312	AKT1/BCL2/BNIP3/CHCHD10/DNM1L/FXN/HIGD1A/IGF1/JUN/LMNA/MFF/MLLT11/OPA1/PDCD5/TIMM50/TP53	16
GO:0045576	mast cell activation	16/1842	57/17913	0.000140522	0.00176278	0.00121312	CBL/FCER1G/FES/FGR/GAB2/GATA2/LYN/NDRG1/NPPA/NR4A3/PIK3CG/RAC2/S100A12/S100A13/TSLP/VAMP8	16
GO:0055078	sodium ion homeostasis	14/1842	46/17913	0.000140965	0.0017646	0.00121437	AGT/AGTR1/AGTR2/ATP1A1/ATP1A2/ATP1A3/ATP1B1/ATP1B3/CORIN/CYP11B2/EDN1/MLLT6/NPPB/SLC8A1	14
GO:1904951	positive regulation of establishment of protein localization	70/1842	440/17913	0.000142057	0.00177452	0.0012212	ACSL3/AGTR2/AIF1/ANKRD1/ANO1/ATG13/ATP13A2/B3GAT3/BAG3/BCL2/CD14/DNM1L/F2R/F2RL1/FBXW7/FCN1/FGR/FYN/GJA1/GLI3/GPI/GSDMD/GSK3B/HAVCR2/HCLS1/HDAC3/HRAS/HYAL2/IGF1/IL1RL1/IL6/IPO5/ITGB2/JAK2/KARS/LEP/LILRA5/MBP/MFF/MPC2/MYOM1/NADK/OXCT1/PDCD5/POSTN/PPID/PRKCD/RAC2/SAE1/SMAD3/SOX4/SPTBN1/TCP1/TGFB1/TGFB2/TGFB3/TMEM30B/TP53/TP53BP2/TSLP/TTN/UBR5/UNC13B/VSNL1/XBP1/XPO4/YWHAG/YWHAH/YWHAQ/ZC3H12A	70
GO:0006637	acyl-CoA metabolic process	22/1842	93/17913	0.00014693	0.00182384	0.00125514	ACACB/ACAT1/ACOT6/ACOT8/ACSF2/ACSL3/ACSS2/DGAT1/DLD/FASN/GCDH/HSD17B4/MLYCD/MPC2/PDHA1/PDHB/PDK4/PMVK/SCD/SNCA/SUCLA2/THEM4	22
GO:0035383	thioester metabolic process	22/1842	93/17913	0.00014693	0.00182384	0.00125514	ACACB/ACAT1/ACOT6/ACOT8/ACSF2/ACSL3/ACSS2/DGAT1/DLD/FASN/GCDH/HSD17B4/MLYCD/MPC2/PDHA1/PDHB/PDK4/PMVK/SCD/SNCA/SUCLA2/THEM4	22
GO:0048010	vascular endothelial growth factor receptor signaling pathway	22/1842	93/17913	0.00014693	0.00182384	0.00125514	ABI1/AXL/CYBA/CYBB/CYFIP1/DOCK1/ELMO1/EMILIN1/FGF18/FYN/GRB10/HGS/ITGA5/MAPKAPK3/MMRN2/NCK2/PIK3CA/PTPN1/PXN/RHOA/SHB/SULF1	22
GO:1990845	adaptive thermogenesis	31/1842	152/17913	0.000149764	0.00185513	0.00127667	ADRB1/BMP8A/BSCL2/CEBPB/CMKLR1/CXCR4/DDIT3/DECR1/DIO2/EHMT1/FH/G0S2/GADD45G/GATM/GJA1/GRB10/HDAC3/ID1/IGF1R/IL18R1/IP6K1/JAK2/KDM6B/LEP/LEPR/MFN2/NPR3/OMA1/SCD/TLE3/ZNF423	31
GO:0098659	inorganic cation import across plasma membrane	13/1842	41/17913	0.000152846	0.0018815	0.00129482	ATP1A1/ATP1A2/ATP1A3/ATP1B1/ATP1B3/ATP2B4/CACNA2D1/FYN/HCN4/KCNJ2/KCNJ8/SLC30A1/SLC8A1	13
GO:0099587	inorganic ion import across plasma membrane	13/1842	41/17913	0.000152846	0.0018815	0.00129482	ATP1A1/ATP1A2/ATP1A3/ATP1B1/ATP1B3/ATP2B4/CACNA2D1/FYN/HCN4/KCNJ2/KCNJ8/SLC30A1/SLC8A1	13
GO:2000649	regulation of sodium ion transmembrane transporter activity	13/1842	41/17913	0.000152846	0.0018815	0.00129482	ATP1A2/ATP1B1/CAV3/FGF12/GPD1L/KLHL24/OSR1/PTPN3/SCN2B/SLMAP/TESC/WNK2/YWHAH	13
GO:0043200	response to amino acid	24/1842	106/17913	0.00015557	0.00190369	0.00131009	AIFM1/ATP7A/BCL11A/CASP3/CEBPB/COL16A1/COL4A1/COL5A2/CYBA/CYBB/EDN1/FYN/GSS/IPO5/LYN/MMP2/MTHFR/OPA1/PDGFRA/RELA/RHOA/SOCS1/XBP1/ZEB1	24
GO:0007045	cell-substrate adherens junction assembly	20/1842	81/17913	0.000155613	0.00190369	0.00131009	ACTN1/ACTN2/AJUBA/BCL2/COL16A1/DAPK3/EPHA3/FAM107A/LDB1/MAP4K4/PEAK1/PHLDB2/PPM1F/RHOA/S100A10/SFRP1/SMAD3/SORBS1/THBS1/THY1	20
GO:0048041	focal adhesion assembly	20/1842	81/17913	0.000155613	0.00190369	0.00131009	ACTN1/ACTN2/AJUBA/BCL2/COL16A1/DAPK3/EPHA3/FAM107A/LDB1/MAP4K4/PEAK1/PHLDB2/PPM1F/RHOA/S100A10/SFRP1/SMAD3/SORBS1/THBS1/THY1	20
GO:0048678	response to axon injury	19/1842	75/17913	0.000156799	0.0019103	0.00131464	AIF1/APOA1/BCL2/DPYSL3/INPP5F/JAK2/JUN/KLF4/LYN/MAP1B/MAP2K1/MAPK8IP3/MATN2/MIR221/RANGAP1/RGMA/SPP1/TNC/TYROBP	19
GO:1900046	regulation of hemostasis	19/1842	75/17913	0.000156799	0.0019103	0.00131464	APOE/C1QTNF1/CD9/COMP/EDN1/F2R/F2RL1/FAP/LYN/NOS3/PDGFRA/PLAU/PLEK/PRKCD/PRKCQ/PROS1/SERPINE1/SERPINE2/THBS1	19
GO:0099625	ventricular cardiac muscle cell membrane repolarization	11/1842	31/17913	0.000158708	0.00192959	0.00132791	CACNA2D1/CAV3/GJA1/KCNE4/KCNJ8/MIR1-1/MIR133A1/MIR133A2/RNF207/SCN5A/ZMPSTE24	11
GO:0006007	glucose catabolic process	12/1842	36/17913	0.000159856	0.00193559	0.00133204	ALDOA/ALDOC/BPGM/ENO1/ENO3/GPI/LRP5/PFKL/PFKM/PGAM2/TKTL1/TP53	12
GO:0006734	NADH metabolic process	12/1842	36/17913	0.000159856	0.00193559	0.00133204	ALDOA/ALDOC/BPGM/ENO1/ENO3/GPD2/GPI/MDH2/PFKL/PFKM/PGAM2/TP53	12
GO:0046822	regulation of nucleocytoplasmic transport	23/1842	100/17913	0.000164927	0.00199293	0.0013715	AGTR2/BAG3/GLI3/GSK3B/HCLS1/HDAC3/HYAL2/IPO5/LEP/MDFIC/NUP214/PKIG/PRKCD/PTPN11/PTPN14/RANGAP1/SMAD3/SUPT6H/TGFB1/TP53/UBR5/XPO4/ZC3H12A	23
GO:0050730	regulation of peptidyl-tyrosine phosphorylation	44/1842	245/17913	0.000168681	0.00203414	0.00139986	ABI1/ACE/AGT/APP/ARHGEF2/CD44/CRLF1/DOK7/EGF/ERRFI1/FBXW7/FGF7/FYN/HBEGF/HCLS1/HYAL2/IGF1/IL6/INPP5F/ITGA5/ITGB2/JAK2/LEP/LILRA5/LRRK1/LYN/MIR221/MVP/NCK2/NOX4/PECAM1/PPP2CA/PRKCD/PTPN1/SFRP1/SHC1/SOCS1/STAT3/TGFB1/THBS4/THY1/TNFRSF1A/TP53/TSLP	44
GO:0036376	sodium ion export across plasma membrane	6/1842	10/17913	0.000170793	0.00205125	0.00141164	ATP1A1/ATP1A2/ATP1A3/ATP1B1/ATP1B3/SLC8A1	6
GO:0048739	cardiac muscle fiber development	6/1842	10/17913	0.000170793	0.00205125	0.00141164	CXADR/MYH6/SGCD/TCAP/TTN/ZMPSTE24	6
GO:0007229	integrin-mediated signaling pathway	22/1842	94/17913	0.000173467	0.00207915	0.00143084	ADAM11/APOA1/COL16A1/DOCK1/FCER1G/FGR/HCK/ITGA10/ITGA5/ITGA9/ITGB1/ITGB2/ITGB5/MYH9/PLEK/PTPN11/THY1/TIMP1/TLN1/TSPAN32/TYROBP/ZYX	22
GO:0009746	response to hexose	37/1842	195/17913	0.000174906	0.00209215	0.00143979	ANO1/CASP3/COL6A2/CYBA/EGR1/EIF2B3/ENDOG/GATA4/GJA1/HMGN3/MAP4K4/MIR221/MPC2/NADK/NAMPT/NDUFAF2/NME1/NOX4/OPA1/OXCT1/PFKL/PIK3CA/RAB11FIP5/RAF1/RHOA/RMI1/SERPINF1/SIDT2/SIN3A/SLC8A1/SMARCA4/SOX4/TGFB1/THBS1/UNC13B/VSNL1/XBP1	37
GO:0010324	membrane invagination	16/1842	58/17913	0.000175735	0.00209362	0.00144079	AIF1/DOCK1/ELMO1/F2RL1/FCER1G/GATA2/GSN/HGS/ITGB2/MARCO/MFGE8/MYH9/RHOA/SMURF1/SYT11/THBS1	16
GO:0070527	platelet aggregation	16/1842	58/17913	0.000175735	0.00209362	0.00144079	ACTB/C1QTNF1/CD9/CLIC1/COMP/LYN/MYH9/PDGFRA/PIK3CG/PLEK/PRKCD/PRKCQ/SERPINE2/TLN1/TSPAN32/VCL	16
GO:0042594	response to starvation	34/1842	174/17913	0.000176203	0.00209498	0.00144173	ACAT1/ADSSL1/ATF3/BCL2/CBL/CDKN1A/DDIT3/EIF2AK3/FOXO1/GNPAT/HAMP/HIGD1A/HSPA8/IFI16/IMPACT/JUN/KLF10/LAMP2/MTMR3/OXCT1/PDK4/PPM1D/RNF152/SFRP1/SLC2A1/SLC38A2/TP53/ULK1/ULK2/WDR45B/WIPI1/XBP1/ZC3H12A/ZFP36	34
GO:0043542	endothelial cell migration	48/1842	275/17913	0.000177586	0.00210719	0.00145013	ADAMTS9/AGT/AGTR2/AKT1/AMOTL1/APOA1/APOE/BMP10/CYP1B1/EDN1/FAP/FBXW7/FGF18/GATA2/GPI/ID1/ITGB1/ITGB2/KLF4/LOXL2/MAP2K5/MAP3K3/MECP2/MEF2C/MIR20A/MIR221/MIR29A/MMRN2/MYH9/NOS3/PECAM1/PIK3CA/PLK2/PROX1/PXN/RHOA/SASH1/SERPINF1/SLIT2/SMOC2/SOX18/SP1/SPARC/STARD13/TGFB1/THBS1/VASH1/ZC3H12A	48
GO:0014902	myotube differentiation	24/1842	107/17913	0.000181303	0.00214699	0.00147752	ACTA1/BCL2/CAV3/CD9/DMPK/DYRK1B/EHD2/GDF15/HDAC4/IGF1/KLF5/MAML1/MEF2C/MIR1-1/MIR133A1/MIR133A2/MYH9/MYOCD/NKX2-5/RBM24/SKI/SMYD1/SORT1/XBP1	24
GO:0002791	regulation of peptide secretion	75/1842	483/17913	0.000182205	0.00215337	0.00148192	AGTR2/AIF1/ANKRD1/ANO1/APOA1/APOE/ATP13A2/BMP8A/CACNA1C/CD14/DNM1L/F2R/F2RL1/FCN1/FGR/FN1/GJA1/GPI/GSDMD/HAVCR2/HMGN3/HYAL2/IDH2/IGF1/IL1RL1/IL6/ITPR1/ITPR3/JAK2/KALRN/KARS/KCNA5/LEP/LILRA5/LRRC32/LYN/MAP4K4/MBP/MIDN/MIR20A/MIR590/MPC2/MYOM1/NADK/NDUFAF2/OXCT1/PFKL/POSTN/PPID/PTPN11/RAB11FIP3/RAB11FIP5/S100A8/SERPINB1/SFRP1/SIDT2/SLC16A1/SLC25A4/SLC2A1/SOCS1/SOX4/SPTBN1/SRGN/SSC5D/SYT11/TGFB1/TGF…	75
GO:2000378	negative regulation of reactive oxygen species metabolic process	17/1842	64/17913	0.000184744	0.00217903	0.00149957	AATF/ATP2B4/BCL2/BNIP3/CRYAB/FYN/GLA/MIR590/MMP3/PLIN5/RGN/RHOA/SIRPA/STAT3/TP53/VDAC1/ZC3H12A	17
GO:1903426	regulation of reactive oxygen species biosynthetic process	23/1842	101/17913	0.000193093	0.00227297	0.00156422	AGT/AGTR2/AIF1/AKT1/ATP2B4/CYBA/EDN1/FYN/GLA/HDAC4/ITGB2/JAK2/KLF2/KLF4/MIR590/PKD2/RGN/RHOA/SIRPA/SMAD3/SNCA/STAT3/ZC3H12A	23
GO:0001505	regulation of neurotransmitter levels	54/1842	321/17913	0.000193699	0.00227558	0.00156602	AGT/AGTR2/AIF1/AKT1/ALDH5A1/ATP1A2/ATP2A2/ATP2B4/ATP7A/BACE1/BRSK1/CACNB2/CAMK2A/CHDH/CLN3/CYP1B1/DNM1L/DTNBP1/EDN1/FMR1/GLA/GSK3B/HSPA8/ITGB2/JAK2/KCNC4/KLF2/KLF4/MAOB/MEF2C/NAAA/NOS3/PHGDH/PKD2/PNKD/PPFIA4/RAB3A/RGN/RGS2/RGS4/RHOT1/SDSL/SHMT2/SIRPA/SLC29A2/SLC30A1/SLC38A1/SLC44A1/SMAD3/SNCA/SNCAIP/SYT11/UNC13B/ZC3H12A	54
GO:0002694	regulation of leukocyte activation	76/1842	492/17913	0.000195342	0.00228682	0.00157375	AIF1/AKT1/APP/AXL/BCL2/BCL6/CASP3/CCL2/CD209/CDKN1A/CEBPB/CORO1A/CTNNB1/CTSC/CYLD/DLG5/F2RL1/FCER1G/FES/FGR/FYN/GAB2/GATA2/GLI3/GPNMB/GSN/HAVCR2/HLA-DPB1/IGF1/IL1RL1/IL6/ITGB2/KARS/LDLR/LEP/LGALS3/LRRC32/LYN/MAP3K8/MEF2C/MLH1/NCK2/NFKBIZ/NPPA/NR4A3/NRARP/PAG1/PDCD1/PDE5A/PIK3CA/PIK3R6/PRKCQ/PTPN11/RAC2/RHOA/SFRP1/SH3RF1/SLC39A10/SNCA/SOCS1/SOS1/STAT5B/SUPT6H/TFRC/TGFB1/THBS1/THY1/TSLP/TSPAN32/TYR…	76
GO:0072522	purine-containing compound biosynthetic process	50/1842	291/17913	0.000195428	0.00228682	0.00157375	ACACB/ACAT1/ACSL3/ACSS2/ADCY3/ADCY4/ADCY6/ADK/ADSSL1/ALDOA/ALDOC/BPGM/DDIT4/DLD/ENO1/ENO3/FASN/GALK1/GCDH/GPI/GUCA1C/HDAC4/IGF1/LDHA/MLYCD/MPC2/NME1/NOS3/NPPA/NPPB/NUP188/NUP214/NUPR1/PANK3/PAPSS1/PDHA1/PDHB/PDK4/PFKL/PFKM/PGAM2/PID1/POM121C/PRKAG2/SCD/SNCA/STAT3/TAZ/TGFB1/TP53	50
GO:0010821	regulation of mitochondrion organization	34/1842	175/17913	0.000197488	0.00230636	0.0015872	ACAA2/AKT1/ATG13/ATP13A2/BAG3/BCL2/BNIP3/CAMKK2/CHCHD10/DNM1L/FBXW7/FXN/GSK3B/HIGD1A/HTT/IGF1/LMNA/MFF/MFN2/MLLT11/OMA1/OPA1/PDCD5/PID1/PLD6/RAC2/SAE1/SMURF1/TP53/TP53BP2/VDAC1/YWHAG/YWHAH/YWHAQ	34
GO:0061326	renal tubule development	22/1842	95/17913	0.000204148	0.00237478	0.00163428	ACAT1/AGT/AGTR2/BCL2/COL4A1/CTNNB1/DCHS1/FAT4/GLI3/GZF1/HEYL/IRX2/IRX3/KLHL3/MEF2C/MYC/OSR1/PKD2/PROM1/TGFB1/WWTR1/YAP1	22
GO:0120034	positive regulation of plasma membrane bounded cell projection assembly	22/1842	95/17913	0.000204148	0.00237478	0.00163428	AGRN/ARAP1/ARHGAP35/ATP7A/AUTS2/CDC42EP4/CYFIP1/DPYSL3/F2RL1/FAM98A/FMR1/FSCN1/HDAC4/HRAS/HTT/KCTD17/PALM/PLEKHM1/RAC2/RALA/RHOQ/TGFB3	22
GO:0010107	potassium ion import	8/1842	18/17913	0.000208912	0.00242069	0.00166588	ATP1A1/ATP1A2/ATP1A3/ATP1B1/ATP1B3/HCN4/KCNJ2/KCNJ8	8
GO:0033005	positive regulation of mast cell activation	8/1842	18/17913	0.000208912	0.00242069	0.00166588	FCER1G/FGR/GAB2/GATA2/NPPA/NR4A3/TSLP/VAMP8	8
GO:0051701	interaction with host	39/1842	211/17913	0.000209685	0.00242368	0.00166793	ACE2/AXL/CBL/CD209/CTNNB1/CTSB/CXADR/CXCR4/FCN1/FCN3/GSN/HIPK2/HYAL2/IFIT1/IFITM1/IFITM2/IFITM3/ITGA5/ITGB1/ITGB5/LDLR/MIR221/NPC1/PPID/PVR/SLC22A5/SMAD3/TCP1/TFRC/TGFB1/THOC7/TNIP1/TRIM27/TRIM35/TRIM8/VAMP8/WWP2/ZC3H12A/ZNF639	39
GO:1901661	quinone metabolic process	10/1842	27/17913	0.000209989	0.00242368	0.00166793	AKR1C1/COQ2/COQ3/COQ4/COQ6/COQ7/COQ8A/COQ9/PDSS1/PDSS2	10
GO:0032411	positive regulation of transporter activity	24/1842	108/17913	0.000210735	0.00242755	0.0016706	ACTN2/ATP1B1/ATP1B3/CACNA2D1/CACNB2/CALM2/CASQ1/CCL2/CHCHD10/HSPA2/HTT/JPH2/KCNIP2/KCTD7/KMT2A/MIR1-1/NPPA/PKD2/PRKCD/RGN/RNF207/RYR2/TESC/WNK2	24
GO:0061564	axon development	69/1842	438/17913	0.000212164	0.00243016	0.0016724	APBB2/APOA1/APOE/APP/ARHGAP35/ARHGDIA/AUTS2/BCL2/BOC/BRSK1/CAMSAP2/CASP3/CDH11/CHN1/CXCR4/CYFIP1/DDR1/DOK5/DOK6/ENAH/EPHA3/EXT1/FN1/FYN/GAB2/GLI3/GRB10/GSK3B/INPP5F/ITGB1/JAK2/JUN/KIF13B/KLF4/LAMA2/MAP1B/MAP2/MAP2K1/MAPK8IP3/MATN2/MIR221/MYOT/NR4A3/PICALM/PIK3CA/PRKCQ/PTPN11/PTPRA/RAP1GAP/RGMA/RHOA/RTN4/SH3KBP1/SHC1/SIPA1L1/SKIL/SLC9A6/SLIT2/SOS1/SPP1/SPTAN1/SPTBN1/THY1/TNC/TRAK2/UCHL1/ULK2/UNC5B…	69
GO:0001667	ameboidal-type cell migration	70/1842	446/17913	0.00021422	0.00243016	0.0016724	ADAMTS9/AGT/AGTR2/AKT1/AMOTL1/APOA1/APOE/ARHGDIB/ARID5B/BMP10/CAP1/CYP1B1/DOCK1/EDN1/FAP/FBXW7/FGF18/FGF7/FN1/GATA2/GPI/HBEGF/HYAL2/ID1/ITGB1/ITGB2/JUN/KANK2/KLF4/LOXL2/MAP2K5/MAP3K3/MAP4K4/MAPRE2/MECP2/MEF2C/MIR20A/MIR221/MIR29A/MMRN2/MTA2/MYH9/NOS3/PECAM1/PIK3CA/PLK2/PPM1F/PROX1/PTPN11/PTPRR/PXN/RHOA/RTN4/SASH1/SERPINF1/SGPL1/SLC8A1/SLIT2/SMOC2/SMURF2/SOX18/SP1/SPARC/STARD13/TGFB1/TGFB2/THBS1/T…	70
GO:0034405	response to fluid shear stress	12/1842	37/17913	0.000214621	0.00243016	0.0016724	AKT1/GJA1/HDAC3/KLF2/KLF4/MAP2K5/MEF2C/NOS3/PDGFRB/PKD2/TGFB1/TGFB3	12
GO:0042181	ketone biosynthetic process	12/1842	37/17913	0.000214621	0.00243016	0.0016724	COQ2/COQ3/COQ4/COQ6/COQ7/COQ8A/COQ9/CYP11B1/CYP11B2/EGR1/PDSS1/PDSS2	12
GO:0042307	positive regulation of protein import into nucleus	12/1842	37/17913	0.000214621	0.00243016	0.0016724	BAG3/GLI3/HCLS1/HDAC3/HYAL2/IPO5/LEP/PRKCD/SMAD3/TGFB1/UBR5/ZC3H12A	12
GO:0060306	regulation of membrane repolarization	12/1842	37/17913	0.000214621	0.00243016	0.0016724	CACNA2D1/CAV3/GJA1/KCNA5/KCNJ2/MIR1-1/MIR133A1/MIR133A2/NPPA/RNF207/SCN5A/ZMPSTE24	12
GO:0071801	regulation of podosome assembly	7/1842	14/17913	0.000214655	0.00243016	0.0016724	ARHGEF2/FSCN1/GSN/HCK/LCP1/MSN/RHOA	7
GO:0086069	bundle of His cell to Purkinje myocyte communication	7/1842	14/17913	0.000214655	0.00243016	0.0016724	CACNA2D1/CTNNA3/DSP/KCNA5/SCN10A/SCN5A/TNNI3K	7
GO:1903729	regulation of plasma membrane organization	7/1842	14/17913	0.000214655	0.00243016	0.0016724	AR/GSN/MYH9/PRKCD/RAB3A/SH3GL2/TGFB2	7
GO:0009749	response to glucose	36/1842	190/17913	0.000218767	0.00247199	0.00170118	ANO1/CASP3/COL6A2/CYBA/EGR1/EIF2B3/ENDOG/GATA4/GJA1/HMGN3/MAP4K4/MIR221/MPC2/NADK/NDUFAF2/NME1/NOX4/OPA1/OXCT1/PFKL/PIK3CA/RAB11FIP5/RAF1/RHOA/RMI1/SERPINF1/SIDT2/SIN3A/SLC8A1/SMARCA4/SOX4/TGFB1/THBS1/UNC13B/VSNL1/XBP1	36
GO:0086019	cell-cell signaling involved in cardiac conduction	11/1842	32/17913	0.000219518	0.00247575	0.00170377	CACNA1C/CACNA2D1/CACNB2/CXADR/GJA1/HCN4/KCNA5/RNF207/RYR2/SCN10A/SCN5A	11
GO:0046328	regulation of JNK cascade	33/1842	169/17913	0.000220733	0.00248471	0.00170994	AKT1/APP/COPS5/CYLD/DTNBP1/DVL3/EDN1/F2RL1/FGD2/GADD45A/GADD45B/GADD45G/HDAC3/HIPK2/HRAS/IGF1R/KLHL31/LTBR/MAP3K6/MAP4K4/MAPK8IP3/MDFIC/PTPN1/RAP2A/RAPGEF1/SASH1/SFRP1/SH3RF1/SH3RF2/SH3RF3/SIRPA/TPD52L1/ZMYND11	33
GO:0051048	negative regulation of secretion	41/1842	226/17913	0.000221593	0.00248966	0.00171334	AGTR2/APOA1/APOE/BMP8A/EDN1/EGF/F2R/F2RL1/FMR1/FN1/IDH2/KALRN/LEP/LILRA5/LRRC32/MAOB/MAP4K4/MIDN/MIR20A/MIR590/NDUFAF2/PFKL/PLA2R1/PNKD/PTPN11/RAB11FIP3/RAB11FIP5/SERPINB1/SFRP1/SLC30A1/SNCA/SRGN/SSC5D/STXBP6/SYT11/TNFRSF1A/TRIM27/VAMP3/VAMP8/VSNL1/ZC3H12A	41
GO:0007173	epidermal growth factor receptor signaling pathway	25/1842	115/17913	0.000226233	0.00253698	0.00174591	AGT/AKT1/APP/ARAP1/CBL/EGF/ERRFI1/FBXW7/HBEGF/HGS/HIP1/MIR133A1/MIR133A2/NCK2/PIK3CA/PLCE1/PTPN11/PTPN3/RNF115/SH3GL2/SH3KBP1/SHC1/SOS1/STAM/TGFB1	25
GO:0034109	homotypic cell-cell adhesion	19/1842	77/17913	0.000227266	0.00254375	0.00175057	ACTB/C1QTNF1/CD9/CLIC1/COMP/CTNNA3/CXADR/DSP/LYN/MYH9/PDGFRA/PIK3CG/PLEK/PRKCD/PRKCQ/SERPINE2/TLN1/TSPAN32/VCL	19
GO:0043407	negative regulation of MAP kinase activity	18/1842	71/17913	0.000229122	0.00255968	0.00176153	APOE/CAV3/DUSP1/DUSP16/HYAL2/INPP5K/IRAK3/LYN/PPP2CA/PRKCD/PTPN1/RGS2/RGS3/RGS4/SFRP1/SMPD1/SPRED2/UCHL1	18
GO:0007006	mitochondrial membrane organization	26/1842	122/17913	0.000239525	0.00266584	0.00183459	ACAA2/AGK/APOO/BCL2/BNIP3/CAMK2A/CHCHD10/GSK3B/MFN1/MFN2/MIR29A/OMA1/OPA1/PDCD5/RHOT1/SNCA/SPG7/STAT3/TAZ/THEM4/TIMM50/TP53/TP53BP2/YWHAG/YWHAH/YWHAQ	26
GO:0034763	negative regulation of transmembrane transport	26/1842	122/17913	0.000239525	0.00266584	0.00183459	ACTN2/AKT1/ATP1A2/ATP7A/CALM2/CAV3/CTTNBP2NL/FGF12/FMR1/GRB10/INPP5K/KCNAB1/LEP/MIR1-1/MIR133A1/MIR133A2/OSR1/PID1/PKD2/PLN/RGS2/RGS4/SLC30A1/TGFB1/THBS1/YWHAQ	26
GO:0008154	actin polymerization or depolymerization	33/1842	170/17913	0.000247375	0.00274805	0.00189116	ABI1/ACTN2/AIF1/ARHGAP35/ARPC1B/ARPC3/CCL11/CORO1A/CYFIP1/DIAPH1/F2RL1/FAM107A/FCHSD2/FHOD3/GSN/HCK/HCLS1/IQGAP2/JAK2/LMOD2/NCK2/PLEK/PLEKHG2/PLEKHH2/PRKCD/RHOA/SLIT2/SPTAN1/SPTBN1/SWAP70/TRIM27/WAS/WIPF1	33
GO:0045666	positive regulation of neuron differentiation	58/1842	355/17913	0.000253838	0.00281456	0.00193694	AGT/ANKRD1/APOE/ARHGAP35/ARHGDIA/ARHGEF2/BCL2/BCL6/CPNE5/CREB3L2/CUL7/CUX1/CXCR4/CYB5D2/CYFIP1/DBN1/DLG5/DNM1L/DPYSL3/DVL3/EP300/EPHA3/FBXO38/FES/FMR1/FN1/FYN/GATA2/HEYL/IMPACT/IRX3/KALRN/KCTD11/KIDINS220/LYN/MAP1B/MAP2K1/MEF2C/MIR221/NKX2-5/NME1/OPA1/PLXNB2/PROX1/PTPRD/RAPGEF1/RGS2/RHOA/S100A9/SERPINF1/SKIL/SLIT2/SMURF1/SOCS2/SYT17/TIMP2/VWC2/ZEB1	58
GO:1901342	regulation of vasculature development	67/1842	425/17913	0.000254836	0.00282034	0.00194091	ADAMTS9/AGT/AGTR1/C6/CCL11/COL4A2/CTNNB1/CXCR4/CYBB/CYP1B1/EGR1/EMILIN1/FBXW7/FGF18/FOXO4/GATA2/GATA4/GATA6/GPNMB/GPR4/HEY2/HGS/HIPK1/HIPK2/HSPG2/ID1/IL6/ITGA5/ITGB1/ITGB2/KLF2/KLF4/LEP/MAP2K5/MAP3K3/MECP2/MIR1-1/MIR20A/MIR221/MIR29A/MIR451A/MMRN2/MYOCD/NOS3/NPPB/PIK3R6/PLK2/RECK/RHOA/RRAS/SASH1/SERPINE1/SERPINF1/SFRP1/SMOC2/SP1/SPARC/STARD13/STAT3/SULF1/TGFB2/THBS1/THBS4/VASH1/WARS/XBP1/ZC3H12A	67
GO:0022612	gland morphogenesis	25/1842	116/17913	0.000260685	0.00287084	0.00197566	AR/BCL2/BTBD7/CAPN1/CAV3/CCL11/CEBPB/DDR1/ESR1/FBXW7/FEM1B/FGF7/GLI3/IGFBP5/KDM5B/MSN/PROX1/SFRP1/SULF1/SULF2/TGFB1/TGFB2/TGFB3/TNC/XBP1	25
GO:0043303	mast cell degranulation	13/1842	43/17913	0.000260853	0.00287084	0.00197566	CBL/FCER1G/FES/FGR/GAB2/GATA2/LYN/NPPA/NR4A3/PIK3CG/RAC2/S100A13/VAMP8	13
GO:1990090	cellular response to nerve growth factor stimulus	13/1842	43/17913	0.000260853	0.00287084	0.00197566	AKT1/APP/ARPC3/CBL/CORO1A/DYNC1LI2/ID1/KIDINS220/MICALL1/RAB35/RAPGEF1/SH3GL2/SORT1	13
GO:0019216	regulation of lipid metabolic process	64/1842	402/17913	0.000263301	0.00289241	0.00199051	ACACB/ACADVL/ACSL3/AGT/AGTR1/AKT1/ALAS1/ANKRD1/APOA1/APOE/ASAH1/ATP1A1/BSCL2/CREBBP/CRTC3/EGR1/FASN/FBXW7/FGR/FHL2/G0S2/HDAC3/IGFBP7/KLF4/LACTB/LDLR/LEP/LYN/MLYCD/MTMR3/NR4A3/NRBF2/ORMDL3/PDGFRA/PDGFRB/PDK4/PIK3CG/PIK3IP1/PIK3R6/PLIN5/PMVK/PPP2R5A/PRKAG2/PRKCD/PROX1/RDH10/RGL1/RGN/SCD/SERPINA3/SIN3A/SNCA/SOCS1/SOCS2/SORBS1/SP1/STAT5B/TAZ/TGFB1/TM7SF2/TNFAIP8L3/TNFRSF1A/TXNRD1/ZMPSTE24	64
GO:0048762	mesenchymal cell differentiation	37/1842	199/17913	0.000266495	0.00292207	0.00201092	BCL2/CTNNB1/CUL7/DLG5/EDN1/EDNRA/EPHA3/FAM172A/FBXL17/FN1/FRZB/GCNT2/GSK3B/HEY2/HEYL/IL6/KLHL12/LOXL2/MEF2C/MIR221/MIR590/MSX1/OSR1/PHLDB1/PHLDB2/PPP2CA/RANBP3L/RDH10/RTN4/SFRP1/SMAD3/TBX5/TGFB1/TGFB2/TGFB3/TGFBR3/WWTR1	37
GO:2000637	positive regulation of gene silencing by miRNA	9/1842	23/17913	0.000269284	0.00294719	0.00202821	AJUBA/FMR1/MAP2K1/MAP2K2/STAT3/TGFB1/TP53/WTIP/ZFP36	9
GO:0022617	extracellular matrix disassembly	19/1842	78/17913	0.000271896	0.00297028	0.0020441	BSG/CAPN1/CD44/CTSG/CTSK/DDR1/FAP/FSCN1/HTRA1/IL6/LCP1/MMP15/MMP2/MMP3/SCUBE3/TGFB1/TIMP1/TIMP2/TLL2	19
GO:1902115	regulation of organelle assembly	35/1842	185/17913	0.000273669	0.00298415	0.00205365	ARHGAP35/ARHGEF2/ATG3/BMP10/CAV3/CYLD/EDN1/FSCN1/GSN/HCK/HTT/IFT140/KCTD17/LCP1/LRSAM1/MAP4/MEF2C/MIR1-1/MSN/MTMR3/MYLK3/NUMA1/NUPR1/PLK2/PROX1/PTPRD/RHOA/RNF4/SMC1A/SMCR8/STAM/TRAPPC12/UBQLN2/ULK1/VDAC3	35
GO:0043462	regulation of ATPase activity	18/1842	72/17913	0.000276528	0.00300978	0.00207128	ATP1B1/ATP1B3/CNN3/DNAJC19/HSPA2/MYBPC3/MYH6/MYL3/PLN/RAB3A/RGN/RYR2/TNNC1/TNNI3/TNNT2/TNNT3/TOR1AIP1/TPM1	18
GO:0051222	positive regulation of protein transport	64/1842	403/17913	0.000282326	0.00306726	0.00211084	ACSL3/AGTR2/AIF1/ANKRD1/ANO1/ATG13/ATP13A2/B3GAT3/BAG3/CD14/DNM1L/F2R/F2RL1/FBXW7/FCN1/FGR/FYN/GJA1/GLI3/GPI/GSDMD/GSK3B/HAVCR2/HCLS1/HDAC3/HRAS/HYAL2/IGF1/IL1RL1/IL6/IPO5/ITGB2/JAK2/KARS/LEP/LILRA5/MBP/MFF/MPC2/MYOM1/NADK/OXCT1/PDCD5/POSTN/PPID/PRKCD/RAC2/SAE1/SMAD3/SOX4/SPTBN1/TGFB1/TGFB2/TGFB3/TMEM30B/TP53/TSLP/TTN/UBR5/UNC13B/VSNL1/XBP1/XPO4/ZC3H12A	64
GO:0016055	Wnt signaling pathway	76/1842	498/17913	0.000285282	0.00309369	0.00212903	AGO4/AMOTL1/ANKRD6/APOE/APP/CAMK2A/CCAR2/CCND1/CTHRC1/CTNNB1/CYLD/DAAM2/DAPK3/DDIT3/DIXDC1/DVL3/EGF/EGR1/ESR1/FBXW11/FBXW4/FOXO1/FRZB/FZD2/GLI3/GNAQ/GPC6/GRB10/GSK3B/IGFBP1/IGFBP4/KLF4/KLHL12/LDB1/LRP5/LRRFIP2/LRRK1/MDFIC/MIR1-1/MITF/MYH6/NKD2/NKX2-5/NRARP/PKD2/PPP2CA/PRICKLE1/PRICKLE2/PSMA3/PSMC2/RAPGEF1/RBMS3/RECK/RHOA/RNF146/ROR1/RYR2/SFRP1/SFRP4/SKI/SMAD3/SMARCA4/SMURF1/SMURF2/SOX4/SOX7/SULF1…	76
GO:0061615	glycolytic process through fructose-6-phosphate	10/1842	28/17913	0.000296733	0.00319723	0.00220029	ALDOA/ALDOC/BPGM/ENO1/ENO3/GALK1/GPI/PFKL/PFKM/PGAM2	10
GO:0061620	glycolytic process through glucose-6-phosphate	10/1842	28/17913	0.000296733	0.00319723	0.00220029	ALDOA/ALDOC/BPGM/ENO1/ENO3/GALK1/GPI/PFKL/PFKM/PGAM2	10
GO:1901655	cellular response to ketone	21/1842	91/17913	0.000296864	0.00319723	0.00220029	ADCY3/ADCY6/AGTR2/AIFM1/AKT1/AR/DDIT4/ELK1/ERRFI1/FBXO32/FDX1/FOXO1/KLF2/KLF4/MSN/RWDD1/SERPINF1/SFRP1/SPP1/TGFB1/TNC	21
GO:0043270	positive regulation of ion transport	46/1842	266/17913	0.000297319	0.00319723	0.00220029	ACE2/ACTN2/AGT/AKT1/APOA1/APOE/ATP1B1/ATP1B3/CACNA2D1/CACNB2/CALM2/CAMK2A/CASQ1/CCL2/CEBPB/CHCHD10/EDN1/F2R/FGF12/FHL1/GPD1L/HSPA2/HTT/JPH2/KCNIP2/KCNJ2/LEP/LGALS3/LILRA5/MIR1-1/MLLT6/NKX2-5/NPPA/PDGFRB/PKD2/PLA2R1/PRKCD/RGN/RNF207/RYR2/SCN5A/SNCA/TESC/THY1/VAMP8/WNK2	46
GO:0006084	acetyl-CoA metabolic process	11/1842	33/17913	0.000298912	0.00319723	0.00220029	ACACB/ACAT1/ACSS2/DLD/FASN/MLYCD/MPC2/PDHA1/PDHB/PDK4/PMVK	11
GO:0042554	superoxide anion generation	11/1842	33/17913	0.000298912	0.00319723	0.00220029	AATF/AGT/CYBA/CYBB/EDN1/F2RL1/ITGB2/NOX4/PRKCD/TGFB1/TYROBP	11
GO:0048011	neurotrophin TRK receptor signaling pathway	11/1842	33/17913	0.000298912	0.00319723	0.00220029	AGT/AGTR2/CASP3/CYFIP1/DDIT4/DOK5/PTPN11/RAF1/SLC9A6/SORT1/SOS1	11
GO:0001704	formation of primary germ layer	25/1842	117/17913	0.00029969	0.00319723	0.00220029	COL12A1/COL4A2/COL5A2/COL7A1/COL8A1/CTNNB1/EXT2/FN1/GATA6/ITGA5/ITGB1/ITGB2/ITGB4/ITGB5/KDM6B/KLF4/LAMB1/MIR1-1/MMP15/MMP2/NR4A3/POU5F1/SMAD3/SOX7/TXNRD1	25
GO:1900180	regulation of protein localization to nucleus	25/1842	117/17913	0.00029969	0.00319723	0.00220029	AGTR2/AKT1/BAG3/DCLK2/EIF2AK3/FYN/GLI3/GSK3B/HCLS1/HDAC3/HYAL2/IPO5/LEP/LMNA/MDFIC/OTUD7B/PKIG/PRKCD/SIN3A/SMAD3/TCP1/TGFB1/TRIM8/UBR5/ZC3H12A	25
GO:0010256	endomembrane system organization	59/1842	365/17913	0.000300617	0.00320136	0.00220312	AKT1/AR/ARL1/ATL3/ATP2A2/BAG5/CAMSAP2/CASQ1/CAV3/CCDC136/CLCN3/CSRP3/CUL7/CXCR4/DCTN1/DMPK/DTNBP1/EHD2/EIF2AK3/F2R/FAT4/GOLGA2/GSN/HGS/HOOK1/HOOK3/HTT/LAPTM4B/LMNA/MAP2K1/MAP2K2/MICALL1/MYH9/NDRG1/PLEKHF1/PPP2CA/PPP2R2A/PRKCD/RAB3A/RILP/RTN3/RTN4/SEC16A/SEC61A1/SERPINE2/SH3GL2/SPTBN1/SRGN/STAM/STX2/STX6/SYT11/TBC1D20/TGFB2/TMED9/TMEM38B/TOR1AIP1/TRAPPC12/ZMPSTE24	59
GO:0051346	negative regulation of hydrolase activity	66/1842	420/17913	0.000309215	0.00328701	0.00226206	AKT1/APOA1/APP/BICD1/BIRC5/BOD1/BST2/CD2BP2/CD44/CNN3/COL6A3/COL7A1/CRIM1/CRYAB/FARP1/GSK3B/HRAS/IFI16/IFIT1/IPO5/IQGAP2/ITIH5/KLF4/LEPR/LGALS3/MAP2/MAP2K5/MASTL/MIR590/MYO1D/NOS3/PEBP1/PHACTR1/PICALM/PLA2R1/PLIN5/PLN/PPP1R14B/PPP1R1A/PPP1R1C/PPP1R26/PPP1R9B/PROS1/RAF1/RECK/RGN/RGS2/SERPINA5/SERPINB1/SERPINE1/SH3RF1/SH3RF2/SLIT2/SNCA/SORT1/SPOCK1/TERF2/TGFB2/THBS1/TIMP1/TIMP2/TNNI3/TNNT2/TP53/UCH…	66
GO:0010332	response to gamma radiation	15/1842	55/17913	0.000318439	0.00336693	0.00231706	BCL2/CBL/CDKN1A/CRYAB/CYBA/DCUN1D3/EGR1/ELK1/HRAS/MYC/NOX4/TP53/XRCC6/YAP1/ZMPSTE24	15
GO:0035306	positive regulation of dephosphorylation	15/1842	55/17913	0.000318439	0.00336693	0.00231706	AGTR2/CALM2/CDCA2/DUSP26/JAK2/MEF2C/PDGFRB/PLEK/PPP2R5A/PRKCD/RGN/SLC39A10/SMAD3/SMPD1/TGFB1	15
GO:0042306	regulation of protein import into nucleus	15/1842	55/17913	0.000318439	0.00336693	0.00231706	AGTR2/BAG3/GLI3/HCLS1/HDAC3/HYAL2/IPO5/LEP/MDFIC/PKIG/PRKCD/SMAD3/TGFB1/UBR5/ZC3H12A	15
GO:0198738	cell-cell signaling by wnt	76/1842	500/17913	0.000322742	0.00340634	0.00234419	AGO4/AMOTL1/ANKRD6/APOE/APP/CAMK2A/CCAR2/CCND1/CTHRC1/CTNNB1/CYLD/DAAM2/DAPK3/DDIT3/DIXDC1/DVL3/EGF/EGR1/ESR1/FBXW11/FBXW4/FOXO1/FRZB/FZD2/GLI3/GNAQ/GPC6/GRB10/GSK3B/IGFBP1/IGFBP4/KLF4/KLHL12/LDB1/LRP5/LRRFIP2/LRRK1/MDFIC/MIR1-1/MITF/MYH6/NKD2/NKX2-5/NRARP/PKD2/PPP2CA/PRICKLE1/PRICKLE2/PSMA3/PSMC2/RAPGEF1/RBMS3/RECK/RHOA/RNF146/ROR1/RYR2/SFRP1/SFRP4/SKI/SMAD3/SMARCA4/SMURF1/SMURF2/SOX4/SOX7/SULF1…	76
GO:0055021	regulation of cardiac muscle tissue growth	19/1842	79/17913	0.000323984	0.00341336	0.00234902	BMP10/CAV3/EDN1/GATA6/GJA1/HAMP/HEY2/IGF1/MEF2C/MEIS1/MIR1-1/MIR590/NKX2-5/PIM1/RGS2/RGS4/TBX5/TGFBR3/YAP1	19
GO:0001991	regulation of systemic arterial blood pressure by circulatory renin-angiotensin	8/1842	19/17913	0.00032842	0.00342958	0.00236019	ACE/ACE2/AGTR2/CTSG/F2R/F2RL1/MME/SUCNR1	8
GO:0010612	regulation of cardiac muscle adaptation	8/1842	19/17913	0.00032842	0.00342958	0.00236019	ATP2B4/BMP10/ERRFI1/FOXO1/LMNA/MIR20A/MLIP/SMAD3	8
GO:0032891	negative regulation of organic acid transport	8/1842	19/17913	0.00032842	0.00342958	0.00236019	AGTR2/AKT1/LEP/OSR1/PLA2R1/RGS2/RGS4/THBS1	8
GO:0098911	regulation of ventricular cardiac muscle cell action potential	8/1842	19/17913	0.00032842	0.00342958	0.00236019	CACNA1C/CTNNA3/DSP/MIR1-1/MIR133A1/MIR133A2/RNF207/RYR2	8
GO:1903242	regulation of cardiac muscle hypertrophy in response to stress	8/1842	19/17913	0.00032842	0.00342958	0.00236019	ATP2B4/BMP10/ERRFI1/FOXO1/LMNA/MIR20A/MLIP/SMAD3	8
GO:0014065	phosphatidylinositol 3-kinase signaling	28/1842	138/17913	0.00033424	0.0034781	0.00239357	AGT/AKT1/CBL/EDN1/F2R/F2RL1/FGR/FYN/HCLS1/HCST/IER3/IGF1/IGF1R/JAK2/KLF4/LEP/LYN/MIR20A/PDGFRA/PDGFRB/PIK3CA/PIK3CG/PIK3IP1/PPP2R5C/PREX2/SERPINE2/TGFB2/UNC5B	28
GO:0038127	ERBB signaling pathway	28/1842	138/17913	0.00033424	0.0034781	0.00239357	AGT/AKT1/APP/ARAP1/CBL/EGF/ERRFI1/FBXW7/HBEGF/HGS/HIP1/MIR133A1/MIR133A2/MVP/NCK2/PIK3CA/PLCE1/PTPN11/PTPN3/PTPRR/RNF115/RTN4/SH3GL2/SH3KBP1/SHC1/SOS1/STAM/TGFB1	28
GO:0051961	negative regulation of nervous system development	49/1842	290/17913	0.000337127	0.00350199	0.00241001	ADCY6/APOE/APP/ARHGDIA/ARHGEF2/BAG5/BCL11A/CTNNB1/CTSC/DAAM2/DICER1/DIXDC1/DPYSL3/EIF2AK3/EIF4ENIF1/FKBP4/GLI3/GPR173/GSK3B/HOOK3/ID1/IDH2/IL6/INPP5F/IRX3/KCTD11/LDLR/MAP2/MAP4K4/MEIS1/PLK2/PTPN9/RAP1GAP2/RGMA/RHOA/RTN4/SKI/SLIT2/SPOCK1/SPP1/SRGAP2C/STAT3/TGFB1/THY1/TP53/TRAF3IP1/TRAK2/ULK2/YWHAH	49
GO:0032271	regulation of protein polymerization	34/1842	180/17913	0.000342405	0.00351966	0.00242217	ARPC1B/ARPC3/CAMSAP2/CAV3/CCL11/CLIP3/CORO1A/CYFIP1/DCTN1/FCHSD2/FES/FHOD3/FKBP4/GSN/HCK/HCLS1/IQGAP2/LMOD2/MAP1B/MAP2/MECP2/NAV3/NCK2/NUMA1/PLEKHG2/PRKCD/RHOA/SLIT2/SNCA/SPTAN1/SPTBN1/TRIM27/VDAC2/WAS	34
GO:0015672	monovalent inorganic cation transport	73/1842	477/17913	0.000342631	0.00351966	0.00242217	ACTN2/AKT1/ATP1A1/ATP1A2/ATP1A3/ATP1B1/ATP1B3/ATP2A2/ATP2B4/ATP6V0E2/ATP7A/CAV3/CHCHD10/CLCN4/COMMD3/COX10/COX15/COX5A/COX6B1/COX8A/CYB5A/DMPK/FGF12/FHL1/GPD1L/HCN4/KCNA5/KCNAB1/KCNC4/KCNIP2/KCNJ2/KCNJ4/KCNJ8/KCNT1/KLHL24/KLHL3/MIR1-1/MIR133A1/MIR133A2/MLLT6/NDUFA4L2/NKX2-5/NNT/NOS3/NPPA/OSR1/PKD2/PTPN3/RGS4/RNF207/SCN10A/SCN2B/SCN5A/SERPINE2/SLC15A3/SLC17A5/SLC22A5/SLC25A3/SLC2A12/SLC38A1/SLC38A…	73
GO:0060992	response to fungicide	6/1842	11/17913	0.00034299	0.00351966	0.00242217	EHMT1/IMPACT/KDM5B/KDM6B/KLF2/KLF4	6
GO:0086016	AV node cell action potential	6/1842	11/17913	0.00034299	0.00351966	0.00242217	CACNA1C/CACNB2/CXADR/RYR2/SCN10A/SCN5A	6
GO:0086023	adenylate cyclase-activating adrenergic receptor signaling pathway involved in heart process	6/1842	11/17913	0.00034299	0.00351966	0.00242217	ATP2B4/MIR1-1/MIR133A1/MIR133A2/PDE4D/PLN	6
GO:0086027	AV node cell to bundle of His cell signaling	6/1842	11/17913	0.00034299	0.00351966	0.00242217	CACNA1C/CACNB2/CXADR/RYR2/SCN10A/SCN5A	6
GO:1902224	ketone body metabolic process	6/1842	11/17913	0.00034299	0.00351966	0.00242217	ACAT1/ACSS3/BDH1/OXCT1/OXCT2/TYRP1	6
GO:1901861	regulation of muscle tissue development	30/1842	152/17913	0.000344655	0.00353063	0.00242972	BCL2/BMP10/CAV3/CTNNB1/EDN1/GATA6/GJA1/HAMP/HDAC4/HEY2/IGF1/IGFBP5/JPH2/MEF2C/MEIS1/MIR1-1/MIR590/MYOCD/NKX2-5/PIM1/RBM24/RGS2/RGS4/SMAD3/SOX15/TBX5/TGFB1/TGFBR3/TLL2/YAP1	30
GO:0014874	response to stimulus involved in regulation of muscle adaptation	7/1842	15/17913	0.000366792	0.00374444	0.00257686	AGT/CASQ1/FBXO32/HDAC4/SCN5A/SGCA/TRIM63	7
GO:0072160	nephron tubule epithelial cell differentiation	7/1842	15/17913	0.000366792	0.00374444	0.00257686	CTNNB1/FAT4/MEF2C/OSR1/PROM1/WWTR1/YAP1	7
GO:1900047	negative regulation of hemostasis	14/1842	50/17913	0.000371914	0.00378129	0.00260222	APOE/C1QTNF1/CD9/COMP/EDN1/FAP/NOS3/PDGFRA/PLAU/PRKCD/PROS1/SERPINE1/SERPINE2/THBS1	14
GO:0003298	physiological muscle hypertrophy	12/1842	39/17913	0.000372956	0.00378129	0.00260222	AGT/AGTR2/CAV3/EDN1/GATA4/HAMP/IGF1/NPPA/PDLIM5/RGS2/RGS4/SORBS2	12
GO:0003301	physiological cardiac muscle hypertrophy	12/1842	39/17913	0.000372956	0.00378129	0.00260222	AGT/AGTR2/CAV3/EDN1/GATA4/HAMP/IGF1/NPPA/PDLIM5/RGS2/RGS4/SORBS2	12
GO:0061049	cell growth involved in cardiac muscle cell development	12/1842	39/17913	0.000372956	0.00378129	0.00260222	AGT/AGTR2/CAV3/EDN1/GATA4/HAMP/IGF1/NPPA/PDLIM5/RGS2/RGS4/SORBS2	12
GO:0051258	protein polymerization	41/1842	232/17913	0.000390551	0.00394616	0.00271569	AIF1/ARPC1B/ARPC3/CAMSAP2/CASQ1/CAV3/CCL11/CLIP3/CORO1A/CYFIP1/DCTN1/DIAPH1/DNM1L/FAM107A/FCHSD2/FES/FHOD3/FKBP4/GOLGA2/GSN/HCK/HCLS1/IQGAP2/JAK2/LMOD2/MAP1B/MAP2/MECP2/NAV3/NCK2/NUMA1/PLEKHG2/PRKCD/RHOA/SLIT2/SNCA/SPTAN1/SPTBN1/TRIM27/VDAC2/WAS	41
GO:0097305	response to alcohol	41/1842	232/17913	0.000390551	0.00394616	0.00271569	ACTC1/ADCY3/ADCY6/AIFM1/AKT1/CA3/CBL/CCND1/CD14/CDKN1A/CTNNB1/CYBA/CYBB/FDX1/FOS/FOSB/FYN/GLB1/GSN/HAMP/IGFBP7/KLF2/KLF4/LEP/MAOB/OXCT1/PENK/PMVK/RGS2/RGS4/RHOA/S100A8/SETD7/SFRP1/SLIT2/SPARC/STAT3/TGFB1/TGFBR3/TNC/USP46	41
GO:0060148	positive regulation of posttranscriptional gene silencing	9/1842	24/17913	0.000391757	0.00395161	0.00271943	AJUBA/FMR1/MAP2K1/MAP2K2/STAT3/TGFB1/TP53/WTIP/ZFP36	9
GO:0030193	regulation of blood coagulation	18/1842	74/17913	0.000397445	0.00400216	0.00275422	APOE/C1QTNF1/CD9/EDN1/F2R/F2RL1/FAP/LYN/NOS3/PDGFRA/PLAU/PLEK/PRKCD/PRKCQ/PROS1/SERPINE1/SERPINE2/THBS1	18
GO:0072080	nephron tubule development	21/1842	93/17913	0.000406618	0.00408758	0.002813	ACAT1/AGT/AGTR2/BCL2/CTNNB1/DCHS1/FAT4/GLI3/GZF1/HEYL/IRX2/IRX3/KLHL3/MEF2C/MYC/OSR1/PKD2/PROM1/TGFB1/WWTR1/YAP1	21
GO:0051592	response to calcium ion	26/1842	126/17913	0.000408097	0.0040955	0.00281846	ALOX5AP/BRAF/CACYBP/CALM2/CCND1/DUSP1/EDN1/ENDOG/ENTPD6/FOS/FOSB/ITPR3/JUN/JUNB/KCNIP2/MEF2C/PENK/PKD2/RYR2/SCN5A/SEC31A/SPARC/SUCNR1/THBS1/TNNT2/TTN	26
GO:0016042	lipid catabolic process	50/1842	300/17913	0.000409777	0.0041054	0.00282527	ABCD3/ACAA1/ACAA2/ACACB/ACADVL/ACOT8/ACOX2/ACOX3/AIG1/AKT1/ASAH1/BCO2/BSCL2/CEL/CPT1B/CRTC3/CYP1B1/DECR1/ECI2/EHHADH/ETFB/ETFDH/GCDH/GLA/HADHB/HSD17B4/INPP5F/LDLR/LEP/LIPG/MLYCD/NAAA/NCEH1/NEU3/PAFAH2/PCCA/PIK3CG/PLA2G15/PLA2G2A/PLA2G4C/PLCE1/PLD6/PLIN5/PRDX6/PRKCD/SCP2/SGPL1/SMPD1/SPP1/YWHAH	50
GO:0045822	negative regulation of heart contraction	10/1842	29/17913	0.000411472	0.00410847	0.00282739	AGTR2/ATP1A1/ATP1A2/ATP2A2/JAK2/PDE4D/PDE5A/PIK3CG/PLN/ZC3H12A	10
GO:0046627	negative regulation of insulin receptor signaling pathway	10/1842	29/17913	0.000411472	0.00410847	0.00282739	GRB10/GRB14/INPP5K/PID1/PRKCD/PRKCQ/PTPN1/PTPRE/RELA/SOCS1	10
GO:0006814	sodium ion transport	35/1842	189/17913	0.000415966	0.00414636	0.00285346	AKT1/ATP1A1/ATP1A2/ATP1A3/ATP1B1/ATP1B3/ATP2B4/CAV3/COMMD3/DMPK/FGF12/GPD1L/HCN4/KLHL24/KLHL3/MLLT6/NKX2-5/NOS3/OSR1/PKD2/PTPN3/SCN10A/SCN2B/SCN5A/SERPINE2/SLC22A5/SLC38A1/SLC38A2/SLC4A5/SLC8A1/SLMAP/TESC/TGFB1/WNK2/YWHAH	35
GO:0051047	positive regulation of secretion	64/1842	409/17913	0.000424997	0.00422926	0.00291051	ACSL3/AGT/AGTR2/AIF1/ANKRD1/ANO1/ATP13A2/C1QTNF1/CACNB2/CD14/CYBA/DNM1L/DTNBP1/EDN1/F2R/F2RL1/FCER1G/FCN1/FGR/GAB2/GATA2/GJA1/GPI/GSDMD/HAVCR2/HGS/HYAL2/IGF1/IL1RL1/IL6/ITGB2/JAK2/KARS/LEP/LILRA5/MBP/MPC2/MYOM1/NADK/NPPA/NPPB/OXCT1/PLA2R1/POSTN/PPID/PTPN11/RAB15/RAB3A/RETN/S100A8/SNCA/SOX4/SPP1/SPTBN1/STAM/TGFB1/TGFB2/TGFB3/TSLP/TTN/UNC13B/VAMP8/VSNL1/XBP1	64
GO:0072073	kidney epithelium development	28/1842	140/17913	0.000427268	0.00423953	0.00291757	ACAT1/AGT/AGTR2/BCL2/CRLF1/CTNNB1/DCHS1/FAT4/GLI3/GZF1/HEYL/IRX2/IRX3/KANK2/KLHL3/MEF2C/MYC/MYO1E/OSR1/PECAM1/PKD2/PROM1/SFRP1/SLIT2/SMAD3/TGFB1/WWTR1/YAP1	28
GO:0002279	mast cell activation involved in immune response	13/1842	45/17913	0.000428177	0.00423953	0.00291757	CBL/FCER1G/FES/FGR/GAB2/GATA2/LYN/NPPA/NR4A3/PIK3CG/RAC2/S100A13/VAMP8	13
GO:0002448	mast cell mediated immunity	13/1842	45/17913	0.000428177	0.00423953	0.00291757	CBL/FCER1G/FES/FGR/GAB2/GATA2/LYN/NPPA/NR4A3/PIK3CG/RAC2/S100A13/VAMP8	13
GO:1903035	negative regulation of response to wounding	20/1842	87/17913	0.000431928	0.00426952	0.00293822	APOE/C1QTNF1/CD9/CDKN1A/EDN1/FAP/GJA1/INPP5F/NOS3/PDGFRA/PHLDB2/PLAU/PRKCD/PROS1/RGMA/SERPINE1/SERPINE2/SMAD3/SPP1/THBS1	20
GO:0070997	neuron death	56/1842	347/17913	0.000439893	0.00434071	0.0029872	AIFM1/AKT1/APOE/APP/ATP13A2/AXL/BACE1/BAG5/BCL2/BNIP3/BTG2/CASP3/CBL/CCL2/CEBPB/CLN3/CORO1A/CRLF1/CTNNB1/DDIT3/DDIT4/DPYSL4/EGR1/ELK1/ENDOG/F2R/FBXW7/FOS/FYN/GPNMB/GSK3B/HDAC4/HIPK2/HRAS/ITGB2/JAK2/JUN/KRAS/MECP2/MEF2C/NAMPT/NR4A3/NUPR1/PICALM/PIK3CA/RHOA/SERPINF1/SNCA/STAT3/TGFB2/TGFB3/TP53/TP53BP2/TYROBP/UNC5B/USP53	56
GO:0010657	muscle cell apoptotic process	22/1842	100/17913	0.000440595	0.00434071	0.0029872	AGT/BAG3/BNIP3/CAMK2A/COA8/DMPK/EDN1/GATA4/HEY2/IGF1/JAK2/MFN2/MIR1-1/MIR133A1/MIR133A2/MIR20A/MIR590/MYOCD/NKX2-5/NUPR1/TP53/ZC3H12A	22
GO:0046849	bone remodeling	19/1842	81/17913	0.000454703	0.00445747	0.00306756	CTHRC1/CTNNB1/CTSK/GJA1/IL6/LEP/LEPR/LRRK1/MITF/NOTCH2/NOX4/PDK4/PLEKHM1/RAC2/SFRP1/TFRC/TGFB1/TGFB3/TNFRSF11B	19
GO:0050768	negative regulation of neurogenesis	46/1842	271/17913	0.000454706	0.00445747	0.00306756	ADCY6/APOE/APP/ARHGDIA/ARHGEF2/BAG5/BCL11A/CTNNB1/DAAM2/DICER1/DIXDC1/DPYSL3/EIF4ENIF1/FKBP4/GLI3/GPR173/GSK3B/HOOK3/ID1/IDH2/IL6/INPP5F/IRX3/KCTD11/LDLR/MAP2/MAP4K4/MEIS1/PLK2/PTPN9/RAP1GAP2/RGMA/RHOA/RTN4/SKI/SLIT2/SPOCK1/SPP1/SRGAP2C/STAT3/TGFB1/THY1/TP53/TRAK2/ULK2/YWHAH	46
GO:0070372	regulation of ERK1 and ERK2 cascade	46/1842	271/17913	0.000454706	0.00445747	0.00306756	APOE/APP/ATF3/BRAF/CD44/DUSP1/DUSP26/EMILIN1/ERRFI1/F2R/F2RL1/FBXW7/FGF18/FN1/GATA4/GCNT2/GPNMB/HAVCR2/HRAS/JUN/KARS/KLF4/LYN/MAP2K1/MARCO/MIR133A1/MIR133A2/MIR221/NOTCH2/NOX4/PDGFRA/PDGFRB/PLA2G2A/PTPN1/PTPN11/PTPRR/RAPGEF1/RRAS/SHC1/SIRPA/SPRY4/TGFB1/TNFAIP8L3/TNIP1/TRAF7/WNK2	46
GO:0090066	regulation of anatomical structure size	68/1842	442/17913	0.000464053	0.00454158	0.00312544	ACE/ACE2/ACTN2/ADCY6/AGT/AGTR1/AGTR2/AKT1/APOE/ARHGAP35/ARPC1B/ARPC3/ATP13A2/ATP1A2/ATP7A/CAV3/CCL11/CLCN3/COMP/CORO1A/CYFIP1/DOCK4/EDN1/EDN2/EDNRA/F2R/F2RL1/FCHSD2/FHOD3/FN1/GJA1/GSK3B/GSN/HCK/HCLS1/HP1BP3/IQGAP2/KCNA5/LEP/LMOD2/LRRC8A/MAP1B/MAP2/MSN/NCK2/NOS3/NPPA/NPPB/PICALM/PLEK/PLEKHG2/PLEKHH2/PRKCD/PRR16/RAP1GAP2/RGS2/RHOA/RILP/RTN4/SLC8A1/SLIT2/SPP1/SPTAN1/SPTBN1/SWAP70/TRIM27/ULK2/WAS	68
GO:0030316	osteoclast differentiation	21/1842	94/17913	0.000473688	0.00462823	0.00318507	ANXA2/CEBPB/CTNNB1/FBN1/FBXW7/FCER1G/FOS/GAB2/JUNB/KLF10/LRRK1/MAFB/MITF/NOTCH2/PIAS3/SFRP1/SH3PXD2A/TFRC/TGFB1/TMEM178A/TYROBP	21
GO:0071222	cellular response to lipopolysaccharide	33/1842	176/17913	0.000476353	0.0046466	0.00319771	AKT1/ANKRD1/AXL/CCL2/CD14/CD68/CEBPB/CTSG/HAMP/HAVCR2/HCK/HMGB2/IL6/LITAF/LY96/LYN/MEF2C/MIR20A/NFKBIA/NOS3/PDE4D/RELA/RHOA/SASH1/SERPINE1/SIRPA/TGFB1/TRIB1/TRIM41/UPF1/XBP1/ZC3H12A/ZFP36	33
GO:0048286	lung alveolus development	12/1842	40/17913	0.000483451	0.00470035	0.00323471	ATP7A/ATXN1L/CIC/EDN2/ERRFI1/GATA6/IGFBP5/MAN2A1/MYOCD/TGFB3/TMEM38B/TNS3	12
GO:1902893	regulation of pri-miRNA transcription by RNA polymerase II	12/1842	40/17913	0.000483451	0.00470035	0.00323471	FOS/GATA2/HDAC4/JUN/KLF5/RELA/SMAD3/SMARCA4/STAT3/TGFB1/TGFB2/TP53	12
GO:0071479	cellular response to ionizing radiation	17/1842	69/17913	0.000486258	0.00471989	0.00324815	CDKN1A/CRYAB/CYBA/EGR1/ELK1/GADD45A/HAMP/HRAS/IFI16/NAMPT/NOX4/SFRP1/TGFB1/TP53/XRCC6/YAP1/ZMPSTE24	17
GO:0036498	IRE1-mediated unfolded protein response	16/1842	63/17913	0.000490885	0.004757	0.00327369	ACADVL/COPS5/CTDSP2/CUL7/DCTN1/EXTL1/GOSR2/LMNA/PTPN1/SEC31A/SHC1/SRPRB/TLN1/TSPYL2/WIPI1/XBP1	16
GO:1904705	regulation of vascular smooth muscle cell proliferation	20/1842	88/17913	0.000505807	0.00488562	0.0033622	AGT/CDKN1A/CNN1/EDN1/IGF1/IGFBP5/JAK2/JUN/MEF2C/MFN2/MIR1-1/MIR133A1/MIR133A2/MIR20A/MIR221/MMP2/MYOCD/NR4A3/TGFB3/TPM1	20
GO:1990874	vascular smooth muscle cell proliferation	20/1842	88/17913	0.000505807	0.00488562	0.0033622	AGT/CDKN1A/CNN1/EDN1/IGF1/IGFBP5/JAK2/JUN/MEF2C/MFN2/MIR1-1/MIR133A1/MIR133A2/MIR20A/MIR221/MMP2/MYOCD/NR4A3/TGFB3/TPM1	20
GO:0055024	regulation of cardiac muscle tissue development	22/1842	101/17913	0.00050952	0.00491347	0.00338137	BMP10/CAV3/EDN1/GATA6/GJA1/HAMP/HEY2/IGF1/JPH2/MEF2C/MEIS1/MIR1-1/MIR590/MYOCD/NKX2-5/PIM1/RGS2/RGS4/TBX5/TGFB1/TGFBR3/YAP1	22
GO:0009895	negative regulation of catabolic process	48/1842	288/17913	0.00052883	0.00509138	0.00350381	ACACB/AKT1/ANXA2/ATP13A2/ATP2B4/AZIN1/BAG5/BCL2/BSCL2/CCAR2/CRTC3/DDIT4/FHIT/FMR1/FYN/GATA4/GOLGA2/HDAC4/HIPK2/IRAK3/KDM4A/LAPTM4B/LEP/LEPR/MAP1A/NAMPT/NPC1/NUPR1/PIK3CA/PIK3CG/PLIN5/PTPN3/RBM24/RELA/RGN/RILP/SCO1/SERPINE2/SMAD3/SMCR8/SNCA/STAT3/TAF9/TIMP1/TP53/UCHL5/USP14/ZFP36	48
GO:0060416	response to growth hormone	11/1842	35/17913	0.000531178	0.00510569	0.00351365	AKT1/CACYBP/GDF15/IGFBP5/JAK2/LYN/PTPN1/PXN/SOCS2/STAT3/STAT5B	11
GO:0097529	myeloid leukocyte migration	32/1842	170/17913	0.000536306	0.0051448	0.00354057	AIF1/CCL11/CCL2/CD9/CMKLR1/CXADR/DUSP1/EDN1/EDN2/EMILIN1/IL6/ITGA9/ITGB2/KARS/LGALS3/LYN/MMP28/PDE4D/PECAM1/PIK3CG/RAC2/S100A12/S100A8/S100A9/SERPINE1/SIRPA/SLIT2/STAT5B/SWAP70/TGFB2/THBS1/THBS4	32
GO:0001701	in utero embryonic development	55/1842	342/17913	0.000536985	0.0051448	0.00354057	AKT1/AR/ATP7A/C6/CDKN1C/CEBPB/COPS3/CTNNB1/EDN1/EDNRA/ENDOG/GATA2/GATA6/GJA1/GLI3/HEG1/HEY2/HOPX/IGF1/INPP5K/ITGB1/JUNB/KIDINS220/KLF2/KRT8/MAN2A1/MAP2K1/MFN2/MSX1/MYH6/MYH9/MYO1E/NDUFA2/NOS3/PCDH12/PDGFRA/PKD2/POU5F1/PTPRR/RDH10/RTN4/SIN3A/SKIL/SLC30A1/SLC39A1/SMAD3/SOX18/SUPT6H/TANC2/TGFB3/TP53/TPM1/UBR3/VASH1/ZMIZ1	55
GO:0006984	ER-nucleus signaling pathway	13/1842	46/17913	0.000541321	0.00515299	0.00354621	ATF3/ATF6B/ATP2A2/CCL2/DDIT3/EIF2AK3/FBXW7/GSK3B/IGFBP1/NCK2/PTPN1/TP53/XBP1	13
GO:0061614	pri-miRNA transcription by RNA polymerase II	13/1842	46/17913	0.000541321	0.00515299	0.00354621	FOS/GATA2/HDAC4/JUN/KLF4/KLF5/RELA/SMAD3/SMARCA4/STAT3/TGFB1/TGFB2/TP53	13
GO:0090199	regulation of release of cytochrome c from mitochondria	13/1842	46/17913	0.000541321	0.00515299	0.00354621	AKT1/BNIP3/CHCHD10/DNM1L/FXN/HIGD1A/IGF1/LMNA/MFF/MLLT11/OPA1/PDCD5/TP53	13
GO:1990089	response to nerve growth factor	13/1842	46/17913	0.000541321	0.00515299	0.00354621	AKT1/APP/ARPC3/CBL/CORO1A/DYNC1LI2/ID1/KIDINS220/MICALL1/RAB35/RAPGEF1/SH3GL2/SORT1	13
GO:0002792	negative regulation of peptide secretion	28/1842	142/17913	0.000542392	0.0051549	0.00354752	APOA1/APOE/BMP8A/F2R/F2RL1/FN1/IDH2/KALRN/LEP/LILRA5/LRRC32/MAP4K4/MIDN/MIR20A/MIR590/NDUFAF2/PFKL/PTPN11/RAB11FIP3/RAB11FIP5/SERPINB1/SFRP1/SRGN/SSC5D/SYT11/TRIM27/VSNL1/ZC3H12A	28
GO:0016202	regulation of striated muscle tissue development	29/1842	149/17913	0.000545107	0.0051724	0.00355956	BCL2/BMP10/CAV3/CTNNB1/EDN1/GATA6/GJA1/HAMP/HDAC4/HEY2/IGF1/JPH2/MEF2C/MEIS1/MIR1-1/MIR590/MYOCD/NKX2-5/PIM1/RBM24/RGS2/RGS4/SMAD3/SOX15/TBX5/TGFB1/TGFBR3/TLL2/YAP1	29
GO:0030278	regulation of ossification	36/1842	199/17913	0.00054845	0.00519579	0.00357566	ANKH/BCL2/CEBPB/CEBPD/CHSY1/CLIC1/COMP/CTHRC1/CTNNB1/GDF10/GJA1/GLI3/HDAC4/ID1/ID3/IFITM1/IGF1/IGFBP5/IL6/LRP5/MEF2C/MGP/OMD/OSR1/RANBP3L/RUNX2/SFRP1/SKI/SLC8A1/SMAD3/SMURF1/SRGN/TGFB1/TGFB2/TGFB3/ZMPSTE24	36
GO:0060307	regulation of ventricular cardiac muscle cell membrane repolarization	9/1842	25/17913	0.000556643	0.00526499	0.00362328	CACNA2D1/CAV3/GJA1/MIR1-1/MIR133A1/MIR133A2/RNF207/SCN5A/ZMPSTE24	9
GO:0061458	reproductive system development	66/1842	429/17913	0.000558075	0.00527012	0.00362681	ADAM19/AGO4/AKT1/AR/ARID5B/ASB1/AXL/BCL2/BSG/CASP3/CBL/CCND1/CDKN1C/CEBPB/CTNNB1/CTSB/CUL7/DNAJC19/ESR1/FEM1B/FKBP4/GATA2/GATA4/GATA6/GJA1/GLI3/HEY2/HMGB2/HSD17B4/HTRA1/JUNB/KDM5B/KRT8/LEP/MAMLD1/MAP2K1/MGST1/MME/MYOCD/NDUFS6/NOS3/NUPR1/OSR1/PCDH12/PDGFRA/PDGFRB/PKD2/PTPN11/RDH10/RETN/SERPINA5/SERPINE2/SERPINF1/SFRP1/SGPL1/SLIT2/SOX15/SPP1/STAT5B/SULF1/TBC1D20/TESC/TGFB2/TIPARP/TNC/VASH1	66
GO:0010543	regulation of platelet activation	10/1842	30/17913	0.000560801	0.00528576	0.00363757	APOE/C1QTNF1/CD9/LYN/NOS3/PDGFRA/PLEK/PRKCD/PRKCQ/SERPINE2	10
GO:0006809	nitric oxide biosynthetic process	18/1842	76/17913	0.000561658	0.00528576	0.00363757	AGT/AGTR2/AIF1/AKT1/ATP2B4/CYP1B1/EDN1/GLA/ITGB2/JAK2/KLF2/KLF4/NOS3/PKD2/RGN/SIRPA/SMAD3/ZC3H12A	18
GO:0001763	morphogenesis of a branching structure	35/1842	192/17913	0.00056241	0.00528576	0.00363757	AGT/AGTR2/AR/BCL11A/BCL2/BTBD7/CAV3/CCL11/COL4A1/CTNNB1/DCHS1/DDR1/DLG5/EDN1/EDNRA/EGF/ESR1/FAT4/FEM1B/FGF7/GLI3/GZF1/KDM5B/KRAS/MYC/PKD2/PROX1/RDH10/RTN4/SFRP1/SLIT2/SULF1/TGFB1/TNC/YAP1	35
GO:0003179	heart valve morphogenesis	14/1842	52/17913	0.00057651	0.00540114	0.00371697	ADAMTS9/DCHS1/EMILIN1/GATA4/HEY2/HEYL/MEF2C/NOS3/NOTCH2/SLIT2/SOX4/TBX5/TGFB1/TGFB2	14
GO:0048747	muscle fiber development	14/1842	52/17913	0.00057651	0.00540114	0.00371697	ACTA1/BCL2/COMP/CXADR/FLNC/HDAC4/MYH6/MYL2/SGCD/SKI/TCAP/TTN/UCHL1/ZMPSTE24	14
GO:0061138	morphogenesis of a branching epithelium	33/1842	178/17913	0.000586488	0.00548593	0.00377533	AGT/AGTR2/AR/BCL2/BTBD7/CAV3/CCL11/COL4A1/CTNNB1/DCHS1/DDR1/DLG5/EDN1/EDNRA/EGF/ESR1/FAT4/FEM1B/FGF7/GLI3/GZF1/KDM5B/KRAS/MYC/PKD2/PROX1/RDH10/SFRP1/SLIT2/SULF1/TGFB1/TNC/YAP1	33
GO:0046626	regulation of insulin receptor signaling pathway	15/1842	58/17913	0.000592437	0.00549873	0.00378413	AGT/GRB10/GRB14/INPP5K/LEP/OPA1/PID1/PRKCD/PRKCQ/PTPN1/PTPN11/PTPRE/RELA/SOCS1/SORBS1	15
GO:0071230	cellular response to amino acid stimulus	16/1842	64/17913	0.000592931	0.00549873	0.00378413	ATP7A/BCL11A/CEBPB/COL16A1/COL4A1/COL5A2/CYBA/CYBB/FYN/IPO5/MMP2/OPA1/PDGFRA/SOCS1/XBP1/ZEB1	16
GO:0055012	ventricular cardiac muscle cell differentiation	7/1842	16/17913	0.000594356	0.00549873	0.00378413	BMP10/HEY2/LMNA/MEF2C/MYOCD/NKX2-5/PROX1	7
GO:0060192	negative regulation of lipase activity	7/1842	16/17913	0.000594356	0.00549873	0.00378413	APOA1/BICD1/MIR590/PLA2R1/PLIN5/RGS2/SORT1	7
GO:0060413	atrial septum morphogenesis	7/1842	16/17913	0.000594356	0.00549873	0.00378413	GATA4/HEY2/NKX2-5/NOTCH2/SOX4/TBX5/TGFB2	7
GO:0071880	adenylate cyclase-activating adrenergic receptor signaling pathway	7/1842	16/17913	0.000594356	0.00549873	0.00378413	ADRB1/ATP2B4/MIR1-1/MIR133A1/MIR133A2/PDE4D/PLN	7
GO:0086103	G protein-coupled receptor signaling pathway involved in heart process	7/1842	16/17913	0.000594356	0.00549873	0.00378413	ATP2B4/MIR1-1/MIR133A1/MIR133A2/PDE4D/PLN/RGS2	7
GO:0072009	nephron epithelium development	23/1842	109/17913	0.000618323	0.00570473	0.0039259	ACAT1/AGT/AGTR2/BCL2/CTNNB1/DCHS1/FAT4/GLI3/GZF1/HEYL/IRX2/IRX3/KLHL3/MEF2C/MYC/MYO1E/OSR1/PECAM1/PKD2/PROM1/TGFB1/WWTR1/YAP1	23
GO:0006911	phagocytosis, engulfment	12/1842	41/17913	0.000620254	0.00570473	0.0039259	AIF1/DOCK1/ELMO1/F2RL1/FCER1G/GATA2/GSN/ITGB2/MARCO/MFGE8/MYH9/THBS1	12
GO:1903053	regulation of extracellular matrix organization	12/1842	41/17913	0.000620254	0.00570473	0.0039259	AEBP1/AGT/DDR1/EMILIN1/FAP/FSCN1/IL6/PHLDB1/PHLDB2/SMAD3/TGFB1/TNFRSF1A	12
GO:0007565	female pregnancy	35/1842	193/17913	0.000620477	0.00570473	0.0039259	AGT/AKT1/AR/ARHGDIB/BCL2/BSG/COL16A1/CORIN/CTSB/DDR1/ESR1/FKBP4/FOS/FOSB/GJA1/HAVCR2/IGFBP5/IGFBP7/ITGA5/JUNB/KRAS/LEP/MMP2/NAMPT/NPPA/RECK/RGS2/SLC2A1/SLC38A2/SMURF2/SPP1/STAT5B/TGFB1/TGFB3/TIMP1	35
GO:0001976	neurological system process involved in regulation of systemic arterial blood pressure	6/1842	12/17913	0.000626307	0.00572278	0.00393833	ACE2/AGT/AGTR2/MECP2/NAV2/TNNI3	6
GO:0070486	leukocyte aggregation	6/1842	12/17913	0.000626307	0.00572278	0.00393833	CD44/MSN/NR4A3/RAC2/S100A8/S100A9	6
GO:0070493	thrombin-activated receptor signaling pathway	6/1842	12/17913	0.000626307	0.00572278	0.00393833	F2R/F2RL1/F2RL2/IQGAP2/PLEK/SNCA	6
GO:0086067	AV node cell to bundle of His cell communication	6/1842	12/17913	0.000626307	0.00572278	0.00393833	CACNA1C/CACNB2/CXADR/RYR2/SCN10A/SCN5A	6
GO:0010660	regulation of muscle cell apoptotic process	21/1842	96/17913	0.000637166	0.00581303	0.00400044	AGT/BAG3/BNIP3/CAMK2A/COA8/EDN1/GATA4/HEY2/IGF1/JAK2/MFN2/MIR1-1/MIR133A1/MIR133A2/MIR20A/MIR590/MYOCD/NKX2-5/NUPR1/TP53/ZC3H12A	21
GO:2001234	negative regulation of apoptotic signaling pathway	39/1842	223/17913	0.00065932	0.0060059	0.00413316	ACAA2/AKT1/AR/ARHGEF2/BAG5/BCL2/CCAR2/CD44/CTNNB1/ENO1/FXN/FYN/GATA4/HIGD1A/HMGB2/HTT/IGF1/IVNS1ABP/LGALS3/LMNA/MAP2K5/MIR221/NOS3/OPA1/PTPN1/RAF1/RELA/SERPINE1/SH3RF1/STRADB/TAF9/THBS1/TMBIM1/UNC5B/VDAC2/XBP1/YAP1/ZC3HC1/ZMYND11	39
GO:0090398	cellular senescence	18/1842	77/17913	0.000663676	0.00603629	0.00415408	BCL6/CDKN1A/HRAS/KRAS/MAP2K1/MAP3K3/MIR590/NAMPT/NUAK1/OPA1/PLA2R1/PLK2/PRKCD/TERF2/TP53/VASH1/YPEL3/ZMPSTE24	18
GO:0034614	cellular response to reactive oxygen species	31/1842	165/17913	0.000671407	0.00609724	0.00419602	AIFM1/AKT1/ATP7A/AXL/BNIP3/CAMKK2/CYP1B1/ENDOG/FOS/FOXO1/FXN/IL6/IMPACT/JUN/KDM6B/KLF2/KLF4/MIR133A1/MIR133A2/MMP2/MMP3/NOS3/NR4A3/PDGFRA/PKD2/PRKCD/PXN/RELA/RGN/SIRPA/TPM1	31
GO:0001889	liver development	26/1842	130/17913	0.000673248	0.0061046	0.00420109	ACAT1/ARID5B/ATP7A/CCND1/CEBPB/FBXW7/FRZB/GATA6/GLI3/HAMP/JUN/KRAS/MAN2A1/PIK3CA/PKD2/PROX1/PTPN3/QDPR/RELA/RGN/SMAD3/SULF2/TGFB1/TGFBR3/XBP1/ZMPSTE24	26
GO:0071241	cellular response to inorganic substance	35/1842	194/17913	0.000683773	0.00618229	0.00425456	AIFM1/AKT1/ALOX5AP/APP/ATP13A2/ATP7A/BACE1/BNIP3/BRAF/CACYBP/CYBB/CYP11B1/CYP11B2/EDN1/EIF2AK3/ENDOG/FMR1/FOS/FOSB/FOXO1/GSN/JUN/JUNB/MEF2C/MMP3/MT1A/MT1E/MT1G/MT1M/MT1X/MT2A/PKD2/SCN5A/SERPINF1/SNCA	35
GO:0042542	response to hydrogen peroxide	28/1842	144/17913	0.000683905	0.00618229	0.00425456	AIFM1/AXL/BCL2/BNIP3/CASP3/CRYAB/CYP1B1/DUSP1/ENDOG/FOXO1/FXN/FYN/IL6/IMPACT/JUN/KCNA5/KDM6B/KLF2/KLF4/MB/MIR133A1/MIR133A2/NR4A3/PDGFRB/PRKCD/RELA/SIRPA/SLC8A1	28
GO:0050678	regulation of epithelial cell proliferation	58/1842	369/17913	0.000689758	0.0062257	0.00428442	AGTR1/AKT1/APOE/AR/ATP7A/CCL11/CCL2/CCND1/CDKN1C/CTNNB1/CYBA/DEAF1/ERRFI1/FBXW7/FGF7/GATA2/GJA1/HMGB2/HRAS/HTRA1/ID1/IGF1/JUN/KDM5B/LAMB1/LEP/MAP2K5/MEF2C/MIR29A/MYC/NME1/NOTCH2/NR4A3/NRAS/NUPR1/OSR1/PROX1/RGN/RTN4/SCN5A/SERPINF1/SFRP1/SGPP2/SMAD3/SP1/SPARC/STAT3/SULF1/SULF2/TGFB1/TGFB2/TGFBR3/THBS1/THBS4/VASH1/XBP1/YAP1/ZFP36	58
GO:0042310	vasoconstriction	17/1842	71/17913	0.000692588	0.00624172	0.00429545	ACE/ACE2/AGT/AGTR1/AKT1/ATP1A2/COMP/DOCK4/EDN1/EDN2/EDNRA/F2R/GJA1/KCNA5/LEP/RHOA/SLC8A1	17
GO:0098801	regulation of renal system process	11/1842	36/17913	0.000694559	0.00624998	0.00430113	AGT/AGTR1/AGTR2/CORIN/CYBA/EDN1/F2R/F2RL1/GJA1/INPP5K/NPPB	11
GO:0019229	regulation of vasoconstriction	14/1842	53/17913	0.000710319	0.00635317	0.00437215	ACE/ACE2/AGT/AGTR1/AKT1/ATP1A2/DOCK4/EDN1/EDN2/F2R/GJA1/KCNA5/LEP/RHOA	14
GO:0035384	thioester biosynthetic process	14/1842	53/17913	0.000710319	0.00635317	0.00437215	ACACB/ACAT1/ACSL3/ACSS2/DLD/FASN/GCDH/MLYCD/MPC2/PDHA1/PDHB/PDK4/SCD/SNCA	14
GO:0060421	positive regulation of heart growth	14/1842	53/17913	0.000710319	0.00635317	0.00437215	ACACB/BMP10/EDN1/GATA6/HAMP/HEY2/IGF1/MEF2C/MIR590/PIM1/PROX1/TBX5/TGFBR3/YAP1	14
GO:0071616	acyl-CoA biosynthetic process	14/1842	53/17913	0.000710319	0.00635317	0.00437215	ACACB/ACAT1/ACSL3/ACSS2/DLD/FASN/GCDH/MLYCD/MPC2/PDHA1/PDHB/PDK4/SCD/SNCA	14
GO:0045428	regulation of nitric oxide biosynthetic process	16/1842	65/17913	0.000712581	0.00635421	0.00437286	AGT/AGTR2/AIF1/AKT1/ATP2B4/EDN1/GLA/ITGB2/JAK2/KLF2/KLF4/PKD2/RGN/SIRPA/SMAD3/ZC3H12A	16
GO:0098739	import across plasma membrane	16/1842	65/17913	0.000712581	0.00635421	0.00437286	AGT/ATP1A1/ATP1A2/ATP1A3/ATP1B1/ATP1B3/ATP2B4/CACNA2D1/FYN/HCN4/KCNJ2/KCNJ8/RGS2/RGS4/SLC30A1/SLC8A1	16
GO:0010662	regulation of striated muscle cell apoptotic process	15/1842	59/17913	0.000719959	0.00638932	0.00439703	AGT/BAG3/BNIP3/CAMK2A/GATA4/HEY2/JAK2/MIR133A1/MIR133A2/MIR20A/MIR590/MYOCD/NKX2-5/NUPR1/TP53	15
GO:0010830	regulation of myotube differentiation	15/1842	59/17913	0.000719959	0.00638932	0.00439703	BCL2/CAV3/DMPK/EHD2/GDF15/HDAC4/MAML1/MIR1-1/MIR133A1/MIR133A2/MYOCD/NKX2-5/RBM24/SMYD1/XBP1	15
GO:0034394	protein localization to cell surface	15/1842	59/17913	0.000719959	0.00638932	0.00439703	ACTN2/AKT1/CAV3/CTNNB1/EGF/FCER1G/FCN1/FGF7/GPD1L/MAP1A/PICALM/RAB11FIP5/SMURF1/TYROBP/VCL	15
GO:0046434	organophosphate catabolic process	39/1842	224/17913	0.000720836	0.00638932	0.00439703	ACAT1/ALDOA/ALDOC/BPGM/DDIT4/ENO1/ENO3/GALK1/GPD1L/GPI/HDAC4/IGF1/INPP5F/INPP5K/LDHA/LDLR/LIPG/MLYCD/NT5C2/NTHL1/NUDT9/NUP188/NUP214/NUPR1/PDE4D/PDE5A/PDE7A/PFKL/PFKM/PGAM2/PLA2G15/PLA2G4C/POM121C/PRDX6/PRKAG2/PRKCD/SMPD1/STAT3/TP53	39
GO:0002761	regulation of myeloid leukocyte differentiation	24/1842	117/17913	0.000730989	0.00642589	0.00442219	C1QC/CEBPB/CTNNB1/FBN1/FBXW7/FES/FOS/GATA2/HCLS1/JUN/KLF10/LYN/MAFB/MITF/MYC/NME1/NOTCH2/PIAS3/SFRP1/TESC/TGFB1/TMEM178A/TRIB1/TYROBP	24
GO:0014066	regulation of phosphatidylinositol 3-kinase signaling	24/1842	117/17913	0.000730989	0.00642589	0.00442219	AGT/CBL/F2R/F2RL1/FGR/FYN/HCLS1/HCST/IER3/IGF1/JAK2/KLF4/LEP/LYN/MIR20A/PDGFRA/PDGFRB/PIK3CA/PIK3CG/PIK3IP1/PPP2R5C/SERPINE2/TGFB2/UNC5B	24
GO:0006085	acetyl-CoA biosynthetic process	8/1842	21/17913	0.000732739	0.00642589	0.00442219	ACAT1/ACSS2/DLD/MLYCD/MPC2/PDHA1/PDHB/PDK4	8
GO:0032928	regulation of superoxide anion generation	8/1842	21/17913	0.000732739	0.00642589	0.00442219	AATF/AGT/CYBA/F2RL1/ITGB2/PRKCD/TGFB1/TYROBP	8
GO:0051589	negative regulation of neurotransmitter transport	8/1842	21/17913	0.000732739	0.00642589	0.00442219	FMR1/MAOB/PNKD/RGS2/RGS4/SLC30A1/SNCA/SYT11	8
GO:0060396	growth hormone receptor signaling pathway	8/1842	21/17913	0.000732739	0.00642589	0.00442219	GDF15/JAK2/LYN/PTPN1/PXN/SOCS2/STAT3/STAT5B	8
GO:1903055	positive regulation of extracellular matrix organization	8/1842	21/17913	0.000732739	0.00642589	0.00442219	AGT/EMILIN1/FSCN1/IL6/PHLDB1/PHLDB2/SMAD3/TGFB1	8
GO:0071621	granulocyte chemotaxis	19/1842	84/17913	0.000735613	0.00642589	0.00442219	CCL11/CMKLR1/CXADR/EDN1/EDN2/ITGA9/ITGB2/KARS/LGALS3/PDE4D/PIK3CG/RAC2/S100A12/S100A8/S100A9/SLIT2/TGFB2/THBS1/THBS4	19
GO:2001057	reactive nitrogen species metabolic process	19/1842	84/17913	0.000735613	0.00642589	0.00442219	AGT/AGTR2/AIF1/AKT1/ATP2B4/CYP1B1/EDN1/GLA/ITGB2/JAK2/KLF2/KLF4/NOS3/PKD2/RGN/SIRPA/SMAD3/SUOX/ZC3H12A	19
GO:0034766	negative regulation of ion transmembrane transport	21/1842	97/17913	0.000735814	0.00642589	0.00442219	ACTN2/AKT1/ATP1A2/ATP7A/CALM2/CAV3/FGF12/FMR1/KCNAB1/MIR1-1/MIR133A1/MIR133A2/OSR1/PKD2/PLN/RGS2/RGS4/SLC30A1/TGFB1/THBS1/YWHAQ	21
GO:0006650	glycerophospholipid metabolic process	49/1842	300/17913	0.000740411	0.00645651	0.00444327	ACSL3/AGK/AGPAT2/AJUBA/ALDH5A1/APOA1/ARF3/CHPT1/DGKH/ETNPPL/GNPAT/GPD1L/HADHB/INPP1/INPP4B/INPP5F/INPP5K/IP6K1/LCLAT1/LDLR/LPCAT3/LPCAT4/MECP2/MTMR12/MTMR3/PDGFRB/PGAP1/PGS1/PI4K2A/PIGG/PIK3CA/PIK3CG/PIK3R6/PLA2G15/PLA2G2A/PLA2G4C/PLD6/PLEK/PLEKHA4/PRDX6/PTDSS1/PTDSS2/SERINC3/SLC44A1/SLC44A2/STARD7/SYNJ2/TAMM41/TAZ	49
GO:0010765	positive regulation of sodium ion transport	10/1842	31/17913	0.000752273	0.0065311	0.0044946	AKT1/ATP1B1/ATP1B3/FGF12/GPD1L/MLLT6/NKX2-5/SCN5A/TESC/WNK2	10
GO:0051385	response to mineralocorticoid	10/1842	31/17913	0.000752273	0.0065311	0.0044946	AIFM1/CCND1/CDKN1A/CYBA/CYBB/EDN1/FOS/FOSB/KRAS/MAOB	10
GO:1900077	negative regulation of cellular response to insulin stimulus	10/1842	31/17913	0.000752273	0.0065311	0.0044946	GRB10/GRB14/INPP5K/PID1/PRKCD/PRKCQ/PTPN1/PTPRE/RELA/SOCS1	10
GO:0048608	reproductive structure development	65/1842	426/17913	0.000763019	0.00661469	0.00455213	ADAM19/AGO4/AKT1/AR/ARID5B/ASB1/AXL/BCL2/BSG/CASP3/CBL/CCND1/CDKN1C/CEBPB/CTNNB1/CTSB/CUL7/DNAJC19/ESR1/FEM1B/FKBP4/GATA2/GATA4/GATA6/GJA1/GLI3/HEY2/HMGB2/HSD17B4/HTRA1/JUNB/KDM5B/KRT8/LEP/MAMLD1/MAP2K1/MGST1/MME/MYOCD/NOS3/NUPR1/OSR1/PCDH12/PDGFRA/PDGFRB/PKD2/PTPN11/RDH10/RETN/SERPINA5/SERPINE2/SERPINF1/SFRP1/SGPL1/SLIT2/SOX15/SPP1/STAT5B/SULF1/TBC1D20/TESC/TGFB2/TIPARP/TNC/VASH1	65
GO:0007263	nitric oxide mediated signal transduction	9/1842	26/17913	0.000774274	0.00668291	0.00459907	AGT/AGTR2/APOE/ATP2B4/FPR1/MT2A/PDE5A/RASD1/THBS1	9
GO:0140115	export across plasma membrane	9/1842	26/17913	0.000774274	0.00668291	0.00459907	ATP1A1/ATP1A2/ATP1A3/ATP1B1/ATP1B3/KCNA5/KCNIP2/NPPA/SLC8A1	9
GO:1903792	negative regulation of anion transport	9/1842	26/17913	0.000774274	0.00668291	0.00459907	AGTR2/AKT1/LEP/OSR1/PLA2R1/RGS2/RGS4/SFRP4/THBS1	9
GO:0044706	multi-multicellular organism process	39/1842	225/17913	0.000787368	0.00678603	0.00467004	AGT/AKT1/AR/ARHGDIB/BCL2/BSG/COL16A1/CORIN/CTSB/DDR1/EDN1/ESR1/FKBP4/FOS/FOSB/GJA1/HAVCR2/IGFBP5/IGFBP7/ITGA5/JUNB/KALRN/KRAS/LEP/MMP2/NAMPT/NPPA/PLA2G4C/RECK/RGS2/SERPINE2/SLC2A1/SLC38A2/SMURF2/SPP1/STAT5B/TGFB1/TGFB3/TIMP1	39
GO:0001656	metanephros development	20/1842	91/17913	0.000796843	0.00685772	0.00471937	ACAT1/AGTR2/BCL2/CTNNB1/DLG5/EGR1/FAT4/FBN1/GLI3/ID3/IRX2/IRX3/MYC/OSR1/PDGFRA/PDGFRB/PKD2/RDH10/WWTR1/YAP1	20
GO:0071248	cellular response to metal ion	31/1842	167/17913	0.000827632	0.00711235	0.00489461	AKT1/ALOX5AP/APP/ATP13A2/ATP7A/BACE1/BNIP3/BRAF/CACYBP/CYBB/CYP11B1/CYP11B2/EDN1/EIF2AK3/ENDOG/FOS/FOSB/GSN/JUN/JUNB/MEF2C/MT1A/MT1E/MT1G/MT1M/MT1X/MT2A/PKD2/SCN5A/SERPINF1/SNCA	31
GO:0048667	cell morphogenesis involved in neuron differentiation	74/1842	500/17913	0.000835838	0.00717246	0.00493597	ABI1/APBB2/APOE/APP/ARHGAP35/ARHGDIA/AUTS2/BCL2/BOC/BRSK1/CAMK2A/CDH11/CHN1/CUL7/CUX1/CXCR4/CYFIP1/DBN1/DNM1L/DOK5/DOK6/DTNBP1/ENAH/EXT1/FARP1/FN1/FYN/GAB2/GLI3/GRB10/GSK3B/ID1/ITGB1/KALRN/KIDINS220/KIF13B/LAMA2/MAP1B/MAP2/MAP2K1/MATN2/MEF2C/MYOT/NR4A3/OPA1/PDLIM5/PICALM/PIK3CA/PREX2/PRKCQ/PTPN11/PTPRA/PTPRD/RAP1GAP/RAP2A/RHOA/RTN4/SH3KBP1/SHC1/SIPA1L1/SKIL/SLC9A6/SLIT2/SOS1/SPP1/SPTAN1/SPTBN1/TH…	74
GO:0002762	negative regulation of myeloid leukocyte differentiation	13/1842	48/17913	0.000844356	0.00721419	0.00496469	C1QC/CTNNB1/FBN1/FBXW7/GATA2/LYN/MAFB/MYC/NME1/PIAS3/SFRP1/TMEM178A/TRIB1	13
GO:0031103	axon regeneration	13/1842	48/17913	0.000844356	0.00721419	0.00496469	APOA1/BCL2/INPP5F/JAK2/JUN/KLF4/MAP1B/MAP2K1/MAPK8IP3/MIR221/RGMA/SPP1/TNC	13
GO:1903307	positive regulation of regulated secretory pathway	13/1842	48/17913	0.000844356	0.00721419	0.00496469	CACNB2/DNM1L/F2RL1/FCER1G/FGR/GAB2/GATA2/ITGB2/NPPA/RAB15/RAB3A/UNC13B/VAMP8	13
GO:0051170	import into nucleus	25/1842	125/17913	0.000845683	0.00721512	0.00496533	AGT/AGTR2/AKT1/BAG3/CDKN1A/GLI3/HCLS1/HDAC3/HYAL2/IPO5/IPO9/LEP/LMNA/MDFIC/NFKBIA/PKIG/PRICKLE1/PRKCD/SMAD3/SNRPB/STAT3/TGFB1/TP53/UBR5/ZC3H12A	25
GO:0043244	regulation of protein complex disassembly	21/1842	98/17913	0.000847382	0.00721921	0.00496814	ACTN2/ARHGEF2/BNIP3/CALCOCO2/F2RL1/FYCO1/GSN/IGF1R/IRAK3/LMOD2/MAP1B/MTRF1/NAV3/PLEK/PLEKHH2/SMCR8/SPTAN1/SPTBN1/SWAP70/UPF1/ZMPSTE24	21
GO:0048634	regulation of muscle organ development	29/1842	153/17913	0.000850631	0.00723647	0.00498003	BCL2/BMP10/CAV3/CTNNB1/EDN1/GATA6/GJA1/HAMP/HDAC4/HEY2/IGF1/JPH2/MEF2C/MEIS1/MIR1-1/MIR590/MYOCD/NKX2-5/PIM1/RBM24/RGS2/RGS4/SMAD3/SOX15/TBX5/TGFB1/TGFBR3/TLL2/YAP1	29
GO:0051224	negative regulation of protein transport	34/1842	189/17913	0.000852487	0.00724186	0.00498373	APOA1/APOE/BAG3/BMP8A/F2R/F2RL1/FN1/IDH2/INPP5K/LILRA5/LRRC32/MAP4K4/MDFIC/MIDN/MIR20A/MIR590/NDFIP2/NDUFAF2/PFKL/PKIG/PPM1F/PTPN11/RAB11FIP3/RAB11FIP5/RANGAP1/SERPINB1/SFRP1/SRGN/SSC5D/SYT11/TRIM27/VSNL1/WWP2/ZC3H12A	34
GO:0045785	positive regulation of cell adhesion	60/1842	388/17913	0.000853915	0.0072436	0.00498493	ADAM19/AIF1/AKT1/APOA1/BCL6/CCL2/CD209/CD44/COL16A1/COL8A1/CORO1A/CYLD/CYTH3/DOCK1/DUSP26/FN1/FRMD5/FYN/GCNT2/GLI3/GSK3B/HAVCR2/HLA-DPB1/IGF1/IL6/ITGA5/ITGB2/JAK2/LDB1/LEP/LYN/MAP3K8/MAP4K4/NCK2/NFKBIZ/NID1/NR4A3/PDCD1/PIK3CA/PIK3R6/PPM1F/PRKCQ/PTPN11/RELA/RHOA/S100A10/SFRP1/SMAD3/SMOC2/SOCS1/STAT5B/TFRC/TGFB1/TGFB2/THY1/TPM1/VWC2/XBP1/ZFHX3/ZMIZ1	60
GO:0045862	positive regulation of proteolysis	53/1842	333/17913	0.00085703	0.0072439	0.00498513	AIFM1/AKT1/APOE/APP/C6/CAV3/CTSC/CYCS/EGF/EIF2AK3/ENO1/F2R/FBXW11/FBXW7/FMR1/FN1/FYN/GSK3B/GSN/HIP1/IFI16/JAK2/KARS/LYN/MAPK12/MBP/MYC/MYH9/NKD2/NUPR1/PDCD5/PICALM/PLK2/PPM1F/PRICKLE1/PSMC2/RGN/RHBDD1/RHOA/S100A8/S100A9/SH3D19/SH3RF2/SMAD3/SMURF1/SNCA/SOX7/STAT3/TNIP1/TRIB1/UBQLN2/ZC3H12A/ZFAND2A	53
GO:0045844	positive regulation of striated muscle tissue development	19/1842	85/17913	0.000857621	0.0072439	0.00498513	BCL2/BMP10/CTNNB1/EDN1/GATA6/GJA1/HAMP/HEY2/IGF1/MEF2C/MIR1-1/MIR590/MYOCD/PIM1/RBM24/TBX5/TGFB1/TGFBR3/YAP1	19
GO:0048636	positive regulation of muscle organ development	19/1842	85/17913	0.000857621	0.0072439	0.00498513	BCL2/BMP10/CTNNB1/EDN1/GATA6/GJA1/HAMP/HEY2/IGF1/MEF2C/MIR1-1/MIR590/MYOCD/PIM1/RBM24/TBX5/TGFB1/TGFBR3/YAP1	19
GO:0051896	regulation of protein kinase B signaling	41/1842	241/17913	0.000860172	0.0072551	0.00499284	AKT1/C1QTNF1/CAV3/DDIT3/EGF/ESR1/FGF18/FGF7/FYN/GATA4/GCNT2/GDF15/HBEGF/HCLS1/HIP1/HYAL2/IGFBP5/INPP5F/INPP5K/ITGB1/KLF4/LEP/MIR20A/MIR221/MIR29A/MIR451A/NOX4/PDGFRA/PDGFRB/PIK3CA/PIK3CG/PPP2R5C/PTPN11/RAC2/RAPGEF1/RRAS/RTN4/TGFB1/THBS1/THEM4/TNFAIP8L3	41
GO:0030593	neutrophil chemotaxis	15/1842	60/17913	0.000870045	0.00731752	0.0050358	CXADR/EDN1/EDN2/ITGA9/ITGB2/LGALS3/PDE4D/PIK3CG/RAC2/S100A12/S100A8/S100A9/SLIT2/TGFB2/THBS4	15
GO:0046824	positive regulation of nucleocytoplasmic transport	15/1842	60/17913	0.000870045	0.00731752	0.0050358	BAG3/GLI3/GSK3B/HCLS1/HDAC3/HYAL2/IPO5/LEP/PRKCD/SMAD3/TGFB1/TP53/UBR5/XPO4/ZC3H12A	15
GO:0051341	regulation of oxidoreductase activity	22/1842	105/17913	0.000887644	0.00745495	0.00513037	AGT/AGTR1/AGTR2/AKT1/APOE/ATP2B4/ATP7A/CAV3/CHCHD10/CYBA/EDN1/EDN2/FXN/GLA/KRAS/LEP/NOS3/NPR3/RFK/RGN/SNCA/TERF2	22
GO:1901021	positive regulation of calcium ion transmembrane transporter activity	11/1842	37/17913	0.00089761	0.00752797	0.00518063	ATP1B1/CACNA2D1/CACNB2/CALM2/CASQ1/HSPA2/HTT/JPH2/PKD2/RGN/RYR2	11
GO:1903532	positive regulation of secretion by cell	59/1842	381/17913	0.000906601	0.00759262	0.00522512	AGT/AGTR2/AIF1/ANKRD1/ANO1/ATP13A2/C1QTNF1/CACNB2/CD14/DNM1L/DTNBP1/EDN1/F2R/F2RL1/FCER1G/FCN1/FGR/GAB2/GATA2/GJA1/GPI/GSDMD/HAVCR2/HGS/HYAL2/IGF1/IL1RL1/IL6/ITGB2/JAK2/KARS/LEP/LILRA5/MBP/MPC2/MYOM1/NADK/NPPA/OXCT1/POSTN/PPID/PTPN11/RAB15/RAB3A/RETN/SNCA/SOX4/SPP1/SPTBN1/STAM/TGFB1/TGFB2/TGFB3/TSLP/TTN/UNC13B/VAMP8/VSNL1/XBP1	59
GO:0031647	regulation of protein stability	45/1842	272/17913	0.00090828	0.00759594	0.0052274	APOA1/ATP1B1/ATP1B3/BAG3/BAG5/BCL2/CASP3/CCAR2/CDKN1A/CREBBP/CRYAB/DVL3/EP300/FAM107A/FBXW11/FBXW7/GNAQ/GSN/HDAC3/HIP1/HSPA8/HTT/ID1/IGF1/KRAS/LAMP2/LMNA/MSX1/NAA15/PIM1/PRKCD/PRKRA/RTN4/SEC16A/SMAD3/SNCA/SOX4/TADA3/TAF9/TCP1/TESC/TP53/TRIM44/TYROBP/XBP1	45
GO:0050818	regulation of coagulation	18/1842	79/17913	0.000916129	0.00765078	0.00526514	APOE/C1QTNF1/CD9/EDN1/F2R/F2RL1/FAP/LYN/NOS3/PDGFRA/PLAU/PLEK/PRKCD/PRKCQ/PROS1/SERPINE1/SERPINE2/THBS1	18
GO:0051090	regulation of DNA-binding transcription factor activity	65/1842	429/17913	0.000918057	0.00765608	0.00526879	AGT/AKT1/APP/AR/ARHGEF2/ARID5B/BEX1/BUD31/CAMK2A/CMKLR1/COPS5/CTNNB1/CYLD/CYP1B1/DDIT3/EDN1/EP300/ERC1/ESR1/FOS/FOXS1/FZD2/HAVCR2/HCK/HCLS1/HDAC4/HEYL/HIPK2/ID1/ID3/IL18R1/IL6/IRAK3/ITGB2/JAK2/JUN/KLF4/KRAS/MAP2K5/MIR1-1/MYOCD/NFKBIA/NUPR1/PIM1/PKD2/PRKCH/PRKCQ/PROX1/RELA/ROR1/RWDD1/S100A12/S100A8/S100A9/SFRP4/SMAD3/SMARCA4/STAT3/TAX1BP1/TGFB1/TRIB1/TRIM27/TRIM8/WWP2/ZC3H12A	65
GO:0032930	positive regulation of superoxide anion generation	7/1842	17/17913	0.000921128	0.00767088	0.00527898	AGT/CYBA/F2RL1/ITGB2/PRKCD/TGFB1/TYROBP	7
GO:0003018	vascular process in circulatory system	30/1842	161/17913	0.000933751	0.00776508	0.00534381	ACE/ACE2/ADCY6/AGT/AGTR1/AGTR2/AKT1/APOE/ARHGAP35/ATP1A2/COMP/DOCK4/EDN1/EDN2/EDNRA/F2R/F2RL1/GJA1/KCNA5/LEP/MYLK3/NOS3/NPPA/NPPB/PDE3A/RGS2/RHOA/SLC8A1/SLIT2/TGFB1	30
GO:0042593	glucose homeostasis	39/1842	227/17913	0.000936873	0.00778012	0.00535415	AKT1/ANO1/CAV3/CSRP3/CYBA/CYP11B1/ENDOG/FOXO1/GATA4/HMGN3/IGFBP5/INPP5K/LEP/LEPR/MAP4K4/MPC2/NADK/NDUFAF2/NME1/NOX4/OPA1/OXCT1/PDK4/PIK3CA/PTPN11/RAB11FIP5/RAF1/RMI1/SERPINF1/SIDT2/SIN3A/SLC16A1/SMARCA4/SOX4/STAT3/SUCNR1/UNC13B/VSNL1/XBP1	39
GO:0060070	canonical Wnt signaling pathway	50/1842	311/17913	0.000943058	0.00782052	0.00538195	APOE/CCAR2/CTHRC1/CTNNB1/CYLD/DAAM2/DAPK3/DDIT3/DIXDC1/DVL3/EGF/EGR1/FOXO1/FRZB/FZD2/GLI3/GNAQ/GSK3B/IGFBP1/IGFBP4/KLF4/KLHL12/LRP5/LRRK1/MIR1-1/MITF/MYH6/NKD2/NKX2-5/NRARP/PRICKLE1/PSMA3/PSMC2/RAPGEF1/RBMS3/RECK/RNF146/RYR2/SFRP1/SFRP4/SMAD3/SMURF2/SOX4/SOX7/SULF2/UBR5/USP34/WNK2/WWTR1/YAP1	50
GO:0042476	odontogenesis	25/1842	126/17913	0.000953997	0.00790016	0.00543676	ALPL/BSG/CTNNB1/EDN1/FOXO1/GLI3/HTRA1/ID3/ITGB4/LAMB1/MSX1/OSR1/PDGFRA/RHOA/ROGDI/RUNX2/SCN10A/SCN5A/SERPINE1/SSUH2/TGFB1/TGFB2/TGFB3/TNC/TNFRSF11B	25
GO:0071236	cellular response to antibiotic	28/1842	147/17913	0.00095659	0.00791057	0.00544393	ADCY3/ADCY6/AIFM1/ATP7A/AXL/BNIP3/CYBB/CYP1B1/EGR1/ENDOG/FDX1/FOXO1/FXN/ID3/IL6/IMPACT/KDM6B/KLF2/KLF4/MEF2C/MIR133A1/MIR133A2/NR4A3/PRKCD/RELA/SIRPA/TP53/ZC3H12A	28
GO:0061008	hepaticobiliary system development	26/1842	133/17913	0.000960804	0.00792818	0.00545604	ACAT1/ARID5B/ATP7A/CCND1/CEBPB/FBXW7/FRZB/GATA6/GLI3/HAMP/JUN/KRAS/MAN2A1/PIK3CA/PKD2/PROX1/PTPN3/QDPR/RELA/RGN/SMAD3/SULF2/TGFB1/TGFBR3/XBP1/ZMPSTE24	26
GO:0007259	JAK-STAT cascade	27/1842	140/17913	0.000961397	0.00792818	0.00545604	AGT/BCL3/CCL2/CRLF1/CYP1B1/EGF/F2R/FYN/HCLS1/HGS/IGF1/IL6/INPP5F/JAK2/LEP/LYN/MIR221/PECAM1/PKD2/PPP2CA/PTPN1/SOCS1/SOCS2/STAT3/STAT5B/TNFRSF1A/TSLP	27
GO:0071219	cellular response to molecule of bacterial origin	33/1842	183/17913	0.000965436	0.00795041	0.00547135	AKT1/ANKRD1/AXL/CCL2/CD14/CD68/CEBPB/CTSG/HAMP/HAVCR2/HCK/HMGB2/IL6/LITAF/LY96/LYN/MEF2C/MIR20A/NFKBIA/NOS3/PDE4D/RELA/RHOA/SASH1/SERPINE1/SIRPA/TGFB1/TRIB1/TRIM41/UPF1/XBP1/ZC3H12A/ZFP36	33
GO:0061045	negative regulation of wound healing	17/1842	73/17913	0.000969618	0.00797376	0.00548742	APOE/C1QTNF1/CD9/CDKN1A/EDN1/FAP/GJA1/NOS3/PDGFRA/PHLDB2/PLAU/PRKCD/PROS1/SERPINE1/SERPINE2/SMAD3/THBS1	17
GO:0048525	negative regulation of viral process	21/1842	99/17913	0.00097323	0.00799236	0.00550022	BST2/FCN1/FCN3/GSN/IFI16/IFIT1/IFITM1/IFITM2/IFITM3/INPP5K/ISG20/JUN/MIR221/PROX1/TNIP1/TRIM27/TRIM35/TRIM8/ZC3H12A/ZFP36/ZNF639	21
GO:0033157	regulation of intracellular protein transport	38/1842	220/17913	0.00097593	0.00800344	0.00550784	AGTR2/ATG13/ATP13A2/B3GAT3/BAG3/FBXW7/FYN/GLI3/GRASP/GSK3B/HCLS1/HDAC3/HRAS/HYAL2/INPP5K/IPO5/ITGB2/LCP1/LEP/MDFIC/MFF/PDCD5/PKIG/PRKCD/PTPN1/PTPN11/PTPN14/RAC2/RANGAP1/SAE1/SMAD3/SUPT6H/TGFB1/TMEM30B/TP53/UBR5/XPO4/ZC3H12A	38
GO:0042771	intrinsic apoptotic signaling pathway in response to DNA damage by p53 class mediator	12/1842	43/17913	0.000992157	0.00811404	0.00558395	BCL2/BCL3/CD44/CDKN1A/DDIT4/EP300/HIPK1/HIPK2/IFI16/NUPR1/TAF9/TP53	12
GO:0051602	response to electrical stimulus	12/1842	43/17913	0.000992157	0.00811404	0.00558395	ADSSL1/AIF1/BRD1/BTG2/CD14/CYFIP1/GRM1/OPA1/PALM/RAB3A/S100A13/TRIM63	12
GO:0071276	cellular response to cadmium ion	10/1842	32/17913	0.000994435	0.00811657	0.00558569	AKT1/ATP7A/CYBB/FOS/GSN/JUN/MT1A/MT1E/MT1G/MT1X	10
GO:0048145	regulation of fibroblast proliferation	19/1842	86/17913	0.000996579	0.00811657	0.00558569	AGT/AGTR2/CDKN1A/CTNNB1/ESR1/FN1/IGF1/JUN/MED25/MYC/NUPR1/PDGFRA/PDGFRB/SFRP1/SKI/TGFB1/TP53/ZMIZ1/ZMPSTE24	19
GO:1901863	positive regulation of muscle tissue development	19/1842	86/17913	0.000996579	0.00811657	0.00558569	BCL2/BMP10/CTNNB1/EDN1/GATA6/GJA1/HAMP/HEY2/IGF1/MEF2C/MIR1-1/MIR590/MYOCD/PIM1/RBM24/TBX5/TGFB1/TGFBR3/YAP1	19
GO:0033866	nucleoside bisphosphate biosynthetic process	16/1842	67/17913	0.00101442	0.00820547	0.00564687	ACACB/ACAT1/ACSL3/ACSS2/DLD/FASN/GCDH/MLYCD/MPC2/PANK3/PAPSS1/PDHA1/PDHB/PDK4/SCD/SNCA	16
GO:0034030	ribonucleoside bisphosphate biosynthetic process	16/1842	67/17913	0.00101442	0.00820547	0.00564687	ACACB/ACAT1/ACSL3/ACSS2/DLD/FASN/GCDH/MLYCD/MPC2/PANK3/PAPSS1/PDHA1/PDHB/PDK4/SCD/SNCA	16
GO:0034033	purine nucleoside bisphosphate biosynthetic process	16/1842	67/17913	0.00101442	0.00820547	0.00564687	ACACB/ACAT1/ACSL3/ACSS2/DLD/FASN/GCDH/MLYCD/MPC2/PANK3/PAPSS1/PDHA1/PDHB/PDK4/SCD/SNCA	16
GO:0061180	mammary gland epithelium development	16/1842	67/17913	0.00101442	0.00820547	0.00564687	AKT1/AR/CAV3/CCL11/CCND1/CEBPB/DDR1/DEAF1/ESR1/IRF6/JAK2/KDM5B/LBH/MSX1/RTN4/TGFB1	16
GO:1903391	regulation of adherens junction organization	16/1842	67/17913	0.00101442	0.00820547	0.00564687	COL16A1/DAPK3/EPHA3/FAM107A/LDB1/MAP4K4/MAPRE2/PEAK1/PHLDB2/PPM1F/RHOA/S100A10/SFRP1/SMAD3/THBS1/THY1	16
GO:0033500	carbohydrate homeostasis	39/1842	228/17913	0.00102059	0.00824407	0.00567344	AKT1/ANO1/CAV3/CSRP3/CYBA/CYP11B1/ENDOG/FOXO1/GATA4/HMGN3/IGFBP5/INPP5K/LEP/LEPR/MAP4K4/MPC2/NADK/NDUFAF2/NME1/NOX4/OPA1/OXCT1/PDK4/PIK3CA/PTPN11/RAB11FIP5/RAF1/RMI1/SERPINF1/SIDT2/SIN3A/SLC16A1/SMARCA4/SOX4/STAT3/SUCNR1/UNC13B/VSNL1/XBP1	39
GO:0030195	negative regulation of blood coagulation	13/1842	49/17913	0.00104259	0.00835726	0.00575133	APOE/C1QTNF1/CD9/EDN1/FAP/NOS3/PDGFRA/PLAU/PRKCD/PROS1/SERPINE1/SERPINE2/THBS1	13
GO:0003170	heart valve development	15/1842	61/17913	0.00104578	0.00835726	0.00575133	ADAMTS9/DCHS1/EMILIN1/GATA4/HEY2/HEYL/MEF2C/NOS3/NOTCH2/SLIT2/SOX4/TBX5/TGFB1/TGFB2/TNFRSF1A	15
GO:0051893	regulation of focal adhesion assembly	15/1842	61/17913	0.00104578	0.00835726	0.00575133	COL16A1/DAPK3/EPHA3/FAM107A/LDB1/MAP4K4/PEAK1/PHLDB2/PPM1F/RHOA/S100A10/SFRP1/SMAD3/THBS1/THY1	15
GO:0090109	regulation of cell-substrate junction assembly	15/1842	61/17913	0.00104578	0.00835726	0.00575133	COL16A1/DAPK3/EPHA3/FAM107A/LDB1/MAP4K4/PEAK1/PHLDB2/PPM1F/RHOA/S100A10/SFRP1/SMAD3/THBS1/THY1	15
GO:0043302	positive regulation of leukocyte degranulation	8/1842	22/17913	0.00104842	0.00835726	0.00575133	F2RL1/FCER1G/FGR/GAB2/GATA2/ITGB2/NPPA/VAMP8	8
GO:0071378	cellular response to growth hormone stimulus	8/1842	22/17913	0.00104842	0.00835726	0.00575133	GDF15/JAK2/LYN/PTPN1/PXN/SOCS2/STAT3/STAT5B	8
GO:0071875	adrenergic receptor signaling pathway	8/1842	22/17913	0.00104842	0.00835726	0.00575133	ADRB1/ATP2B4/MIR1-1/MIR133A1/MIR133A2/PDE4D/PLN/RGS2	8
GO:0002063	chondrocyte development	9/1842	27/17913	0.00105642	0.00835726	0.00575133	CHSY1/COL27A1/COMP/EIF2AK3/FGF18/RUNX2/SERPINH1/SULF1/SULF2	9
GO:0006735	NADH regeneration	9/1842	27/17913	0.00105642	0.00835726	0.00575133	ALDOA/ALDOC/BPGM/ENO1/ENO3/GPI/PFKL/PFKM/PGAM2	9
GO:0043304	regulation of mast cell degranulation	9/1842	27/17913	0.00105642	0.00835726	0.00575133	FCER1G/FES/FGR/GAB2/GATA2/LYN/NPPA/RAC2/VAMP8	9
GO:0051450	myoblast proliferation	9/1842	27/17913	0.00105642	0.00835726	0.00575133	GATA6/IGF1/KCNA5/MEIS2/MIR1-1/MIR133A1/MIR133A2/SOX15/ZNF609	9
GO:0061621	canonical glycolysis	9/1842	27/17913	0.00105642	0.00835726	0.00575133	ALDOA/ALDOC/BPGM/ENO1/ENO3/GPI/PFKL/PFKM/PGAM2	9
GO:0061718	glucose catabolic process to pyruvate	9/1842	27/17913	0.00105642	0.00835726	0.00575133	ALDOA/ALDOC/BPGM/ENO1/ENO3/GPI/PFKL/PFKM/PGAM2	9
GO:0001885	endothelial cell development	14/1842	55/17913	0.00105762	0.00835726	0.00575133	COL18A1/CTNNB1/F2RL1/FASN/HEG1/ID1/MSN/PDE4D/PECAM1/RAPGEF1/S1PR3/SOX18/TJP1/TNFRSF1A	14
GO:0019320	hexose catabolic process	14/1842	55/17913	0.00105762	0.00835726	0.00575133	ALDOA/ALDOC/BPGM/ENO1/ENO3/GALK1/GLB1/GPI/LRP5/PFKL/PFKM/PGAM2/TKTL1/TP53	14
GO:0033008	positive regulation of mast cell activation involved in immune response	6/1842	13/17913	0.00106218	0.00835726	0.00575133	FCER1G/FGR/GAB2/GATA2/NPPA/VAMP8	6
GO:0043306	positive regulation of mast cell degranulation	6/1842	13/17913	0.00106218	0.00835726	0.00575133	FCER1G/FGR/GAB2/GATA2/NPPA/VAMP8	6
GO:0072182	regulation of nephron tubule epithelial cell differentiation	6/1842	13/17913	0.00106218	0.00835726	0.00575133	CTNNB1/FAT4/OSR1/PROM1/WWTR1/YAP1	6
GO:0051101	regulation of DNA binding	24/1842	120/17913	0.00106283	0.00835726	0.00575133	BCL3/CALM2/CTNNB1/DDIT3/EGF/EP300/FBXW7/HEY2/HIPK2/HMGB2/IFI16/IGF1/JAK2/JUN/KLF4/MSX1/MYOCD/NFKBIA/NME1/NSD1/SIN3A/SKI/TGFB1/ZMPSTE24	24
GO:1905477	positive regulation of protein localization to membrane	24/1842	120/17913	0.00106283	0.00835726	0.00575133	ACSL3/AKT1/BCL2/CLIP3/CNPY4/EPHA3/FYN/HRAS/ITGB1/ITGB2/LGALS3/MFF/NKD2/PDCD5/PRKCH/PTPN9/SORBS1/SPTBN1/TGFB1/TP53/TP53BP2/YWHAG/YWHAH/YWHAQ	24
GO:0033865	nucleoside bisphosphate metabolic process	25/1842	127/17913	0.00107413	0.00839732	0.0057789	ACACB/ACAT1/ACOT6/ACOT8/ACSF2/ACSL3/ACSS2/DGAT1/DLD/FASN/GCDH/HSD17B4/MCCC2/MLYCD/MPC2/PANK3/PAPSS1/PDHA1/PDHB/PDK4/PMVK/SCD/SNCA/SUCLA2/THEM4	25
GO:0033875	ribonucleoside bisphosphate metabolic process	25/1842	127/17913	0.00107413	0.00839732	0.0057789	ACACB/ACAT1/ACOT6/ACOT8/ACSF2/ACSL3/ACSS2/DGAT1/DLD/FASN/GCDH/HSD17B4/MCCC2/MLYCD/MPC2/PANK3/PAPSS1/PDHA1/PDHB/PDK4/PMVK/SCD/SNCA/SUCLA2/THEM4	25
GO:0034032	purine nucleoside bisphosphate metabolic process	25/1842	127/17913	0.00107413	0.00839732	0.0057789	ACACB/ACAT1/ACOT6/ACOT8/ACSF2/ACSL3/ACSS2/DGAT1/DLD/FASN/GCDH/HSD17B4/MCCC2/MLYCD/MPC2/PANK3/PAPSS1/PDHA1/PDHB/PDK4/PMVK/SCD/SNCA/SUCLA2/THEM4	25
GO:0030260	entry into host cell	26/1842	134/17913	0.00107785	0.00839732	0.0057789	ACE2/AXL/CBL/CD209/CTNNB1/CTSB/CXADR/CXCR4/FCN1/FCN3/GSN/HYAL2/IFITM1/IFITM2/IFITM3/ITGA5/ITGB1/ITGB5/LDLR/NPC1/PVR/TFRC/TRIM8/VAMP8/WWP2/ZNF639	26
GO:0044409	entry into host	26/1842	134/17913	0.00107785	0.00839732	0.0057789	ACE2/AXL/CBL/CD209/CTNNB1/CTSB/CXADR/CXCR4/FCN1/FCN3/GSN/HYAL2/IFITM1/IFITM2/IFITM3/ITGA5/ITGB1/ITGB5/LDLR/NPC1/PVR/TFRC/TRIM8/VAMP8/WWP2/ZNF639	26
GO:0051806	entry into cell of other organism involved in symbiotic interaction	26/1842	134/17913	0.00107785	0.00839732	0.0057789	ACE2/AXL/CBL/CD209/CTNNB1/CTSB/CXADR/CXCR4/FCN1/FCN3/GSN/HYAL2/IFITM1/IFITM2/IFITM3/ITGA5/ITGB1/ITGB5/LDLR/NPC1/PVR/TFRC/TRIM8/VAMP8/WWP2/ZNF639	26
GO:0051828	entry into other organism involved in symbiotic interaction	26/1842	134/17913	0.00107785	0.00839732	0.0057789	ACE2/AXL/CBL/CD209/CTNNB1/CTSB/CXADR/CXCR4/FCN1/FCN3/GSN/HYAL2/IFITM1/IFITM2/IFITM3/ITGA5/ITGB1/ITGB5/LDLR/NPC1/PVR/TFRC/TRIM8/VAMP8/WWP2/ZNF639	26
GO:0034764	positive regulation of transmembrane transport	35/1842	199/17913	0.00109332	0.00849549	0.00584646	ACTN2/AGT/AKT1/ATP1B1/ATP1B3/AZIN1/BRAF/CACNA2D1/CACNB2/CALM2/CASQ1/CCL2/CHCHD10/CLIP3/F2R/HSPA2/HTT/IGF1/JPH2/KCNIP2/KCNJ2/MIR1-1/NPPA/NR4A3/PKD2/PTPN11/RGN/RHOQ/RNF207/RYR2/SNCA/SORBS1/TESC/THY1/WNK2	35
GO:0050679	positive regulation of epithelial cell proliferation	35/1842	199/17913	0.00109332	0.00849549	0.00584646	AGTR1/AKT1/AR/ATP7A/CCL11/CCND1/CTNNB1/CYBA/FGF7/GATA2/HMGB2/HRAS/HTRA1/ID1/IGF1/JUN/KDM5B/LAMB1/MAP2K5/MIR29A/MYC/NME1/NOTCH2/NR4A3/NRAS/OSR1/PROX1/RTN4/SCN5A/SFRP1/SP1/STAT3/TGFB1/THBS4/XBP1	35
GO:0001818	negative regulation of cytokine production	47/1842	290/17913	0.00110991	0.00861308	0.00592738	APOA1/ASB1/AXL/BCL3/BCL6/BST2/CMKLR1/CYLD/DICER1/ERRFI1/F2RL1/FN1/GATA6/GPNMB/HAVCR2/IGF1/IL1RL1/IL6/IRAK3/KLF2/KLF4/LAPTM4B/LILRA5/LRRC32/MAP2K5/MIR20A/MIR221/MIR590/NAV3/OTUD5/OTUD7B/SERPINB1/SIRPA/SRGN/SSC5D/SYT11/TAX1BP1/TGFB1/TGFB2/TGFB3/THBS1/TRAF3IP1/TRIM27/TYROBP/VSIG4/ZC3H12A/ZFP36	47
GO:0032414	positive regulation of ion transmembrane transporter activity	21/1842	100/17913	0.00111482	0.00863983	0.00594579	ACTN2/ATP1B1/ATP1B3/CACNA2D1/CACNB2/CALM2/CASQ1/CCL2/CHCHD10/HSPA2/HTT/JPH2/KCNIP2/MIR1-1/NPPA/PKD2/RGN/RNF207/RYR2/TESC/WNK2	21
GO:0070373	negative regulation of ERK1 and ERK2 cascade	17/1842	74/17913	0.00114027	0.00881399	0.00606565	ATF3/DUSP1/DUSP26/EMILIN1/ERRFI1/KLF4/LYN/MIR133A1/MIR133A2/MIR221/PTPN1/PTPRR/RAPGEF1/SIRPA/SPRY4/TNIP1/WNK2	17
GO:1900182	positive regulation of protein localization to nucleus	17/1842	74/17913	0.00114027	0.00881399	0.00606565	AKT1/BAG3/EIF2AK3/FYN/GLI3/HCLS1/HDAC3/HYAL2/IPO5/LEP/PRKCD/SMAD3/TCP1/TGFB1/TRIM8/UBR5/ZC3H12A	17
GO:0002209	behavioral defense response	11/1842	38/17913	0.00114736	0.00885729	0.00609544	APOE/BCL2/DEAF1/EP300/GJA1/MECP2/MEF2C/PENK/USP46/VDAC1/VDAC3	11
GO:0048144	fibroblast proliferation	19/1842	87/17913	0.00115435	0.00889961	0.00612457	AGT/AGTR2/CDKN1A/CTNNB1/ESR1/FN1/IGF1/JUN/MED25/MYC/NUPR1/PDGFRA/PDGFRB/SFRP1/SKI/TGFB1/TP53/ZMIZ1/ZMPSTE24	19
GO:0045444	fat cell differentiation	38/1842	222/17913	0.00115975	0.00892962	0.00614522	ADRB1/AKT1/ARID5B/BNIP3/BSCL2/CCND1/CEBPB/CEBPD/CLIP3/CMKLR1/DDIT3/EP300/FBXO9/FOXO1/FRZB/GATA2/GDF10/IL6/KLF4/KLF5/LEP/LRP5/MB/NR4A3/RETN/RGS2/SFRP1/SMAD3/SOCS1/SORT1/TGFB1/TMEM120A/TRIO/WWTR1/XBP1/ZADH2/ZC3H12A/ZFP36	38
GO:0035264	multicellular organism growth	28/1842	149/17913	0.00118707	0.00912814	0.00628184	ADRB1/APP/AR/ARID5B/BCL2/CDKN1C/COMP/EP300/FOXS1/FXN/GDF15/GPD2/HEG1/IGF1/KLF2/NDUFS6/PDE4D/PIK3CA/PTPN11/RMI1/SGPL1/SOCS2/SOS1/STAT3/STAT5B/TP53/WWTR1/ZMPSTE24	28
GO:0007254	JNK cascade	35/1842	200/17913	0.00119711	0.00918004	0.00631756	AKT1/APP/COPS5/CYLD/DTNBP1/DVL3/EDN1/F2RL1/FGD2/GADD45A/GADD45B/GADD45G/HDAC3/HIPK2/HRAS/IGF1R/KLHL31/LTBR/MAP3K6/MAP4K4/MAPK8IP3/MDFIC/PTPN1/RAP2A/RAPGEF1/SASH1/SFRP1/SH3RF1/SH3RF2/SH3RF3/SIRPA/TNFRSF19/TPD52L1/TRIB1/ZMYND11	35
GO:0046718	viral entry into host cell	24/1842	121/17913	0.00119913	0.00918004	0.00631756	ACE2/AXL/CD209/CTSB/CXADR/CXCR4/FCN1/FCN3/GSN/HYAL2/IFITM1/IFITM2/IFITM3/ITGA5/ITGB1/ITGB5/LDLR/NPC1/PVR/TFRC/TRIM8/VAMP8/WWP2/ZNF639	24
GO:0019359	nicotinamide nucleotide biosynthetic process	27/1842	142/17913	0.00120003	0.00918004	0.00631756	ALDOA/ALDOC/BPGM/DDIT4/ENO1/ENO3/GALK1/GPI/HAAO/HDAC4/IDH2/IGF1/LDHA/NADK/NADK2/NAMPT/NNMT/NUP188/NUP214/NUPR1/PFKL/PFKM/PGAM2/POM121C/PRKAG2/STAT3/TP53	27
GO:0019363	pyridine nucleotide biosynthetic process	27/1842	142/17913	0.00120003	0.00918004	0.00631756	ALDOA/ALDOC/BPGM/DDIT4/ENO1/ENO3/GALK1/GPI/HAAO/HDAC4/IDH2/IGF1/LDHA/NADK/NADK2/NAMPT/NNMT/NUP188/NUP214/NUPR1/PFKL/PFKM/PGAM2/POM121C/PRKAG2/STAT3/TP53	27
GO:0042698	ovulation cycle	16/1842	68/17913	0.00120204	0.0091836	0.00632001	AXL/CASP3/EGR1/ESR1/GABRB1/LEP/NOS3/PDGFRA/RETN/SERPINF1/SGPL1/SLIT2/STAT5B/TGFB2/TGFB3/TIMP4	16
GO:0043491	protein kinase B signaling	44/1842	268/17913	0.00120527	0.00919642	0.00632883	AKT1/AXL/C1QTNF1/CAV3/CCL2/DDIT3/EGF/ESR1/FGF18/FGF7/FYN/GATA4/GCNT2/GDF15/HBEGF/HCLS1/HIP1/HYAL2/IGF1/IGFBP5/INPP5F/INPP5K/ITGB1/KLF4/LEP/MIR20A/MIR221/MIR29A/MIR451A/NOX4/PDGFRA/PDGFRB/PIK3CA/PIK3CG/PPP2R5C/PTPN11/RAC2/RAPGEF1/RRAS/RTN4/TGFB1/THBS1/THEM4/TNFAIP8L3	44
GO:0045216	cell-cell junction organization	25/1842	128/17913	0.00120712	0.00919864	0.00633036	ACE/ACE2/AGT/CD9/CXADR/DLG5/DSP/F2R/F2RL1/FSCN1/GJA1/GNPAT/HEG1/NLGN4X/PLEKHA7/PRKCH/RHOA/SMAD3/TGFB1/TGFB2/TGFB3/TJP1/TLN1/VCL/XIRP2	25
GO:0090092	regulation of transmembrane receptor protein serine/threonine kinase signaling pathway	37/1842	215/17913	0.00120934	0.00920373	0.00633386	BMP10/CAV3/CDKN1C/CREBBP/EMILIN1/EP300/FBN1/GATA4/GDF10/GLG1/GOT1/HIPK2/HTRA1/LTBP4/MIR20A/MSX1/MYOCD/NUMA1/RASL11B/RBPMS/SFRP1/SFRP4/SKI/SMAD3/SMURF1/SMURF2/SPTBN1/SULF1/TGFB1/TGFB3/TGFBR3/THBS1/TP53/VWC2/WWTR1/ZEB1/ZNF423	37
GO:0048640	negative regulation of developmental growth	20/1842	94/17913	0.00122176	0.00928635	0.00639072	ADRB1/BCL11A/CAV3/CDKN1A/FXN/GDF15/GJA1/MAP2/MEIS1/MIR1-1/RGS2/RGS4/RTN4/SFRP1/SOCS2/SPP1/TBX5/TLL2/ULK2/WWC1	20
GO:0060326	cell chemotaxis	42/1842	253/17913	0.0012333	0.00936199	0.00644277	ABCC1/AGTR1/AIF1/CCL11/CCL2/CMKLR1/CORO1A/CXADR/CXCR4/DOCK4/DUSP1/EDN1/EDN2/F2RL1/FGF18/HBEGF/HMGB2/IL6/ITGA9/ITGB2/KARS/LGALS3/LYN/MMP28/PARVA/PDE4D/PDGFRA/PDGFRB/PIK3CG/PRKCD/PRKCQ/RAC2/S100A12/S100A8/S100A9/SERPINE1/SLIT2/SMOC2/SWAP70/TGFB2/THBS1/THBS4	42
GO:0010043	response to zinc ion	12/1842	44/17913	0.00123831	0.00938803	0.00646069	ATP13A2/ATP7A/HAAO/HAMP/MT1A/MT1E/MT1G/MT1M/MT1X/MT2A/PLN/S100A8	12
GO:1904950	negative regulation of establishment of protein localization	34/1842	193/17913	0.00124084	0.00939513	0.00646558	APOA1/APOE/BAG3/BMP8A/F2R/F2RL1/FN1/IDH2/INPP5K/LILRA5/LRRC32/MAP4K4/MDFIC/MIDN/MIR20A/MIR590/NDFIP2/NDUFAF2/PFKL/PKIG/PPM1F/PTPN11/RAB11FIP3/RAB11FIP5/RANGAP1/SERPINB1/SFRP1/SRGN/SSC5D/SYT11/TRIM27/VSNL1/WWP2/ZC3H12A	34
GO:0014068	positive regulation of phosphatidylinositol 3-kinase signaling	18/1842	81/17913	0.00124639	0.00941311	0.00647795	AGT/CBL/F2R/F2RL1/FGR/FYN/HCLS1/HCST/IGF1/JAK2/LEP/LYN/PDGFRA/PDGFRB/PIK3CA/PIK3CG/TGFB2/UNC5B	18
GO:0046209	nitric oxide metabolic process	18/1842	81/17913	0.00124639	0.00941311	0.00647795	AGT/AGTR2/AIF1/AKT1/ATP2B4/CYP1B1/EDN1/GLA/ITGB2/JAK2/KLF2/KLF4/NOS3/PKD2/RGN/SIRPA/SMAD3/ZC3H12A	18
GO:0010658	striated muscle cell apoptotic process	15/1842	62/17913	0.00125051	0.00943219	0.00649108	AGT/BAG3/BNIP3/CAMK2A/GATA4/HEY2/JAK2/MIR133A1/MIR133A2/MIR20A/MIR590/MYOCD/NKX2-5/NUPR1/TP53	15
GO:0034504	protein localization to nucleus	38/1842	223/17913	0.00126254	0.00951082	0.00654519	AGT/AGTR2/AKT1/BAG3/BCL3/CDKN1A/CHCHD10/DCLK2/EIF2AK3/FYN/GLI3/GSK3B/HCLS1/HDAC3/HYAL2/IPO5/IPO9/LEP/LMNA/MDFIC/MSX1/NFKBIA/OTUD7B/PKIG/PRICKLE1/PRKCD/RANGAP1/RPF2/SIN3A/SMAD3/STAT3/TCP1/TGFB1/TOR1AIP1/TP53/TRIM8/UBR5/ZC3H12A	38
GO:0048661	positive regulation of smooth muscle cell proliferation	21/1842	101/17913	0.00127371	0.00958022	0.00659296	AGT/AIF1/AKT1/CALCRL/CYBA/EDN1/HBEGF/HDAC4/IGF1/IGFBP5/IL6/JAK2/JUN/MFN2/MIR20A/MIR221/MMP2/NAMPT/NR4A3/PDGFRB/THBS1	21
GO:0032873	negative regulation of stress-activated MAPK cascade	13/1842	50/17913	0.00127823	0.00958022	0.00659296	AKT1/CYLD/DUSP1/F2RL1/FOXO1/HDAC3/KLHL31/MIR20A/MYC/SFRP1/SH3RF2/SIRPA/ZMYND11	13
GO:0070303	negative regulation of stress-activated protein kinase signaling cascade	13/1842	50/17913	0.00127823	0.00958022	0.00659296	AKT1/CYLD/DUSP1/F2RL1/FOXO1/HDAC3/KLHL31/MIR20A/MYC/SFRP1/SH3RF2/SIRPA/ZMYND11	13
GO:0099024	plasma membrane invagination	13/1842	50/17913	0.00127823	0.00958022	0.00659296	AIF1/DOCK1/ELMO1/F2RL1/FCER1G/GATA2/GSN/ITGB2/MARCO/MFGE8/MYH9/RHOA/THBS1	13
GO:0045017	glycerolipid biosynthetic process	41/1842	246/17913	0.00129515	0.00968293	0.00666364	ACSL3/AGK/AGPAT2/AJUBA/APOA1/ARF3/CHPT1/DGAT1/ETNPPL/FBXW7/GNPAT/GPD1L/INPP4B/INPP5F/INPP5K/LCLAT1/LDLR/LPCAT4/MTMR12/MTMR3/PGAP1/PGS1/PI4K2A/PIGG/PIK3CA/PIK3CG/PIK3R6/PLA2G2A/PLCE1/PLD6/PLEKHA4/PLIN5/PTDSS1/PTDSS2/RGN/SLC44A1/SLC44A2/STARD7/SYNJ2/TAMM41/TAZ	41
GO:0030203	glycosaminoglycan metabolic process	29/1842	157/17913	0.00129614	0.00968293	0.00666364	ABCC5/AGRN/AKT1/B3GAT3/CD44/CHST3/CHST7/CHSY1/CHSY3/CSGALNACT2/EGF/EXT1/EXT2/FMOD/GCNT2/GLB1/GPC6/HSPG2/HYAL2/IDUA/ITIH5/LUM/LYVE1/OMD/PDGFRB/PIM1/PRELP/ST3GAL2/TGFB1	29
GO:0098751	bone cell development	10/1842	33/17913	0.00129684	0.00968293	0.00666364	ABI1/ANXA2/EP300/FBN1/FBXW7/LRRK1/MEIS1/NOTCH2/PTPN11/TYROBP	10
GO:0002683	negative regulation of immune system process	67/1842	451/17913	0.00130167	0.00970678	0.00668005	AKT1/APOA1/AXL/BCL6/BST2/C1QC/CASP3/CCL2/CD14/CD59/CD68/CEBPB/CTNNB1/DLG5/DUSP1/ELF1/EMILIN1/F2RL1/FBN1/FBXW7/FCER1G/GATA2/GLI3/GPNMB/HAVCR2/HTRA1/IFI16/IL17D/IL1RL1/IRAK3/LDB1/LDLR/LGALS3/LRRC32/LY96/LYN/MAFB/MEIS1/MEIS2/MIR221/MMP28/MYC/NFKBIA/NME1/NRARP/PDCD1/PDE5A/PIAS3/SFRP1/SLIT2/SOCS1/STAT5B/TGFB1/TGFB2/TGFB3/THBS1/THY1/TMEM178A/TRAF3IP1/TRAFD1/TRIB1/TRIM27/TSPAN32/TYROBP/VSIG4/ZC3H12A/ZFP…	67
GO:0048588	developmental cell growth	37/1842	216/17913	0.00131805	0.00981659	0.00675562	AGT/AGTR2/APOE/APP/AUTS2/BCL11A/CAV3/CPNE5/CTNNB1/CXCR4/CYFIP1/DDR1/EDN1/FN1/GATA4/GSK3B/HAMP/IGF1/IMPACT/ITGB1/MAP1B/MAP2/NPPA/PDLIM5/POSTN/RGS2/RGS4/RTN4/SH3GL2/SLC9A6/SLIT2/SMURF1/SORBS2/SPP1/SYT17/ULK2/VCL	37
GO:0006909	phagocytosis	49/1842	308/17913	0.00132692	0.0098702	0.00679251	ABI1/ACTB/AIF1/APOA1/ARPC1B/ARPC3/ATG3/AXL/CCL2/CD14/CD93/CORO1A/CYBA/CYFIP1/DOCK1/DOCK2/ELMO1/F2RL1/FCER1G/FCGR2A/FCN1/FCN3/FGR/FYN/GATA2/GSN/HCK/ITGB1/ITGB2/LDLR/LEP/LEPR/LYN/MARCO/MFGE8/MIR20A/MYH9/PECAM1/PIK3CA/PRKCD/RAPGEF1/SIRPA/SYT11/TGFB1/THBS1/TYROBP/WAS/WIPF1/WIPF3	49
GO:0010822	positive regulation of mitochondrion organization	23/1842	115/17913	0.00133649	0.00991649	0.00682437	ATG13/BCL2/BNIP3/CAMKK2/CHCHD10/DNM1L/FBXW7/GSK3B/HTT/MFF/MFN2/MLLT11/OPA1/PDCD5/PLD6/RAC2/SAE1/SMURF1/TP53/TP53BP2/YWHAG/YWHAH/YWHAQ	23
GO:0017015	regulation of transforming growth factor beta receptor signaling pathway	23/1842	115/17913	0.00133649	0.00991649	0.00682437	CAV3/CDKN1C/CREBBP/EMILIN1/EP300/FBN1/GLG1/GOT1/HIPK2/HTRA1/LTBP4/MYOCD/RASL11B/SKI/SMAD3/SMURF1/SMURF2/TGFB1/TGFB3/TGFBR3/THBS1/TP53/ZEB1	23
GO:0008037	cell recognition	25/1842	129/17913	0.00135408	0.0100344	0.00690551	ALDOA/APP/ARHGAP35/CASP3/CD209/CD9/CLGN/CNTNAP3/CXCR4/DOCK2/EPHA3/FCN1/FCN3/HAVCR2/LGALS3/MFGE8/MSN/NCK2/PCDH12/PECAM1/PRF1/RTN4/ST6GALNAC6/TCP1/VDAC2	25
GO:0007221	positive regulation of transcription of Notch receptor target	7/1842	18/17913	0.00137436	0.0101466	0.00698272	CREBBP/EP300/HEYL/MAML1/MAML2/MAML3/WWC1	7
GO:0060977	coronary vasculature morphogenesis	7/1842	18/17913	0.00137436	0.0101466	0.00698272	ARID2/HEY2/MIR1-1/PDGFRB/SGCD/TBX5/TGFBR3	7
GO:0071800	podosome assembly	7/1842	18/17913	0.00137436	0.0101466	0.00698272	ARHGEF2/FSCN1/GSN/HCK/LCP1/MSN/RHOA	7
GO:0033273	response to vitamin	20/1842	95/17913	0.00140085	0.0103293	0.00710848	ALPL/CCND1/FES/GATA4/GSN/HAMP/KANK2/LEP/MAP1B/MTHFR/NNT/PENK/PIM1/POSTN/RELA/SFRP1/SPARC/SPP1/TGFB1/TNC	20
GO:0048662	negative regulation of smooth muscle cell proliferation	16/1842	69/17913	0.00141813	0.0104437	0.00718719	AIF1/CDKN1A/CNN1/IGFBP3/IGFBP5/KLF4/MEF2C/MFN2/MIR1-1/MIR133A1/MIR133A2/MYOCD/NPR3/TGFB3/TPM1/TRIB1	16
GO:0045921	positive regulation of exocytosis	18/1842	82/17913	0.00144628	0.0106241	0.00731133	ATP13A2/CACNB2/DNM1L/F2RL1/FCER1G/FGR/GAB2/GATA2/HGS/ITGB2/NPPA/RAB15/RAB3A/SNCA/STAM/UNC13B/VAMP8/VSNL1	18
GO:0033003	regulation of mast cell activation	11/1842	39/17913	0.0014516	0.0106241	0.00731133	FCER1G/FES/FGR/GAB2/GATA2/LYN/NPPA/NR4A3/RAC2/TSLP/VAMP8	11
GO:0042596	fear response	11/1842	39/17913	0.0014516	0.0106241	0.00731133	ADRB1/APOE/BCL2/DEAF1/GJA1/MECP2/MEF2C/PENK/USP46/VDAC1/VDAC3	11
GO:0090279	regulation of calcium ion import	11/1842	39/17913	0.0014516	0.0106241	0.00731133	CAV3/CCL2/CTNNB1/EGF/FYN/LGALS3/PDGFRB/PKD2/PLN/SLC30A1/TRIM27	11
GO:2000008	regulation of protein localization to cell surface	11/1842	39/17913	0.0014516	0.0106241	0.00731133	ACTN2/AKT1/CAV3/CTNNB1/EGF/FCER1G/GPD1L/MAP1A/PICALM/RAB11FIP5/TYROBP	11
GO:0072215	regulation of metanephros development	8/1842	23/17913	0.00146396	0.0106769	0.00734768	AGTR2/CTNNB1/EGR1/FAT4/MYC/PDGFRB/WWTR1/YAP1	8
GO:2000291	regulation of myoblast proliferation	8/1842	23/17913	0.00146396	0.0106769	0.00734768	GATA6/KCNA5/MEIS2/MIR1-1/MIR133A1/MIR133A2/SOX15/ZNF609	8
GO:1905952	regulation of lipid localization	28/1842	151/17913	0.00146422	0.0106769	0.00734768	ACACB/AGT/AGTR1/AGTR2/AKT1/ANXA2/APOA1/APOE/C1QTNF1/EDN1/EGF/FBXW7/FITM1/IL6/KDM5B/LEP/LIPG/NFKBIA/PLA2R1/PLIN5/PLTP/PRKCD/PTPN11/RETN/SCP2/SPP1/THBS1/ZC3H12A	28
GO:0030111	regulation of Wnt signaling pathway	53/1842	341/17913	0.00147862	0.0107554	0.00740172	ANKRD6/APOE/APP/CCAR2/CTHRC1/CTNNB1/CYLD/DAAM2/DAPK3/DDIT3/DIXDC1/DVL3/EGF/EGR1/ESR1/FOXO1/FRZB/GLI3/GNAQ/GRB10/GSK3B/IGFBP1/IGFBP4/KLHL12/LRRK1/MDFIC/MIR1-1/NKD2/NKX2-5/NRARP/PPP2CA/PRICKLE1/PSMA3/PSMC2/RAPGEF1/RBMS3/RECK/RNF146/SFRP1/SFRP4/SKI/SMAD3/SMARCA4/SMURF2/SOX4/SOX7/SULF1/SULF2/UBR5/USP34/WNK2/WWTR1/YAP1	53
GO:0031331	positive regulation of cellular catabolic process	53/1842	341/17913	0.00147862	0.0107554	0.00740172	AKT1/APOE/BAG3/BNIP3/BTG2/CALCOCO2/CAMKK2/CAV3/CTSC/EGF/ENDOG/FBXW7/FMR1/FOXO1/FYCO1/GSK3B/HTT/IGF1/IL6/LDLR/LRSAM1/METTL16/MFN2/MSN/NKD2/NNT/NUPR1/PLEKHF1/PLIN5/PLK2/PRICKLE1/PRKCD/PSMC2/PTPN1/RBM24/RGN/RNF152/SCOC/SH3D19/SH3RF2/SMCR8/SMURF1/SNCA/SPTLC2/SUPT5H/TRIB1/TRIM8/UBQLN2/ULK1/UPF1/ZC3H12A/ZFAND2A/ZFP36	53
GO:0055025	positive regulation of cardiac muscle tissue development	15/1842	63/17913	0.00148789	0.0108096	0.00743898	BMP10/EDN1/GATA6/HAMP/HEY2/IGF1/MEF2C/MIR1-1/MIR590/MYOCD/PIM1/TBX5/TGFB1/TGFBR3/YAP1	15
GO:0046777	protein autophosphorylation	36/1842	210/17913	0.00149817	0.0108709	0.00748117	ACE/AKT1/ATP13A2/CALM2/CAMK2A/CAMKK2/DAPK3/DDR1/EIF2AK3/ERRFI1/FES/FGR/GPNMB/GSK3B/HCK/IGF1R/IMPACT/IRAK3/JAK2/JUN/LYN/MAP2K2/MAP3K3/MARK3/MVP/MYLK2/PDGFRA/PDGFRB/PEAK1/PIM1/RAP2A/THY1/TRPM7/ULK1/ULK2/WNK2	36
GO:0034341	response to interferon-gamma	31/1842	173/17913	0.00150238	0.0108856	0.00749127	AIF1/BST2/CALCOCO2/CAMK2A/CCL2/CD44/CDC42EP4/DAPK3/EDN1/FLNB/GSN/HCK/HLA-DPB1/HLA-DRB4/IFI30/IFITM1/IFITM2/IFITM3/IRF6/JAK2/MT2A/PRKCD/SEC61A1/SIRPA/SNCA/SOCS1/TP53/TRIM8/VAMP3/WAS/ZYX	31
GO:0022407	regulation of cell-cell adhesion	59/1842	389/17913	0.00150387	0.0108856	0.00749127	ADAM19/AIF1/AKT1/APOA1/BCL6/C1QTNF1/CASP3/CCL2/CD209/CD44/CD9/CEBPB/CORO1A/CYLD/DLG5/FYN/GCNT2/GLI3/GPNMB/HAVCR2/HLA-DPB1/IGF1/IL6/ITGB2/JAK2/KLF4/LEP/LGALS3/LRRC32/LYN/MAP2K5/MAP3K8/MBP/MIR221/NCK2/NFKBIZ/NR4A3/NRARP/PDCD1/PDE5A/PIK3CA/PIK3R6/PPM1F/PRKCD/PRKCQ/PTPN11/RELA/RHOA/SERPINE2/SOCS1/STAT5B/SWAP70/TFRC/TGFB1/THY1/VSIG4/XBP1/ZC3H12A/ZMIZ1	59
GO:0050709	negative regulation of protein secretion	26/1842	137/17913	0.00150602	0.0108878	0.00749282	APOA1/APOE/BMP8A/F2R/F2RL1/FN1/IDH2/LILRA5/LRRC32/MAP4K4/MIDN/MIR20A/MIR590/NDUFAF2/PFKL/PTPN11/RAB11FIP3/RAB11FIP5/SERPINB1/SFRP1/SRGN/SSC5D/SYT11/TRIM27/VSNL1/ZC3H12A	26
GO:0007162	negative regulation of cell adhesion	44/1842	271/17913	0.00151236	0.0109203	0.00751519	AKT1/APOA1/ARHGDIA/ARHGDIB/BCL6/C1QTNF1/CASP3/CD9/CEBPB/CYP1B1/DLG5/DUSP1/FAM107A/GCNT2/GLI3/GPNMB/HAVCR2/JAK2/JAM2/KLF4/LGALS3/LRRC32/MAP2K5/MAP4K4/MBP/MIR221/NRARP/PDE5A/PHLDB2/POSTN/PPM1F/PRKCD/PTPN11/RHOA/SERPINE1/SERPINE2/SOCS1/SPOCK1/SWAP70/TGFB1/THBS1/TNC/VSIG4/ZC3H12A	44
GO:0010463	mesenchymal cell proliferation	12/1842	45/17913	0.00153291	0.0110418	0.00759878	CTNNB1/DCHS1/FAT4/FBXW4/FGF7/LMNA/LRP5/MSX1/MYC/OSR1/PRRX1/ZEB1	12
GO:0030199	collagen fibril organization	12/1842	45/17913	0.00153291	0.0110418	0.00759878	AEBP1/ATP7A/COL12A1/COL14A1/COL5A2/COMP/CYP1B1/EMILIN1/FMOD/LOXL2/LUM/TGFB2	12
GO:0010665	regulation of cardiac muscle cell apoptotic process	14/1842	57/17913	0.00153735	0.0110603	0.00761154	AGT/BNIP3/CAMK2A/GATA4/HEY2/JAK2/MIR133A1/MIR133A2/MIR20A/MIR590/MYOCD/NKX2-5/NUPR1/TP53	14
GO:0001654	eye development	53/1842	342/17913	0.00157915	0.0113472	0.00780899	AGTPBP1/ALDH1A3/ARHGAP35/ATP2B4/BCL2/CACNA1C/CDKN1C/COL4A1/COL5A2/COL8A1/CRYAB/CTNNB1/CYP1B1/FAT1/FBN1/GJA1/GLI3/GPD2/HIPK1/HIPK2/IFT140/JUN/KDM5B/KLF4/LIMK2/LRP5/MAN2A1/MEIS1/MEIS2/MFN2/MITF/MYOM1/OPA1/PDGFRA/PDGFRB/PROM1/PROX1/RDH10/SCO2/SERPINF1/SKI/SKIL/SLC4A5/SMAD3/SMARCA4/SOS1/STAT3/TBC1D20/TGFB1/TGFB2/THY1/TRAF3IP1/ZEB1	53
GO:0043010	camera-type eye development	47/1842	295/17913	0.00159452	0.01142	0.00785906	ALDH1A3/ARHGAP35/ATP2B4/CACNA1C/CDKN1C/COL4A1/COL8A1/CRYAB/CTNNB1/CYP1B1/FAT1/FBN1/GJA1/GLI3/GPD2/HIPK1/HIPK2/IFT140/JUN/KDM5B/KLF4/LIMK2/LRP5/MAN2A1/MEIS1/MFN2/MITF/MYOM1/OPA1/PDGFRA/PDGFRB/PROM1/PROX1/RDH10/SERPINF1/SKI/SKIL/SLC4A5/SMAD3/SMARCA4/SOS1/TBC1D20/TGFB1/TGFB2/THY1/TRAF3IP1/ZEB1	47
GO:1903037	regulation of leukocyte cell-cell adhesion	47/1842	295/17913	0.00159452	0.01142	0.00785906	AIF1/AKT1/BCL6/CASP3/CCL2/CD209/CD44/CEBPB/CORO1A/CYLD/DLG5/FYN/GLI3/GPNMB/HAVCR2/HLA-DPB1/IGF1/IL6/ITGB2/KLF4/LEP/LGALS3/LRRC32/LYN/MAP3K8/MIR221/NCK2/NFKBIZ/NR4A3/NRARP/PDCD1/PDE5A/PIK3CA/PIK3R6/PRKCQ/PTPN11/RELA/RHOA/SOCS1/STAT5B/TFRC/TGFB1/THY1/VSIG4/XBP1/ZC3H12A/ZMIZ1	47
GO:0060828	regulation of canonical Wnt signaling pathway	43/1842	264/17913	0.00159506	0.01142	0.00785906	APOE/CCAR2/CTHRC1/CTNNB1/CYLD/DAAM2/DAPK3/DDIT3/DVL3/EGF/EGR1/FOXO1/FRZB/GLI3/GNAQ/GSK3B/IGFBP1/IGFBP4/KLHL12/LRRK1/MIR1-1/NKD2/NKX2-5/NRARP/PRICKLE1/PSMA3/PSMC2/RAPGEF1/RBMS3/RECK/RNF146/SFRP1/SFRP4/SMAD3/SMURF2/SOX4/SOX7/SULF2/UBR5/USP34/WNK2/WWTR1/YAP1	43
GO:0042116	macrophage activation	20/1842	96/17913	0.00160182	0.0114546	0.00788286	AIF1/APP/CD93/CRTC3/CTSC/EDN2/HAVCR2/IL1RL1/IL6/ITGB2/JUN/KARS/LDLR/NAMPT/SNCA/SUCNR1/THBS1/TYROBP/VSIG4/ZC3H12A	20
GO:0042133	neurotransmitter metabolic process	27/1842	145/17913	0.00165354	0.0117959	0.00811774	AGT/AGTR2/AIF1/AKT1/ALDH5A1/ATP2B4/ATP7A/CHDH/CLN3/CYP1B1/EDN1/GLA/ITGB2/JAK2/KLF2/KLF4/MAOB/NOS3/PHGDH/PKD2/RGN/SDSL/SHMT2/SIRPA/SLC44A1/SMAD3/ZC3H12A	27
GO:0072525	pyridine-containing compound biosynthetic process	27/1842	145/17913	0.00165354	0.0117959	0.00811774	ALDOA/ALDOC/BPGM/DDIT4/ENO1/ENO3/GALK1/GPI/HAAO/HDAC4/IDH2/IGF1/LDHA/NADK/NADK2/NAMPT/NNMT/NUP188/NUP214/NUPR1/PFKL/PFKM/PGAM2/POM121C/PRKAG2/STAT3/TP53	27
GO:0050849	negative regulation of calcium-mediated signaling	10/1842	34/17913	0.00167003	0.0118849	0.00817902	ATP2B4/CALM2/FHL2/GSK3B/ITPR1/MIR133A1/MIR133A2/MYOZ2/PKD2/PLEK	10
GO:2000249	regulation of actin cytoskeleton reorganization	10/1842	34/17913	0.00167003	0.0118849	0.00817902	ARHGDIA/ARHGDIB/DAPK3/FES/HCK/HCLS1/HRAS/NOTCH2/PDGFRA/TGFB1	10
GO:0046916	cellular transition metal ion homeostasis	18/1842	83/17913	0.00167265	0.0118892	0.00818198	ABCG2/APP/ATP13A2/ATP7A/FXN/HAMP/HEPH/HMOX2/MT2A/MYC/S100A8/S100A9/SCO1/SCO2/SLC30A1/SLC30A2/SLC30A3/TFRC	18
GO:0010675	regulation of cellular carbohydrate metabolic process	26/1842	138/17913	0.00167801	0.0119131	0.00819839	ACACB/AKT1/C1QTNF1/DDIT4/EP300/FOXO1/GSK3B/HDAC4/IGF1/IGFBP3/IGFBP4/IGFBP5/INPP5K/LEP/LEPR/MIDN/MLYCD/NUPR1/PDK4/PLEK/RGN/SNCA/SORBS1/STAT3/TP53/ZMPSTE24	26
GO:0035725	sodium ion transmembrane transport	22/1842	110/17913	0.00168166	0.0119247	0.0082064	ATP1A1/ATP1A2/ATP1A3/ATP1B1/ATP1B3/ATP2B4/CAV3/FGF12/GPD1L/HCN4/KLHL24/OSR1/PKD2/PTPN3/SCN10A/SCN2B/SCN5A/SLC8A1/SLMAP/TESC/WNK2/YWHAH	22
GO:0007033	vacuole organization	25/1842	131/17913	0.00169467	0.0119565	0.00822828	ANXA2/ATG13/ATG3/ATP13A2/BAG3/CLN3/CORO1A/GAA/HOOK1/HOOK3/LAPTM4B/LRSAM1/MAN2A1/MFN2/MTMR3/NAGPA/NUPR1/SMCR8/SMURF1/TMEM41B/UBQLN2/ULK1/VPS33A/WDR45B/WIPI1	25
GO:0071326	cellular response to monosaccharide stimulus	25/1842	131/17913	0.00169467	0.0119565	0.00822828	ANO1/CYBA/ENDOG/GATA4/HMGN3/LEP/MAP4K4/MPC2/NADK/NDUFAF2/NME1/NOX4/OPA1/OXCT1/PIK3CA/RAB11FIP5/RAF1/SERPINF1/SIDT2/SIN3A/SMARCA4/SOX4/UNC13B/VSNL1/XBP1	25
GO:0001771	immunological synapse formation	6/1842	14/17913	0.00169782	0.0119565	0.00822828	DOCK2/HAVCR2/LGALS3/MSN/NCK2/PRF1	6
GO:0032048	cardiolipin metabolic process	6/1842	14/17913	0.00169782	0.0119565	0.00822828	HADHB/LCLAT1/MECP2/PGS1/TAMM41/TAZ	6
GO:0061042	vascular wound healing	6/1842	14/17913	0.00169782	0.0119565	0.00822828	CXCR4/MCAM/MIR451A/SERPINE1/SMOC2/XBP1	6
GO:1903844	regulation of cellular response to transforming growth factor beta stimulus	23/1842	117/17913	0.00169827	0.0119565	0.00822828	CAV3/CDKN1C/CREBBP/EMILIN1/EP300/FBN1/GLG1/GOT1/HIPK2/HTRA1/LTBP4/MYOCD/RASL11B/SKI/SMAD3/SMURF1/SMURF2/TGFB1/TGFB3/TGFBR3/THBS1/TP53/ZEB1	23
GO:0048705	skeletal system morphogenesis	35/1842	204/17913	0.00170314	0.0119766	0.0082421	ALPL/ARID5B/CHSY1/COL27A1/COMP/CTNNB1/FGF18/FGR/GLG1/GLI3/HYAL2/IFT140/LRP5/MEF2C/MGP/MMP2/MSX1/OSR1/PDGFRA/PRKRA/PRRX1/RDH10/RUNX2/SERPINH1/SFRP1/SFRP4/SGPL1/SKI/SLC39A1/SMAD3/TGFB1/TGFB3/TIPARP/ZEB1/ZMPSTE24	35
GO:0035821	modification of morphology or physiology of other organism	29/1842	160/17913	0.00175149	0.012302	0.00846604	ANXA2/APOE/CALM2/CD209/CTSG/EP300/F2RL1/FMR1/GSDMD/HAMP/HIPK2/HMGN2/HSPA8/HYAL2/INPP5K/JUN/LYZ/MIR221/PRF1/S100A12/S100A9/SMAD3/SMARCA4/SP1/TBC1D20/TGFB1/TNIP1/ZC3H12A/ZNF639	29
GO:0046622	positive regulation of organ growth	15/1842	64/17913	0.00176186	0.0123602	0.00850606	ACACB/AKT1/BMP10/EDN1/GATA6/HAMP/HEY2/IGF1/MEF2C/MIR590/PIM1/PROX1/TBX5/TGFBR3/YAP1	15
GO:0032869	cellular response to insulin stimulus	34/1842	197/17913	0.00177523	0.0124392	0.00856044	AGT/AKT1/ATP6V0E2/CSRP3/CYFIP1/ERRFI1/FOXO1/FOXO4/GOT1/GRB10/GRB14/IGF1R/IGFBP1/INPP5K/LEP/OPA1/PDK4/PID1/PIK3CA/PRKCD/PRKCQ/PTPN1/PTPN11/PTPRA/PTPRE/RELA/RHOQ/SHC1/SOCS1/SORBS1/SOS1/SP1/XBP1/YWHAG	34
GO:0060411	cardiac septum morphogenesis	17/1842	77/17913	0.00181235	0.0126843	0.00872915	FZD2/GATA4/GATA6/HEY2/HEYL/MIR1-1/NKX2-5/NOS3/NOTCH2/PARVA/PROX1/SLIT2/SOX4/TBX5/TGFB2/TGFBR3/TP53	17
GO:0033574	response to testosterone	11/1842	40/17913	0.00181882	0.0127146	0.00874997	AR/CBL/DUSP1/EDN1/ELK1/MSN/NME1/PLN/RWDD1/SPP1/THBS1	11
GO:0002062	chondrocyte differentiation	20/1842	97/17913	0.00182676	0.012725	0.00875714	CHSY1/COL27A1/COMP/CREB3L2/CTNNB1/EIF2AK3/FGF18/GLG1/GLI3/LOXL2/MEF2C/MUSTN1/OSR1/RELA/RUNX2/SERPINH1/SMAD3/SULF1/SULF2/TGFB1	20
GO:0030038	contractile actin filament bundle assembly	20/1842	97/17913	0.00182676	0.012725	0.00875714	APOA1/ARAP1/INPP5K/ITGB5/MIR20A/NOX4/PHACTR1/PHLDB2/PPM1F/PXN/RHOA/S100A10/SFRP1/SMAD3/SORBS1/SYNPO2L/TGFB3/TPM1/WAS/ZYX	20
GO:0043149	stress fiber assembly	20/1842	97/17913	0.00182676	0.012725	0.00875714	APOA1/ARAP1/INPP5K/ITGB5/MIR20A/NOX4/PHACTR1/PHLDB2/PPM1F/PXN/RHOA/S100A10/SFRP1/SMAD3/SORBS1/SYNPO2L/TGFB3/TPM1/WAS/ZYX	20
GO:0048754	branching morphogenesis of an epithelial tube	27/1842	146/17913	0.00183432	0.0127449	0.00877081	AGT/AGTR2/AR/BCL2/CAV3/CCL11/COL4A1/CTNNB1/DCHS1/DDR1/DLG5/EDN1/EDNRA/EGF/ESR1/FAT4/GLI3/GZF1/KDM5B/KRAS/MYC/PKD2/RDH10/SLIT2/TGFB1/TNC/YAP1	27
GO:0032233	positive regulation of actin filament bundle assembly	14/1842	58/17913	0.00183801	0.0127449	0.00877081	APOA1/ID1/NOX4/PLEK/PPM1F/PXN/RHOA/S100A10/SFRP1/SMAD3/SWAP70/SYNPO2L/TGFB3/TPM1	14
GO:0046847	filopodium assembly	14/1842	58/17913	0.00183801	0.0127449	0.00877081	AGRN/ARAP1/DPYSL3/FGD2/FGD5/FMR1/FSCN1/PALM/PPP1R9B/PRKCD/RALA/RHOQ/SRGAP2C/TGFB3	14
GO:0006878	cellular copper ion homeostasis	5/1842	10/17913	0.00184898	0.0127449	0.00877081	APP/ATP7A/MT2A/SCO1/SCO2	5
GO:0014877	response to muscle inactivity involved in regulation of muscle adaptation	5/1842	10/17913	0.00184898	0.0127449	0.00877081	CASQ1/FBXO32/HDAC4/SCN5A/SGCA	5
GO:0014894	response to denervation involved in regulation of muscle adaptation	5/1842	10/17913	0.00184898	0.0127449	0.00877081	CASQ1/FBXO32/HDAC4/SCN5A/SGCA	5
GO:0046950	cellular ketone body metabolic process	5/1842	10/17913	0.00184898	0.0127449	0.00877081	ACAT1/ACSS3/BDH1/OXCT1/OXCT2	5
GO:1903789	regulation of amino acid transmembrane transport	5/1842	10/17913	0.00184898	0.0127449	0.00877081	AGT/ATP1A2/OSR1/RGS2/RGS4	5
GO:1903799	negative regulation of production of miRNAs involved in gene silencing by miRNA	5/1842	10/17913	0.00184898	0.0127449	0.00877081	ESR1/TGFB1/TP53/ZC3H12A/ZMPSTE24	5
GO:0071322	cellular response to carbohydrate stimulus	26/1842	139/17913	0.0018666	0.0128384	0.0088352	ANO1/CALCRL/CYBA/ENDOG/GATA4/HMGN3/LEP/MAP4K4/MPC2/NADK/NDUFAF2/NME1/NOX4/OPA1/OXCT1/PIK3CA/RAB11FIP5/RAF1/SERPINF1/SIDT2/SIN3A/SMARCA4/SOX4/UNC13B/VSNL1/XBP1	26
GO:0033006	regulation of mast cell activation involved in immune response	9/1842	29/17913	0.00186842	0.0128384	0.0088352	FCER1G/FES/FGR/GAB2/GATA2/LYN/NPPA/RAC2/VAMP8	9
GO:0023061	signal release	64/1842	433/17913	0.00186906	0.0128384	0.0088352	AGT/AGTR1/AGTR2/ANO1/ATP2A2/BACE1/BMP8A/BRSK1/C1QTNF1/CACNA1C/CACNB2/CAMK2A/DNM1L/DTNBP1/EDN1/FMR1/GJA1/GSK3B/HMGN3/HSPA8/IL6/ITPR1/ITPR3/JAK2/KALRN/KCNA5/KCNC4/KDM5B/LEP/LTBP4/LYN/MAP4K4/MEF2C/MIDN/MPC2/NAAA/NADK/NDUFAF2/NPPA/OXCT1/PFKL/PNKD/PPFIA4/PTPN11/RAB11FIP3/RAB11FIP5/RAB3A/RAF1/RETN/RHOT1/SFRP1/SIDT2/SLC16A1/SLC25A4/SLC2A1/SLC30A1/SNCA/SNCAIP/SOX4/SPP1/SYT11/UNC13B/VAMP8/VSNL1	64
GO:1901214	regulation of neuron death	49/1842	313/17913	0.0018737	0.0128553	0.00884683	AIFM1/AKT1/APOE/ATP13A2/AXL/BACE1/BCL2/BTG2/CASP3/CBL/CCL2/CEBPB/CLN3/CORO1A/CRLF1/CTNNB1/DDIT3/DDIT4/EGR1/ELK1/F2R/FBXW7/FOS/FYN/GPNMB/GSK3B/HDAC4/HIPK2/HRAS/ITGB2/JAK2/JUN/KRAS/MECP2/MEF2C/NR4A3/NUPR1/PICALM/PIK3CA/RHOA/SERPINF1/SNCA/STAT3/TGFB2/TGFB3/TP53/TP53BP2/TYROBP/UNC5B	49
GO:0051149	positive regulation of muscle cell differentiation	22/1842	111/17913	0.00189794	0.0130066	0.00895094	BCL2/BMP10/BOC/CAV3/CTNNB1/EDN1/EHD2/GDF15/HAMP/IGF1/MAML1/MAPK12/MEF2C/MIR1-1/MIR133A1/MIR133A2/MYLK3/MYOCD/PROX1/RBM24/SMYD1/TGFB1	22
GO:0035296	regulation of tube diameter	24/1842	125/17913	0.00190546	0.013028	0.00896566	ACE/ACE2/ADCY6/AGT/AGTR1/AGTR2/AKT1/APOE/ATP1A2/COMP/DOCK4/EDN1/EDN2/EDNRA/F2R/F2RL1/GJA1/KCNA5/LEP/NOS3/NPPB/RGS2/RHOA/SLC8A1	24
GO:0097746	regulation of blood vessel diameter	24/1842	125/17913	0.00190546	0.013028	0.00896566	ACE/ACE2/ADCY6/AGT/AGTR1/AGTR2/AKT1/APOE/ATP1A2/COMP/DOCK4/EDN1/EDN2/EDNRA/F2R/F2RL1/GJA1/KCNA5/LEP/NOS3/NPPB/RGS2/RHOA/SLC8A1	24
GO:0050804	modulation of chemical synaptic transmission	59/1842	393/17913	0.00191604	0.0130852	0.00900501	AGT/APOE/APP/ATAD1/ATP1A2/ATP2A2/BACE1/BRSK1/CACNB2/CAMK2A/CCL2/CDH11/CYFIP1/DBN1/DMPK/DNM1L/DTNBP1/EDN1/F2R/FAM107A/FMR1/FYN/GSK3B/HRAS/ITGB1/ITPR3/JAK2/KCNC4/KRAS/LAMA2/MAP1A/MAP1B/MECP2/MEF2C/MME/NLGN4X/NPTX2/PLK2/PNKD/PPP1R9B/PTPRA/RAB3A/RETN/RGS4/RHOT1/SERPINE2/SIPA1L1/SLC30A1/SNCA/SNCAIP/STAT3/SYNPO/SYT11/TPRG1L/TYROBP/UNC13B/USP46/YWHAG/YWHAH	59
GO:0090100	positive regulation of transmembrane receptor protein serine/threonine kinase signaling pathway	18/1842	84/17913	0.0019282	0.0131379	0.00904132	BMP10/CDKN1C/CREBBP/EP300/GATA4/GDF10/GOT1/HIPK2/MSX1/MYOCD/NUMA1/RBPMS/SULF1/TGFB1/TGFB3/TGFBR3/THBS1/ZNF423	18
GO:0090559	regulation of membrane permeability	18/1842	84/17913	0.0019282	0.0131379	0.00904132	ACAA2/BCL2/BNIP3/CAMK2A/CHCHD10/GSK3B/HEG1/LAPTM4B/MIR29A/RHOT1/SPG7/STAT3/THEM4/TP53/TP53BP2/YWHAG/YWHAH/YWHAQ	18
GO:0006022	aminoglycan metabolic process	29/1842	161/17913	0.00193115	0.0131429	0.00904474	ABCC5/AGRN/AKT1/B3GAT3/CD44/CHST3/CHST7/CHSY1/CHSY3/CSGALNACT2/EGF/EXT1/EXT2/FMOD/GCNT2/GLB1/GPC6/HSPG2/HYAL2/IDUA/ITIH5/LUM/LYVE1/OMD/PDGFRB/PIM1/PRELP/ST3GAL2/TGFB1	29
GO:0010544	negative regulation of platelet activation	7/1842	19/17913	0.00198448	0.0134441	0.00925201	APOE/C1QTNF1/CD9/NOS3/PDGFRA/PRKCD/SERPINE2	7
GO:0046597	negative regulation of viral entry into host cell	7/1842	19/17913	0.00198448	0.0134441	0.00925201	FCN1/FCN3/GSN/IFITM1/IFITM2/IFITM3/TRIM8	7
GO:0071294	cellular response to zinc ion	7/1842	19/17913	0.00198448	0.0134441	0.00925201	ATP13A2/MT1A/MT1E/MT1G/MT1M/MT1X/MT2A	7
GO:1903798	regulation of production of miRNAs involved in gene silencing by miRNA	7/1842	19/17913	0.00198448	0.0134441	0.00925201	ESR1/MAP2K1/MAP2K2/TGFB1/TP53/ZC3H12A/ZMPSTE24	7
GO:0007009	plasma membrane organization	19/1842	91/17913	0.00201578	0.0136405	0.00938719	AKT1/AR/ATP2A2/CAV3/CSRP3/CXCR4/EHD2/FAT4/GSN/MICALL1/MYH9/NDRG1/PRKCD/RAB3A/SH3GL2/SPTBN1/STX2/SYT11/TGFB2	19
GO:0008064	regulation of actin polymerization or depolymerization	27/1842	147/17913	0.00203181	0.0137284	0.00944768	ACTN2/ARHGAP35/ARPC1B/ARPC3/CCL11/CORO1A/CYFIP1/F2RL1/FCHSD2/FHOD3/GSN/HCK/HCLS1/IQGAP2/LMOD2/NCK2/PLEK/PLEKHG2/PLEKHH2/PRKCD/RHOA/SLIT2/SPTAN1/SPTBN1/SWAP70/TRIM27/WAS	27
GO:0099177	regulation of trans-synaptic signaling	59/1842	394/17913	0.00203341	0.0137284	0.00944768	AGT/APOE/APP/ATAD1/ATP1A2/ATP2A2/BACE1/BRSK1/CACNB2/CAMK2A/CCL2/CDH11/CYFIP1/DBN1/DMPK/DNM1L/DTNBP1/EDN1/F2R/FAM107A/FMR1/FYN/GSK3B/HRAS/ITGB1/ITPR3/JAK2/KCNC4/KRAS/LAMA2/MAP1A/MAP1B/MECP2/MEF2C/MME/NLGN4X/NPTX2/PLK2/PNKD/PPP1R9B/PTPRA/RAB3A/RETN/RGS4/RHOT1/SERPINE2/SIPA1L1/SLC30A1/SNCA/SNCAIP/STAT3/SYNPO/SYT11/TPRG1L/TYROBP/UNC13B/USP46/YWHAG/YWHAH	59
GO:1901615	organic hydroxy compound metabolic process	72/1842	500/17913	0.00203688	0.0137362	0.00945301	ACAA1/ACAA2/ACACB/ACADVL/ACOT8/ACOX2/ACSS2/ADH1A/AGTR2/AKR1C1/ALDH1A3/ALDH2/APOA1/APOE/APP/ASAH1/ATP7A/ATP8B1/BCL2/CEL/COQ2/COQ3/CYB5R3/CYP11B1/CYP11B2/CYP1B1/CYP4V2/DGAT1/DIO2/FASN/FDX1/GALK1/GOT1/GPD2/HSD17B4/IGF1/INPP1/INPP4B/INPP5K/IP6K1/ITGB2/LDLR/LEP/LEPR/MAOB/MECP2/MRS2/NAAA/NPC1/NUDT4/OSBPL2/PLCE1/PLEK/PLTP/PMVK/PNKD/PRKAG2/PROX1/RDH10/RDH5/SCD/SCP2/SGPP2/SMPD1/SNCA/SNCAIP/SP1/SPTLC2/TGFB…	72
GO:0150063	visual system development	53/1842	346/17913	0.00204378	0.013767	0.00947423	AGTPBP1/ALDH1A3/ARHGAP35/ATP2B4/BCL2/CACNA1C/CDKN1C/COL4A1/COL5A2/COL8A1/CRYAB/CTNNB1/CYP1B1/FAT1/FBN1/GJA1/GLI3/GPD2/HIPK1/HIPK2/IFT140/JUN/KDM5B/KLF4/LIMK2/LRP5/MAN2A1/MEIS1/MEIS2/MFN2/MITF/MYOM1/OPA1/PDGFRA/PDGFRB/PROM1/PROX1/RDH10/SCO2/SERPINF1/SKI/SKIL/SLC4A5/SMAD3/SMARCA4/SOS1/STAT3/TBC1D20/TGFB1/TGFB2/THY1/TRAF3IP1/ZEB1	53
GO:0032868	response to insulin	41/1842	252/17913	0.00206207	0.0138744	0.00954817	AGT/AKT1/ATP6V0E2/CSRP3/CYFIP1/EGR1/ERRFI1/FOXO1/FOXO4/GOT1/GRB10/GRB14/IGF1R/IGFBP1/INPP5K/LEP/LYN/NPPA/OPA1/PDK4/PID1/PIK3CA/PLN/PRKCD/PRKCQ/PTPN1/PTPN11/PTPRA/PTPRE/RELA/RETN/RHOQ/SHC1/SLC2A1/SOCS1/SORBS1/SORT1/SOS1/SP1/XBP1/YWHAG	41
GO:0001837	epithelial to mesenchymal transition	26/1842	140/17913	0.00207305	0.0139167	0.00957723	CTNNB1/CUL7/DLG5/EPHA3/GCNT2/GSK3B/HEY2/HEYL/IL6/KLHL12/LOXL2/MIR221/MIR590/MSX1/PHLDB1/PHLDB2/PPP2CA/RTN4/SFRP1/SMAD3/TBX5/TGFB1/TGFB2/TGFB3/TGFBR3/WWTR1	26
GO:1904064	positive regulation of cation transmembrane transport	26/1842	140/17913	0.00207305	0.0139167	0.00957723	ACTN2/AGT/ATP1B1/ATP1B3/CACNA2D1/CACNB2/CALM2/CASQ1/CCL2/CHCHD10/F2R/HSPA2/HTT/JPH2/KCNIP2/KCNJ2/MIR1-1/NPPA/PKD2/RGN/RNF207/RYR2/SNCA/TESC/THY1/WNK2	26
GO:0006801	superoxide metabolic process	15/1842	65/17913	0.00207664	0.0139176	0.00957786	AATF/AGT/ATP7A/CYBA/CYBB/EDN1/F2RL1/ITGB2/NOS3/NOX4/PRKCD/RGN/SH3PXD2A/TGFB1/TYROBP	15
GO:0050848	regulation of calcium-mediated signaling	20/1842	98/17913	0.00207788	0.0139176	0.00957786	ATP2B4/C10orf71/CALM2/CMKLR1/FHL2/GSK3B/HRC/HTT/IGF1/ITPR1/JPH2/LMCD1/MIR133A1/MIR133A2/MYOZ2/PDE4D/PKD2/PLEK/PLN/RGN	20
GO:1905954	positive regulation of lipid localization	17/1842	78/17913	0.00209972	0.014048	0.00966759	ACACB/ANXA2/APOA1/APOE/C1QTNF1/EDN1/FITM1/LIPG/NFKBIA/PLA2R1/PLIN5/PLTP/PRKCD/RETN/SCP2/SPP1/ZC3H12A	17
GO:0050880	regulation of blood vessel size	25/1842	133/17913	0.00210616	0.0140751	0.00968628	ACE/ACE2/ADCY6/AGT/AGTR1/AGTR2/AKT1/APOE/ATP1A2/COMP/DOCK4/EDN1/EDN2/EDNRA/F2R/F2RL1/GJA1/KCNA5/LEP/NOS3/NPPA/NPPB/RGS2/RHOA/SLC8A1	25
GO:0006939	smooth muscle contraction	21/1842	105/17913	0.00211745	0.0141187	0.00971629	AGT/ATP1A2/ATP2B4/CALCRL/CNN1/COMP/DAPK3/DOCK4/EDN1/EDN2/EDNRA/F2R/MYOCD/PDE4D/PLCE1/RGS2/RHOA/SLC8A1/SULF1/SULF2/TNNI3	21
GO:0055076	transition metal ion homeostasis	21/1842	105/17913	0.00211745	0.0141187	0.00971629	ABCG2/APP/ATP13A2/ATP7A/FXN/HAMP/HEPH/HMOX2/HYAL2/MT2A/MYC/PICALM/S100A8/S100A9/SCO1/SCO2/SLC30A1/SLC30A2/SLC30A3/STEAP2/TFRC	21
GO:0010831	positive regulation of myotube differentiation	10/1842	35/17913	0.00212558	0.0141449	0.0097343	BCL2/CAV3/EHD2/GDF15/MAML1/MIR1-1/MIR133A1/MIR133A2/RBM24/SMYD1	10
GO:0050863	regulation of T cell activation	48/1842	307/17913	0.00212616	0.0141449	0.0097343	AIF1/AKT1/BCL6/CASP3/CCL2/CD209/CEBPB/CORO1A/CTNNB1/CYLD/DLG5/FYN/GLI3/GPNMB/GSN/HAVCR2/HLA-DPB1/IGF1/IL6/LEP/LGALS3/LRRC32/LYN/MAP3K8/NCK2/NFKBIZ/NRARP/PAG1/PDCD1/PDE5A/PIK3CA/PIK3R6/PRKCQ/PTPN11/RAC2/RHOA/SH3RF1/SOCS1/SOS1/STAT5B/TFRC/TGFB1/THY1/VSIG4/XBP1/ZC3H12A/ZEB1/ZMIZ1	48
GO:0042098	T cell proliferation	31/1842	177/17913	0.00218103	0.0144775	0.00996316	AIF1/CASP3/CD209/CEBPB/CORO1A/CTNNB1/DLG5/DOCK2/FYN/GJA1/GPNMB/HAVCR2/HLA-DPB1/IGF1/IL6/LEP/LGALS3/LRRC32/MSN/NCK2/PDE5A/PIK3CG/PRKCQ/RAC2/SH3RF1/SOS1/STAT5B/TFRC/TGFB1/TP53/VSIG4	31
GO:0043112	receptor metabolic process	31/1842	177/17913	0.00218103	0.0144775	0.00996316	ACE2/ANKRD13A/ANXA2/APOE/ARAP1/ATAD1/CALCRL/CAPN1/CAV3/CD9/EDN1/EGF/FCER1G/FMR1/INPP5F/ITGB1/ITGB2/PICALM/PTPN1/RAMP1/SFRP4/SH3GL2/SMURF1/SNCA/SNX1/TBC1D16/TFRC/TGFB1/UBQLN2/USP46/VAMP3	31
GO:0010656	negative regulation of muscle cell apoptotic process	14/1842	59/17913	0.00218584	0.0144931	0.00997394	BAG3/EDN1/GATA4/HEY2/IGF1/JAK2/MIR133A1/MIR133A2/MIR20A/MIR590/MYOCD/NKX2-5/NUPR1/ZC3H12A	14
GO:1903901	negative regulation of viral life cycle	18/1842	85/17913	0.00221582	0.0146591	0.0100881	BST2/FCN1/FCN3/GSN/IFI16/IFIT1/IFITM1/IFITM2/IFITM3/INPP5K/ISG20/MIR221/PROX1/TNIP1/TRIM27/TRIM35/TRIM8/ZC3H12A	18
GO:1904063	negative regulation of cation transmembrane transport	18/1842	85/17913	0.00221582	0.0146591	0.0100881	ACTN2/ATP1A2/ATP7A/CALM2/CAV3/FGF12/FMR1/KCNAB1/MIR1-1/MIR133A1/MIR133A2/OSR1/PKD2/PLN/RGS2/RGS4/SLC30A1/TGFB1	18
GO:0030832	regulation of actin filament length	27/1842	148/17913	0.00224723	0.0148503	0.0102197	ACTN2/ARHGAP35/ARPC1B/ARPC3/CCL11/CORO1A/CYFIP1/F2RL1/FCHSD2/FHOD3/GSN/HCK/HCLS1/IQGAP2/LMOD2/NCK2/PLEK/PLEKHG2/PLEKHH2/PRKCD/RHOA/SLIT2/SPTAN1/SPTBN1/SWAP70/TRIM27/WAS	27
GO:0010664	negative regulation of striated muscle cell apoptotic process	11/1842	41/17913	0.0022583	0.0149068	0.0102586	BAG3/GATA4/HEY2/JAK2/MIR133A1/MIR133A2/MIR20A/MIR590/MYOCD/NKX2-5/NUPR1	11
GO:0038066	p38MAPK cascade	13/1842	53/17913	0.0022644	0.0149138	0.0102634	CAV3/CYLD/DUSP1/GADD45A/GADD45B/GADD45G/KARS/LEP/MAP3K3/MIR20A/SASH1/ZC3H12A/ZFP36	13
GO:0050819	negative regulation of coagulation	13/1842	53/17913	0.0022644	0.0149138	0.0102634	APOE/C1QTNF1/CD9/EDN1/FAP/NOS3/PDGFRA/PLAU/PRKCD/PROS1/SERPINE1/SERPINE2/THBS1	13
GO:1990266	neutrophil migration	16/1842	72/17913	0.00227143	0.0149435	0.0102839	CXADR/EDN1/EDN2/ITGA9/ITGB2/LGALS3/PDE4D/PECAM1/PIK3CG/RAC2/S100A12/S100A8/S100A9/SLIT2/TGFB2/THBS4	16
GO:0007584	response to nutrient	36/1842	215/17913	0.00227468	0.0149482	0.0102871	ACSL3/AGL/AIFM1/ALPL/APOA1/BCL11A/CCND1/CYBA/CYBB/FES/FYN/GATA4/GNPAT/GSN/HAMP/KANK2/LEP/LIPG/MAP1B/MTHFR/NNT/OPA1/OXCT1/PENK/PIM1/POSTN/RELA/SFRP1/SLC16A1/SLC8A1/SPARC/SPP1/TGFB1/TNC/TNFRSF11B/XBP1	36
GO:0016052	carbohydrate catabolic process	32/1842	185/17913	0.00229461	0.015002	0.0103241	ABHD10/AGL/ALDOA/ALDOC/BPGM/CTBS/DDIT4/ENO1/ENO3/GAA/GALK1/GLB1/GPD2/GPI/HDAC4/IGF1/LDHA/LRP5/NEU3/NUP188/NUP214/NUPR1/PFKL/PFKM/PGAM2/PHKA2/POM121C/PRKAG2/PYGB/STAT3/TKTL1/TP53	32
GO:0031113	regulation of microtubule polymerization	12/1842	47/17913	0.00229573	0.015002	0.0103241	CAMSAP2/CAV3/CLIP3/DCTN1/FES/FKBP4/MAP1B/MAP2/MECP2/NAV3/NUMA1/SNCA	12
GO:0042059	negative regulation of epidermal growth factor receptor signaling pathway	12/1842	47/17913	0.00229573	0.015002	0.0103241	CBL/EGF/ERRFI1/HBEGF/HGS/MIR133A1/MIR133A2/PTPN3/RNF115/SH3GL2/SH3KBP1/STAM	12
GO:0045912	negative regulation of carbohydrate metabolic process	12/1842	47/17913	0.00229573	0.015002	0.0103241	DDIT4/EP300/GSK3B/HDAC4/INPP5K/LEPR/MIDN/NUPR1/PLEK/STAT3/TGFB1/TP53	12
GO:1900744	regulation of p38MAPK cascade	12/1842	47/17913	0.00229573	0.015002	0.0103241	CAV3/CYLD/DUSP1/GADD45A/GADD45B/GADD45G/KARS/LEP/MAP3K3/MIR20A/SASH1/ZC3H12A	12
GO:0045807	positive regulation of endocytosis	26/1842	141/17913	0.0022987	0.015002	0.0103241	ANXA2/APOA1/APOE/ATAD1/AXL/BICD1/CAV3/CBL/CCL2/CD14/CLIP3/CYBA/DNM1L/DOCK2/EGF/F2RL1/FMR1/GATA2/HIP1/MFGE8/MIR20A/RAPGEF1/SERPINE1/SFRP4/SGIP1/SNCA	26
GO:0045638	negative regulation of myeloid cell differentiation	19/1842	92/17913	0.00230059	0.015002	0.0103241	C1QC/CTNNB1/FBN1/FBXW7/GATA2/LDB1/LYN/MAFB/MEIS1/MEIS2/MYC/NFKBIA/NME1/PIAS3/SFRP1/STAT5B/TMEM178A/TRIB1/ZFP36	19
GO:0035150	regulation of tube size	25/1842	134/17913	0.00234201	0.0152553	0.0104984	ACE/ACE2/ADCY6/AGT/AGTR1/AGTR2/AKT1/APOE/ATP1A2/COMP/DOCK4/EDN1/EDN2/EDNRA/F2R/F2RL1/GJA1/KCNA5/LEP/NOS3/NPPA/NPPB/RGS2/RHOA/SLC8A1	25
GO:0005976	polysaccharide metabolic process	20/1842	99/17913	0.00235754	0.0153396	0.0105565	AGL/AKT1/CHST7/CSGALNACT2/EGF/EXT1/EXT2/GAA/GSK3B/IGF1/INPP5K/LEPR/PCDH12/PHKA2/PPP1R1A/PPP1R3C/PRKAG2/PYGB/SORBS1/TGFB1	20
GO:0046425	regulation of JAK-STAT cascade	23/1842	120/17913	0.00239606	0.0155731	0.0107171	AGT/BCL3/CRLF1/CYP1B1/EGF/F2R/FYN/HCLS1/HGS/IGF1/IL6/INPP5F/JAK2/LEP/LYN/MIR221/PECAM1/PPP2CA/SOCS1/SOCS2/STAT3/TNFRSF1A/TSLP	23
GO:0051817	modification of morphology or physiology of other organism involved in symbiotic interaction	22/1842	113/17913	0.00240201	0.0155946	0.010732	ANXA2/APOE/CALM2/CD209/CTSG/EP300/F2RL1/FMR1/HIPK2/HSPA8/HYAL2/INPP5K/JUN/MIR221/SMAD3/SMARCA4/SP1/TBC1D20/TGFB1/TNIP1/ZC3H12A/ZNF639	22
GO:0061333	renal tubule morphogenesis	17/1842	79/17913	0.00242426	0.0157046	0.0108077	AGT/AGTR2/BCL2/COL4A1/CTNNB1/DCHS1/FAT4/GLI3/GZF1/IRX2/IRX3/KLHL3/MEF2C/MYC/OSR1/PKD2/TGFB1	17
GO:0097756	negative regulation of blood vessel diameter	17/1842	79/17913	0.00242426	0.0157046	0.0108077	ACE/ACE2/AGT/AGTR1/AKT1/ATP1A2/COMP/DOCK4/EDN1/EDN2/EDNRA/F2R/GJA1/KCNA5/LEP/RHOA/SLC8A1	17
GO:0051491	positive regulation of filopodium assembly	9/1842	30/17913	0.00242883	0.0157171	0.0108162	AGRN/ARAP1/DPYSL3/FMR1/FSCN1/PALM/RALA/RHOQ/TGFB3	9
GO:0051926	negative regulation of calcium ion transport	15/1842	66/17913	0.00243677	0.015734	0.0108279	ATP1A2/BCL2/CALM2/CAV3/FMR1/INPP5K/MIR1-1/MIR133A1/MIR133A2/NOS3/PKD2/PLN/SLC30A1/TGFB1/TRIM27	15
GO:1900076	regulation of cellular response to insulin stimulus	15/1842	66/17913	0.00243677	0.015734	0.0108279	AGT/GRB10/GRB14/INPP5K/LEP/OPA1/PID1/PRKCD/PRKCQ/PTPN1/PTPN11/PTPRE/RELA/SOCS1/SORBS1	15
GO:0070661	leukocyte proliferation	43/1842	270/17913	0.00247417	0.0159581	0.0109821	ACE/AIF1/BCL2/BCL6/BST2/CASP3/CD209/CDKN1A/CEBPB/CORO1A/CTNNB1/DLG5/DOCK2/F2RL1/FYN/GJA1/GPNMB/HAVCR2/HLA-DPB1/IGF1/IL6/LEP/LGALS3/LRRC32/LYN/MEF2C/MSN/NCK2/NPR3/PDE5A/PIK3CG/PRKCD/PRKCQ/RAC2/SH3RF1/SLC39A10/SOS1/STAT5B/TFRC/TGFB1/TP53/TYROBP/VSIG4	43
GO:0007611	learning or memory	40/1842	247/17913	0.00252732	0.0162832	0.0112058	ADCY3/AGT/APOE/APP/ATAD1/ATP1A2/ATXN1L/BRSK1/BTG2/CASP3/CEBPB/CIC/CLN3/DEAF1/EP300/FOS/FYN/GATM/HTT/ITGA5/ITGB1/ITPR3/JUN/KALRN/KCNAB1/KRAS/LDLR/MAP1A/MECP2/MEF2C/MEIS2/MME/NLGN4X/NPTX2/PICALM/PLK2/SERPINF1/SYNPO/VDAC1/VDAC3	40
GO:0006839	mitochondrial transport	37/1842	224/17913	0.00253989	0.0163464	0.0112493	ACAA2/ACACB/AGK/ATG13/BAG3/BCL2/BNIP3/CAMK2A/CHCHD10/CPT1B/DNAJC19/FBXW7/GSK3B/MFF/MFN2/MICU2/MIR29A/MRS2/MTX2/OPA1/PDCD5/PRKAG2/RAC2/RHOT1/SAE1/SLC25A20/SPG7/STAT3/THEM4/TIMM21/TOMM40/TP53/TP53BP2/TST/YWHAG/YWHAH/YWHAQ	37
GO:0007612	learning	26/1842	142/17913	0.00254495	0.0163612	0.0112595	ADCY3/AGT/APP/ATAD1/ATP1A2/ATXN1L/BRSK1/BTG2/CIC/CLN3/DEAF1/FOS/FYN/HTT/ITGB1/JUN/KALRN/KRAS/MAP1A/MECP2/MEIS2/NLGN4X/NPTX2/SYNPO/VDAC1/VDAC3	26
GO:0010632	regulation of epithelial cell migration	46/1842	294/17913	0.00255982	0.016439	0.011313	ADAMTS9/AGT/AGTR2/AKT1/AMOTL1/APOE/BMP10/DOCK1/EDN1/FBXW7/FGF18/FGF7/GATA2/GPI/HBEGF/JUN/KLF4/MAP2K5/MAP3K3/MAP4K4/MAPRE2/MECP2/MEF2C/MIR20A/MIR221/MIR29A/MMRN2/NOS3/PLK2/PPM1F/PROX1/PTPRR/RHOA/RTN4/SASH1/SERPINF1/SLIT2/SMOC2/SP1/SPARC/STARD13/TGFB1/TGFB2/THBS1/VASH1/ZC3H12A	46
GO:0007512	adult heart development	6/1842	15/17913	0.00258517	0.0165373	0.0113807	BMP10/GJA1/MYH6/MYH7/NKX2-5/TCAP	6
GO:1900119	positive regulation of execution phase of apoptosis	6/1842	15/17913	0.00258517	0.0165373	0.0113807	ENDOG/FAP/IL6/TP53/TP53BP2/ZC3H12A	6
GO:1902001	fatty acid transmembrane transport	6/1842	15/17913	0.00258517	0.0165373	0.0113807	ACACB/AKT1/CPT1B/PRKAG2/SLC25A20/THBS1	6
GO:0010659	cardiac muscle cell apoptotic process	14/1842	60/17913	0.0025863	0.0165373	0.0113807	AGT/BNIP3/CAMK2A/GATA4/HEY2/JAK2/MIR133A1/MIR133A2/MIR20A/MIR590/MYOCD/NKX2-5/NUPR1/TP53	14
GO:0010977	negative regulation of neuron projection development	25/1842	135/17913	0.00259995	0.0166066	0.0114284	ADCY6/APOE/ARHGDIA/BAG5/BCL11A/DPYSL3/FKBP4/ID1/INPP5F/MAP2/MAP4K4/PLK2/PTPN9/RAP1GAP2/RGMA/RHOA/RTN4/SLIT2/SPOCK1/SPP1/SRGAP2C/THY1/TRAK2/ULK2/YWHAH	25
GO:0016051	carbohydrate biosynthetic process	33/1842	194/17913	0.00261379	0.016677	0.0114769	AGL/AKT1/ALDOA/ALDOC/ATF3/CSGALNACT2/EGF/ENO1/ENO3/EP300/EXT1/EXT2/FOXO1/GOT1/GPD2/GPI/GSK3B/IGF1/INPP5K/LEP/LEPR/MDH1/MDH2/PGAM2/PLEK/PPP1R3C/SLC2A1/SNCA/SORBS1/ST3GAL2/ST6GALNAC6/TGFB1/TKT	33
GO:0051591	response to cAMP	19/1842	93/17913	0.00261845	0.0166888	0.0114849	APP/AQP9/BSG/DUSP1/FDX1/FOS/FOSB/HCN4/IGFBP5/INPP5K/NME1/NOX4/PENK/PIK3CG/PKD2/RAPGEF1/RELA/SLC8A1/SPARC	19
GO:0051494	negative regulation of cytoskeleton organization	24/1842	128/17913	0.00264477	0.0168203	0.0115755	ARAP1/ARHGEF2/CAV3/CLIP3/CORO1A/FHOD3/FKBP4/GSN/INPP5K/LMOD2/MAP1B/MAP2/MIR20A/NAV3/PHLDB2/PLEKHH2/PRKCD/SLIT2/SNCA/SPTAN1/SPTBN1/SWAP70/TMEM67/WAS	24
GO:0071333	cellular response to glucose stimulus	24/1842	128/17913	0.00264477	0.0168203	0.0115755	ANO1/CYBA/ENDOG/GATA4/HMGN3/MAP4K4/MPC2/NADK/NDUFAF2/NME1/NOX4/OPA1/OXCT1/PIK3CA/RAB11FIP5/RAF1/SERPINF1/SIDT2/SIN3A/SMARCA4/SOX4/UNC13B/VSNL1/XBP1	24
GO:0097530	granulocyte migration	20/1842	100/17913	0.00266823	0.016949	0.011664	CCL11/CMKLR1/CXADR/EDN1/EDN2/ITGA9/ITGB2/KARS/LGALS3/PDE4D/PECAM1/PIK3CG/RAC2/S100A12/S100A8/S100A9/SLIT2/TGFB2/THBS1/THBS4	20
GO:0048009	insulin-like growth factor receptor signaling pathway	10/1842	36/17913	0.00267597	0.016949	0.011664	AKT1/AR/CRIM1/EIF2AK3/IGF1/IGF1R/IGFBP3/IGFBP4/IGFBP5/MIR1-1	10
GO:0086091	regulation of heart rate by cardiac conduction	10/1842	36/17913	0.00267597	0.016949	0.011664	CACNA1C/CACNA2D1/CACNB2/CTNNA3/DSP/HCN4/KCNA5/KCNJ2/SCN2B/SCN5A	10
GO:0014829	vascular smooth muscle contraction	8/1842	25/17913	0.00267932	0.016949	0.011664	AGT/COMP/DOCK4/EDN1/EDN2/EDNRA/RHOA/SLC8A1	8
GO:0045932	negative regulation of muscle contraction	8/1842	25/17913	0.00267932	0.016949	0.011664	ATP1A2/CALCRL/DOCK4/PDE5A/PIK3CG/RGS2/TNNT1/ZC3H12A	8
GO:0006024	glycosaminoglycan biosynthetic process	21/1842	107/17913	0.00269204	0.0170113	0.0117069	ABCC5/AGRN/B3GAT3/CHST3/CHST7/CHSY1/CHSY3/CSGALNACT2/EGF/EXT1/EXT2/FMOD/GCNT2/GPC6/HSPG2/LUM/OMD/PDGFRB/PRELP/ST3GAL2/TGFB1	21
GO:0051656	establishment of organelle localization	65/1842	448/17913	0.00272746	0.0172167	0.0118483	AP3M2/ARHGEF2/ATP2A2/BACE1/BICD1/BOD1/CACNB2/CAMK2A/CBL/CD59/CENPA/CLN3/COL7A1/CTNNB1/CTSC/DCTN1/DNM1L/DTNBP1/F8/FCER1G/FES/FGR/FMR1/FYCO1/GAB2/GATA2/GOLGA2/GOSR2/GSK3B/HOOK3/HTT/KIF13A/KIF3B/KIF3C/KLHL12/LYN/MAP1B/MAP2/MAP4/MLH1/MYH9/NDC80/NDE1/NPPA/NR4A3/NUMA1/OPA1/PIK3CG/RAB3A/RAC2/RHOT1/S100A13/SAR1B/SEC16A/SEC31A/SNCA/TBC1D20/TMED9/TRAK2/TRAPPC12/UCHL1/UNC13B/VAMP8/WIPI1/YKT6	65
GO:0097696	STAT cascade	27/1842	150/17913	0.00273703	0.0172588	0.0118772	AGT/BCL3/CCL2/CRLF1/CYP1B1/EGF/F2R/FYN/HCLS1/HGS/IGF1/IL6/INPP5F/JAK2/LEP/LYN/MIR221/PECAM1/PKD2/PPP2CA/PTPN1/SOCS1/SOCS2/STAT3/STAT5B/TNFRSF1A/TSLP	27
GO:0045933	positive regulation of muscle contraction	12/1842	48/17913	0.00277952	0.0173382	0.0119319	ACE2/ATP1A1/EDN1/EDN2/ENO1/F2R/MIR1-1/MYOCD/NPPA/RGS2/RHOA/RNF207	12
GO:0035307	positive regulation of protein dephosphorylation	11/1842	42/17913	0.00277999	0.0173382	0.0119319	AGTR2/CALM2/CDCA2/DUSP26/JAK2/PDGFRB/PPP2R5A/PRKCD/SLC39A10/SMPD1/TGFB1	11
GO:0045429	positive regulation of nitric oxide biosynthetic process	11/1842	42/17913	0.00277999	0.0173382	0.0119319	AGT/AGTR2/AIF1/AKT1/EDN1/ITGB2/JAK2/KLF2/KLF4/PKD2/SMAD3	11
GO:0051489	regulation of filopodium assembly	11/1842	42/17913	0.00277999	0.0173382	0.0119319	AGRN/ARAP1/DPYSL3/FMR1/FSCN1/PALM/PRKCD/RALA/RHOQ/SRGAP2C/TGFB3	11
GO:0009081	branched-chain amino acid metabolic process	7/1842	20/17913	0.00278477	0.0173382	0.0119319	ACAT1/BCAT2/BCKDHB/DLD/HIBADH/HSD17B10/MCCC2	7
GO:0009083	branched-chain amino acid catabolic process	7/1842	20/17913	0.00278477	0.0173382	0.0119319	ACAT1/BCAT2/BCKDHB/DLD/HIBADH/HSD17B10/MCCC2	7
GO:0010002	cardioblast differentiation	7/1842	20/17913	0.00278477	0.0173382	0.0119319	GATA4/GATA6/MYOCD/NKX2-5/PRICKLE1/TBX5/TGFB2	7
GO:0030220	platelet formation	7/1842	20/17913	0.00278477	0.0173382	0.0119319	ACTN1/CASP3/EP300/MEF2C/MYH9/PTPN11/VPS33A	7
GO:0086014	atrial cardiac muscle cell action potential	7/1842	20/17913	0.00278477	0.0173382	0.0119319	CACNA1C/CACNB2/GJA1/KCNA5/RNF207/RYR2/SCN5A	7
GO:0086026	atrial cardiac muscle cell to AV node cell signaling	7/1842	20/17913	0.00278477	0.0173382	0.0119319	CACNA1C/CACNB2/GJA1/KCNA5/RNF207/RYR2/SCN5A	7
GO:0086066	atrial cardiac muscle cell to AV node cell communication	7/1842	20/17913	0.00278477	0.0173382	0.0119319	CACNA1C/CACNB2/GJA1/KCNA5/RNF207/RYR2/SCN5A	7
GO:2000738	positive regulation of stem cell differentiation	7/1842	20/17913	0.00278477	0.0173382	0.0119319	GATA4/GATA6/LTBP3/NKX2-5/RBM24/TBX5/TGFB2	7
GO:0048880	sensory system development	53/1842	351/17913	0.00278932	0.0173483	0.0119388	AGTPBP1/ALDH1A3/ARHGAP35/ATP2B4/BCL2/CACNA1C/CDKN1C/COL4A1/COL5A2/COL8A1/CRYAB/CTNNB1/CYP1B1/FAT1/FBN1/GJA1/GLI3/GPD2/HIPK1/HIPK2/IFT140/JUN/KDM5B/KLF4/LIMK2/LRP5/MAN2A1/MEIS1/MEIS2/MFN2/MITF/MYOM1/OPA1/PDGFRA/PDGFRB/PROM1/PROX1/RDH10/SCO2/SERPINF1/SKI/SKIL/SLC4A5/SMAD3/SMARCA4/SOS1/STAT3/TBC1D20/TGFB1/TGFB2/THY1/TRAF3IP1/ZEB1	53
GO:1902806	regulation of cell cycle G1/S phase transition	33/1842	195/17913	0.00284326	0.0176652	0.0121569	AIF1/AKT1/ATP2B4/BCL2/BTG2/CCL2/CCND1/CCND2/CDKN1A/CTDSP2/DCUN1D3/EP300/FAM107A/FBXW7/FHL1/GADD45A/GPNMB/KANK2/KCNA5/KLF4/LSM10/MIR133A1/MIR133A2/MIR221/MIR29A/MIR451A/MIR590/PKD2/PLK2/SOX4/SUSD2/TP53/WEE1	33
GO:0016236	macroautophagy	43/1842	272/17913	0.00284834	0.0176782	0.0121659	AKT1/ATG13/ATG3/ATP13A2/ATP6V0E2/BAG3/BNIP3/CALCOCO2/CAPN1/CASP3/CLN3/FYCO1/HGS/HTT/KLHL3/LAMP2/LRSAM1/MFN1/MFN2/MTMR3/NPC1/NUPR1/PIK3CA/PRKAG2/SCOC/SMCR8/SMURF1/SPTLC2/STAM/SUPT5H/TMEM41B/TMEM74/TOMM40/TP53/UBQLN2/UCHL1/ULK1/VAMP8/VDAC1/VPS33A/WDFY3/WDR45B/WIPI1	43
GO:0043900	regulation of multi-organism process	60/1842	408/17913	0.00285743	0.017716	0.0121919	ANXA2/APOE/ARHGDIB/BCL2/BIRC3/BST2/CTSG/CXCR4/CYBA/EP300/F2RL1/FCN1/FCN3/FMR1/GSN/HAVCR2/HDAC4/HSPA8/HTRA1/IFI16/IFIT1/IFITM1/IFITM2/IFITM3/IGF1/INPP5K/ISG20/JUN/LHFPL2/LRSAM1/LY96/MDFIC/MIR221/PDE5A/POLR2A/PPID/PRF1/PROX1/SASH1/SIN3A/SMARCA4/SMURF2/SP1/SUPT5H/SYT11/TBC1D20/TIMP1/TNIP1/TRAF3IP1/TRIB1/TRIM27/TRIM35/TRIM44/TRIM8/TSPAN32/UNC13B/ZC3H12A/ZFP36/ZMPSTE24/ZNF639	60
GO:0097237	cellular response to toxic substance	39/1842	241/17913	0.00287462	0.017804	0.0122524	ABCG2/ABTB2/ACTB/AIFM1/ALOX5AP/APOE/ATP7A/AXL/BNIP3/CYBB/CYP1B1/EGR1/ENDOG/FOXO1/FXN/GPX8/IL6/IMPACT/KDM3B/KDM6B/KLF2/KLF4/MGST1/MIR133A1/MIR133A2/MSX1/NNT/NOS3/NR4A3/PRDX6/PRKCD/PXDN/PXDNL/RELA/RGN/S100A9/SIRPA/TXNRD1/ZC3H12A	39
GO:0009408	response to heat	28/1842	158/17913	0.00291752	0.0180508	0.0124223	AKT1/ANO1/ATP2A2/BAG1/BAG3/BAG5/CAMK2A/CASQ1/CCAR2/CD14/CDKN1A/CREBBP/CRYAB/EIF2B3/EP300/FKBP4/GSK3B/HSPA2/HSPA6/HSPA8/IGF1/IGFBP7/LYN/NOS3/NUP188/NUP214/POM121C/THBS1	28
GO:0051588	regulation of neurotransmitter transport	24/1842	129/17913	0.00293979	0.0181696	0.012504	ATP1A2/ATP2A2/BACE1/CACNB2/CAMK2A/DNM1L/DTNBP1/FMR1/GSK3B/KCNC4/MAOB/MEF2C/NPPA/PNKD/RAB3A/RGS2/RGS4/RHOT1/SLC30A1/SNCA/SNCAIP/SYT11/UNC13B/VAMP8	24
GO:0051098	regulation of binding	55/1842	368/17913	0.00294511	0.0181835	0.0125136	ACE/ACTB/AKT1/ANXA2/APOE/APP/BCL2/BCL3/CALM2/CTHRC1/CTNNB1/CYLD/DDIT3/DTNBP1/EGF/EIF3D/EP300/FBXW7/FMR1/GOLGA2/GSK3B/HDAC4/HEY2/HIPK2/HMGB2/ID1/IFI16/IFIT1/IFIT2/IGF1/JAK2/JUN/KLF4/LGALS3/MAP2/MARK3/MED25/MEF2C/MSX1/MYOCD/NFKBIA/NME1/NSD1/PLK2/PLN/PPP2CA/PRKCD/S100A10/SIN3A/SKI/SMAD3/TGFB1/TGFBR3/XIRP1/ZMPSTE24	55
GO:0043687	post-translational protein modification	54/1842	360/17913	0.00295586	0.0182309	0.0125462	AGTPBP1/APOA1/APOE/APP/ASB1/ASB15/ASB18/ASB8/CALU/CHGB/CKAP4/COPS3/COPS5/CUL7/DCAF7/DCUN1D3/FBN1/FBXL19/FBXL4/FBXO32/FBXO9/FBXW11/FBXW2/FBXW4/FBXW7/FEM1A/FEM1B/FN1/HRC/IGFBP1/IGFBP3/IGFBP4/IGFBP5/IGFBP7/IL6/KCTD7/KLHL2/KLHL3/LAMB1/LRRC41/MFGE8/PENK/PSMA3/PSMC2/RAB3A/RHBDD1/SOCS2/SPP1/SPSB1/SUMF1/TGOLN2/TIMP1/TNC/TULP4	54
GO:0032231	regulation of actin filament bundle assembly	19/1842	94/17913	0.00297228	0.0182561	0.0125636	APOA1/ARAP1/ID1/INPP5K/MIR20A/NOX4/PHLDB2/PLEK/PPM1F/PXN/RHOA/S100A10/SFRP1/SMAD3/SWAP70/SYNPO2L/TGFB3/TPM1/WAS	19
GO:0045778	positive regulation of ossification	19/1842	94/17913	0.00297228	0.0182561	0.0125636	CEBPB/CEBPD/CLIC1/CTHRC1/CTNNB1/GJA1/GLI3/IFITM1/IGF1/IL6/LRP5/MEF2C/OSR1/RUNX2/SLC8A1/SMAD3/TGFB1/TGFB2/TGFB3	19
GO:0048284	organelle fusion	19/1842	94/17913	0.00297228	0.0182561	0.0125636	ANXA2/BNIP3/CORO1A/DNM1L/MFF/MFN1/MFN2/NKD2/OMA1/OPA1/PID1/PLD6/RAB3A/SNCA/STX6/STXBP6/TAP1/VAMP3/VPS41	19
GO:0060191	regulation of lipase activity	19/1842	94/17913	0.00297228	0.0182561	0.0125636	AGT/AGTR1/APOA1/ARL1/BICD1/EDNRA/ESR1/GNA15/GNAQ/HRAS/MIR590/PDGFRA/PDGFRB/PLA2R1/PLIN5/RGS2/RHOA/SNCA/SORT1	19
GO:0051091	positive regulation of DNA-binding transcription factor activity	41/1842	257/17913	0.00297619	0.0182612	0.012567	AGT/AKT1/APP/AR/ARHGEF2/ARID5B/BEX1/BUD31/CAMK2A/COPS5/CTNNB1/DDIT3/EDN1/EP300/ERC1/ESR1/FZD2/HCLS1/HDAC4/HIPK2/IL18R1/IL6/IRAK3/ITGB2/JAK2/KRAS/MYOCD/PRKCH/PRKCQ/RELA/ROR1/RWDD1/S100A12/S100A8/S100A9/SMAD3/SMARCA4/STAT3/TGFB1/TRIM27/TRIM8	41
GO:0055067	monovalent inorganic cation homeostasis	23/1842	122/17913	0.00298521	0.0182975	0.0125921	AGT/AGTR1/AGTR2/ATP1A1/ATP1A2/ATP1A3/ATP1B1/ATP1B3/ATP6V0E2/BCL2/CLCN3/CLN3/CORIN/CYP11B2/EDN1/KCNA5/KCNJ2/KCTD7/MLLT6/NPPB/PDK4/SLC8A1/VPS33A	23
GO:0010976	positive regulation of neuron projection development	42/1842	265/17913	0.00301757	0.0184768	0.0127154	AGT/ANKRD1/APOE/ARHGAP35/ARHGDIA/CPNE5/CREB3L2/CUL7/CUX1/CXCR4/CYFIP1/DBN1/DLG5/DNM1L/DPYSL3/DVL3/EP300/EPHA3/FBXO38/FES/FMR1/FN1/FYN/KALRN/KIDINS220/LYN/MAP1B/MAP2K1/MIR221/NME1/OPA1/PLXNB2/PTPRD/RAPGEF1/RGS2/RHOA/S100A9/SERPINF1/SKIL/SLIT2/SMURF1/SYT17	42
GO:0006023	aminoglycan biosynthetic process	21/1842	108/17913	0.00302528	0.0185048	0.0127347	ABCC5/AGRN/B3GAT3/CHST3/CHST7/CHSY1/CHSY3/CSGALNACT2/EGF/EXT1/EXT2/FMOD/GCNT2/GPC6/HSPG2/LUM/OMD/PDGFRB/PRELP/ST3GAL2/TGFB1	21
GO:0042246	tissue regeneration	16/1842	74/17913	0.0030497	0.0186157	0.0128111	CD9/CDKN1A/ENO3/GATA4/GJA1/GSN/IGF1/IGFBP1/KLF5/MIR590/MUSTN1/NINJ2/POSTN/SGCA/SOX15/YAP1	16
GO:0046902	regulation of mitochondrial membrane permeability	16/1842	74/17913	0.0030497	0.0186157	0.0128111	ACAA2/BCL2/BNIP3/CAMK2A/CHCHD10/GSK3B/MIR29A/RHOT1/SPG7/STAT3/THEM4/TP53/TP53BP2/YWHAG/YWHAH/YWHAQ	16
GO:0031345	negative regulation of cell projection organization	29/1842	166/17913	0.00308596	0.0187729	0.0129192	ADCY6/APOE/ARHGDIA/BAG5/BCL11A/DPYSL3/FKBP4/FYN/ID1/INPP5F/MAP2/MAP4/MAP4K4/PLK2/PRKCD/PTPN9/RAP1GAP/RAP1GAP2/RGMA/RHOA/RTN4/SLIT2/SPOCK1/SPP1/SRGAP2C/THY1/TRAK2/ULK2/YWHAH	29
GO:0046486	glycerolipid metabolic process	57/1842	385/17913	0.00308928	0.0187729	0.0129192	ACSL3/AGK/AGPAT2/AJUBA/ALDH5A1/APOA1/APOE/ARF3/CAV3/CHPT1/DGAT1/DGKH/ETNPPL/FBXW7/GNPAT/GPD1L/HADHB/INPP1/INPP4B/INPP5F/INPP5K/IP6K1/LCLAT1/LDLR/LPCAT3/LPCAT4/MECP2/MTMR12/MTMR3/PDGFRB/PGAP1/PGS1/PI4K2A/PIGG/PIK3CA/PIK3CG/PIK3R6/PLA2G15/PLA2G2A/PLA2G4C/PLCE1/PLD6/PLEK/PLEKHA4/PLIN5/PRDX6/PTDSS1/PTDSS2/PTPN11/RGN/SERINC3/SLC44A1/SLC44A2/STARD7/SYNJ2/TAMM41/TAZ	57
GO:0014870	response to muscle inactivity	5/1842	11/17913	0.00310398	0.0187729	0.0129192	CASQ1/FBXO32/HDAC4/SCN5A/SGCA	5
GO:0032908	regulation of transforming growth factor beta1 production	5/1842	11/17913	0.00310398	0.0187729	0.0129192	GATA6/LAPTM4B/LUM/THBS1/TYROBP	5
GO:0033327	Leydig cell differentiation	5/1842	11/17913	0.00310398	0.0187729	0.0129192	AR/CCND1/MGST1/PDGFRA/SGPL1	5
GO:0034115	negative regulation of heterotypic cell-cell adhesion	5/1842	11/17913	0.00310398	0.0187729	0.0129192	APOA1/KLF4/MAP2K5/MBP/MIR221	5
GO:0055015	ventricular cardiac muscle cell development	5/1842	11/17913	0.00310398	0.0187729	0.0129192	BMP10/HEY2/LMNA/NKX2-5/PROX1	5
GO:0070587	regulation of cell-cell adhesion involved in gastrulation	5/1842	11/17913	0.00310398	0.0187729	0.0129192	APOA1/KLF4/MAP2K5/MBP/MIR221	5
GO:1990440	positive regulation of transcription from RNA polymerase II promoter in response to endoplasmic reticulum stress	5/1842	11/17913	0.00310398	0.0187729	0.0129192	ATF3/ATF6B/CEBPB/DDIT3/TP53	5
GO:0044319	wound healing, spreading of cells	9/1842	31/17913	0.0031147	0.0187802	0.0129242	AJUBA/ARHGAP35/CD44/DDR1/HBEGF/ITGA5/MIR221/PHLDB2/RHOA	9
GO:0070570	regulation of neuron projection regeneration	9/1842	31/17913	0.0031147	0.0187802	0.0129242	INPP5F/KLF4/MAP2K1/MAP4K4/MIR221/PRRX1/RGMA/SPP1/THY1	9
GO:0090505	epiboly involved in wound healing	9/1842	31/17913	0.0031147	0.0187802	0.0129242	AJUBA/ARHGAP35/CD44/DDR1/HBEGF/ITGA5/MIR221/PHLDB2/RHOA	9
GO:2000027	regulation of animal organ morphogenesis	40/1842	250/17913	0.00314907	0.0189681	0.0130536	AGT/AGTR2/ANKRD6/AR/BCL2/BMP10/BTBD7/CAV3/CTHRC1/CTNNB1/DVL3/EDN1/ESR1/FBXW7/FGF7/FZD2/GPC6/MIR20A/MSX1/MYC/PIM1/PRICKLE1/PRICKLE2/PSMA3/PSMC2/RHOA/RNF207/ROR1/RUNX2/SFRP1/SMURF1/SMURF2/SULF1/SULF2/TBX5/TGFB1/TGFB2/TNFRSF11B/VANGL1/XBP1	40
GO:0008202	steroid metabolic process	49/1842	321/17913	0.00315905	0.0190089	0.0130816	ACAA1/ACAA2/ACACB/ACADVL/ACAT1/ACOT8/ACOX2/AGT/AGTR1/AKR1C1/APOA1/APOE/APP/ASAH1/ATP1A1/ATP8B1/CEL/CYB5R3/CYP11B1/CYP11B2/CYP1B1/CYP4V2/EGR1/ESR1/FASN/FDX1/HSD17B4/IGFBP7/LDLR/LEP/LEPR/MECP2/NPC1/OSBPL2/PDGFRA/PMVK/PRKAG2/PROX1/RDH5/SCD/SCP2/SGPL1/SMPD1/SP1/SPP1/STAT5B/TIPARP/TM7SF2/YWHAH	49
GO:0050792	regulation of viral process	34/1842	204/17913	0.00319489	0.0191936	0.0132087	APOE/BCL2/BST2/CXCR4/EP300/FCN1/FCN3/FMR1/GSN/HSPA8/IFI16/IFIT1/IFITM1/IFITM2/IFITM3/INPP5K/ISG20/JUN/MDFIC/MIR221/POLR2A/PPID/PROX1/SMARCA4/SP1/SUPT5H/TBC1D20/TNIP1/TRIM27/TRIM35/TRIM8/ZC3H12A/ZFP36/ZNF639	34
GO:0032755	positive regulation of interleukin-6 production	17/1842	81/17913	0.00319947	0.0191936	0.0132087	AIF1/APP/ARHGEF2/CYBA/F2R/F2RL1/FCER1G/HYAL2/IL17D/IL6/LILRA5/MBP/PTPN11/STAT3/TSLP/TYROBP/XBP1	17
GO:0051702	interaction with symbiont	17/1842	81/17913	0.00319947	0.0191936	0.0132087	ANXA2/APOE/CALM2/CTSG/EP300/F2RL1/FMR1/FN1/HSPA8/INPP5K/JUN/MIR221/SMARCA4/SP1/TBC1D20/ZC3H12A/ZNF639	17
GO:0071331	cellular response to hexose stimulus	24/1842	130/17913	0.00326211	0.0195298	0.0134401	ANO1/CYBA/ENDOG/GATA4/HMGN3/MAP4K4/MPC2/NADK/NDUFAF2/NME1/NOX4/OPA1/OXCT1/PIK3CA/RAB11FIP5/RAF1/SERPINF1/SIDT2/SIN3A/SMARCA4/SOX4/UNC13B/VSNL1/XBP1	24
GO:1902807	negative regulation of cell cycle G1/S phase transition	24/1842	130/17913	0.00326211	0.0195298	0.0134401	BCL2/BTG2/CCL2/CCND1/CDKN1A/CTDSP2/DCUN1D3/EP300/FAM107A/FHL1/GADD45A/GPNMB/KANK2/KLF4/MIR133A1/MIR133A2/MIR29A/MIR451A/PKD2/PLK2/SOX4/SUSD2/TP53/WEE1	24
GO:1903706	regulation of hemopoiesis	67/1842	468/17913	0.00328581	0.0196518	0.0135241	ACE/AGO4/ATXN1L/AXL/BCL6/C1QC/CEBPB/CREBBP/CTNNB1/CYLD/EP300/FBN1/FBXW7/FES/FOS/GATA2/GLI3/HCLS1/HMGB2/IL17D/JUN/KLF10/KMT2A/KMT2C/LDB1/LGALS3/LYN/MAFB/MEF2C/MEIS1/MEIS2/MIR221/MITF/MYC/NFKBIA/NFKBIZ/NME1/NOTCH2/NR4A3/NRARP/PIAS3/PIK3R6/PIM1/PRKCQ/PSMA3/PSMC2/PURB/RHOA/SFRP1/SH3RF1/SIN3A/SOCS1/SOS1/STAT3/STAT5B/TESC/TGFB1/THBS1/TMEM178A/TRIB1/TYROBP/XBP1/YAP1/ZC3H12A/ZEB1/ZFP36/ZMIZ1	67
GO:0060038	cardiac muscle cell proliferation	15/1842	68/17913	0.00331263	0.0197723	0.013607	ARID2/BMP10/GATA6/GJA1/HEY2/MEF2C/MEIS1/MIR1-1/MIR590/NKX2-5/PIM1/TBX5/TGFB2/TGFBR3/YAP1	15
GO:0071674	mononuclear cell migration	15/1842	68/17913	0.00331263	0.0197723	0.013607	AIF1/CCL2/CMKLR1/DUSP1/IL6/KARS/LGALS3/LYN/PECAM1/S100A12/SERPINE1/SIRPA/SLIT2/TGFB1/THBS1	15
GO:0001662	behavioral fear response	10/1842	37/17913	0.00333462	0.0198526	0.0136622	APOE/BCL2/DEAF1/GJA1/MECP2/MEF2C/PENK/USP46/VDAC1/VDAC3	10
GO:1905314	semi-lunar valve development	10/1842	37/17913	0.00333462	0.0198526	0.0136622	EMILIN1/GATA4/HEY2/HEYL/NOS3/NOTCH2/SLIT2/TGFB1/TGFB2/TNFRSF1A	10
GO:0010712	regulation of collagen metabolic process	12/1842	49/17913	0.00334285	0.0198526	0.0136622	EMILIN1/ERRFI1/F2R/FAP/GOT1/IL6/ITGB1/MFAP4/MIR29A/PDGFRB/TGFB1/TGFB3	12
GO:0055023	positive regulation of cardiac muscle tissue growth	12/1842	49/17913	0.00334285	0.0198526	0.0136622	BMP10/EDN1/GATA6/HAMP/HEY2/IGF1/MEF2C/MIR590/PIM1/TBX5/TGFBR3/YAP1	12
GO:0060395	SMAD protein signal transduction	12/1842	49/17913	0.00334285	0.0198526	0.0136622	FOS/GDF15/HIPK2/JUN/RBPMS/SKI/SMAD3/SPTBN1/TGFB1/TGFB2/TGFB3/WWTR1	12
GO:0006790	sulfur compound metabolic process	52/1842	346/17913	0.00335235	0.019889	0.0136873	ACACB/ACAT1/ACOT6/ACOT8/ACSF2/ACSL3/ACSS2/ALDH5A1/CHST3/CHST7/CHSY1/CHSY3/CSGALNACT2/DGAT1/DLD/FASN/FMOD/FXN/GCDH/GLB1/GSS/GSTM4/HSD17B4/IDUA/LUM/MCCC2/METTL16/MGST1/MLYCD/MPC2/MTHFR/NFU1/NOX4/OMD/PAPSS1/PCCA/PDHA1/PDHB/PDK4/PHGDH/PMVK/PRELP/SCD/SNCA/SP1/ST3GAL2/STAT5B/SUCLA2/SUOX/THEM4/TKTL1/TST	52
GO:0060993	kidney morphogenesis	19/1842	95/17913	0.00336514	0.0199449	0.0137258	AGT/AGTR2/BCL2/CTNNB1/DCHS1/FAT4/GLI3/GZF1/IRX2/IRX3/KLHL3/MYC/OSR1/PDGFRB/PKD2/SOX4/TGFB1/WWTR1/ZMPSTE24	19
GO:0043300	regulation of leukocyte degranulation	11/1842	43/17913	0.00339456	0.0200591	0.0138043	F2RL1/FCER1G/FES/FGR/GAB2/GATA2/ITGB2/LYN/NPPA/RAC2/VAMP8	11
GO:0044060	regulation of endocrine process	11/1842	43/17913	0.00339456	0.0200591	0.0138043	AGT/AGTR1/AGTR2/C1QTNF1/F2R/F2RL1/LEP/PTPN11/RAB11FIP3/RAB11FIP5/RETN	11
GO:1904407	positive regulation of nitric oxide metabolic process	11/1842	43/17913	0.00339456	0.0200591	0.0138043	AGT/AGTR2/AIF1/AKT1/EDN1/ITGB2/JAK2/KLF2/KLF4/PKD2/SMAD3	11
GO:0071774	response to fibroblast growth factor	26/1842	145/17913	0.0034224	0.0202034	0.0139037	CBL/CCL2/CD44/CTNNB1/ELK1/FAT4/FGF12/FGF18/FGF7/HYAL2/KDM5B/MIR1-1/POLR2A/POSTN/PTPN11/RUNX2/SFRP1/SHOC2/SMOC2/SNCA/SPRED2/SULF1/SULF2/THBS1/TNC/ZFP36	26
GO:0046661	male sex differentiation	28/1842	160/17913	0.00350972	0.0206913	0.0142394	AGO4/AR/ARID5B/ASB1/BCL2/CBL/CCND1/CTNNB1/ESR1/FKBP4/GATA4/GATA6/GJA1/HMGB2/HSD17B4/LHFPL2/MAMLD1/MGST1/NUPR1/PDGFRA/PDGFRB/SFRP1/SGPL1/SOX15/STAT5B/TBC1D20/TESC/TGFB2	28
GO:0002021	response to dietary excess	8/1842	26/17913	0.00352601	0.0206913	0.0142394	ADRB1/APOE/BMP8A/GDF15/LEP/OMA1/RMI1/SGIP1	8
GO:0034114	regulation of heterotypic cell-cell adhesion	8/1842	26/17913	0.00352601	0.0206913	0.0142394	APOA1/CD44/GCNT2/KLF4/MAP2K5/MBP/MIR221/THY1	8
GO:0043501	skeletal muscle adaptation	8/1842	26/17913	0.00352601	0.0206913	0.0142394	ACTA1/ATP2A2/IGFBP5/MYH7/MYOZ2/TNNC1/TNNT1/TRIM63	8
GO:1903579	negative regulation of ATP metabolic process	8/1842	26/17913	0.00352601	0.0206913	0.0142394	DDIT4/HDAC4/NUPR1/PID1/RHOA/SNCA/STAT3/TP53	8
GO:1904754	positive regulation of vascular associated smooth muscle cell migration	8/1842	26/17913	0.00352601	0.0206913	0.0142394	AGT/ATP7A/DOCK4/IGFBP5/MIR20A/MIR221/MIR451A/NR4A3	8
GO:0046474	glycerophospholipid biosynthetic process	35/1842	213/17913	0.00355774	0.0208568	0.0143533	ACSL3/AGK/AGPAT2/AJUBA/APOA1/ARF3/CHPT1/ETNPPL/GNPAT/GPD1L/INPP4B/INPP5F/INPP5K/LCLAT1/LPCAT4/MTMR12/MTMR3/PGAP1/PGS1/PI4K2A/PIGG/PIK3CA/PIK3CG/PIK3R6/PLA2G2A/PLD6/PLEKHA4/PTDSS1/PTDSS2/SLC44A1/SLC44A2/STARD7/SYNJ2/TAMM41/TAZ	35
GO:0046365	monosaccharide catabolic process	14/1842	62/17913	0.00356863	0.0208587	0.0143546	ALDOA/ALDOC/BPGM/ENO1/ENO3/GALK1/GLB1/GPI/LRP5/PFKL/PFKM/PGAM2/TKTL1/TP53	14
GO:1901016	regulation of potassium ion transmembrane transporter activity	14/1842	62/17913	0.00356863	0.0208587	0.0143546	ACTN2/ATP1B1/ATP1B3/CAV3/FHL1/KCNAB1/KCNIP2/KLHL24/MIR1-1/MIR133A1/MIR133A2/NPPA/RNF207/WWP2	14
GO:2001244	positive regulation of intrinsic apoptotic signaling pathway	14/1842	62/17913	0.00356863	0.0208587	0.0143546	BCL2/DDIT3/DNM1L/FBXW7/MSX1/NCK2/NUPR1/PLEKHF1/PRKRA/S100A8/S100A9/SERINC3/SKIL/TP53	14
GO:0032535	regulation of cellular component size	48/1842	315/17913	0.00357889	0.0208902	0.0143763	ACTN2/AKT1/APOE/ARHGAP35/ARPC1B/ARPC3/ATP13A2/ATP7A/CAV3/CCL11/CLCN3/CORO1A/CYFIP1/EDN1/F2RL1/FCHSD2/FHOD3/FN1/GSK3B/GSN/HCK/HCLS1/HP1BP3/IQGAP2/LMOD2/LRRC8A/MAP1B/MAP2/MSN/NCK2/PICALM/PLEK/PLEKHG2/PLEKHH2/PRKCD/PRR16/RAP1GAP2/RHOA/RILP/RTN4/SLIT2/SPP1/SPTAN1/SPTBN1/SWAP70/TRIM27/ULK2/WAS	48
GO:0031330	negative regulation of cellular catabolic process	39/1842	244/17913	0.00358107	0.0208902	0.0143763	ACACB/AKT1/ANXA2/ATP13A2/ATP2B4/BAG5/BCL2/CCAR2/DDIT4/FHIT/FMR1/GATA4/GOLGA2/HDAC4/HIPK2/KDM4A/LAPTM4B/LEP/LEPR/MAP1A/NAMPT/NPC1/NUPR1/PIK3CA/PIK3CG/PLIN5/PTPN3/RBM24/RGN/SCO1/SMCR8/SNCA/STAT3/TAF9/TIMP1/TP53/UCHL5/USP14/ZFP36	39
GO:0048813	dendrite morphogenesis	24/1842	131/17913	0.00361369	0.0210597	0.0144929	ABI1/CAMK2A/CUL7/CUX1/DBN1/DNM1L/DTNBP1/FARP1/FYN/GSK3B/ID1/ITGB1/KALRN/KIDINS220/MAP2/OPA1/PDLIM5/PICALM/PREX2/PTPRD/RAP2A/SIPA1L1/TRAK2/YWHAH	24
GO:0014855	striated muscle cell proliferation	17/1842	82/17913	0.003658	0.021297	0.0146562	ARID2/BMP10/GATA6/GJA1/HEY2/JAK2/MEF2C/MEIS1/MIR1-1/MIR590/NKX2-5/PIM1/STAT3/TBX5/TGFB2/TGFBR3/YAP1	17
GO:0003158	endothelium development	23/1842	124/17913	0.0036919	0.0214522	0.014763	COL18A1/CTNNB1/CXCR4/F2RL1/FASN/GJA1/HEG1/HEY2/ID1/KDM6B/MIR1-1/MSN/PDE4D/PECAM1/PROX1/RAPGEF1/RHOA/S1PR3/SOX18/STARD13/TJP1/TNFRSF1A/ZEB1	23
GO:2000134	negative regulation of G1/S transition of mitotic cell cycle	23/1842	124/17913	0.0036919	0.0214522	0.014763	BCL2/BTG2/CCL2/CCND1/CDKN1A/CTDSP2/DCUN1D3/EP300/FAM107A/FHL1/GADD45A/GPNMB/KANK2/KLF4/MIR133A1/MIR133A2/MIR29A/MIR451A/PKD2/PLK2/SOX4/TP53/WEE1	23
GO:0034612	response to tumor necrosis factor	44/1842	284/17913	0.00376919	0.0218217	0.0150173	AFF3/AKT1/ANKRD1/APOA1/ARHGEF2/ASAH1/BIRC3/CASP3/CCL2/CD14/CLIP3/CYBA/CYLD/EDN1/ENDOG/F2RL1/GSS/HAMP/HDAC4/HIPK1/HYAL2/INPP5K/JAK2/KARS/KLF2/KRT8/LTBR/NFKBIA/PIAS3/PID1/PLVAP/POSTN/PSMA3/PSMC2/RELA/SFRP1/SPPL2A/TAX1BP1/THBS1/TNFRSF11B/TNFRSF19/TNFRSF1A/ZC3H12A/ZFP36	44
GO:0036035	osteoclast development	6/1842	16/17913	0.00377966	0.0218217	0.0150173	ANXA2/FBN1/FBXW7/LRRK1/NOTCH2/TYROBP	6
GO:0045989	positive regulation of striated muscle contraction	6/1842	16/17913	0.00377966	0.0218217	0.0150173	ACE2/ATP1A1/MIR1-1/NPPA/RGS2/RNF207	6
GO:0060965	negative regulation of gene silencing by miRNA	6/1842	16/17913	0.00377966	0.0218217	0.0150173	ESR1/POU5F1/TGFB1/TP53/ZC3H12A/ZMPSTE24	6
GO:0001819	positive regulation of cytokine production	64/1842	446/17913	0.00378857	0.0218217	0.0150173	AGPAT2/AGT/AGTR2/AIF1/APP/ARHGEF2/BCL3/BIRC3/CD14/CEBPB/CREBBP/CTNNB1/CYBA/CYBB/CYP1B1/DDIT3/EGR1/EIF2AK3/EP300/F2R/F2RL1/FCER1G/FCN1/FGR/GATA4/GSDMD/HAVCR2/HEG1/HLA-DPB1/HMGB2/HRAS/HYAL2/IFI16/IL17D/IL18R1/IL1RL1/IL6/JAK2/KARS/LEP/LILRA5/LUM/LY96/MBP/NR4A3/PDE4D/POLR3B/POSTN/PRKCQ/PTPN11/RELA/SERPINE1/SMAD3/SPTBN1/STAT3/STAT5B/SULF1/SULF2/TGFB1/THBS1/TSLP/TYROBP/XBP1/XRCC6	64
GO:0006096	glycolytic process	21/1842	110/17913	0.00379609	0.0218217	0.0150173	ALDOA/ALDOC/BPGM/DDIT4/ENO1/ENO3/GALK1/GPI/HDAC4/IGF1/LDHA/NUP188/NUP214/NUPR1/PFKL/PFKM/PGAM2/POM121C/PRKAG2/STAT3/TP53	21
GO:0002089	lens morphogenesis in camera-type eye	7/1842	21/17913	0.00381078	0.0218217	0.0150173	CTNNB1/HIPK1/HIPK2/MEIS1/PROX1/SKI/TBC1D20	7
GO:0003094	glomerular filtration	7/1842	21/17913	0.00381078	0.0218217	0.0150173	F2R/F2RL1/GJA1/MCAM/MYO1E/SULF1/SULF2	7
GO:0003177	pulmonary valve development	7/1842	21/17913	0.00381078	0.0218217	0.0150173	HEY2/HEYL/NOS3/NOTCH2/SLIT2/TGFB2/TNFRSF1A	7
GO:0003283	atrial septum development	7/1842	21/17913	0.00381078	0.0218217	0.0150173	GATA4/HEY2/NKX2-5/NOTCH2/SOX4/TBX5/TGFB2	7
GO:0032373	positive regulation of sterol transport	7/1842	21/17913	0.00381078	0.0218217	0.0150173	ANXA2/APOA1/APOE/LIPG/NFKBIA/PLTP/SCP2	7
GO:0032376	positive regulation of cholesterol transport	7/1842	21/17913	0.00381078	0.0218217	0.0150173	ANXA2/APOA1/APOE/LIPG/NFKBIA/PLTP/SCP2	7
GO:0036344	platelet morphogenesis	7/1842	21/17913	0.00381078	0.0218217	0.0150173	ACTN1/CASP3/EP300/MEF2C/MYH9/PTPN11/VPS33A	7
GO:0036499	PERK-mediated unfolded protein response	7/1842	21/17913	0.00381078	0.0218217	0.0150173	ATF3/CCL2/DDIT3/EIF2AK3/IGFBP1/NCK2/PTPN1	7
GO:0070920	regulation of production of small RNA involved in gene silencing by RNA	7/1842	21/17913	0.00381078	0.0218217	0.0150173	ESR1/MAP2K1/MAP2K2/TGFB1/TP53/ZC3H12A/ZMPSTE24	7
GO:1903039	positive regulation of leukocyte cell-cell adhesion	35/1842	214/17913	0.00384349	0.0219878	0.0151316	AIF1/AKT1/BCL6/CCL2/CD209/CD44/CORO1A/CYLD/FYN/GLI3/HAVCR2/HLA-DPB1/IGF1/IL6/ITGB2/LEP/LYN/MAP3K8/NCK2/NFKBIZ/NR4A3/PDCD1/PIK3CA/PIK3R6/PRKCQ/PTPN11/RELA/RHOA/SOCS1/STAT5B/TFRC/TGFB1/THY1/XBP1/ZMIZ1	35
GO:0002064	epithelial cell development	33/1842	199/17913	0.00394151	0.0225213	0.0154988	ADAMTSL4/AR/CDKN1A/COL18A1/CTNNB1/CXCR4/ESR1/F2RL1/FASN/FAT1/FEM1B/FLNB/GJA1/GPR4/GSK3B/HEG1/HSD17B4/ID1/KLF5/MSN/MYO1E/PDE4D/PECAM1/PROX1/RAPGEF1/S1PR3/SIDT2/SLC4A5/SOX18/TBC1D20/TJP1/TNFRSF1A/XBP1	33
GO:0090504	epiboly	9/1842	32/17913	0.00394437	0.0225213	0.0154988	AJUBA/ARHGAP35/CD44/DDR1/HBEGF/ITGA5/MIR221/PHLDB2/RHOA	9
GO:0030705	cytoskeleton-dependent intracellular transport	27/1842	154/17913	0.00399243	0.0227738	0.0156725	AP3M2/APP/BAG3/BICD1/CLN3/DTNBP1/FYCO1/HTT/IFT140/KIF13A/KIF3B/KIF3C/MAP1A/MAP1B/MAP2/MAPK8IP3/OPA1/RHOT1/SPG7/TERF2/TRAF3IP1/TRAK2/TUBA1A/TUBA1B/TUBA1C/TUBB/UCHL1	27
GO:0050731	positive regulation of peptidyl-tyrosine phosphorylation	31/1842	184/17913	0.00400639	0.0228314	0.0157122	ABI1/ACE/AGT/ARHGEF2/CD44/CRLF1/DOK7/EGF/FBXW7/FGF7/FYN/HBEGF/HCLS1/IGF1/IL6/ITGA5/JAK2/LEP/LILRA5/LRRK1/LYN/MIR221/NOX4/PECAM1/PTPN1/STAT3/TGFB1/THBS4/TNFRSF1A/TP53/TSLP	31
GO:0009166	nucleotide catabolic process	29/1842	169/17913	0.00402759	0.0229301	0.0157801	ACAT1/ALDOA/ALDOC/BPGM/DDIT4/ENO1/ENO3/GALK1/GPI/HDAC4/IGF1/LDHA/MLYCD/NT5C2/NTHL1/NUDT9/NUP188/NUP214/NUPR1/PDE4D/PDE5A/PDE7A/PFKL/PFKM/PGAM2/POM121C/PRKAG2/STAT3/TP53	29
GO:0035196	production of miRNAs involved in gene silencing by miRNA	11/1842	44/17913	0.00411331	0.0233201	0.0160485	AGO4/DICER1/ESR1/MAP2K1/MAP2K2/PRKRA/SMAD3/TGFB1/TP53/ZC3H12A/ZMPSTE24	11
GO:0010667	negative regulation of cardiac muscle cell apoptotic process	10/1842	38/17913	0.00411578	0.0233201	0.0160485	GATA4/HEY2/JAK2/MIR133A1/MIR133A2/MIR20A/MIR590/MYOCD/NKX2-5/NUPR1	10
GO:0042149	cellular response to glucose starvation	10/1842	38/17913	0.00411578	0.0233201	0.0160485	BCL2/EIF2AK3/HIGD1A/IFI16/IMPACT/MTMR3/SLC2A1/TP53/XBP1/ZC3H12A	10
GO:0071867	response to monoamine	10/1842	38/17913	0.00411578	0.0233201	0.0160485	ADCY6/APP/ATP2B4/ID1/NR4A3/PDE4D/PENK/RYR2/SIN3A/SNCA	10
GO:0071869	response to catecholamine	10/1842	38/17913	0.00411578	0.0233201	0.0160485	ADCY6/APP/ATP2B4/ID1/NR4A3/PDE4D/PENK/RYR2/SIN3A/SNCA	10
GO:0032943	mononuclear cell proliferation	39/1842	246/17913	0.00413042	0.0233807	0.0160902	ACE/AIF1/BCL2/BCL6/CASP3/CD209/CDKN1A/CEBPB/CORO1A/CTNNB1/DLG5/DOCK2/FYN/GJA1/GPNMB/HAVCR2/HLA-DPB1/IGF1/IL6/LEP/LGALS3/LRRC32/MEF2C/MSN/NCK2/PDE5A/PIK3CG/PRKCD/PRKCQ/RAC2/SH3RF1/SLC39A10/SOS1/STAT5B/TFRC/TGFB1/TP53/TYROBP/VSIG4	39
GO:0071772	response to BMP	26/1842	147/17913	0.00413923	0.0233859	0.0160938	BMP10/COMP/EGR1/FBN1/GATA4/GATA6/HEYL/HIPK2/HTRA1/ID1/MIR20A/MSX1/MYH6/NKX2-5/NUMA1/RUNX2/RYR2/SFRP1/SFRP4/SKI/SMURF1/SMURF2/SULF1/TGFBR3/VWC2/ZNF423	26
GO:0071773	cellular response to BMP stimulus	26/1842	147/17913	0.00413923	0.0233859	0.0160938	BMP10/COMP/EGR1/FBN1/GATA4/GATA6/HEYL/HIPK2/HTRA1/ID1/MIR20A/MSX1/MYH6/NKX2-5/NUMA1/RUNX2/RYR2/SFRP1/SFRP4/SKI/SMURF1/SMURF2/SULF1/TGFBR3/VWC2/ZNF423	26
GO:0035914	skeletal muscle cell differentiation	14/1842	63/17913	0.00416312	0.0234443	0.016134	ATF3/BTG2/EGR1/FOS/HEYL/HLF/KLF5/MEF2C/MIR1-1/MYLK2/MYOCD/NUPR1/RBM24/SMYD1	14
GO:0006112	energy reserve metabolic process	17/1842	83/17913	0.00416938	0.0234443	0.016134	AGL/AKT1/GAA/GFPT2/GSK3B/IGF1/INPP5K/LEPR/MYC/PCDH12/PHKA2/PID1/PPP1R1A/PPP1R3C/PRKAG2/PYGB/SORBS1	17
GO:0006672	ceramide metabolic process	17/1842	83/17913	0.00416938	0.0234443	0.016134	AGK/ALDH5A1/ASAH1/B3GALT2/CLN3/GLA/NEU3/ORMDL3/PLA2G15/PPP2CA/PRKCD/SGPL1/SMPD1/SPTLC2/ST6GALNAC6/ST8SIA2/TNFRSF1A	17
GO:0008625	extrinsic apoptotic signaling pathway via death domain receptors	17/1842	83/17913	0.00416938	0.0234443	0.016134	ARHGEF2/ATF3/BAG3/BCL2/FEM1B/HMGB2/LGALS3/MIR221/NOS3/RAF1/SERPINE1/SFRP1/SKIL/SORT1/THBS1/TMBIM1/TNFRSF1A	17
GO:0032410	negative regulation of transporter activity	17/1842	83/17913	0.00416938	0.0234443	0.016134	ACTN2/ATP1A2/CALM2/CAV3/CTTNBP2NL/FGF12/FMR1/KCNAB1/MIR1-1/MIR133A1/MIR133A2/NDFIP2/OSR1/PKD2/PLN/SNCA/WWP2	17
GO:2000045	regulation of G1/S transition of mitotic cell cycle	30/1842	177/17913	0.00419711	0.0235779	0.0162259	AIF1/AKT1/BCL2/BTG2/CCL2/CCND1/CCND2/CDKN1A/CTDSP2/DCUN1D3/EP300/FAM107A/FHL1/GADD45A/GPNMB/KANK2/KCNA5/KLF4/LSM10/MIR133A1/MIR133A2/MIR221/MIR29A/MIR451A/MIR590/PKD2/PLK2/SOX4/TP53/WEE1	30
GO:0030100	regulation of endocytosis	41/1842	262/17913	0.00421949	0.0236811	0.016297	ANKRD13A/ANXA2/APOA1/APOE/ATAD1/ATG3/AXL/BICD1/CAV3/CBL/CCL2/CD14/CLIP3/CYBA/DNM1L/DOCK2/EGF/EPHA3/F2RL1/FGR/FMR1/GATA2/HCK/HIP1/LGALS3/LRSAM1/MFGE8/MIR20A/PICALM/PTPN1/RAPGEF1/SERPINE1/SFRP4/SGIP1/SH3GL2/SIRPA/SNCA/SYT11/TGFB1/UBQLN2/USP46	41
GO:0006757	ATP generation from ADP	21/1842	111/17913	0.00423899	0.0237681	0.0163568	ALDOA/ALDOC/BPGM/DDIT4/ENO1/ENO3/GALK1/GPI/HDAC4/IGF1/LDHA/NUP188/NUP214/NUPR1/PFKL/PFKM/PGAM2/POM121C/PRKAG2/STAT3/TP53	21
GO:0071804	cellular potassium ion transport	25/1842	140/17913	0.00428024	0.0239539	0.0164847	ACTN2/ATP1A1/ATP1A2/ATP1A3/ATP1B1/ATP1B3/CAV3/FHL1/HCN4/KCNA5/KCNAB1/KCNIP2/KCNJ2/KCNJ8/KCNT1/KLHL24/MIR1-1/MIR133A1/MIR133A2/NPPA/PKD2/RGS4/RNF207/TMEM38B/WWP2	25
GO:0071805	potassium ion transmembrane transport	25/1842	140/17913	0.00428024	0.0239539	0.0164847	ACTN2/ATP1A1/ATP1A2/ATP1A3/ATP1B1/ATP1B3/CAV3/FHL1/HCN4/KCNA5/KCNAB1/KCNIP2/KCNJ2/KCNJ8/KCNT1/KLHL24/MIR1-1/MIR133A1/MIR133A2/NPPA/PKD2/RGS4/RNF207/TMEM38B/WWP2	25
GO:0031334	positive regulation of protein complex assembly	38/1842	239/17913	0.00437547	0.0244638	0.0168356	AJUBA/ARPC1B/ARPC3/CAV3/CCL11/CORO1A/CTNNB1/CYFIP1/DCTN1/ESR1/FCHSD2/FES/FSCN1/GSK3B/GSN/HCK/IQGAP2/JUN/LCP1/LMOD2/MAP1B/MECP2/MED25/MITF/MMP3/MSN/NAV3/NCK2/NKX2-5/NUMA1/PLEK/RHOA/TGFB1/TP53/TRIM27/UNC13B/WARS/WAS	38
GO:1904427	positive regulation of calcium ion transmembrane transport	15/1842	70/17913	0.0044315	0.0247537	0.0170351	ATP1B1/CACNA2D1/CACNB2/CALM2/CASQ1/F2R/HSPA2/HTT/JPH2/MIR1-1/PKD2/RGN/RYR2/SNCA/THY1	15
GO:0032890	regulation of organic acid transport	13/1842	57/17913	0.00447255	0.0248657	0.0171122	ACE2/AGT/AGTR2/AKT1/ATP1A2/EDN1/LEP/OSR1/PLA2R1/RGS2/RGS4/SNCA/THBS1	13
GO:0043525	positive regulation of neuron apoptotic process	13/1842	57/17913	0.00447255	0.0248657	0.0171122	AIFM1/BACE1/CASP3/CTNNB1/DDIT3/FBXW7/HDAC4/JUN/NUPR1/RHOA/TGFB2/TP53/TYROBP	13
GO:0060688	regulation of morphogenesis of a branching structure	13/1842	57/17913	0.00447255	0.0248657	0.0171122	AGT/AGTR2/AR/BCL11A/BTBD7/CAV3/CTNNB1/ESR1/FGF7/RTN4/SFRP1/SULF1/TGFB1	13
GO:1902041	regulation of extrinsic apoptotic signaling pathway via death domain receptors	13/1842	57/17913	0.00447255	0.0248657	0.0171122	ARHGEF2/ATF3/FEM1B/HMGB2/LGALS3/MIR221/NOS3/RAF1/SERPINE1/SFRP1/SKIL/THBS1/TMBIM1	13
GO:1903428	positive regulation of reactive oxygen species biosynthetic process	13/1842	57/17913	0.00447255	0.0248657	0.0171122	AGT/AGTR2/AIF1/AKT1/CYBA/EDN1/HDAC4/ITGB2/JAK2/KLF2/KLF4/PKD2/SMAD3	13
GO:0009896	positive regulation of catabolic process	57/1842	392/17913	0.00456843	0.0253749	0.0174626	AKT1/APOE/BAG3/BNIP3/BTG2/CALCOCO2/CAMKK2/CAV3/CTSC/EGF/ENDOG/FBXW7/FMR1/FOXO1/FYCO1/GJA1/GSK3B/HTT/IGF1/IL6/LDLR/LRSAM1/METTL16/MFN2/MSN/NKD2/NNT/NUPR1/PLEKHF1/PLIN5/PLK2/PRICKLE1/PRKCD/PSMC2/PTPN1/RBM24/RGN/RILP/RNF152/SCOC/SH3D19/SH3RF2/SMCR8/SMURF1/SNCA/SNX1/SPTLC2/SUPT5H/TIPARP/TRIB1/TRIM8/UBQLN2/ULK1/UPF1/ZC3H12A/ZFAND2A/ZFP36	57
GO:2001242	regulation of intrinsic apoptotic signaling pathway	28/1842	163/17913	0.00458677	0.0254529	0.0175163	AKT1/ARHGEF2/BAG5/BCL2/CCAR2/CD44/CYLD/DDIT3/DNM1L/EIF2AK3/ENO1/FBXW7/IVNS1ABP/MSX1/NCK2/NUPR1/OPA1/PLEKHF1/PRKRA/PTPN1/S100A8/S100A9/SERINC3/SKIL/TAF9/TP53/VDAC2/XBP1	28
GO:0010810	regulation of cell-substrate adhesion	33/1842	201/17913	0.00461374	0.0255377	0.0175747	APOA1/BCL2/BCL6/COL16A1/COL8A1/DAPK3/DOCK1/EPHA3/FAM107A/FN1/GCNT2/GSK3B/ITGA5/JAK2/LDB1/MAP4K4/NID1/PEAK1/PHLDB2/PLAU/POSTN/PPM1F/RAC2/RHOA/S100A10/SERPINE1/SFRP1/SMAD3/SMOC2/SPOCK1/THBS1/THY1/VWC2	33
GO:0008306	associative learning	16/1842	77/17913	0.00461931	0.0255377	0.0175747	ADCY3/AGT/APP/ATP1A2/BRSK1/BTG2/CLN3/DEAF1/FOS/ITGB1/KRAS/MAP1A/MECP2/MEIS2/NPTX2/SYNPO	16
GO:0030279	negative regulation of ossification	16/1842	77/17913	0.00461931	0.0255377	0.0175747	BCL2/CHSY1/GDF10/HDAC4/ID1/ID3/IGFBP5/LRP5/MEF2C/RANBP3L/SFRP1/SKI/SMAD3/SMURF1/SRGN/TGFB1	16
GO:0051851	modification by host of symbiont morphology or physiology	16/1842	77/17913	0.00461931	0.0255377	0.0175747	ANXA2/APOE/CALM2/CTSG/EP300/F2RL1/FMR1/HSPA8/INPP5K/JUN/MIR221/SMARCA4/SP1/TBC1D20/ZC3H12A/ZNF639	16
GO:0043903	regulation of symbiosis, encompassing mutualism through parasitism	37/1842	232/17913	0.00463344	0.025592	0.017612	ANXA2/APOE/BCL2/BST2/CTSG/CXCR4/EP300/F2RL1/FCN1/FCN3/FMR1/GSN/HSPA8/IFI16/IFIT1/IFITM1/IFITM2/IFITM3/INPP5K/ISG20/JUN/MDFIC/MIR221/POLR2A/PPID/PROX1/SMARCA4/SP1/SUPT5H/TBC1D20/TNIP1/TRIM27/TRIM35/TRIM8/ZC3H12A/ZFP36/ZNF639	37
GO:1903510	mucopolysaccharide metabolic process	21/1842	112/17913	0.00472397	0.0260677	0.0179394	ABCC5/AKT1/CD44/CHST3/CHST7/CHSY1/CHSY3/CSGALNACT2/EGF/FMOD/GLB1/HYAL2/IDUA/ITIH5/LUM/LYVE1/OMD/PIM1/PRELP/ST3GAL2/TGFB1	21
GO:0050900	leukocyte migration	66/1842	467/17913	0.0047442	0.026087	0.0179526	AIF1/AKT1/APP/ATP1B1/ATP1B3/BSG/CCL11/CCL2/CD44/CD9/CMKLR1/CORO1A/CXADR/CXCR4/DUSP1/EDN1/EDN2/EMILIN1/F2RL1/FCER1G/FN1/FYN/GLG1/GRB14/HCK/IL6/ITGA5/ITGA9/ITGB1/ITGB2/JAM2/KARS/LEP/LGALS3/LYN/MMP28/MSN/MYH9/PDE4D/PECAM1/PIK3CA/PIK3CG/PLVAP/PROS1/PTPN11/RAC2/RHOA/S100A12/S100A8/S100A9/SERPINE1/SHC1/SIRPA/SLC16A1/SLC16A3/SLC7A5/SLC7A7/SLIT2/SOS1/STAT5B/SWAP70/TGFB1/TGFB2/THBS1/THBS4/THY1	66
GO:0032781	positive regulation of ATPase activity	12/1842	51/17913	0.00474509	0.026087	0.0179526	ATP1B1/ATP1B3/DNAJC19/HSPA2/MYBPC3/MYL3/RAB3A/RGN/RYR2/TNNT2/TOR1AIP1/TPM1	12
GO:2000677	regulation of transcription regulatory region DNA binding	12/1842	51/17913	0.00474509	0.026087	0.0179526	CTNNB1/DDIT3/EP300/FBXW7/HEY2/IGF1/KLF4/MSX1/NSD1/SIN3A/TGFB1/ZMPSTE24	12
GO:2000772	regulation of cellular senescence	12/1842	51/17913	0.00474509	0.026087	0.0179526	BCL6/KRAS/MAP3K3/MIR590/NAMPT/NUAK1/PLK2/TERF2/TP53/VASH1/YPEL3/ZMPSTE24	12
GO:0050821	protein stabilization	29/1842	171/17913	0.00478153	0.0262247	0.0180474	APOA1/ATP1B1/ATP1B3/BAG3/BAG5/CDKN1A/CRYAB/DVL3/EP300/FBXW7/GNAQ/HIP1/IGF1/LAMP2/MSX1/NAA15/PIM1/PRKCD/PRKRA/RTN4/SEC16A/SMAD3/SOX4/TAF9/TCP1/TESC/TP53/TRIM44/TYROBP	29
GO:0090288	negative regulation of cellular response to growth factor stimulus	27/1842	156/17913	0.00478307	0.0262247	0.0180474	AGT/AGTR2/EMILIN1/FBN1/GLG1/HGS/HIPK2/HTRA1/MIR1-1/MIR20A/MMRN2/PTPN1/RASL11B/SFRP1/SKI/SLIT2/SMAD3/SMURF1/SMURF2/SULF1/SULF2/TGFB1/TGFB3/TGFBR3/THBS1/TP53/VWC2	27
GO:0045446	endothelial cell differentiation	20/1842	105/17913	0.00478344	0.0262247	0.0180474	COL18A1/CTNNB1/CXCR4/F2RL1/FASN/HEG1/HEY2/ID1/KDM6B/MIR1-1/MSN/PDE4D/PECAM1/PROX1/RAPGEF1/S1PR3/SOX18/TJP1/TNFRSF1A/ZEB1	20
GO:1902108	regulation of mitochondrial membrane permeability involved in apoptotic process	14/1842	64/17913	0.00483548	0.0264855	0.0182269	ACAA2/BCL2/BNIP3/CAMK2A/CHCHD10/GSK3B/MIR29A/RHOT1/THEM4/TP53/TP53BP2/YWHAG/YWHAH/YWHAQ	14
GO:0030509	BMP signaling pathway	24/1842	134/17913	0.00486457	0.0265234	0.018253	BMP10/COMP/EGR1/FBN1/GATA4/HIPK2/HTRA1/ID1/MIR20A/MSX1/MYH6/NKX2-5/NUMA1/RUNX2/RYR2/SFRP1/SFRP4/SKI/SMURF1/SMURF2/SULF1/TGFBR3/VWC2/ZNF423	24
GO:0006122	mitochondrial electron transport, ubiquinol to cytochrome c	5/1842	12/17913	0.00487374	0.0265234	0.018253	CYC1/MECP2/UQCRB/UQCRC1/UQCRFS1	5
GO:0032905	transforming growth factor beta1 production	5/1842	12/17913	0.00487374	0.0265234	0.018253	GATA6/LAPTM4B/LUM/THBS1/TYROBP	5
GO:0035330	regulation of hippo signaling	5/1842	12/17913	0.00487374	0.0265234	0.018253	AJUBA/DLG5/MARK3/WTIP/WWC1	5
GO:0042340	keratan sulfate catabolic process	5/1842	12/17913	0.00487374	0.0265234	0.018253	FMOD/GLB1/LUM/OMD/PRELP	5
GO:0051481	negative regulation of cytosolic calcium ion concentration	5/1842	12/17913	0.00487374	0.0265234	0.018253	ATP1A2/GOT1/KCNA5/SLC8A1/SMAD3	5
GO:0070586	cell-cell adhesion involved in gastrulation	5/1842	12/17913	0.00487374	0.0265234	0.018253	APOA1/KLF4/MAP2K5/MBP/MIR221	5
GO:0010922	positive regulation of phosphatase activity	9/1842	33/17913	0.0049372	0.0267703	0.0184229	AGTR2/CALM2/JAK2/MEF2C/PDGFRB/PLEK/RGN/SLC39A10/SMAD3	9
GO:0055094	response to lipoprotein particle	9/1842	33/17913	0.0049372	0.0267703	0.0184229	AKT1/APOE/CD68/CD9/FCER1G/ITGB1/ITGB2/LDLR/NPC1	9
GO:1901186	positive regulation of ERBB signaling pathway	9/1842	33/17913	0.0049372	0.0267703	0.0184229	AGT/AKT1/ARAP1/CBL/EGF/FBXW7/HIP1/RTN4/SOS1	9
GO:1901890	positive regulation of cell junction assembly	9/1842	33/17913	0.0049372	0.0267703	0.0184229	ACE2/AGT/COL16A1/MAP4K4/PPM1F/S100A10/SFRP1/SMAD3/THY1	9
GO:0022602	ovulation cycle process	11/1842	45/17913	0.00494814	0.0267806	0.01843	CASP3/ESR1/LEP/NOS3/PDGFRA/RETN/SGPL1/SLIT2/STAT5B/TGFB2/TGFB3	11
GO:0060412	ventricular septum morphogenesis	11/1842	45/17913	0.00494814	0.0267806	0.01843	FZD2/HEY2/HEYL/MIR1-1/NKX2-5/NOS3/PROX1/SLIT2/SOX4/TGFB2/TGFBR3	11
GO:0043523	regulation of neuron apoptotic process	34/1842	210/17913	0.00509421	0.0274263	0.0188744	AIFM1/AXL/BACE1/BCL2/BTG2/CASP3/CCL2/CEBPB/CLN3/CORO1A/CRLF1/CTNNB1/DDIT3/F2R/FBXW7/FYN/HDAC4/HIPK2/HRAS/JAK2/JUN/KRAS/MECP2/MEF2C/NR4A3/NUPR1/PIK3CA/RHOA/SNCA/TGFB2/TGFB3/TP53/TYROBP/UNC5B	34
GO:0035809	regulation of urine volume	7/1842	22/17913	0.00509988	0.0274263	0.0188744	ADCY6/EDN1/HYAL2/INPP5K/MLLT6/NPPB/NPR3	7
GO:0044321	response to leptin	7/1842	22/17913	0.00509988	0.0274263	0.0188744	CCND1/EDN1/LEP/LEPR/NR4A3/PID1/STAT3	7
GO:0046716	muscle cell cellular homeostasis	7/1842	22/17913	0.00509988	0.0274263	0.0188744	ALDOA/BAG3/CAV3/GAA/LAMP2/PFKM/TGFB1	7
GO:0051195	negative regulation of cofactor metabolic process	7/1842	22/17913	0.00509988	0.0274263	0.0188744	DDIT4/FYN/HDAC4/MMP3/NUPR1/STAT3/TP53	7
GO:0060444	branching involved in mammary gland duct morphogenesis	7/1842	22/17913	0.00509988	0.0274263	0.0188744	AR/CAV3/CCL11/DDR1/ESR1/KDM5B/TGFB1	7
GO:0097205	renal filtration	7/1842	22/17913	0.00509988	0.0274263	0.0188744	F2R/F2RL1/GJA1/MCAM/MYO1E/SULF1/SULF2	7
GO:0001678	cellular glucose homeostasis	25/1842	142/17913	0.00516933	0.0277746	0.019114	ANO1/CYBA/ENDOG/FOXO1/GATA4/HMGN3/MAP4K4/MPC2/NADK/NDUFAF2/NME1/NOX4/OPA1/OXCT1/PIK3CA/RAB11FIP5/RAF1/SERPINF1/SIDT2/SIN3A/SMARCA4/SOX4/UNC13B/VSNL1/XBP1	25
GO:0030521	androgen receptor signaling pathway	13/1842	58/17913	0.00523364	0.0280438	0.0192993	AR/BUD31/CTNNB1/EP300/FHL2/FKBP4/HEYL/PIAS2/RHOA/RNF4/RWDD1/SFRP1/SMARCA4	13
GO:0032370	positive regulation of lipid transport	13/1842	58/17913	0.00523364	0.0280438	0.0192993	ANXA2/APOA1/APOE/C1QTNF1/EDN1/LIPG/NFKBIA/PLA2R1/PLTP/PRKCD/RETN/SCP2/SPP1	13
GO:0060043	regulation of cardiac muscle cell proliferation	13/1842	58/17913	0.00523364	0.0280438	0.0192993	BMP10/GATA6/GJA1/HEY2/MEF2C/MEIS1/MIR1-1/MIR590/NKX2-5/PIM1/TBX5/TGFBR3/YAP1	13
GO:0010508	positive regulation of autophagy	21/1842	113/17913	0.00525399	0.0281136	0.0193473	BAG3/BNIP3/CALCOCO2/CAMKK2/FOXO1/FYCO1/GSK3B/HTT/LRSAM1/MFN2/PLEKHF1/PLK2/RNF152/SCOC/SMCR8/SMURF1/SPTLC2/SUPT5H/TRIM8/ULK1/ZC3H12A	21
GO:0043624	cellular protein complex disassembly	32/1842	195/17913	0.00525617	0.0281136	0.0193473	ACTN2/ARHGEF2/ERAL1/F2RL1/GSN/HSPA8/LMOD2/MAP1B/MRPL1/MRPL16/MRPL3/MRPL35/MRPL38/MRPL44/MRPL50/MRPL52/MRPS14/MRPS18A/MRPS22/MRPS31/MRPS36/MRPS9/MTRF1/MTRF1L/NAV3/PLEK/PLEKHH2/SH3GL2/SPTAN1/SPTBN1/SWAP70/UPF1	32
GO:0010827	regulation of glucose transmembrane transport	16/1842	78/17913	0.00526952	0.0281596	0.019379	AKT1/BRAF/CLIP3/EDN1/EDNRA/GRB10/IGF1/INPP5K/LEP/NR4A3/PID1/PRKAG2/PTPN11/RHOQ/SLC2A1/SORBS1	16
GO:0003184	pulmonary valve morphogenesis	6/1842	17/17913	0.00533887	0.028408	0.0195499	HEY2/HEYL/NOS3/NOTCH2/SLIT2/TGFB2	6
GO:0010224	response to UV-B	6/1842	17/17913	0.00533887	0.028408	0.0195499	BCL2/CDKN1A/HYAL2/MFAP4/MME/RELA	6
GO:0051284	positive regulation of sequestering of calcium ion	6/1842	17/17913	0.00533887	0.028408	0.0195499	CALM2/MIR133A1/MIR133A2/PKD2/RYR2/TGFB1	6
GO:2000831	regulation of steroid hormone secretion	6/1842	17/17913	0.00533887	0.028408	0.0195499	AGT/AGTR1/AGTR2/C1QTNF1/PTPN11/RETN	6
GO:0030330	DNA damage response, signal transduction by p53 class mediator	20/1842	106/17913	0.00534	0.028408	0.0195499	ANKRD1/BCL3/BTG2/CD44/CDKN1A/EP300/GADD45A/HIPK2/MSX1/MYO6/NDRG1/PLA2R1/PLK2/PPM1D/SMYD2/SOX4/SPRED2/TP53/USP10/ZMPSTE24	20
GO:0046427	positive regulation of JAK-STAT cascade	17/1842	85/17913	0.00536859	0.0285345	0.019637	AGT/CRLF1/CYP1B1/F2R/FYN/HCLS1/IGF1/IL6/JAK2/LEP/LYN/MIR221/PECAM1/SOCS1/STAT3/TNFRSF1A/TSLP	17
GO:0045766	positive regulation of angiogenesis	33/1842	203/17913	0.0053803	0.0285711	0.0196621	AGTR1/C6/CCL11/CXCR4/CYBB/CYP1B1/FGF18/GATA2/GATA4/GATA6/HIPK1/HIPK2/ITGA5/ITGB1/ITGB2/KLF4/MAP3K3/MIR1-1/MIR20A/MIR29A/MIR451A/NOS3/PIK3R6/PLK2/RRAS/SASH1/SERPINE1/SMOC2/SP1/STAT3/THBS1/XBP1/ZC3H12A	33
GO:0008593	regulation of Notch signaling pathway	19/1842	99/17913	0.00539347	0.0286153	0.0196926	AKT1/BCL6/CREBBP/EGF/EP300/FBXW7/GATA2/HEY2/MAML1/MAML2/MAML3/NFKBIA/NRARP/POSTN/STAT3/TGFB2/TSPAN5/WWP2/ZMIZ1	19
GO:0090316	positive regulation of intracellular protein transport	26/1842	150/17913	0.00544789	0.0288782	0.0198735	ATG13/B3GAT3/BAG3/FBXW7/FYN/GLI3/GSK3B/HCLS1/HDAC3/HRAS/HYAL2/IPO5/ITGB2/LEP/MFF/PDCD5/PRKCD/RAC2/SAE1/SMAD3/TGFB1/TMEM30B/TP53/UBR5/XPO4/ZC3H12A	26
GO:0045927	positive regulation of growth	41/1842	266/17913	0.00551039	0.0291834	0.0200835	ACACB/AGRN/AKT1/BCL2/BMP10/CPNE5/CXCR4/CYBA/CYFIP1/EDN1/FN1/FOXS1/FXN/GATA6/HAMP/HBEGF/HEY2/IGF1/IGFBP1/LEP/MAP1B/MAP2K5/MEF2C/MIR590/PIM1/PPM1F/PROX1/RHOA/S100A8/S100A9/SFRP1/SMURF1/SOX15/STAT5B/SYT17/TAF9/TBX5/TGFB2/TGFBR3/YAP1/ZNF639	41
GO:0009266	response to temperature stimulus	35/1842	219/17913	0.00558243	0.0295189	0.0203144	ACADVL/ADRB1/AKT1/ANO1/ATP2A2/BAG1/BAG3/BAG5/CAMK2A/CASQ1/CCAR2/CD14/CDKN1A/CREBBP/CRYAB/CXCR4/EIF2AK3/EIF2B3/EP300/FKBP4/FOS/FOXO1/GSK3B/HSPA2/HSPA6/HSPA8/IGF1/IGFBP7/LYN/NFKBIA/NOS3/NUP188/NUP214/POM121C/THBS1	35
GO:0006687	glycosphingolipid metabolic process	14/1842	65/17913	0.00559281	0.0295189	0.0203144	ALDH5A1/ASAH1/B3GALNT1/B3GALT2/CLN3/GLA/GLB1/NEU3/PRKCD/SMPD1/ST6GALNAC6/ST8SIA2/ST8SIA5/SUMF1	14
GO:0014823	response to activity	14/1842	65/17913	0.00559281	0.0295189	0.0203144	ADSSL1/AGT/CBL/COL4A2/CXCR4/CYBA/EDN1/KDM6B/LEP/OPA1/OXCT1/POSTN/RYR2/UQCRC1	14
GO:0048016	inositol phosphate-mediated signaling	12/1842	52/17913	0.00560365	0.0295189	0.0203144	ATP2B4/C10orf71/EDN1/EDN2/FHL2/GSK3B/IGF1/ITPR1/ITPR3/LMCD1/MYOZ2/PLCE1	12
GO:0071320	cellular response to cAMP	12/1842	52/17913	0.00560365	0.0295189	0.0203144	APP/AQP9/FDX1/HCN4/IGFBP5/INPP5K/NOX4/PENK/PIK3CG/PKD2/RAPGEF1/SLC8A1	12
GO:1901185	negative regulation of ERBB signaling pathway	12/1842	52/17913	0.00560365	0.0295189	0.0203144	CBL/EGF/ERRFI1/HBEGF/HGS/MIR133A1/MIR133A2/PTPN3/RNF115/SH3GL2/SH3KBP1/STAM	12
GO:0010634	positive regulation of epithelial cell migration	29/1842	173/17913	0.00565052	0.0297129	0.0204479	AGT/AKT1/AMOTL1/DOCK1/EDN1/FGF18/FGF7/GATA2/GPI/HBEGF/JUN/MAP3K3/MAP4K4/MAPRE2/MIR221/MIR29A/NOS3/PLK2/PPM1F/PROX1/RTN4/SASH1/SMOC2/SP1/SPARC/TGFB1/TGFB2/THBS1/ZC3H12A	29
GO:0071478	cellular response to radiation	29/1842	173/17913	0.00565052	0.0297129	0.0204479	CDKN1A/CREBBP/CRYAB/CYBA/EGR1/ELK1/EP300/FMR1/GADD45A/GUCA1C/HAMP/HIST3H2A/HRAS/HYAL2/IFI16/IMPACT/MFAP4/MME/MYC/NAMPT/NOX4/PPID/RHBDD1/SFRP1/TGFB1/TP53/XRCC6/YAP1/ZMPSTE24	29
GO:0046031	ADP metabolic process	22/1842	121/17913	0.00569023	0.0298952	0.0205734	ALDOA/ALDOC/BPGM/DDIT4/ENO1/ENO3/GALK1/GPI/HDAC4/IGF1/LDHA/NUDT9/NUP188/NUP214/NUPR1/PFKL/PFKM/PGAM2/POM121C/PRKAG2/STAT3/TP53	22
GO:0030511	positive regulation of transforming growth factor beta receptor signaling pathway	8/1842	28/17913	0.00582567	0.0304742	0.0209718	CDKN1C/CREBBP/EP300/GOT1/HIPK2/MYOCD/TGFBR3/THBS1	8
GO:0051294	establishment of spindle orientation	8/1842	28/17913	0.00582567	0.0304742	0.0209718	ARHGEF2/CENPA/DCTN1/HTT/MAP4/NDC80/NDE1/NUMA1	8
GO:1900543	negative regulation of purine nucleotide metabolic process	8/1842	28/17913	0.00582567	0.0304742	0.0209718	DDIT4/HDAC4/NUPR1/PID1/RHOA/SNCA/STAT3/TP53	8
GO:1903846	positive regulation of cellular response to transforming growth factor beta stimulus	8/1842	28/17913	0.00582567	0.0304742	0.0209718	CDKN1C/CREBBP/EP300/GOT1/HIPK2/MYOCD/TGFBR3/THBS1	8
GO:0008654	phospholipid biosynthetic process	39/1842	251/17913	0.00582617	0.0304742	0.0209718	ACSL3/AGK/AGPAT2/AJUBA/APOA1/ARF3/CHPT1/ETNPPL/GNPAT/GPD1L/INPP4B/INPP5F/INPP5K/LCLAT1/LPCAT3/LPCAT4/MTMR12/MTMR3/PGAP1/PGS1/PI4K2A/PIGG/PIK3CA/PIK3CG/PIK3R6/PLA2G2A/PLD6/PLEKHA4/PMVK/PTDSS1/PTDSS2/SLC44A1/SLC44A2/SPTLC2/STARD7/SYNJ2/TAMM41/TAZ/TMEM38B	39
GO:0042866	pyruvate biosynthetic process	21/1842	114/17913	0.0058321	0.0304783	0.0209746	ALDOA/ALDOC/BPGM/DDIT4/ENO1/ENO3/GALK1/GPI/HDAC4/IGF1/LDHA/NUP188/NUP214/NUPR1/PFKL/PFKM/PGAM2/POM121C/PRKAG2/STAT3/TP53	21
GO:1902117	positive regulation of organelle assembly	15/1842	72/17913	0.00583983	0.0304917	0.0209839	ARHGAP35/BMP10/EDN1/FSCN1/HTT/KCTD17/LCP1/LRSAM1/MIR1-1/MSN/MYLK3/NUMA1/PROX1/RHOA/ULK1	15
GO:0009267	cellular response to starvation	24/1842	136/17913	0.00588406	0.0306956	0.0211242	ATF3/BCL2/CDKN1A/EIF2AK3/FOXO1/HIGD1A/HSPA8/IFI16/IMPACT/JUN/KLF10/LAMP2/MTMR3/PDK4/PPM1D/RNF152/SFRP1/SLC2A1/SLC38A2/TP53/WDR45B/WIPI1/XBP1/ZC3H12A	24
GO:0043583	ear development	34/1842	212/17913	0.0059087	0.0307575	0.0211668	ALDH1A3/ATP8B1/BCL2/C1QB/CEBPD/CTHRC1/DCHS1/DDR1/EDN1/FAT4/FRZB/FZD2/GATA2/GLI3/HEY2/LRP10/MAFB/MSX1/NR4A3/OPA1/OSR1/PDGFRB/PRKRA/PROX1/PRRX1/PTPN11/RDH10/ROR1/SPARC/TCAP/TGFB1/TGFB2/TGFB3/ZEB1	34
GO:1904738	vascular associated smooth muscle cell migration	11/1842	46/17913	0.00591151	0.0307575	0.0211668	AGT/ATP7A/DOCK4/IGFBP5/MEF2C/MIR20A/MIR221/MIR451A/MYOCD/NR4A3/TPM1	11
GO:1904752	regulation of vascular associated smooth muscle cell migration	11/1842	46/17913	0.00591151	0.0307575	0.0211668	AGT/ATP7A/DOCK4/IGFBP5/MEF2C/MIR20A/MIR221/MIR451A/MYOCD/NR4A3/TPM1	11
GO:2001257	regulation of cation channel activity	28/1842	166/17913	0.00592848	0.0308187	0.021209	ACTN2/AHNAK/APP/CACNA2D1/CACNB2/CALM2/CAPN1/CASQ1/CCL2/FGF12/FMR1/GRIA3/HRC/HTT/JPH2/KCNAB1/KCNIP2/KLHL24/MEF2C/MIR1-1/MIR133A1/MIR133A2/NPPA/PDE4D/PKD2/PLN/RNF207/SLMAP	28
GO:1904659	glucose transmembrane transport	20/1842	107/17913	0.00594872	0.0308968	0.0212627	AKT1/BRAF/CLIP3/EDN1/EDNRA/GRB10/IGF1/INPP5K/LEP/NR4A3/PID1/PRKAG2/PTPN11/RHOQ/SLC2A1/SLC2A12/SLC2A3/SLC5A1/SORBS1/SORT1	20
GO:0032680	regulation of tumor necrosis factor production	26/1842	151/17913	0.00595411	0.0308977	0.0212633	APP/ARHGEF2/AXL/BCL3/CD14/CYBA/CYBB/DICER1/ERRFI1/FCER1G/GPNMB/HAVCR2/IGF1/IRAK3/JAK2/LEP/LILRA5/LY96/PTPN11/SIRPA/SYT11/THBS1/TRIM27/TYROBP/ZC3H12A/ZFP36	26
GO:0042509	regulation of tyrosine phosphorylation of STAT protein	16/1842	79/17913	0.00599213	0.0310406	0.0213616	CRLF1/FYN/HCLS1/IGF1/IL6/INPP5F/JAK2/LEP/LYN/MIR221/PECAM1/PPP2CA/SOCS1/STAT3/TNFRSF1A/TSLP	16
GO:0072028	nephron morphogenesis	16/1842	79/17913	0.00599213	0.0310406	0.0213616	AGT/AGTR2/BCL2/CTNNB1/DCHS1/FAT4/GLI3/GZF1/IRX2/IRX3/KLHL3/MYC/OSR1/PDGFRB/PKD2/TGFB1	16
GO:0061097	regulation of protein tyrosine kinase activity	17/1842	86/17913	0.00606584	0.0313396	0.0215674	ABI1/ACE/AGT/APP/DOK7/EGF/ERRFI1/FBXW7/FYN/HYAL2/LILRA5/MVP/NCK2/NOX4/PTPN1/SHC1/THY1	17
GO:0032611	interleukin-1 beta production	18/1842	93/17913	0.00607526	0.0313396	0.0215674	APOA1/APP/EGR1/ERRFI1/F2R/F2RL1/GSDMD/IFI16/IGF1/JAK2/LILRA5/S1PR3/SERPINB1/SIRPA/SMAD3/SUCNR1/TYROBP/ZC3H12A	18
GO:0044070	regulation of anion transport	18/1842	93/17913	0.00607526	0.0313396	0.0215674	ACE2/AGT/AGTR2/AKT1/APOA1/APOE/ATP1A2/CEBPB/EDN1/LEP/OSR1/PLA2R1/PRKCD/RGS2/RGS4/SFRP4/SNCA/THBS1	18
GO:0006165	nucleoside diphosphate phosphorylation	23/1842	129/17913	0.00609111	0.0313396	0.0215674	ALDOA/ALDOC/BPGM/DDIT4/ENO1/ENO3/GALK1/GPI/HDAC4/IGF1/LDHA/NME1/NUP188/NUP214/NUPR1/PFKL/PFKM/PGAM2/POM121C/PRKAG2/STAT3/SUCLG1/TP53	23
GO:1904892	regulation of STAT cascade	23/1842	129/17913	0.00609111	0.0313396	0.0215674	AGT/BCL3/CRLF1/CYP1B1/EGF/F2R/FYN/HCLS1/HGS/IGF1/IL6/INPP5F/JAK2/LEP/LYN/MIR221/PECAM1/PPP2CA/SOCS1/SOCS2/STAT3/TNFRSF1A/TSLP	23
GO:0090303	positive regulation of wound healing	13/1842	59/17913	0.00609498	0.0313396	0.0215674	CXCR4/F2R/HBEGF/HRAS/MIR221/MIR451A/MIR590/PLEK/SERPINE1/SMOC2/SOX15/THBS1/XBP1	13
GO:0090342	regulation of cell aging	13/1842	59/17913	0.00609498	0.0313396	0.0215674	BCL6/KRAS/LMNA/MAP3K3/MIR590/NAMPT/NUAK1/PLK2/TERF2/TP53/VASH1/YPEL3/ZMPSTE24	13
GO:0061028	establishment of endothelial barrier	10/1842	40/17913	0.00610635	0.0313396	0.0215674	CTNNB1/F2RL1/FASN/MSN/PDE4D/RAPGEF1/S1PR3/SOX18/TJP1/TNFRSF1A	10
GO:0010259	multicellular organism aging	9/1842	34/17913	0.00611337	0.0313396	0.0215674	COMP/CRYAB/EDN1/HYAL2/LEP/NDUFS6/RNF165/TP53/ZMPSTE24	9
GO:0071868	cellular response to monoamine stimulus	9/1842	34/17913	0.00611337	0.0313396	0.0215674	ADCY6/APP/ATP2B4/ID1/NR4A3/PDE4D/RYR2/SIN3A/SNCA	9
GO:0071870	cellular response to catecholamine stimulus	9/1842	34/17913	0.00611337	0.0313396	0.0215674	ADCY6/APP/ATP2B4/ID1/NR4A3/PDE4D/RYR2/SIN3A/SNCA	9
GO:0097484	dendrite extension	9/1842	34/17913	0.00611337	0.0313396	0.0215674	AUTS2/BCL11A/CPNE5/CXCR4/CYFIP1/SH3GL2/SLC9A6/SMURF1/SYT17	9
GO:0046651	lymphocyte proliferation	38/1842	244/17913	0.00618943	0.0317021	0.0218169	AIF1/BCL2/BCL6/CASP3/CD209/CDKN1A/CEBPB/CORO1A/CTNNB1/DLG5/DOCK2/FYN/GJA1/GPNMB/HAVCR2/HLA-DPB1/IGF1/IL6/LEP/LGALS3/LRRC32/MEF2C/MSN/NCK2/PDE5A/PIK3CG/PRKCD/PRKCQ/RAC2/SH3RF1/SLC39A10/SOS1/STAT5B/TFRC/TGFB1/TP53/TYROBP/VSIG4	38
GO:0032368	regulation of lipid transport	22/1842	122/17913	0.00628533	0.0321655	0.0221358	AGT/AGTR1/AGTR2/AKT1/ANXA2/APOA1/APOE/C1QTNF1/EDN1/EGF/KDM5B/LEP/LIPG/NFKBIA/PLA2R1/PLTP/PRKCD/PTPN11/RETN/SCP2/SPP1/THBS1	22
GO:0043901	negative regulation of multi-organism process	30/1842	182/17913	0.00631291	0.0322787	0.0222137	ANXA2/ARHGDIB/BST2/CTSG/FCN1/FCN3/GSN/HAVCR2/HTRA1/IFI16/IFIT1/IFITM1/IFITM2/IFITM3/IGF1/INPP5K/ISG20/JUN/MIR221/PROX1/TIMP1/TNIP1/TRAF3IP1/TRIB1/TRIM27/TRIM35/TRIM8/ZC3H12A/ZFP36/ZNF639	30
GO:0010517	regulation of phospholipase activity	14/1842	66/17913	0.00644251	0.0329129	0.0226501	AGT/AGTR1/ARL1/BICD1/EDNRA/ESR1/GNA15/GNAQ/HRAS/PDGFRA/PDGFRB/PLA2R1/RGS2/SNCA	14
GO:0034767	positive regulation of ion transmembrane transport	26/1842	152/17913	0.00649873	0.033143	0.0228085	ACTN2/AGT/ATP1B1/ATP1B3/CACNA2D1/CACNB2/CALM2/CASQ1/CCL2/CHCHD10/F2R/HSPA2/HTT/JPH2/KCNIP2/KCNJ2/MIR1-1/NPPA/PKD2/RGN/RNF207/RYR2/SNCA/TESC/THY1/WNK2	26
GO:1903707	negative regulation of hemopoiesis	26/1842	152/17913	0.00649873	0.033143	0.0228085	BCL6/C1QC/CTNNB1/FBN1/FBXW7/GATA2/GLI3/IL17D/LDB1/LYN/MAFB/MEIS1/MEIS2/MIR221/MYC/NFKBIA/NME1/NRARP/PIAS3/SFRP1/SOCS1/STAT5B/TMEM178A/TRIB1/ZC3H12A/ZFP36	26
GO:0048863	stem cell differentiation	37/1842	237/17913	0.00657414	0.0334987	0.0230532	ACE/EDN1/EDNRA/ESR1/FAM172A/FBXL17/FN1/FOXO4/FRZB/GATA2/GATA4/GATA6/KLHL12/KMT2A/LBH/LDB1/LTBP3/MEF2C/MSX1/MYOCD/NKX2-5/OCIAD1/OSR1/PDGFRA/PRICKLE1/PSMA3/PSMC2/RBM24/RDH10/RUNX2/SFRP1/SOX18/STAT3/TBX5/TGFB2/TP53/YAP1	37
GO:0010876	lipid localization	53/1842	366/17913	0.00659784	0.0335818	0.0231105	ABCC1/ABCD3/ACACB/ACE/ACSL3/AGT/AGTR1/AGTR2/AKR1C1/AKT1/ANXA2/APOA1/APOE/APOLD1/APOO/AQP9/ATP8B1/BSCL2/C1QTNF1/CEL/CPT1B/DGAT1/EDN1/EGF/FBXW7/FITM1/IL6/KDM5B/LDLR/LEP/LIPG/LRP10/NFKBIA/NPC1/OSBPL2/PLA2G2A/PLA2R1/PLIN5/PLTP/PRKAG2/PRKCD/PTPN11/RETN/SCP2/SERPINA5/SLC25A20/SLCO2A1/SPP1/STAT5B/THBS1/TMEM30B/TNFAIP8L3/ZC3H12A	53
GO:0006109	regulation of carbohydrate metabolic process	32/1842	198/17913	0.00661008	0.0335818	0.0231105	ACACB/AKT1/C1QTNF1/DDIT4/EGF/EP300/FOXO1/GSK3B/HDAC4/IGF1/IGFBP3/IGFBP4/IGFBP5/INPP5K/LEP/LEPR/MIDN/MLYCD/NUP188/NUP214/NUPR1/PDK4/PLEK/POM121C/PRKAG2/RGN/SNCA/SORBS1/STAT3/TGFB1/TP53/ZMPSTE24	32
GO:0030282	bone mineralization	20/1842	108/17913	0.00661314	0.0335818	0.0231105	ANKH/COMP/EIF2AK3/FGR/GJA1/GPNMB/IGF1/KLF10/LEP/MEF2C/MGP/OMD/OSR1/SLC8A1/SMAD3/SRGN/TGFB1/TGFB3/TMEM38B/ZMPSTE24	20
GO:0032612	interleukin-1 production	20/1842	108/17913	0.00661314	0.0335818	0.0231105	APOA1/APP/EGR1/ERRFI1/F2R/F2RL1/GSDMD/HAVCR2/IFI16/IGF1/JAK2/LILRA5/S100A13/S1PR3/SERPINB1/SIRPA/SMAD3/SUCNR1/TYROBP/ZC3H12A	20
GO:1901292	nucleoside phosphate catabolic process	29/1842	175/17913	0.00664757	0.0337231	0.0232077	ACAT1/ALDOA/ALDOC/BPGM/DDIT4/ENO1/ENO3/GALK1/GPI/HDAC4/IGF1/LDHA/MLYCD/NT5C2/NTHL1/NUDT9/NUP188/NUP214/NUPR1/PDE4D/PDE5A/PDE7A/PFKL/PFKM/PGAM2/POM121C/PRKAG2/STAT3/TP53	29
GO:0007249	I-kappaB kinase/NF-kappaB signaling	39/1842	253/17913	0.00665236	0.0337231	0.0232077	AJUBA/AKT1/BCL3/BIRC3/BST2/CANT1/CD14/CTNNB1/ERC1/ESR1/F2R/F2RL1/FYN/GJA1/LITAF/LTBR/LY96/MAP3K3/MIB2/NDFIP2/NFKBIA/NKIRAS1/OTUD7B/PLK2/RELA/RHOA/ROR1/S100A12/S100A13/SIRPA/SLC44A2/TIFA/TMEM9B/TNFRSF1A/TNIP1/TRIM8/USP10/ZC3H12A/ZMYND11	39
GO:0072384	organelle transport along microtubule	15/1842	73/17913	0.00666818	0.0337456	0.0232232	AP3M2/BICD1/CLN3/DTNBP1/FYCO1/HTT/KIF13A/KIF3B/KIF3C/MAP1B/MAP2/OPA1/RHOT1/TRAK2/UCHL1	15
GO:1905037	autophagosome organization	15/1842	73/17913	0.00666818	0.0337456	0.0232232	ATG13/ATG3/ATP13A2/BAG3/LRSAM1/MFN2/MTMR3/NUPR1/SMCR8/SMURF1/TMEM41B/UBQLN2/ULK1/WDR45B/WIPI1	15
GO:0060055	angiogenesis involved in wound healing	7/1842	23/17913	0.0066906	0.0338301	0.0232813	CXCR4/GPR4/MCAM/MIR451A/SERPINE1/SMOC2/XBP1	7
GO:0030041	actin filament polymerization	25/1842	145/17913	0.00678712	0.0342888	0.023597	AIF1/ARPC1B/ARPC3/CCL11/CORO1A/CYFIP1/DIAPH1/FAM107A/FCHSD2/FHOD3/GSN/HCK/HCLS1/IQGAP2/JAK2/LMOD2/NCK2/PLEKHG2/PRKCD/RHOA/SLIT2/SPTAN1/SPTBN1/TRIM27/WAS	25
GO:0060021	roof of mouth development	17/1842	87/17913	0.00683477	0.0345002	0.0237425	ARID5B/FZD2/GLI3/LRRC32/MEF2C/MSX1/OSR1/PAK1IP1/PDGFRA/PRRX1/SGPL1/SKI/SOS1/TGFB2/TGFB3/TGFBR3/TIPARP	17
GO:0001649	osteoblast differentiation	35/1842	222/17913	0.00691343	0.0348675	0.0239952	AKT1/ALPL/CEBPB/CEBPD/CLIC1/CTHRC1/CTNNB1/FASN/GDF10/GJA1/GLI3/GPNMB/HDAC4/HSD17B4/ID1/ID3/IFITM1/IGF1/IGFBP3/IGFBP5/IL6/JUNB/LRP5/MEF2C/PENK/PSMC2/RANBP3L/RRBP1/RUNX2/SFRP1/SKI/SMAD3/SNRNP200/TNC/WWTR1	35
GO:0072330	monocarboxylic acid biosynthetic process	47/1842	318/17913	0.0069657	0.0351012	0.0241561	ABCD3/ACACB/ACADVL/ACOT8/ACOX2/ACSL3/ACSS2/ALDH1A3/ALDOA/ALDOC/ALOX5/ALOX5AP/BPGM/DDIT4/EDN1/EDN2/ENO1/ENO3/FASN/GALK1/GPI/GSTM4/HDAC4/HSD17B4/IGF1/LDHA/MLYCD/NDUFAB1/NUP188/NUP214/NUPR1/OSBPL2/PDK4/PFKL/PFKM/PGAM2/POM121C/PRKAG2/PROX1/RDH10/RGN/SCD/SCP2/STAT3/TBXAS1/TP53/XBP1	47
GO:0008206	bile acid metabolic process	11/1842	47/17913	0.00701633	0.0352364	0.0242491	ACAA1/ACOT8/ACOX2/AKR1C1/ATP8B1/HSD17B4/LEP/NPC1/OSBPL2/PROX1/SCP2	11
GO:0042743	hydrogen peroxide metabolic process	11/1842	47/17913	0.00701633	0.0352364	0.0242491	CYBA/CYBB/FYN/MAOB/MMP3/NNT/PXDN/PXDNL/RAC2/SNCA/STAT3	11
GO:0048168	regulation of neuronal synaptic plasticity	11/1842	47/17913	0.00701633	0.0352364	0.0242491	AGT/APOE/APP/CAMK2A/DBN1/HRAS/KRAS/RAB3A/SNCA/SYNPO/UNC13B	11
GO:0061383	trabecula morphogenesis	11/1842	47/17913	0.00701633	0.0352364	0.0242491	BMP10/CAV3/HEG1/HEY2/MMP2/NKX2-5/RHOA/SFRP1/SOS1/TGFB2/TGFBR3	11
GO:0051402	neuron apoptotic process	37/1842	238/17913	0.00703454	0.0352979	0.0242914	AIFM1/APP/AXL/BACE1/BCL2/BNIP3/BTG2/CASP3/CCL2/CEBPB/CLN3/CORO1A/CRLF1/CTNNB1/DDIT3/F2R/FBXW7/FYN/HDAC4/HIPK2/HRAS/JAK2/JUN/KRAS/MECP2/MEF2C/NR4A3/NUPR1/PIK3CA/RHOA/SNCA/TGFB2/TGFB3/TP53/TYROBP/UNC5B/USP53	37
GO:0006913	nucleocytoplasmic transport	45/1842	302/17913	0.0070472	0.0353315	0.0243146	AGT/AGTR2/AKT1/BAG3/CDKN1A/DHX38/DUSP16/EIF4ENIF1/GLI3/GSK3B/HCLS1/HDAC3/HYAL2/IPO5/IPO9/LEP/LMNA/MDFIC/NFKBIA/NUP188/NUP214/NUP62CL/PKIG/POM121C/PRICKLE1/PRKCD/PTPN11/PTPN14/RANGAP1/SMAD3/SMG6/SMURF1/SNRPB/STAT3/STRADB/SUPT6H/TGFB1/THOC7/TP53/UBR5/UPF1/XPO4/XPO6/XPO7/ZC3H12A	45
GO:0006940	regulation of smooth muscle contraction	13/1842	60/17913	0.00706547	0.0353469	0.0243251	ATP1A2/CALCRL/CNN1/DAPK3/DOCK4/EDN1/EDN2/F2R/MYOCD/PLCE1/RGS2/RHOA/TNNI3	13
GO:1902686	mitochondrial outer membrane permeabilization involved in programmed cell death	13/1842	60/17913	0.00706547	0.0353469	0.0243251	ACAA2/BCL2/BNIP3/CHCHD10/GSK3B/MIR29A/RHOT1/SPG7/TP53/TP53BP2/YWHAG/YWHAH/YWHAQ	13
GO:0044344	cellular response to fibroblast growth factor stimulus	24/1842	138/17913	0.00707415	0.0353469	0.0243251	CBL/CCL2/CD44/CTNNB1/FAT4/FGF12/FGF18/FGF7/HYAL2/KDM5B/MIR1-1/POLR2A/POSTN/PTPN11/RUNX2/SFRP1/SHOC2/SMOC2/SNCA/SPRED2/SULF1/SULF2/THBS1/ZFP36	24
GO:0046546	development of primary male sexual characteristics	24/1842	138/17913	0.00707415	0.0353469	0.0243251	AGO4/AR/ARID5B/BCL2/CBL/CCND1/ESR1/GATA4/GATA6/GJA1/HMGB2/HSD17B4/LHFPL2/MAMLD1/MGST1/NUPR1/PDGFRA/PDGFRB/SFRP1/SGPL1/SOX15/TBC1D20/TESC/TGFB2	24
GO:0050890	cognition	43/1842	286/17913	0.0071007	0.0354496	0.0243958	ADCY3/AGT/APOE/APP/ATAD1/ATP1A2/ATXN1L/BRSK1/BTG2/CASP3/CEBPB/CIC/CLN3/CYFIP1/DEAF1/EP300/FAM107A/FOS/FYN/GATM/GPR155/HTT/ITGA5/ITGB1/ITPR3/JUN/KALRN/KCNAB1/KRAS/LDLR/MAP1A/MECP2/MEF2C/MEIS2/MME/NLGN4X/NPTX2/PICALM/PLK2/SERPINF1/SYNPO/VDAC1/VDAC3	43
GO:0032273	positive regulation of protein polymerization	21/1842	116/17913	0.00714542	0.0356128	0.0245082	ARPC1B/ARPC3/CAV3/CCL11/CORO1A/CYFIP1/DCTN1/FCHSD2/FES/GSN/HCK/IQGAP2/LMOD2/MAP1B/MECP2/NAV3/NCK2/NUMA1/RHOA/TRIM27/WAS	21
GO:0034219	carbohydrate transmembrane transport	21/1842	116/17913	0.00714542	0.0356128	0.0245082	AKT1/BRAF/CLIP3/EDN1/EDNRA/GRB10/IGF1/INPP5K/LEP/NR4A3/PID1/PRKAG2/PTPN11/RHOQ/SLC17A5/SLC2A1/SLC2A12/SLC2A3/SLC5A1/SORBS1/SORT1	21
GO:0014819	regulation of skeletal muscle contraction	5/1842	13/17913	0.00725597	0.0357426	0.0245975	CASQ1/CAV3/DMPK/KCNJ2/MYH7	5
GO:0030299	intestinal cholesterol absorption	5/1842	13/17913	0.00725597	0.0357426	0.0245975	AKR1C1/APOA1/CEL/LDLR/LEP	5
GO:0042574	retinal metabolic process	5/1842	13/17913	0.00725597	0.0357426	0.0245975	AKR1C1/ALDH1A3/BCO2/CYP1B1/RDH10	5
GO:0043568	positive regulation of insulin-like growth factor receptor signaling pathway	5/1842	13/17913	0.00725597	0.0357426	0.0245975	AR/IGF1/IGFBP3/IGFBP4/IGFBP5	5
GO:0051386	regulation of neurotrophin TRK receptor signaling pathway	5/1842	13/17913	0.00725597	0.0357426	0.0245975	AGT/AGTR2/CYFIP1/DOK5/SLC9A6	5
GO:0055070	copper ion homeostasis	5/1842	13/17913	0.00725597	0.0357426	0.0245975	APP/ATP7A/MT2A/SCO1/SCO2	5
GO:0060347	heart trabecula formation	5/1842	13/17913	0.00725597	0.0357426	0.0245975	BMP10/CAV3/HEY2/NKX2-5/TGFBR3	5
GO:0060397	JAK-STAT cascade involved in growth hormone signaling pathway	5/1842	13/17913	0.00725597	0.0357426	0.0245975	JAK2/LYN/PTPN1/STAT3/STAT5B	5
GO:0060452	positive regulation of cardiac muscle contraction	5/1842	13/17913	0.00725597	0.0357426	0.0245975	ACE2/MIR1-1/NPPA/RGS2/RNF207	5
GO:0061469	regulation of type B pancreatic cell proliferation	5/1842	13/17913	0.00725597	0.0357426	0.0245975	ERRFI1/NR4A3/NUPR1/SFRP1/SGPP2	5
GO:0071850	mitotic cell cycle arrest	5/1842	13/17913	0.00725597	0.0357426	0.0245975	CDKN1A/DUSP1/FAP/GADD45A/TP53	5
GO:0098903	regulation of membrane repolarization during action potential	5/1842	13/17913	0.00725597	0.0357426	0.0245975	CACNA2D1/MIR1-1/MIR133A1/MIR133A2/RNF207	5
GO:1903025	regulation of RNA polymerase II regulatory region sequence-specific DNA binding	5/1842	13/17913	0.00725597	0.0357426	0.0245975	DDIT3/EP300/FBXW7/NSD1/ZMPSTE24	5
GO:1903960	negative regulation of anion transmembrane transport	5/1842	13/17913	0.00725597	0.0357426	0.0245975	AKT1/OSR1/RGS2/RGS4/THBS1	5
GO:0006882	cellular zinc ion homeostasis	6/1842	18/17913	0.00732112	0.0358364	0.0246621	ATP13A2/S100A8/S100A9/SLC30A1/SLC30A2/SLC30A3	6
GO:0060749	mammary gland alveolus development	6/1842	18/17913	0.00732112	0.0358364	0.0246621	AR/CCND1/DDR1/EGF/ESR1/SOCS2	6
GO:0061377	mammary gland lobule development	6/1842	18/17913	0.00732112	0.0358364	0.0246621	AR/CCND1/DDR1/EGF/ESR1/SOCS2	6
GO:0090196	regulation of chemokine secretion	6/1842	18/17913	0.00732112	0.0358364	0.0246621	AIF1/F2RL1/IL1RL1/MBP/MIR590/POSTN	6
GO:0090330	regulation of platelet aggregation	6/1842	18/17913	0.00732112	0.0358364	0.0246621	C1QTNF1/CD9/LYN/PRKCD/PRKCQ/SERPINE2	6
GO:0051249	regulation of lymphocyte activation	57/1842	401/17913	0.00733117	0.0358364	0.0246621	AIF1/AKT1/AXL/BCL2/BCL6/CASP3/CCL2/CD209/CDKN1A/CEBPB/CORO1A/CTNNB1/CYLD/DLG5/FYN/GLI3/GPNMB/GSN/HAVCR2/HLA-DPB1/IGF1/IL6/LEP/LGALS3/LRRC32/LYN/MAP3K8/MEF2C/MLH1/NCK2/NFKBIZ/NRARP/PAG1/PDCD1/PDE5A/PIK3CA/PIK3R6/PRKCQ/PTPN11/RAC2/RHOA/SFRP1/SH3RF1/SLC39A10/SOCS1/SOS1/STAT5B/SUPT6H/TFRC/TGFB1/THY1/TYROBP/VSIG4/XBP1/ZC3H12A/ZEB1/ZMIZ1	57
GO:0002888	positive regulation of myeloid leukocyte mediated immunity	8/1842	29/17913	0.00733319	0.0358364	0.0246621	F2RL1/FCER1G/FGR/GAB2/GATA2/ITGB2/NPPA/VAMP8	8
GO:0045980	negative regulation of nucleotide metabolic process	8/1842	29/17913	0.00733319	0.0358364	0.0246621	DDIT4/HDAC4/NUPR1/PID1/RHOA/SNCA/STAT3/TP53	8
GO:0048873	homeostasis of number of cells within a tissue	8/1842	29/17913	0.00733319	0.0358364	0.0246621	BCL2/CORO1A/F2R/FH/GATA2/KRAS/NOS3/PTPN11	8
GO:0010677	negative regulation of cellular carbohydrate metabolic process	10/1842	41/17913	0.00734765	0.0358364	0.0246621	DDIT4/EP300/GSK3B/HDAC4/INPP5K/LEPR/MIDN/NUPR1/PLEK/STAT3	10
GO:0090278	negative regulation of peptide hormone secretion	10/1842	41/17913	0.00734765	0.0358364	0.0246621	BMP8A/KALRN/LEP/MAP4K4/MIDN/NDUFAF2/PFKL/PTPN11/SFRP1/VSNL1	10
GO:1903146	regulation of autophagy of mitochondrion	10/1842	41/17913	0.00734765	0.0358364	0.0246621	ATP13A2/BNIP3/CAMKK2/DNM1L/FBXW7/HTT/MFN2/SMURF1/TP53/VDAC1	10
GO:0046939	nucleotide phosphorylation	23/1842	131/17913	0.00735631	0.0358415	0.0246656	ALDOA/ALDOC/BPGM/DDIT4/ENO1/ENO3/GALK1/GPI/HDAC4/IGF1/LDHA/NME1/NUP188/NUP214/NUPR1/PFKL/PFKM/PGAM2/POM121C/PRKAG2/STAT3/SUCLG1/TP53	23
GO:0046394	carboxylic acid biosynthetic process	60/1842	426/17913	0.0073608	0.0358415	0.0246656	ABCC5/ABCD3/ACACB/ACADVL/ACOT8/ACOX2/ACSL3/ACSS2/ALDH1A3/ALDOA/ALDOC/ALOX5/ALOX5AP/ATP2B4/BCAT2/BPGM/DDIT4/EDN1/EDN2/EGF/ENO1/ENO3/FASN/GALK1/GATM/GOT1/GPI/GPT/GSTM4/HAAO/HDAC4/HSD17B4/IGF1/LDHA/MLYCD/NDUFAB1/NUP188/NUP214/NUPR1/OSBPL2/PDK4/PFKL/PFKM/PGAM2/PHGDH/POM121C/PRKAG2/PROX1/RDH10/RGN/SCD/SCP2/SERINC3/SHMT2/STAT3/SUCLA2/TBXAS1/TGFB1/TP53/XBP1	60
GO:0007409	axonogenesis	56/1842	393/17913	0.00743674	0.0361815	0.0248996	APBB2/APOE/APP/ARHGAP35/ARHGDIA/AUTS2/BCL2/BOC/BRSK1/CDH11/CHN1/CXCR4/CYFIP1/DOK5/DOK6/ENAH/EXT1/FN1/FYN/GAB2/GLI3/GRB10/GSK3B/ITGB1/KIF13B/LAMA2/MAP1B/MAP2/MAP2K1/MATN2/MYOT/NR4A3/PICALM/PIK3CA/PRKCQ/PTPN11/PTPRA/RAP1GAP/RHOA/RTN4/SH3KBP1/SHC1/SIPA1L1/SKIL/SLC9A6/SLIT2/SOS1/SPP1/SPTAN1/SPTBN1/THY1/TRAK2/UCHL1/ULK2/UNC5B/VCL	56
GO:0007050	cell cycle arrest	36/1842	231/17913	0.00747446	0.0362954	0.0249779	APBB2/BTG2/CCND1/CDKN1A/CDKN1C/DDIT3/DUSP1/EP300/FAP/FOXO4/GADD45A/GAS7/GATA6/HRAS/IRF6/MAP2K1/MAPK12/MED25/MLF1/MYC/NOTCH2/PKD2/PLK2/PPP1R9B/PPP2R3B/PRKAG2/SKIL/SMAD3/SOX4/STRADB/TGFB1/TGFB2/THBS1/TP53/VASH1/ZFHX3	36
GO:0010594	regulation of endothelial cell migration	36/1842	231/17913	0.00747446	0.0362954	0.0249779	ADAMTS9/AGT/AGTR2/AKT1/AMOTL1/APOE/BMP10/EDN1/FBXW7/FGF18/GATA2/GPI/KLF4/MAP2K5/MAP3K3/MECP2/MEF2C/MIR20A/MIR221/MIR29A/MMRN2/NOS3/PLK2/PROX1/RHOA/SASH1/SERPINF1/SLIT2/SMOC2/SP1/SPARC/STARD13/TGFB1/THBS1/VASH1/ZC3H12A	36
GO:0071402	cellular response to lipoprotein particle stimulus	9/1842	35/17913	0.00749377	0.0362954	0.0249779	AKT1/APOE/CD68/CD9/FCER1G/ITGB1/ITGB2/LDLR/NPC1	9
GO:0090322	regulation of superoxide metabolic process	9/1842	35/17913	0.00749377	0.0362954	0.0249779	AATF/AGT/CYBA/F2RL1/ITGB2/PRKCD/RGN/TGFB1/TYROBP	9
GO:0031623	receptor internalization	19/1842	102/17913	0.00749692	0.0362954	0.0249779	ANKRD13A/ATAD1/CALCRL/CAV3/CD9/EGF/FCER1G/FMR1/ITGB1/ITGB2/PICALM/RAMP1/SFRP4/SH3GL2/SNCA/SNX1/TFRC/UBQLN2/USP46	19
GO:0032963	collagen metabolic process	19/1842	102/17913	0.00749692	0.0362954	0.0249779	CTSB/CTSK/EMILIN1/ERRFI1/F2R/FAP/GOT1/ID1/IL6/ITGB1/MFAP4/MIR29A/MMP15/MMP2/MMP3/PDGFRB/SERPINH1/TGFB1/TGFB3	19
GO:0022408	negative regulation of cell-cell adhesion	28/1842	169/17913	0.00758197	0.0366772	0.0252406	AKT1/APOA1/BCL6/C1QTNF1/CASP3/CD9/CEBPB/DLG5/GLI3/GPNMB/HAVCR2/JAK2/KLF4/LGALS3/LRRC32/MAP2K5/MBP/MIR221/NRARP/PDE5A/PPM1F/PRKCD/SERPINE2/SOCS1/SWAP70/TGFB1/VSIG4/ZC3H12A	28
GO:0007589	body fluid secretion	18/1842	95/17913	0.00761551	0.0368093	0.0253316	ANXA2/ATP7A/CCND1/CEL/COPA/CYBA/DDR1/EDN1/GJA1/KALRN/NME1/NPPB/NPR3/SLC4A5/SOCS2/STAT5B/VAMP8/XBP1	18
GO:0042177	negative regulation of protein catabolic process	22/1842	124/17913	0.00762919	0.0368454	0.0253564	ANXA2/ATP13A2/AZIN1/BAG5/CCAR2/FHIT/FYN/HIPK2/IRAK3/LAPTM4B/MAP1A/PTPN3/RELA/RILP/SCO1/SERPINE2/SMAD3/SNCA/TAF9/TIMP1/UCHL5/USP14	22
GO:0044264	cellular polysaccharide metabolic process	17/1842	88/17913	0.00768052	0.0370084	0.0254686	AGL/AKT1/CSGALNACT2/EXT1/EXT2/GAA/GSK3B/IGF1/INPP5K/LEPR/PCDH12/PHKA2/PPP1R1A/PPP1R3C/PRKAG2/PYGB/SORBS1	17
GO:1904894	positive regulation of STAT cascade	17/1842	88/17913	0.00768052	0.0370084	0.0254686	AGT/CRLF1/CYP1B1/F2R/FYN/HCLS1/IGF1/IL6/JAK2/LEP/LYN/MIR221/PECAM1/SOCS1/STAT3/TNFRSF1A/TSLP	17
GO:0010823	negative regulation of mitochondrion organization	12/1842	54/17913	0.00768794	0.0370084	0.0254686	ACAA2/AKT1/BAG3/BNIP3/DNM1L/FXN/HIGD1A/IGF1/LMNA/OMA1/OPA1/TP53	12
GO:1903078	positive regulation of protein localization to plasma membrane	12/1842	54/17913	0.00768794	0.0370084	0.0254686	ACSL3/AKT1/CLIP3/CNPY4/EPHA3/ITGB1/LGALS3/NKD2/PRKCH/PTPN9/SORBS1/SPTBN1	12
GO:0031214	biomineral tissue development	26/1842	154/17913	0.00771188	0.0370634	0.0255064	ALPL/ANKH/CEBPB/COMP/EIF2AK3/FGR/FOXO1/GJA1/GPNMB/HEY2/IGF1/KLF10/LEP/MEF2C/MGP/NOS3/OMD/OSR1/SLC8A1/SMAD3/SPP1/SRGN/TGFB1/TGFB3/TMEM38B/ZMPSTE24	26
GO:0045931	positive regulation of mitotic cell cycle	26/1842	154/17913	0.00771188	0.0370634	0.0255064	AIF1/AKT1/APP/CCND1/CCND2/EDN1/EGF/HSPA2/IGF1/KCNA5/LRP5/LSM10/MECP2/MEIS2/MIR221/MIR29A/MIR590/NDC80/NUMA1/PDGFRB/PTPN11/SIN3A/SMOC2/STAT5B/TGFB1/USP22	26
GO:0016053	organic acid biosynthetic process	60/1842	427/17913	0.00773001	0.0371057	0.0255355	ABCC5/ABCD3/ACACB/ACADVL/ACOT8/ACOX2/ACSL3/ACSS2/ALDH1A3/ALDOA/ALDOC/ALOX5/ALOX5AP/ATP2B4/BCAT2/BPGM/DDIT4/EDN1/EDN2/EGF/ENO1/ENO3/FASN/GALK1/GATM/GOT1/GPI/GPT/GSTM4/HAAO/HDAC4/HSD17B4/IGF1/LDHA/MLYCD/NDUFAB1/NUP188/NUP214/NUPR1/OSBPL2/PDK4/PFKL/PFKM/PGAM2/PHGDH/POM121C/PRKAG2/PROX1/RDH10/RGN/SCD/SCP2/SERINC3/SHMT2/STAT3/SUCLA2/TBXAS1/TGFB1/TP53/XBP1	60
GO:0032675	regulation of interleukin-6 production	24/1842	139/17913	0.00773948	0.0371057	0.0255355	AIF1/APP/ARHGEF2/CEBPB/CYBA/F2R/F2RL1/FCER1G/HAVCR2/HYAL2/IL17D/IL6/IRAK3/KLF2/LILRA5/MBP/PTPN11/SIRPA/STAT3/SYT11/TSLP/TYROBP/XBP1/ZC3H12A	24
GO:0050773	regulation of dendrite development	24/1842	139/17913	0.00773948	0.0371057	0.0255355	APOE/BCL11A/CAMSAP2/CUL7/CUX1/CYFIP1/DBN1/DLG5/DNM1L/FMR1/GSK3B/ID1/KALRN/MEF2C/OPA1/PDLIM5/PLK2/PTPRD/RAP2A/RHOA/RTN4IP1/SIPA1L1/SRGAP2C/YWHAH	24
GO:0016525	negative regulation of angiogenesis	29/1842	177/17913	0.0077865	0.0373009	0.0256698	ADAMTS9/AGT/COL4A2/CTNNB1/EMILIN1/FOXO4/GPR4/HGS/HSPG2/KLF2/KLF4/MAP2K5/MECP2/MIR20A/MIR221/MIR29A/MMRN2/NPPB/PLK2/RHOA/SERPINE1/SERPINF1/SPARC/STARD13/SULF1/TGFB2/THBS1/THBS4/VASH1	29
GO:0001952	regulation of cell-matrix adhesion	21/1842	117/17913	0.00788728	0.0377531	0.0259811	BCL2/BCL6/COL16A1/DAPK3/EPHA3/FAM107A/GSK3B/LDB1/MAP4K4/PEAK1/PHLDB2/PLAU/POSTN/PPM1F/RHOA/S100A10/SERPINE1/SFRP1/SMAD3/THBS1/THY1	21
GO:0050714	positive regulation of protein secretion	39/1842	256/17913	0.00807453	0.0386181	0.0265764	AGTR2/AIF1/ANKRD1/ANO1/ATP13A2/CD14/DNM1L/F2R/F2RL1/FCN1/FGR/GJA1/GPI/GSDMD/HAVCR2/HYAL2/IGF1/IL1RL1/IL6/JAK2/KARS/LILRA5/MBP/MPC2/MYOM1/NADK/OXCT1/POSTN/PPID/SOX4/SPTBN1/TGFB1/TGFB2/TGFB3/TSLP/TTN/UNC13B/VSNL1/XBP1	39
GO:0006027	glycosaminoglycan catabolic process	13/1842	61/17913	0.00815429	0.0388428	0.026731	AGRN/CD44/FMOD/GLB1/GPC6/HSPG2/HYAL2/IDUA/LUM/LYVE1/OMD/PRELP/TGFB1	13
GO:0033627	cell adhesion mediated by integrin	13/1842	61/17913	0.00815429	0.0388428	0.026731	COL16A1/CYP1B1/FBN1/ITGA5/ITGB1/LYN/PIK3CG/PLAU/PTPN11/SERPINE1/SWAP70/TESC/TGFB2	13
GO:0043388	positive regulation of DNA binding	13/1842	61/17913	0.00815429	0.0388428	0.026731	CALM2/CTNNB1/EGF/EP300/HIPK2/HMGB2/IGF1/JAK2/KLF4/MYOCD/NME1/SKI/TGFB1	13
GO:0046888	negative regulation of hormone secretion	13/1842	61/17913	0.00815429	0.0388428	0.026731	BMP8A/EDN1/KALRN/LEP/MAP4K4/MIDN/NDUFAF2/PFKL/PTPN11/RAB11FIP3/RAB11FIP5/SFRP1/VSNL1	13
GO:1904377	positive regulation of protein localization to cell periphery	13/1842	61/17913	0.00815429	0.0388428	0.026731	ACSL3/AKT1/CLIP3/CNPY4/EPHA3/ITGB1/LGALS3/NKD2/NUMA1/PRKCH/PTPN9/SORBS1/SPTBN1	13
GO:0070507	regulation of microtubule cytoskeleton organization	28/1842	170/17913	0.00821118	0.0390823	0.0268958	ARHGEF2/BICD1/CAMSAP2/CAV3/CLIP3/CTNNB1/CYLD/DCTN1/DIXDC1/EPHA3/FAM107A/FES/FKBP4/GSK3B/MAP1B/MAP2/MECP2/NAV3/NUMA1/PHLDB1/PHLDB2/PLK2/RHOA/RNF4/SMC1A/SNCA/TMEM67/TRAF3IP1	28
GO:0045665	negative regulation of neuron differentiation	32/1842	201/17913	0.00824303	0.0392024	0.0269784	ADCY6/APOE/APP/ARHGDIA/BAG5/BCL11A/DIXDC1/DPYSL3/EIF4ENIF1/FKBP4/GLI3/GSK3B/ID1/INPP5F/IRX3/MAP2/MAP4K4/MEIS1/PLK2/PTPN9/RAP1GAP2/RGMA/RHOA/RTN4/SLIT2/SPOCK1/SPP1/SRGAP2C/THY1/TRAK2/ULK2/YWHAH	32
GO:0031050	dsRNA processing	11/1842	48/17913	0.00827592	0.0392957	0.0270427	AGO4/DICER1/ESR1/MAP2K1/MAP2K2/PRKRA/SMAD3/TGFB1/TP53/ZC3H12A/ZMPSTE24	11
GO:0070918	production of small RNA involved in gene silencing by RNA	11/1842	48/17913	0.00827592	0.0392957	0.0270427	AGO4/DICER1/ESR1/MAP2K1/MAP2K2/PRKRA/SMAD3/TGFB1/TP53/ZC3H12A/ZMPSTE24	11
GO:0032640	tumor necrosis factor production	26/1842	155/17913	0.00838488	0.0397493	0.0273548	APP/ARHGEF2/AXL/BCL3/CD14/CYBA/CYBB/DICER1/ERRFI1/FCER1G/GPNMB/HAVCR2/IGF1/IRAK3/JAK2/LEP/LILRA5/LY96/PTPN11/SIRPA/SYT11/THBS1/TRIM27/TYROBP/ZC3H12A/ZFP36	26
GO:1903555	regulation of tumor necrosis factor superfamily cytokine production	26/1842	155/17913	0.00838488	0.0397493	0.0273548	APP/ARHGEF2/AXL/BCL3/CD14/CYBA/CYBB/DICER1/ERRFI1/FCER1G/GPNMB/HAVCR2/IGF1/IRAK3/JAK2/LEP/LILRA5/LY96/PTPN11/SIRPA/SYT11/THBS1/TRIM27/TYROBP/ZC3H12A/ZFP36	26
GO:0051169	nuclear transport	45/1842	305/17913	0.00839686	0.0397743	0.027372	AGT/AGTR2/AKT1/BAG3/CDKN1A/DHX38/DUSP16/EIF4ENIF1/GLI3/GSK3B/HCLS1/HDAC3/HYAL2/IPO5/IPO9/LEP/LMNA/MDFIC/NFKBIA/NUP188/NUP214/NUP62CL/PKIG/POM121C/PRICKLE1/PRKCD/PTPN11/PTPN14/RANGAP1/SMAD3/SMG6/SMURF1/SNRPB/STAT3/STRADB/SUPT6H/TGFB1/THOC7/TP53/UBR5/UPF1/XPO4/XPO6/XPO7/ZC3H12A	45
GO:0006367	transcription initiation from RNA polymerase II promoter	29/1842	178/17913	0.00841369	0.0398221	0.0274049	AR/CCND1/CDK8/CDKN1A/CREBBP/ESR1/GTF2A1/HEY2/MAML1/MAML2/MAML3/MECP2/MED25/MED7/NKX2-5/NOTCH2/NPPA/NR4A3/NRBF2/POLR2A/PPM1D/RUNX2/TAF15/TAF9/TBX5/TEAD4/TP53/WWTR1/YAP1	29
GO:0002088	lens development in camera-type eye	14/1842	68/17913	0.00844992	0.0399298	0.027479	CDKN1C/CRYAB/CTNNB1/GJA1/HIPK1/HIPK2/KDM5B/MEIS1/PROX1/SKI/SKIL/SMAD3/TBC1D20/TGFB1	14
GO:0061515	myeloid cell development	14/1842	68/17913	0.00844992	0.0399298	0.027479	ABI1/ANXA2/APP/BCL6/BPGM/EP300/FBN1/FBXW7/KLF2/LRRK1/MEIS1/NOTCH2/PTPN11/TYROBP	14
GO:0046928	regulation of neurotransmitter secretion	18/1842	96/17913	0.00849595	0.0401153	0.0276067	ATP2A2/BACE1/CACNB2/CAMK2A/DNM1L/DTNBP1/FMR1/GSK3B/KCNC4/MEF2C/PNKD/RAB3A/RHOT1/SLC30A1/SNCA/SNCAIP/SYT11/UNC13B	18
GO:0008344	adult locomotory behavior	15/1842	75/17913	0.00860654	0.0403564	0.0277726	APP/ATP1A2/FGF12/FXN/GLRB/HIPK2/INPP5F/KALRN/MECP2/NPC1/PREX2/SEZ6L/SNCA/UCHL1/ZMPSTE24	15
GO:0031100	animal organ regeneration	15/1842	75/17913	0.00860654	0.0403564	0.0277726	APOA1/AXL/CCND1/CDKN1A/CEBPB/GLI3/HAMP/LCP1/NNMT/NR4A3/PTPN3/RGN/SULF2/TGFB1/TGFBR3	15
GO:0072078	nephron tubule morphogenesis	15/1842	75/17913	0.00860654	0.0403564	0.0277726	AGT/AGTR2/BCL2/CTNNB1/DCHS1/FAT4/GLI3/GZF1/IRX2/IRX3/KLHL3/MYC/OSR1/PKD2/TGFB1	15
GO:0072332	intrinsic apoptotic signaling pathway by p53 class mediator	15/1842	75/17913	0.00860654	0.0403564	0.0277726	BCL2/BCL3/CD44/CDKN1A/DDIT4/EP300/FHIT/HIPK1/HIPK2/IFI16/MSX1/NUPR1/TAF9/TP53/TP53BP2	15
GO:0000132	establishment of mitotic spindle orientation	7/1842	24/17913	0.00862199	0.0403564	0.0277726	ARHGEF2/CENPA/DCTN1/HTT/NDC80/NDE1/NUMA1	7
GO:0003181	atrioventricular valve morphogenesis	7/1842	24/17913	0.00862199	0.0403564	0.0277726	DCHS1/GATA4/HEY2/HEYL/SOX4/TBX5/TGFB2	7
GO:0032528	microvillus organization	7/1842	24/17913	0.00862199	0.0403564	0.0277726	ATP8B1/FSCN1/GLDN/KLF5/PTPN11/RAP1GAP/RAP2A	7
GO:0032897	negative regulation of viral transcription	7/1842	24/17913	0.00862199	0.0403564	0.0277726	IFITM3/INPP5K/JUN/TRIM27/TRIM8/ZFP36/ZNF639	7
GO:0035812	renal sodium excretion	7/1842	24/17913	0.00862199	0.0403564	0.0277726	AGT/AGTR1/AGTR2/CORIN/EDN1/MLLT6/NPPB	7
GO:0043951	negative regulation of cAMP-mediated signaling	7/1842	24/17913	0.00862199	0.0403564	0.0277726	ATP2B4/CRTC3/MIR133A1/MIR133A2/PDE3A/PDE4D/RGS2	7
GO:0060343	trabecula formation	7/1842	24/17913	0.00862199	0.0403564	0.0277726	BMP10/CAV3/HEY2/MMP2/NKX2-5/SFRP1/TGFBR3	7
GO:0007260	tyrosine phosphorylation of STAT protein	16/1842	82/17913	0.00865164	0.0403994	0.0278022	CRLF1/FYN/HCLS1/IGF1/IL6/INPP5F/JAK2/LEP/LYN/MIR221/PECAM1/PPP2CA/SOCS1/STAT3/TNFRSF1A/TSLP	16
GO:0032651	regulation of interleukin-1 beta production	16/1842	82/17913	0.00865164	0.0403994	0.0278022	APOA1/APP/EGR1/ERRFI1/F2R/GSDMD/IFI16/IGF1/JAK2/LILRA5/S1PR3/SERPINB1/SIRPA/SMAD3/TYROBP/ZC3H12A	16
GO:0045445	myoblast differentiation	16/1842	82/17913	0.00865164	0.0403994	0.0278022	BOC/DDIT3/ID3/IGF1/IGFBP3/KCNAB1/MAML1/MAPK12/MEF2C/MYOCD/PRICKLE1/RANBP3L/RBM24/SMYD1/SOX15/TGFB1	16
GO:0009311	oligosaccharide metabolic process	10/1842	42/17913	0.00877505	0.0409111	0.0281543	BRAF/CTBS/GAA/GLA/IDUA/NEU3/SLC2A1/ST3GAL2/ST6GALNAC6/ST8SIA2	10
GO:0051646	mitochondrion localization	10/1842	42/17913	0.00877505	0.0409111	0.0281543	DNM1L/MAP1B/MFN1/MFN2/OPA1/PLIN5/RHOT1/SLC4A5/TRAK2/UCHL1	10
GO:0140053	mitochondrial gene expression	25/1842	148/17913	0.00880107	0.0410001	0.0282156	AARS2/CHCHD10/ELAC2/ERAL1/FASTKD2/HSD17B10/MRPL1/MRPL16/MRPL3/MRPL35/MRPL38/MRPL44/MRPL50/MRPL52/MRPS14/MRPS18A/MRPS22/MRPS31/MRPS36/MRPS9/MTIF3/MTRF1L/SHMT2/TRMT5/TSFM	25
GO:0009435	NAD biosynthetic process	12/1842	55/17913	0.00893562	0.0415942	0.0286244	ALDOA/ALDOC/BPGM/ENO1/ENO3/GPI/HAAO/NAMPT/NNMT/PFKL/PFKM/PGAM2	12
GO:0006066	alcohol metabolic process	49/1842	339/17913	0.0090382	0.0420386	0.0289303	ACAA2/ACACB/ACADVL/ACSS2/ADH1A/AKR1C1/ALDH1A3/ALDH2/APOA1/APOE/APP/ASAH1/CEL/COQ2/COQ3/CYB5R3/CYP11B1/CYP11B2/CYP1B1/DGAT1/FASN/FDX1/GALK1/GOT1/GPD2/IGF1/INPP1/INPP4B/INPP5K/IP6K1/LDLR/LEP/LEPR/MECP2/NAAA/NPC1/NUDT4/PLCE1/PLEK/PMVK/RDH10/RDH5/SCD/SGPP2/SMPD1/SNCA/SP1/SPTLC2/TM7SF2	49
GO:2000181	negative regulation of blood vessel morphogenesis	29/1842	179/17913	0.00908188	0.0422086	0.0290473	ADAMTS9/AGT/COL4A2/CTNNB1/EMILIN1/FOXO4/GPR4/HGS/HSPG2/KLF2/KLF4/MAP2K5/MECP2/MIR20A/MIR221/MIR29A/MMRN2/NPPB/PLK2/RHOA/SERPINE1/SERPINF1/SPARC/STARD13/SULF1/TGFB2/THBS1/THBS4/VASH1	29
GO:0050982	detection of mechanical stimulus	9/1842	36/17913	0.0090997	0.0422178	0.0290536	BACE1/CAV3/CSRP3/CXCR4/FYN/PKD2/SERPINE2/TCAP/TTN	9
GO:0051293	establishment of spindle localization	9/1842	36/17913	0.0090997	0.0422178	0.0290536	ARHGEF2/CENPA/DCTN1/HTT/MAP4/MYH9/NDC80/NDE1/NUMA1	9
GO:0070304	positive regulation of stress-activated protein kinase signaling cascade	26/1842	156/17913	0.00910525	0.0422178	0.0290536	APP/DVL3/EDN1/F2RL1/FGD2/GADD45A/GADD45B/GADD45G/HIPK2/HRAS/KARS/LEP/LTBR/LYN/MAP3K3/MAP3K6/MAPK8IP3/MDFIC/PTPN1/SASH1/SH3RF1/SH3RF2/SH3RF3/TGFB2/TPD52L1/ZC3H12A	26
GO:0046320	regulation of fatty acid oxidation	8/1842	30/17913	0.00911659	0.0422373	0.0290671	ACACB/ACADVL/AKT1/MLYCD/NR4A3/PDK4/PLIN5/PRKAG2	8
GO:0030010	establishment of cell polarity	22/1842	126/17913	0.00919865	0.0425842	0.0293058	ARHGEF2/BRSK1/CENPA/CYTH3/DCTN1/DOCK2/FSCN1/GSK3B/GSN/HTT/MAP1B/MAP2/MAP4/MARK3/MSN/MYH9/NDC80/NDE1/NUMA1/RHOA/WEE1/WWC1	22
GO:0009201	ribonucleoside triphosphate biosynthetic process	27/1842	164/17913	0.00937025	0.0432464	0.0297614	ALDOA/ALDOC/BPGM/DDIT4/ENO1/ENO3/GALK1/GPI/HDAC4/IGF1/LDHA/NME1/NUP188/NUP214/NUPR1/PFKL/PFKM/PGAM2/PID1/POM121C/PRKAG2/STAT3/TAZ/TGFB1/TP53/UCK1/UCK2	27
GO:0035794	positive regulation of mitochondrial membrane permeability	13/1842	62/17913	0.0093709	0.0432464	0.0297614	ACAA2/BCL2/BNIP3/CHCHD10/GSK3B/MIR29A/RHOT1/SPG7/TP53/TP53BP2/YWHAG/YWHAH/YWHAQ	13
GO:0043550	regulation of lipid kinase activity	13/1842	62/17913	0.0093709	0.0432464	0.0297614	FGR/KLF4/LYN/NRBF2/PDGFRA/PDGFRB/PIK3IP1/PIK3R6/PPP2R5A/SOCS1/SOCS2/TGFB1/TNFAIP8L3	13
GO:1901862	negative regulation of muscle tissue development	13/1842	62/17913	0.0093709	0.0432464	0.0297614	CAV3/GJA1/IGFBP5/MEIS1/MIR1-1/MIR590/MYOCD/RGS2/RGS4/SOX15/TBX5/TGFB1/TLL2	13
GO:0033135	regulation of peptidyl-serine phosphorylation	21/1842	119/17913	0.00955875	0.0440707	0.0303287	AKT1/APP/ATP2B4/BCL2/BRAF/CD44/DDIT4/GPD1L/HCLS1/HRC/IL6/INPP5F/INPP5K/NCK2/NSD1/PDE4D/PIK3CA/PPM1F/RAF1/SNCA/TGFB1	21
GO:0032635	interleukin-6 production	25/1842	149/17913	0.00957184	0.0440707	0.0303287	AIF1/APP/ARHGEF2/CEBPB/CYBA/F2R/F2RL1/FCER1G/HAVCR2/HYAL2/IL17D/IL6/IRAK3/KLF2/LEP/LILRA5/MBP/PTPN11/SIRPA/STAT3/SYT11/TSLP/TYROBP/XBP1/ZC3H12A	25
GO:0042129	regulation of T cell proliferation	25/1842	149/17913	0.00957184	0.0440707	0.0303287	AIF1/CASP3/CD209/CEBPB/CORO1A/CTNNB1/DLG5/GPNMB/HAVCR2/HLA-DPB1/IGF1/IL6/LEP/LGALS3/LRRC32/NCK2/PDE5A/PRKCQ/RAC2/SH3RF1/SOS1/STAT5B/TFRC/TGFB1/VSIG4	25
GO:0034404	nucleobase-containing small molecule biosynthetic process	33/1842	211/17913	0.00959802	0.0441254	0.0303664	ACAT1/ADK/ALDOA/ALDOC/BPGM/DDIT4/ENO1/ENO3/GALK1/GPI/HDAC4/IGF1/LDHA/MLYCD/NME1/NT5C2/NTHL1/NUDT9/NUP188/NUP214/NUPR1/PDE4D/PDE5A/PDE7A/PFKL/PFKM/PGAM2/POM121C/PRKAG2/STAT3/TP53/UCK1/UCK2	33
GO:0007163	establishment or maintenance of cell polarity	28/1842	172/17913	0.00959865	0.0441254	0.0303664	ARHGAP35/ARHGEF2/BRSK1/CDC42BPB/CENPA/CYTH3/DCTN1/DLG5/DOCK2/FAT1/FSCN1/GSK3B/GSN/HTT/LMNA/MAP1B/MAP2/MAP4/MARK3/MSN/MYH9/NDC80/NDE1/NUMA1/PARVA/RHOA/WEE1/WWC1	28
GO:0060349	bone morphogenesis	17/1842	90/17913	0.00962378	0.0442067	0.0304223	ALPL/CHSY1/COL27A1/COMP/FGF18/GLG1/GLI3/LRP5/MEF2C/MSX1/RUNX2/SERPINH1/SFRP4/SKI/TGFB1/TGFB3/ZMPSTE24	17
GO:1904707	positive regulation of vascular smooth muscle cell proliferation	11/1842	49/17913	0.00970392	0.0443925	0.0305502	AGT/EDN1/IGF1/IGFBP5/JAK2/JUN/MFN2/MIR20A/MIR221/MMP2/NR4A3	11
GO:2001238	positive regulation of extrinsic apoptotic signaling pathway	11/1842	49/17913	0.00970392	0.0443925	0.0305502	AGT/AGTR2/ATF3/CYLD/DAPK3/G0S2/HYAL2/LTBR/SFRP1/SKIL/THBS1	11
GO:1902105	regulation of leukocyte differentiation	40/1842	267/17913	0.00971241	0.0443925	0.0305502	AXL/BCL6/C1QC/CEBPB/CTNNB1/CYLD/FBN1/FBXW7/FES/FOS/GATA2/GLI3/HCLS1/JUN/KLF10/LYN/MAFB/MITF/MYC/NFKBIZ/NME1/NOTCH2/NRARP/PIAS3/PIK3R6/RHOA/SFRP1/SH3RF1/SOCS1/SOS1/STAT5B/TESC/TGFB1/TMEM178A/TRIB1/TYROBP/XBP1/ZC3H12A/ZEB1/ZMIZ1	40
GO:0051492	regulation of stress fiber assembly	16/1842	83/17913	0.00972204	0.0443925	0.0305502	APOA1/ARAP1/INPP5K/MIR20A/NOX4/PHLDB2/PPM1F/PXN/RHOA/S100A10/SFRP1/SMAD3/SYNPO2L/TGFB3/TPM1/WAS	16
GO:0003281	ventricular septum development	15/1842	76/17913	0.00973044	0.0443925	0.0305502	FZD2/GATA4/HEG1/HEY2/HEYL/MIR1-1/NKX2-5/NOS3/PROX1/SLIT2/SOX4/TBX5/TGFB2/TGFBR3/XIRP2	15
GO:0071383	cellular response to steroid hormone stimulus	37/1842	243/17913	0.00975989	0.0443925	0.0305502	AGTR2/AIFM1/AR/ATP1A1/ATP1A2/ATP1A3/BUD31/CTNNB1/DDIT4/EDN1/EP300/ERRFI1/ESR1/FAM107A/FBXO32/FHL2/FKBP4/FOXO1/HEYL/JAK2/KANK2/LBH/NPC1/NR4A3/PIAS2/RHOA/RNF4/RWDD1/SERPINF1/SFRP1/SMARCA4/TADA3/TGFB1/UBR5/YAP1/YWHAH/ZFP36	37
GO:0006677	glycosylceramide metabolic process	6/1842	19/17913	0.00978418	0.0443925	0.0305502	ALDH5A1/B3GALT2/CLN3/GLA/PRKCD/ST6GALNAC6	6
GO:0010523	negative regulation of calcium ion transport into cytosol	6/1842	19/17913	0.00978418	0.0443925	0.0305502	BCL2/CALM2/MIR133A1/MIR133A2/PKD2/TGFB1	6
GO:0032026	response to magnesium ion	6/1842	19/17913	0.00978418	0.0443925	0.0305502	CCND1/CD14/ENTPD6/SNCA/THBS1/TNFRSF11B	6
GO:0032332	positive regulation of chondrocyte differentiation	6/1842	19/17913	0.00978418	0.0443925	0.0305502	FGF18/GLI3/LOXL2/RELA/RUNX2/SMAD3	6
GO:0045663	positive regulation of myoblast differentiation	6/1842	19/17913	0.00978418	0.0443925	0.0305502	BOC/IGFBP3/MEF2C/RANBP3L/RBM24/SMYD1	6
GO:0060149	negative regulation of posttranscriptional gene silencing	6/1842	19/17913	0.00978418	0.0443925	0.0305502	ESR1/POU5F1/TGFB1/TP53/ZC3H12A/ZMPSTE24	6
GO:0060967	negative regulation of gene silencing by RNA	6/1842	19/17913	0.00978418	0.0443925	0.0305502	ESR1/POU5F1/TGFB1/TP53/ZC3H12A/ZMPSTE24	6
GO:0090201	negative regulation of release of cytochrome c from mitochondria	6/1842	19/17913	0.00978418	0.0443925	0.0305502	AKT1/FXN/HIGD1A/IGF1/LMNA/OPA1	6
GO:0098915	membrane repolarization during ventricular cardiac muscle cell action potential	6/1842	19/17913	0.00978418	0.0443925	0.0305502	KCNE4/KCNJ8/MIR1-1/MIR133A1/MIR133A2/RNF207	6
GO:2000696	regulation of epithelial cell differentiation involved in kidney development	6/1842	19/17913	0.00978418	0.0443925	0.0305502	CTNNB1/FAT4/OSR1/PROM1/WWTR1/YAP1	6
GO:0008645	hexose transmembrane transport	20/1842	112/17913	0.00990222	0.0448936	0.0308951	AKT1/BRAF/CLIP3/EDN1/EDNRA/GRB10/IGF1/INPP5K/LEP/NR4A3/PID1/PRKAG2/PTPN11/RHOQ/SLC2A1/SLC2A12/SLC2A3/SLC5A1/SORBS1/SORT1	20
GO:0030595	leukocyte chemotaxis	30/1842	188/17913	0.00995577	0.0451018	0.0310384	AIF1/CCL11/CCL2/CMKLR1/CORO1A/CXADR/CXCR4/DUSP1/EDN1/EDN2/F2RL1/IL6/ITGA9/ITGB2/KARS/LGALS3/LYN/MMP28/PDE4D/PIK3CG/RAC2/S100A12/S100A8/S100A9/SERPINE1/SLIT2/SWAP70/TGFB2/THBS1/THBS4	30
GO:0045471	response to ethanol	22/1842	127/17913	0.0100761	0.045612	0.0313894	ACTC1/CA3/CBL/CCND1/CD14/CYBB/FYN/GSN/HAMP/LEP/MAOB/OXCT1/PENK/RGS2/RGS4/RHOA/S100A8/SETD7/SPARC/STAT3/TNC/USP46	22
GO:0033619	membrane protein proteolysis	12/1842	56/17913	0.0103354	0.0463632	0.0319064	ADAM19/APOE/BACE1/MYH9/PRKCQ/PTPN3/RELA/RHBDD1/SH3D19/SPPL2A/TGFB1/TIMP1	12
GO:0001921	positive regulation of receptor recycling	5/1842	14/17913	0.0103438	0.0463632	0.0319064	ANXA2/ARAP1/INPP5F/SNCA/VAMP3	5
GO:0006825	copper ion transport	5/1842	14/17913	0.0103438	0.0463632	0.0319064	ATP7A/FKBP4/HEPH/SCO1/SCO2	5
GO:0010248	establishment or maintenance of transmembrane electrochemical gradient	5/1842	14/17913	0.0103438	0.0463632	0.0319064	ATP1A1/ATP1A2/ATP1A3/ATP1B1/ATP1B3	5
GO:0014854	response to inactivity	5/1842	14/17913	0.0103438	0.0463632	0.0319064	CASQ1/FBXO32/HDAC4/SCN5A/SGCA	5
GO:0032780	negative regulation of ATPase activity	5/1842	14/17913	0.0103438	0.0463632	0.0319064	CNN3/PLN/RGN/TNNI3/TNNT2	5
GO:0035791	platelet-derived growth factor receptor-beta signaling pathway	5/1842	14/17913	0.0103438	0.0463632	0.0319064	HIP1/MYOCD/PDGFRB/PDGFRL/PTPN1	5
GO:0035810	positive regulation of urine volume	5/1842	14/17913	0.0103438	0.0463632	0.0319064	EDN1/HYAL2/INPP5K/NPPB/NPR3	5
GO:0038166	angiotensin-activated signaling pathway	5/1842	14/17913	0.0103438	0.0463632	0.0319064	ACTN2/AGTR1/AGTR2/AGTRAP/CAMK2A	5
GO:0051127	positive regulation of actin nucleation	5/1842	14/17913	0.0103438	0.0463632	0.0319064	CYFIP1/FCHSD2/GSN/TRIM27/WAS	5
GO:0072567	chemokine (C-X-C motif) ligand 2 production	5/1842	14/17913	0.0103438	0.0463632	0.0319064	F2RL1/KLF4/MAP2K5/MBP/POSTN	5
GO:0090399	replicative senescence	5/1842	14/17913	0.0103438	0.0463632	0.0319064	CDKN1A/MME/PLA2R1/SERPINE1/TP53	5
GO:2000846	regulation of corticosteroid hormone secretion	5/1842	14/17913	0.0103438	0.0463632	0.0319064	AGT/AGTR1/AGTR2/C1QTNF1/PTPN11	5
GO:0010470	regulation of gastrulation	10/1842	43/17913	0.0104055	0.0464988	0.0319997	APOA1/COL5A2/KLF4/MAP2K5/MBP/MIR1-1/MIR221/OSR1/PHLDB1/PHLDB2	10
GO:0021762	substantia nigra development	10/1842	43/17913	0.0104055	0.0464988	0.0319997	ACTB/CALM2/CKB/COX6B1/MAOB/MBP/RHOA/SEC16A/YWHAH/YWHAQ	10
GO:0045010	actin nucleation	10/1842	43/17913	0.0104055	0.0464988	0.0319997	ARPC1B/ARPC3/CORO1A/CYFIP1/FCHSD2/GSN/IQGAP2/LMOD2/TRIM27/WAS	10
GO:0060443	mammary gland morphogenesis	10/1842	43/17913	0.0104055	0.0464988	0.0319997	AR/CAPN1/CAV3/CCL11/DDR1/ESR1/GLI3/IGFBP5/KDM5B/TGFB1	10
GO:0042136	neurotransmitter biosynthetic process	18/1842	98/17913	0.0105016	0.0468574	0.0322465	AGT/AGTR2/AIF1/AKT1/ATP2B4/CYP1B1/EDN1/GLA/ITGB2/JAK2/KLF2/KLF4/NOS3/PKD2/RGN/SIRPA/SMAD3/ZC3H12A	18
GO:0043266	regulation of potassium ion transport	18/1842	98/17913	0.0105016	0.0468574	0.0322465	ACTN2/ATP1B1/ATP1B3/CAV3/FHL1/KCNA5/KCNAB1/KCNIP2/KCNJ2/KLHL24/MIR1-1/MIR133A1/MIR133A2/NOS3/NPPA/RGS4/RNF207/WWP2	18
GO:0006898	receptor-mediated endocytosis	44/1842	301/17913	0.0106286	0.0473883	0.0326119	ANKRD13A/ANXA2/APOA1/APOE/ATAD1/BICD1/CALCRL/CAP1/CAV3/CBL/CD14/CD163/CD9/CLN3/EGF/FCER1G/FCHSD2/FMR1/GPR107/HIP1/HPR/HSPG2/INPP5F/ITGB1/ITGB2/LDLR/LRP3/MARCO/MASP1/MICALL1/PICALM/PLA2R1/RAMP1/SERPINE1/SFRP4/SGIP1/SH3GL2/SNCA/SNX1/SPARC/SYT11/TFRC/UBQLN2/USP46	44
GO:0006026	aminoglycan catabolic process	13/1842	63/17913	0.0107249	0.0477429	0.0328559	AGRN/CD44/FMOD/GLB1/GPC6/HSPG2/HYAL2/IDUA/LUM/LYVE1/OMD/PRELP/TGFB1	13
GO:0140029	exocytic process	13/1842	63/17913	0.0107249	0.0477429	0.0328559	CAMK2A/EXOC6B/FCER1G/LYN/NPPA/PLEK/RAB3A/SNCA/UNC13B/VAMP3/VAMP8/VPS33A/YKT6	13
GO:0010717	regulation of epithelial to mesenchymal transition	17/1842	91/17913	0.0107323	0.0477429	0.0328559	CTNNB1/EPHA3/GCNT2/IL6/LOXL2/MIR221/MIR590/PHLDB1/PHLDB2/PPP2CA/SFRP1/SMAD3/TBX5/TGFB1/TGFB2/TGFB3/WWTR1	17
GO:1901379	regulation of potassium ion transmembrane transport	16/1842	84/17913	0.0108947	0.0482624	0.0332134	ACTN2/ATP1B1/ATP1B3/CAV3/FHL1/KCNAB1/KCNIP2/KCNJ2/KLHL24/MIR1-1/MIR133A1/MIR133A2/NPPA/RGS4/RNF207/WWP2	16
GO:0003279	cardiac septum development	20/1842	113/17913	0.0109018	0.0482624	0.0332134	FZD2/GATA4/GATA6/HEG1/HEY2/HEYL/MAML1/MIR1-1/NKX2-5/NOS3/NOTCH2/PARVA/PROX1/SLIT2/SOX4/TBX5/TGFB2/TGFBR3/TP53/XIRP2	20
GO:0010906	regulation of glucose metabolic process	20/1842	113/17913	0.0109018	0.0482624	0.0332134	ACACB/AKT1/C1QTNF1/EP300/FOXO1/GSK3B/IGF1/IGFBP3/IGFBP4/IGFBP5/INPP5K/LEP/LEPR/MIDN/MLYCD/PDK4/RGN/SORBS1/TP53/ZMPSTE24	20
GO:0000045	autophagosome assembly	14/1842	70/17913	0.0109217	0.0482624	0.0332134	ATG13/ATG3/BAG3/LRSAM1/MFN2/MTMR3/NUPR1/SMCR8/SMURF1/TMEM41B/UBQLN2/ULK1/WDR45B/WIPI1	14
GO:0002719	negative regulation of cytokine production involved in immune response	7/1842	25/17913	0.010933	0.0482624	0.0332134	APOA1/BCL6/BST2/IRAK3/TGFB1/TGFB2/TGFB3	7
GO:0051894	positive regulation of focal adhesion assembly	7/1842	25/17913	0.010933	0.0482624	0.0332134	COL16A1/MAP4K4/PPM1F/S100A10/SFRP1/SMAD3/THY1	7
GO:0007548	sex differentiation	40/1842	269/17913	0.0109502	0.0482624	0.0332134	AGO4/AR/ARID5B/ASB1/AXL/BCL2/CASP3/CBL/CCND1/CEBPB/CTNNB1/DNAJC19/ESR1/FKBP4/GATA4/GATA6/GJA1/HMGB2/HSD17B4/LEP/LHFPL2/MAMLD1/MGST1/NOS3/NUPR1/OSR1/PDGFRA/PDGFRB/PTPN11/RDH10/RETN/SFRP1/SGPL1/SLIT2/SOX15/STAT5B/TBC1D20/TESC/TGFB2/TIPARP	40
GO:0006778	porphyrin-containing compound metabolic process	9/1842	37/17913	0.0109528	0.0482624	0.0332134	ALAS1/BLVRA/BLVRB/COX10/COX15/FXN/HMOX2/RSAD1/SUCLA2	9
GO:0014912	negative regulation of smooth muscle cell migration	9/1842	37/17913	0.0109528	0.0482624	0.0332134	AIF1/IGFBP3/IGFBP5/MEF2C/MYOCD/SERPINE1/SLIT2/TPM1/TRIB1	9
GO:0030212	hyaluronan metabolic process	9/1842	37/17913	0.0109528	0.0482624	0.0332134	ABCC5/AKT1/CD44/EGF/HYAL2/ITIH5/LYVE1/PIM1/TGFB1	9
GO:0032365	intracellular lipid transport	9/1842	37/17913	0.0109528	0.0482624	0.0332134	ACACB/ANXA2/CPT1B/LDLR/NPC1/OSBPL2/PRKAG2/SCP2/SLC25A20	9
GO:1903427	negative regulation of reactive oxygen species biosynthetic process	9/1842	37/17913	0.0109528	0.0482624	0.0332134	ATP2B4/FYN/GLA/MIR590/RGN/RHOA/SIRPA/STAT3/ZC3H12A	9
GO:0016241	regulation of macroautophagy	27/1842	166/17913	0.010955	0.0482624	0.0332134	AKT1/ATG13/ATP13A2/ATP6V0E2/BAG3/BNIP3/CALCOCO2/CAPN1/CASP3/FYCO1/HTT/LRSAM1/MFN2/MTMR3/NPC1/NUPR1/PIK3CA/PRKAG2/SCOC/SMCR8/SMURF1/SPTLC2/SUPT5H/TP53/UBQLN2/UCHL1/ULK1	27
GO:0072088	nephron epithelium morphogenesis	15/1842	77/17913	0.010967	0.0482793	0.033225	AGT/AGTR2/BCL2/CTNNB1/DCHS1/FAT4/GLI3/GZF1/IRX2/IRX3/KLHL3/MYC/OSR1/PKD2/TGFB1	15
GO:0032355	response to estradiol	22/1842	128/17913	0.0110198	0.0484036	0.0333106	AGT/AIFM1/ARPC1B/CASP3/CCND1/CRYAB/CTNNB1/DUSP1/ENDOG/ESR1/GJA1/LEP/MAP1B/MMP15/PDGFRB/PENK/POSTN/SFRP1/SOCS2/STAT3/STAT5B/TGFB1	22
GO:0045667	regulation of osteoblast differentiation	22/1842	128/17913	0.0110198	0.0484036	0.0333106	CEBPB/CEBPD/CLIC1/CTHRC1/CTNNB1/GDF10/GJA1/GLI3/HDAC4/ID1/ID3/IFITM1/IGF1/IGFBP5/IL6/LRP5/MEF2C/RANBP3L/RUNX2/SFRP1/SKI/SMAD3	22
GO:0045995	regulation of embryonic development	22/1842	128/17913	0.0110198	0.0484036	0.0333106	APOA1/AR/COL5A2/CTNNB1/EHMT1/FZD2/GATA2/IGF1/KLF4/LAMA2/MAP2K5/MBP/MIR1-1/MIR221/NRARP/OSR1/PHLDB1/PHLDB2/RNF207/SFRP1/SULF1/TRAF3IP1	22
GO:0045742	positive regulation of epidermal growth factor receptor signaling pathway	8/1842	31/17913	0.0112042	0.0490681	0.0337679	AGT/AKT1/ARAP1/CBL/EGF/FBXW7/HIP1/SOS1	8
GO:0046471	phosphatidylglycerol metabolic process	8/1842	31/17913	0.0112042	0.0490681	0.0337679	HADHB/LCLAT1/LPCAT4/MECP2/PGS1/PLA2G2A/TAMM41/TAZ	8
GO:0051955	regulation of amino acid transport	8/1842	31/17913	0.0112042	0.0490681	0.0337679	ACE2/AGT/ATP1A2/LEP/OSR1/RGS2/RGS4/SNCA	8
GO:1903393	positive regulation of adherens junction organization	8/1842	31/17913	0.0112042	0.0490681	0.0337679	COL16A1/MAP4K4/MAPRE2/PPM1F/S100A10/SFRP1/SMAD3/THY1	8
GO:0030856	regulation of epithelial cell differentiation	25/1842	151/17913	0.0112781	0.0493552	0.0339654	CCND1/CDKN1C/CEBPB/CTNNB1/CTSK/ERRFI1/FAT4/FRZB/GSK3B/HEY2/ID1/MIR1-1/NUMA1/OSR1/PRKCH/PROM1/S1PR3/SERPINE1/SFRP4/STAT5B/TNFRSF1A/WWTR1/YAP1/ZEB1/ZFP36	25
GO:0045661	regulation of myoblast differentiation	11/1842	50/17913	0.0113142	0.04944	0.0340238	BOC/DDIT3/ID3/IGFBP3/MEF2C/MYOCD/PRICKLE1/RANBP3L/RBM24/SMYD1/TGFB1	11
GO:2000725	regulation of cardiac muscle cell differentiation	11/1842	50/17913	0.0113142	0.04944	0.0340238	CAV3/EDN1/HAMP/IGF1/MEF2C/MIR1-1/MIR590/MYOCD/RGS2/RGS4/TGFB1	11
GO:0043534	blood vessel endothelial cell migration	29/1842	182/17913	0.0113519	0.0495683	0.0341121	AGTR2/AKT1/AMOTL1/APOA1/APOE/FBXW7/FGF18/GATA2/ID1/ITGB1/KLF4/MAP2K5/MAP3K3/MECP2/MEF2C/MIR20A/MIR221/MMRN2/MYH9/NOS3/PLK2/RHOA/SLIT2/SOX18/SP1/STARD13/TGFB1/THBS1/VASH1	29

## Sheet: CandidateGene_KEGG
ID	Description	GeneRatio	BgRatio	pvalue	p.adjust	qvalue	geneID	Count
hsa05410	Hypertrophic cardiomyopathy (HCM)	41/989	90/7946	6.13591e-15	1.94508e-12	1.06571e-12	1636/60/70/183/488/775/781/55799/783/1674/1906/3479/3569/8515/3678/3680/3688/3691/3693/3908/4000/4607/4624/4625/4633/4634/51422/6262/6442/6444/6445/6546/7040/7042/7043/7134/7137/7139/7168/7170/7273	41
hsa05414	Dilated cardiomyopathy (DCM)	42/989	96/7946	1.6545e-14	2.62239e-12	1.43681e-12	60/70/109/196883/112/153/183/488/775/781/55799/783/1674/3479/8515/3678/3680/3688/3691/3693/3908/4000/4607/4624/4625/4633/4634/5350/6262/6442/6444/6445/6546/7040/7042/7043/7134/7137/7139/7168/7170/7273	42
hsa04510	Focal adhesion	61/989	199/7946	5.10659e-12	5.39596e-10	2.95644e-10	60/87/207/2909/596/330/673/859/595/894/1282/1284/1292/1293/1311/1499/1729/1793/1950/2002/2317/2318/2335/2534/2932/3265/3479/3480/8515/3678/3680/3688/3691/3693/3725/3908/3912/5604/4633/58498/85366/91807/55742/5156/5159/5290/5829/5880/5894/2889/387/6464/6654/6696/7057/7060/7094/3371/7414/7450/7791	61
hsa04261	Adrenergic signaling in cardiomyocytes	48/989	149/7946	1.48962e-10	1.01462e-08	5.5591e-09	70/109/196883/112/153/183/185/186/207/1388/476/477/478/481/483/488/493/596/775/781/55799/783/805/815/64764/2776/6300/4624/4625/4633/4634/5294/146850/5350/5502/5515/5520/28227/5525/5527/6262/6331/6546/7134/7137/7139/7168/7170	48
hsa05210	Colorectal cancer	34/989	86/7946	1.60035e-10	1.01462e-08	5.5591e-09	207/596/332/673/836/595/1026/1499/54205/1950/2353/1647/4616/10912/2932/3265/3725/3845/5604/5605/4292/4609/4893/5290/5880/5894/5898/387/4088/6654/7040/7042/7043/7157	34
hsa04933	AGE-RAGE signaling pathway in diabetic complications	37/989	100/7946	2.39137e-10	1.26344e-08	6.9224e-09	183/185/207/596/836/6347/595/1282/1284/1536/1729/1906/1958/2335/2308/3265/3569/3717/3725/3845/6300/4313/4846/50507/4893/5290/5292/51196/5580/5970/5054/4088/6774/6777/7040/7042/7043	37
hsa04210	Apoptosis	43/989	136/7946	2.6221e-09	1.18744e-07	6.50597e-08	60/9131/207/596/330/332/823/836/1508/1075/8722/1513/54205/1649/9451/2021/2353/1647/4616/10912/3265/3708/3710/3725/3845/4000/5604/5605/4792/4893/5290/5551/5894/5970/6709/7132/7157/7846/10376/84790/7278/113457/112714	43
hsa04714	Thermogenesis	61/989	231/7946	4.10888e-09	1.62814e-07	8.92059e-08	2181/60/109/196883/112/57492/353500/493753/388753/1352/84987/1355/51241/116228/9377/1340/1351/1375/64764/1537/8110/3265/51780/3845/6300/4705/126328/55967/4695/56901/4698/4706/51103/91942/29078/137682/4709/4711/4712/4715/4717/4718/4720/4726/4728/4723/4729/4731/4878/4879/4893/51422/6389/6392/788/6597/6601/6654/7381/7384/7386	61
hsa04260	Cardiac muscle contraction	31/989	86/7946	1.42792e-08	5.02946e-07	2.75564e-07	70/476/477/478/481/483/488/775/781/55799/783/9377/1340/1351/1537/3270/4624/4625/4633/4634/6262/6546/10479/7134/7137/7139/7168/7170/7381/7384/7386	31
hsa04932	Non-alcoholic fatty liver disease (NAFLD)	44/989	149/7946	1.782e-08	5.64895e-07	3.09506e-07	207/836/9377/1340/1351/1537/54205/1649/9451/2932/3569/3725/3952/3953/4705/126328/55967/4695/56901/4698/4706/4709/4711/4712/4715/4717/4718/4720/4726/4728/4723/4729/4731/5290/51422/5970/6389/6392/7040/7132/7381/7384/7386/7494	44
hsa05010	Alzheimer disease	48/989	171/7946	2.41962e-08	6.97291e-07	3.82046e-07	348/351/488/23621/775/805/823/836/9377/1340/1351/1537/54205/9451/2776/2932/3028/3708/3710/4311/4705/126328/55967/4695/56901/4698/4706/4709/4711/4712/4715/4717/4718/4720/4726/4728/4723/4729/4731/10313/57142/6389/6392/6622/7132/7381/7384/7386	48
hsa05220	Chronic myeloid leukemia	28/989	76/7946	4.14566e-08	1.09515e-06	6.0003e-07	207/673/867/595/1026/9846/1647/4616/10912/3265/3845/5604/5605/4609/4792/4893/5290/5781/5894/5970/6464/4088/6654/6777/7040/7042/7043/7157	28
hsa05205	Proteoglycans in cancer	53/989	204/7946	7.88018e-08	1.87981e-06	1.02995e-06	60/207/23365/673/815/836/859/867/595/960/1026/1499/2002/2099/2317/2318/2335/2535/1839/3059/3265/3339/3479/3480/3678/3688/3693/3708/3710/3845/4060/5604/5605/6300/4313/22808/4478/4609/4893/5290/5328/51196/5781/5829/5894/387/6237/6654/6774/7040/7042/7057/7157	53
hsa04022	cGMP-PKG signaling pathway	46/989	167/7946	8.87016e-08	1.87981e-06	1.02995e-06	109/196883/112/153/185/207/1388/476/477/478/481/483/488/493/775/805/64764/1909/2626/2776/3708/3710/3764/5604/5605/4208/4624/4625/85366/91807/4846/4878/4879/5139/8654/5294/146850/5350/5894/5997/387/291/6546/7416/7417/7419	46
hsa04068	FoxO signaling pathway	39/989	131/7946	9.09081e-08	1.87981e-06	1.02995e-06	207/604/664/673/595/894/901/1026/1387/1950/2033/114907/2308/4303/1647/4616/10912/2911/3265/3479/3480/3569/10365/3845/5604/5605/6300/4893/5290/10769/51422/5894/80854/4088/6654/6774/7040/7042/7043	39
hsa05215	Prostate cancer	32/989	97/7946	9.48798e-08	1.87981e-06	1.02995e-06	207/367/596/673/595/1026/64764/1387/1499/1950/2033/2078/2308/2932/3265/3479/3480/3845/5604/5605/4314/4792/4893/5156/5159/5290/5328/5894/5970/6654/7157/6935	32
hsa04540	Gap junction	30/989	88/7946	1.0439e-07	1.94656e-06	1.06652e-06	109/196883/112/153/1950/2697/2776/2911/3265/3708/3710/3845/5604/5605/5607/4893/5156/5159/5894/6654/7082/7846/10376/84790/7278/113457/112714/203068/10383/84617	30
hsa05213	Endometrial cancer	23/989	58/7946	1.40767e-07	2.47906e-06	1.35828e-06	207/673/595/1026/29119/1499/1950/2002/1647/4616/10912/2932/3265/3845/5604/5605/4292/4609/4893/5290/5894/6654/7157	23
hsa04066	HIF-1 signaling pathway	34/989	109/7946	1.76697e-07	2.94805e-06	1.61524e-06	207/226/230/596/815/1026/1387/1536/1906/1950/2023/2027/2033/3479/3480/3569/3939/3945/4055/5604/5605/4846/4878/5160/5162/5211/5213/5290/5970/5054/6513/6774/7037/7076	34
hsa04218	Cellular senescence	43/989	160/7946	4.93095e-07	7.81556e-06	4.28214e-06	207/805/823/595/894/1026/23291/2308/1647/4616/10912/2626/204851/28996/3265/3486/3569/3708/3710/3845/286826/5604/5605/6300/22808/4609/4893/5290/5481/5894/5970/6237/5054/291/4088/7040/7042/7043/7157/54822/7416/7417/7419	43
hsa04919	Thyroid hormone signaling pathway	35/989	119/7946	5.73206e-07	8.65268e-06	4.7408e-06	60/207/476/477/478/481/483/488/595/1387/1499/1734/2033/2099/2308/2626/2932/8841/3265/3845/5604/5605/23389/4609/4624/4625/4853/4893/5290/51196/5350/5894/25942/6513/7157	35
hsa01200	Carbon metabolism	34/989	117/7946	1.12905e-06	1.62686e-05	8.91357e-06	38/8310/55902/226/230/1738/1962/2023/2027/2271/2805/2821/2875/3418/4190/4191/10873/4524/5095/5160/5162/5211/5213/5224/26227/9104/6389/6392/113675/6472/8803/8802/7086/8277	34
hsa04810	Regulation of actin cytoskeleton	51/989	213/7946	2.05185e-06	2.82798e-05	1.54945e-05	60/87/2909/23365/10095/10094/81873/673/7852/23191/1729/1793/1950/55740/2149/8817/2252/2335/2934/3265/10788/8515/3678/3680/3688/3689/3691/3693/3845/3985/5604/5605/22808/4478/79784/4627/4633/58498/85366/91807/4893/5156/5159/5290/5829/5880/5894/387/6237/6654/7414	51
hsa04921	Oxytocin signaling pathway	40/989	153/7946	2.63219e-06	3.47669e-05	1.90488e-05	60/109/196883/112/775/781/55799/783/805/815/10645/595/1026/2002/2353/2776/3265/3708/3710/3725/3759/3761/3845/5604/5605/5607/4208/85366/91807/4846/4878/4893/5294/146850/8605/51422/5894/5997/387/6262	40
hsa05216	Thyroid cancer	16/989	37/7946	2.94757e-06	3.73752e-05	2.04779e-05	673/8030/595/1026/1499/1647/4616/10912/3265/3845/5604/5605/4609/4893/7157/7170	16
hsa05412	Arrhythmogenic right ventricular cardiomyopathy (ARVC)	25/989	77/7946	3.32985e-06	4.05985e-05	2.22439e-05	60/88/488/775/781/55799/783/29119/1499/1674/1832/2697/8515/3678/3680/3688/3691/3693/3908/4000/6262/6442/6444/6445/6546	25
hsa05230	Central carbon metabolism in cancer	23/989	69/7946	4.95341e-06	5.68709e-05	3.11595e-05	207/3265/3845/3939/3945/5604/5605/4609/4893/5156/5159/5160/5162/5211/5213/5224/5290/5894/9997/9123/6513/8140/7157	23
hsa04071	Sphingolipid signaling pathway	33/989	119/7946	5.02329e-06	5.68709e-05	3.11595e-05	4363/207/427/596/2205/2207/2534/9846/2776/3265/3845/5604/5605/6300/4846/4893/5290/5515/5520/28227/5525/5527/5880/5894/5970/387/1903/8879/130367/6609/9517/7132/7157	33
hsa05012	Parkinson disease	37/989	142/7946	6.7596e-06	7.31963e-05	4.01043e-05	836/9377/1340/1351/1537/54205/4705/126328/55967/4695/56901/4698/4706/4709/4711/4712/4715/4717/4718/4720/4726/4728/4723/4729/4731/6389/6392/291/6622/9627/7345/7381/7384/7386/7416/7417/7419	37
hsa05214	Glioma	24/989	75/7946	6.9271e-06	7.31963e-05	4.01043e-05	207/673/805/815/595/1026/1950/1647/4616/10912/3265/3479/3480/3845/5604/5605/4893/5156/5159/5290/5894/6464/6654/7157	24
hsa05016	Huntington disease	46/989	193/7946	7.3927e-06	7.55963e-05	4.14192e-05	836/9377/1340/1351/64764/1387/1537/54205/1639/2033/2776/3092/3064/3708/4705/126328/55967/4695/56901/4698/4706/4709/4711/4712/4715/4717/4718/4720/4726/4728/4723/4729/4731/5430/6389/6392/25942/291/6667/7157/7381/7384/7386/7416/7417/7419	46
hsa05218	Melanoma	23/989	72/7946	1.10818e-05	0.00010917	5.98143e-05	207/673/595/1026/1950/8817/2252/1647/4616/10912/3265/3479/3480/3845/5604/5605/4286/4893/5156/5159/5290/5894/7157	23
hsa04978	Mineral absorption	20/989	58/7946	1.14842e-05	0.00010917	5.98143e-05	476/477/478/481/483/493/538/9843/3163/4489/4493/4495/4499/4501/4502/7779/6523/6546/261729/54822	20
hsa05130	Pathogenic Escherichia coli infection	47/989	202/7946	1.17091e-05	0.00010917	5.98143e-05	10006/60/23365/9181/10095/10094/81873/836/54205/23191/9266/9265/2149/2212/2353/2534/3055/3059/3569/3688/3725/4067/6300/79784/57644/4627/4642/4643/4646/8440/4792/5781/5970/387/7082/7132/7846/10376/84790/7278/113457/112714/203068/10383/84617/7456/644150	47
hsa04935	Growth hormone synthesis, secretion and action	32/989	119/7946	1.39879e-05	0.000121073	6.63357e-05	109/196883/112/207/1388/775/64764/1387/2033/2353/2776/2932/3265/3479/3486/3708/3710/3717/3726/3845/5604/5605/6300/4893/5290/5894/6464/8651/8835/6654/6774/6777	32
hsa01522	Endocrine resistance	28/989	98/7946	1.40531e-05	0.000121073	6.63357e-05	109/196883/112/207/596/673/595/1026/2099/2353/1839/3265/3479/3480/3725/3845/5604/5605/6300/4313/4853/4893/5290/5894/6464/6654/6667/7157	28
hsa04145	Phagosome	38/989	152/7946	1.44217e-05	0.000121073	6.63357e-05	60/155066/715/929/30835/1311/11151/1535/1536/1783/2212/9146/3115/3126/3678/3688/3689/3693/3920/8685/22925/5878/83547/29927/6890/7037/7057/7060/7846/10376/84790/7278/113457/112714/203068/10383/84617/9341	38
hsa05219	Bladder cancer	16/989	41/7946	1.45135e-05	0.000121073	6.63357e-05	673/595/1026/1613/1950/1839/3265/3845/5604/5605/4313/4609/4893/5894/7057/7157	16
hsa04371	Apelin signaling pathway	35/989	137/7946	1.89486e-05	0.000154018	8.43867e-05	109/196883/112/185/207/805/595/1958/2776/9759/3265/3708/3710/10365/3845/5604/5605/4208/22808/4633/4634/85366/91807/4846/4893/5294/146850/51422/5894/6237/6262/5054/6546/4088/6696	35
hsa04917	Prolactin signaling pathway	22/989	70/7946	2.28728e-05	0.000181267	9.93159e-05	207/595/894/2099/2353/2932/3265/3717/3845/5604/5605/6300/4893/5290/5894/5970/6464/8651/8835/6654/6774/6777	22
hsa00640	Propanoate metabolism	14/989	34/7946	2.43342e-05	0.000188145	0.000103085	32/38/8310/55902/79611/594/1738/1962/3939/3945/23417/5095/8803/8802	14
hsa04722	Neurotrophin signaling pathway	31/989	119/7946	3.73651e-05	0.000282018	0.000154517	207/396/397/596/673/805/815/2932/3265/11213/3725/57498/3845/5604/5605/5607/4215/6300/4792/4893/5290/5580/5781/5894/2889/5970/387/6464/6272/6654/7157	31
hsa04072	Phospholipase D signaling pathway	36/989	148/7946	4.53191e-05	0.000334096	0.000183051	109/196883/112/10555/183/185/207/9266/9265/160851/1950/2149/2205/2207/2534/9846/2911/3265/3845/5604/5605/22808/4893/5156/5159/5290/5294/146850/8605/5781/5894/5898/387/6237/6464/6654	36
hsa04915	Estrogen signaling pathway	34/989	138/7946	5.54996e-05	0.000399849	0.000219077	109/196883/112/207/1388/596/805/64764/2099/2288/2289/2353/2776/2911/1839/3265/3306/3310/3312/3708/3710/3725/3845/5604/5605/4313/4846/4893/5290/5580/5894/6464/6654/6667	34
hsa05211	Renal cell carcinoma	21/989	69/7946	5.95496e-05	0.000419494	0.000229841	207/673/1026/1387/2033/2271/3265/3725/3845/5604/5605/4893/5290/5781/5894/2889/6513/6654/7040/7042/7043	21
hsa05161	Hepatitis B	38/989	162/7946	6.58705e-05	0.000453934	0.00024871	207/1388/596/332/673/836/1026/64764/1387/54205/2002/2033/2353/3265/3339/3569/3717/3725/3845/5604/5605/6300/4609/4792/4893/5290/5894/5970/4088/6654/6774/6777/7040/7042/7043/7157/7419/10971	38
hsa05224	Breast cancer	35/989	147/7946	9.18717e-05	0.000619645	0.000339503	207/673/595/1026/1499/1857/1950/2099/8817/2252/2353/2535/1647/4616/10912/2932/23493/26508/3265/3479/3480/3725/3845/4041/5604/5605/4609/4853/4893/5290/5894/6464/6654/6667/7157	35
hsa05223	Non-small cell lung cancer	20/989	66/7946	9.49995e-05	0.000627393	0.000343748	207/673/595/1026/1950/2272/1647/4616/10912/3265/3845/5604/5605/4893/5290/5894/6654/6774/6777/7157	20
hsa04140	Autophagy - animal	33/989	137/7946	0.000113919	0.000736986	0.000403794	207/9776/55102/64422/596/664/10645/1508/1613/54541/9451/3265/3480/3708/3845/3920/5604/5605/22808/8897/4893/29982/5290/5515/5580/5588/5894/6237/140775/8408/9706/8673/55062	33
hsa04912	GnRH signaling pathway	25/989	93/7946	0.000120039	0.000761047	0.000416978	109/196883/112/775/805/815/1958/2002/2776/1839/3265/3708/3710/3725/3845/5604/5605/4215/6300/4313/4893/8605/5580/5894/6654	25
hsa00620	Pyruvate metabolism	14/989	39/7946	0.000144541	0.000892819	0.000489175	32/38/55902/217/1738/2271/3939/3945/197257/4190/4191/10873/5160/5162	14
hsa04024	cAMP signaling pathway	46/989	216/7946	0.000146456	0.000892819	0.000489175	8310/109/196883/112/153/207/476/477/478/481/483/488/493/673/775/805/815/64764/1387/1906/1907/1909/2033/2149/2353/2737/2892/10021/3725/5604/5605/4792/4878/5139/5144/5290/51196/5350/5880/5894/5970/387/6237/6262/56670/7137	46
hsa05225	Hepatocellular carcinoma	38/989	168/7946	0.000149564	0.000894563	0.000490131	60/207/57492/196528/673/595/1026/1499/8110/1857/2002/2535/1647/4616/10912/2932/2948/3265/3480/3845/4041/5604/5605/4257/4609/4893/5290/5894/6464/4088/6597/6601/6654/7040/7042/7043/7157/7296	38
hsa01521	EGFR tyrosine kinase inhibitor resistance	22/989	79/7946	0.000173552	0.00101882	0.000558209	207/558/596/673/1950/2932/3265/3479/3480/3569/3717/3845/5604/5605/4893/5156/5159/5290/5894/6464/6654/6774	22
hsa05145	Toxoplasmosis	28/989	112/7946	0.000188752	0.0010879	0.000596059	207/240/596/330/836/54205/3115/3126/3306/3310/3312/3688/3717/3908/3912/3949/23643/6300/4792/5294/146850/5970/8651/6774/7040/7042/7043/7132	28
hsa05166	Human T-cell leukemia virus 1 infection	46/989	219/7946	0.00020525	0.00116186	0.000636583	109/196883/112/207/1388/595/894/1026/64764/1387/64784/1958/2002/2033/2353/3115/3126/3265/3569/3689/3725/3845/4055/5604/5605/4215/4487/4609/4792/4893/5290/5970/291/6513/4088/6777/7040/7042/7043/7094/7132/7157/7416/7417/7419/7538	46
hsa04010	MAPK signaling pathway	58/989	295/7946	0.000216156	0.00120213	0.000658646	207/673/775/781/55799/783/836/929/1649/1843/80824/1847/1950/2002/8817/2252/2317/2318/2353/1647/4616/10912/3265/3306/3310/3312/3479/3480/3725/3845/5604/5605/5607/4215/9064/1326/9448/6300/23162/7867/4208/22808/4609/4893/5156/5159/8605/5801/5880/5894/5970/6237/6654/7040/7042/7043/7132/7157	58
hsa04137	Mitophagy - animal	19/989	65/7946	0.000238809	0.00130522	0.000715128	664/10241/9451/3265/3725/3845/55669/9927/4286/22808/4893/5970/55288/6237/6667/8887/79735/7157/8408	19
hsa05212	Pancreatic cancer	21/989	76/7946	0.000272579	0.00146453	0.000802418	207/673/595/1026/1950/1647/4616/10912/3845/5604/5290/5880/5894/5898/5970/4088/6774/7040/7042/7043/7157	21
hsa04015	Rap1 signaling pathway	44/989	210/7946	0.000296818	0.00156819	0.00085921	60/109/196883/112/207/673/805/1499/9732/1950/55740/2149/8817/2252/2357/2776/3265/3397/3479/3480/3688/3689/3845/9223/5604/5605/6300/22808/4893/5156/5159/5290/51196/5880/5894/5898/5909/2889/9771/387/6237/26037/7057/7094	44
hsa05131	Shigellosis	48/989	236/7946	0.000333224	0.00173167	0.000948783	60/87/207/9181/10095/10094/81873/596/664/10241/823/929/960/54205/1729/1793/9844/23291/2308/4303/2697/2932/3059/3678/3688/3708/3710/3725/6300/4633/58498/4792/5290/51196/5481/5580/5588/5829/5970/387/92610/7094/7132/10318/7157/7414/7416/55062	48
hsa00190	Oxidative phosphorylation	31/989	133/7946	0.000340357	0.00174021	0.000953463	155066/1352/1355/9377/1340/1351/1537/4705/126328/55967/4695/56901/4698/4706/4709/4711/4712/4715/4717/4718/4720/4726/4728/4723/4729/4731/6389/6392/7381/7384/7386	31
hsa04664	Fc epsilon RI signaling pathway	19/989	68/7946	0.000451089	0.00226977	0.0012436	207/240/241/2205/2207/2534/9846/3265/3845/4067/5604/5605/6300/4893/5290/8605/5880/5894/6654	19
hsa00280	Valine, leucine and isoleucine degradation	15/989	48/7946	0.000484228	0.00239844	0.00131411	30/10449/38/217/587/594/1738/1962/3032/11112/3028/64087/5019/64064/5095	15
hsa04611	Platelet activation	29/989	124/7946	0.000492484	0.00240181	0.00131595	60/109/196883/112/207/2909/23365/2149/2207/2212/2534/2776/3688/3708/3710/4067/6300/85366/91807/4846/5290/5294/146850/8605/387/6916/7094/8673/7450	29
hsa04012	ErbB signaling pathway	22/989	85/7946	0.000536405	0.00257637	0.00141159	207/673/815/867/1026/1950/2002/2932/1839/3265/3725/3845/5604/5605/4609/8440/4893/5290/5894/6464/6654/6777	22
hsa05226	Gastric cancer	33/989	149/7946	0.000595207	0.00281318	0.00154134	207/596/673/595/1026/29119/1499/1857/1950/8817/2252/2535/1647/4616/10912/2932/3265/3845/4041/5604/5605/4292/4609/4893/5290/5894/6464/4088/6654/7040/7042/7043/7157	33
hsa00020	Citrate cycle (TCA cycle)	11/989	30/7946	0.000603457	0.00281318	0.00154134	1738/2271/3418/4190/4191/5160/5162/6389/6392/8803/8802	11
hsa05202	Transcriptional misregulation in cancer	39/989	186/7946	0.000632746	0.00290696	0.00159272	604/330/55589/894/929/1026/1051/1649/2078/2308/1647/4616/10912/2892/3479/3480/3486/3569/4297/8861/4208/4211/4286/4291/4314/4609/64332/8013/26471/5328/8842/5970/860/25942/6667/8148/7157/7102/6935	39
hsa04270	Vascular smooth muscle contraction	30/989	132/7946	0.000662105	0.00299839	0.00164282	109/196883/112/183/185/23365/673/775/10203/805/1906/1907/1909/2776/3708/3710/5604/5605/85366/91807/4878/4879/5320/8605/5580/5583/5588/5894/10267/387	30
hsa04730	Long-term depression	17/989	60/7946	0.000745394	0.0032818	0.0017981	673/2776/2892/2911/3265/3479/3480/3708/3710/3845/4067/5604/5605/4893/8605/5515/5894	17
hsa05416	Viral myocarditis	17/989	60/7946	0.000745394	0.0032818	0.0017981	60/836/595/1525/54205/2534/3115/3126/3689/3908/4624/4625/5551/5880/6442/6444/6445	17
hsa04625	C-type lectin receptor signaling pathway	25/989	104/7946	0.000767552	0.00333307	0.00182619	207/23365/602/805/30835/1540/2207/3265/53342/3569/3708/3710/3725/3845/6300/22808/4792/4893/5290/5580/5781/5894/5970/387/6237	25
hsa05165	Human papillomavirus infection	61/989	330/7946	0.000820565	0.00351512	0.00192594	207/155066/836/595/894/1026/1282/1284/1292/1293/1311/64764/1387/1499/1857/1950/2033/2335/2308/2535/2932/55502/23493/26508/3265/8515/3678/3680/3688/3691/3693/3845/3908/3912/9223/9794/84441/55534/5604/5605/4853/4893/5159/5290/5515/5520/28227/5525/5527/5829/5894/5970/6654/6696/10474/7057/7060/3371/7132/7157/7450	61
hsa04512	ECM-receptor interaction	22/989	88/7946	0.000891979	0.0037701	0.00206564	375790/960/1282/1284/1292/1293/1311/2335/3339/8515/3678/3680/3688/3691/3693/3908/3912/6696/7057/7060/3371/7450	22
hsa05100	Bacterial invasion of epithelial cells	19/989	73/7946	0.00116817	0.00487251	0.00266965	60/10095/10094/81873/859/867/29119/1499/1793/9844/2335/3059/3678/3688/5290/5829/387/6464/7414	19
hsa00010	Glycolysis / Gluconeogenesis	18/989	68/7946	0.00126428	0.0052049	0.00285177	55902/124/220/217/226/230/669/1738/2023/2027/2821/3939/3945/5160/5162/5211/5213/5224	18
hsa05222	Small cell lung cancer	22/989	92/7946	0.00166964	0.00678558	0.00371782	207/596/330/836/595/1026/1282/1284/54205/2272/2335/1647/4616/10912/3688/3908/3912/4609/4792/5290/5970/7157	22
hsa05231	Choline metabolism in cancer	23/989	98/7946	0.00172854	0.00693603	0.00380025	207/56994/160851/1950/2353/3265/3725/3845/5604/5605/4893/5156/5159/5290/8605/5880/5894/6584/23446/57153/6654/6667/7454	23
hsa04151	PI3K-Akt signaling pathway	63/989	354/7946	0.00182159	0.00721804	0.00395476	207/1388/596/595/894/1026/1282/1284/1292/1293/1311/64764/54541/1950/2149/8817/2252/2335/2932/3265/3479/3480/3569/8515/3678/3680/3688/3691/3693/3717/3845/3908/3912/9223/5604/5605/4609/4846/4893/9180/5156/5159/5290/5294/146850/5515/5520/28227/5525/5527/5894/5970/6654/6696/7057/7060/117145/3371/7157/7450/7532/7533/10971	63
hsa00071	Fatty acid degradation	13/989	44/7946	0.00201681	0.00789293	0.00432454	30/10449/37/38/8310/2181/124/217/1375/10455/1962/2639/3032	13
hsa05167	Kaposi sarcoma-associated herpesvirus infection	37/989	186/7946	0.00232653	0.00888771	0.00486957	207/64422/805/836/595/1026/1387/1499/2920/54205/2033/2353/2932/3055/3265/3569/3708/3710/3717/3725/3845/4067/5604/5605/6300/4609/4792/4893/5290/5294/146850/5894/5970/6774/7132/7157/7538	37
hsa04928	Parathyroid hormone synthesis, secretion and action	24/989	106/7946	0.00232707	0.00888771	0.00486957	109/196883/112/1388/596/673/1026/64764/1958/2353/2776/1839/3708/3710/4041/9935/5604/4208/4324/5144/5894/387/860/6667	24
hsa04910	Insulin signaling pathway	29/989	137/7946	0.00258383	0.00975087	0.0053425	32/207/673/805/867/2002/2194/2308/2932/3265/51763/3845/5604/5605/4893/5256/5290/5507/51422/5770/5834/5894/2889/23433/6464/8651/8835/10580/6654	29
hsa04630	JAK-STAT signaling pathway	33/989	162/7946	0.00263558	0.00982916	0.00538539	207/596/595/894/1026/1387/1950/2033/2273/3265/3597/53342/3569/3717/3952/3953/4609/9180/5156/5159/9063/10401/5290/5292/5781/5894/8651/8835/6654/8027/6774/6777/85480	33
hsa04720	Long-term potentiation	17/989	67/7946	0.00279389	0.01018	0.00557764	673/775/805/815/1387/2033/2776/2911/3265/3708/3710/3845/5604/5605/4893/5502/5894	17
hsa05221	Acute myeloid leukemia	17/989	67/7946	0.00279389	0.01018	0.00557764	207/673/595/929/3265/3845/5604/5605/4609/4893/5290/5292/5894/5970/6654/6774/6777	17
hsa04213	Longevity regulating pathway - multiple species	16/989	62/7946	0.00305927	0.0110203	0.00603804	109/196883/112/207/1410/2308/3265/3306/3310/3312/3479/3480/3845/4893/5290/51422	16
hsa04925	Aldosterone synthesis and secretion	22/989	98/7946	0.00387694	0.0136953	0.00750364	109/196883/112/183/185/1388/476/477/478/481/483/493/775/805/815/64764/1585/2776/3708/3710/3949/4878	22
hsa04924	Renin secretion	17/989	69/7946	0.00388825	0.0136953	0.00750364	1636/112/153/183/185/775/805/1508/1906/1907/1909/2776/3708/3710/3759/4878/5139	17
hsa04926	Relaxin signaling pathway	27/989	129/7946	0.00420391	0.0144144	0.00789767	109/196883/112/207/1388/1282/1284/64764/1906/2353/2769/3265/3725/3845/5604/5605/6300/4313/4792/4846/4893/5290/5894/5970/6464/6654/7040	27
hsa04390	Hippo signaling pathway	31/989	154/7946	0.00421286	0.0144144	0.00789767	60/84962/332/353500/595/894/29119/1499/1857/23291/2535/2932/3397/3689/4609/5515/5520/5054/4088/7004/7040/7042/7043/7159/126374/23286/25937/10413/7532/7533/10971	31
hsa05163	Human cytomegalovirus infection	42/989	225/7946	0.00422884	0.0144144	0.00789767	109/196883/112/207/23365/1388/805/836/6347/595/1026/64764/1499/7852/54205/2002/2776/2932/3265/3569/3708/3710/3845/5604/5605/6300/4609/4792/4893/5156/5290/5829/5880/5894/5970/387/6654/6667/6774/6890/7132/7157	42
hsa04142	Lysosome	26/989	123/7946	0.00428058	0.0144356	0.00790925	10947/427/968/1201/1508/1075/8722/1511/1513/2548/2717/2720/84572/3425/3920/9741/55353/7805/9516/51172/4864/23659/26503/6609/6272/285362	26
hsa04723	Retrograde endocannabinoid signaling	30/989	148/7946	0.00434266	0.0144908	0.00793949	109/196883/112/775/2560/2776/2892/2911/3708/3710/6300/4705/126328/55967/4695/56901/4698/4706/4709/4711/4712/4715/4717/4718/4720/4726/4728/4723/4729/4731	30
hsa05160	Hepatitis C	31/989	155/7946	0.00465764	0.0153799	0.00842666	207/673/836/595/1026/1499/54205/1950/9451/2932/3265/3434/3845/3949/5604/5605/4609/4792/4893/5290/5515/5520/5894/5970/6654/6774/7132/7157/7532/7533/10971	31
hsa04668	TNF signaling pathway	24/989	112/7946	0.0049459	0.015868	0.00869407	207/1388/602/330/836/6347/1051/64764/2920/10059/1906/2353/8809/3569/3725/3726/5604/1326/6300/4314/4792/5290/5970/7132	24
hsa04670	Leukocyte transendothelial migration	24/989	112/7946	0.0049459	0.015868	0.00869407	60/87/2909/29119/1499/7852/1535/1536/3688/3689/58494/6300/4313/4478/4633/58498/5175/5290/5781/5829/5880/387/7070/7414	24
hsa04922	Glucagon signaling pathway	23/989	106/7946	0.00499251	0.015868	0.00869407	32/207/805/815/1375/64764/1387/2033/2308/2776/3708/3710/3939/3945/5160/5162/5211/5213/5224/5256/51422/5834/6513	23
hsa04350	TGF-beta signaling pathway	21/989	94/7946	0.00500568	0.015868	0.00869407	353500/1387/2033/2200/2331/57817/3397/3399/7044/4609/5515/56963/387/4088/57154/64750/6667/7040/7042/7043/7057	21
hsa04211	Longevity regulating pathway	20/989	89/7946	0.00567257	0.0173562	0.00950944	109/196883/112/207/1388/9776/10645/64764/79813/2308/3265/3479/3480/3845/4893/5290/51422/5970/7157/8408	20
hsa05235	PD-L1 expression and PD-1 checkpoint pathway in cancer	20/989	89/7946	0.00567257	0.0173562	0.00950944	207/1950/2353/3265/3717/3725/3845/5604/5605/4215/6300/4792/4893/5133/5290/5588/5781/5894/5970/6774	20
hsa04916	Melanogenesis	22/989	101/7946	0.00567873	0.0173562	0.00950944	109/196883/112/805/815/64764/1387/1499/1857/1906/2033/2535/2776/2932/3265/3845/5604/5605/4286/4893/5894/7306	22
hsa04974	Protein digestion and absorption	21/989	95/7946	0.00569414	0.0173562	0.00950944	59272/476/477/478/481/483/1303/7373/80781/81578/85301/1282/1284/1290/1292/1293/1294/4311/54407/9056/6546	21
hsa04152	AMPK signaling pathway	25/989	120/7946	0.00611466	0.0182863	0.0100191	32/207/10645/595/1375/64764/2194/2308/3479/3480/3952/3953/23417/5211/5213/5290/5515/5520/28227/5525/5527/51422/6319/55437/8408	25
hsa05135	Yersinia infection	25/989	120/7946	0.00611466	0.0182863	0.0100191	60/207/23365/64283/6347/1793/2335/2353/2932/3569/3678/3688/3725/5604/5605/6300/4792/5290/5829/5880/5970/387/7454/7456/644150	25
hsa05418	Fluid shear stress and atherosclerosis	28/989	139/7946	0.00627422	0.0185881	0.0101844	60/207/9181/596/805/859/6347/1499/1535/1843/1906/2353/2948/3725/10365/5607/6300/4208/4257/4313/4846/5175/5290/5880/5970/387/7132/7157	28
hsa04931	Insulin resistance	23/989	108/7946	0.00633867	0.0186052	0.0101938	32/183/207/1375/64764/2308/9945/2932/3569/4792/4846/5290/5507/51422/5580/5588/5770/5781/5834/5970/6513/6774/7132	23
hsa04380	Osteoclast differentiation	26/989	128/7946	0.00738964	0.021491	0.0117749	207/1513/1535/1540/2212/2274/2353/2354/2534/9846/3725/3726/353514/5604/6300/4286/4792/5290/5970/140885/8651/7040/7042/4982/7132/7305	26
hsa04920	Adipocytokine signaling pathway	16/989	69/7946	0.00928832	0.0267673	0.0146658	32/2181/207/10645/1375/3717/3952/3953/4792/51422/5588/5781/5970/6513/6774/7132	16
hsa04971	Gastric acid secretion	17/989	75/7946	0.00943622	0.0269485	0.0147651	60/109/196883/112/476/477/478/481/483/805/815/2776/3708/3710/3759/85366/91807	17
hsa04062	Chemokine signaling pathway	35/989	189/7946	0.00966605	0.0273584	0.0149896	109/196883/112/207/673/6356/6347/2920/7852/1794/9844/2268/2932/3055/3265/3717/3845/4067/5604/4792/4893/5290/5294/146850/5580/5829/5880/5894/5970/387/6464/6654/6774/6777/7454	35
hsa04725	Cholinergic synapse	23/989	112/7946	0.00993007	0.0278569	0.0152628	109/196883/112/207/596/775/815/64764/2353/2534/2776/3265/3708/3710/3717/3759/3761/3845/5604/4893/5290/5294/146850	23
hsa04662	B cell receptor signaling pathway	18/989	82/7946	0.0107917	0.0300084	0.0164416	207/2353/2932/3265/8519/3725/3845/353514/4067/5604/5605/4792/4893/5290/5880/5894/5970/6654	18
hsa04370	VEGF signaling pathway	14/989	59/7946	0.0117979	0.0325213	0.0178184	207/3265/3845/5604/5605/6300/7867/4846/4893/5290/8605/5829/5880/5894	14
hsa04927	Cortisol synthesis and secretion	15/989	65/7946	0.0121006	0.0330149	0.0180889	109/196883/112/183/185/1388/775/64764/1584/2776/3708/3710/3949/57552/6667	15
hsa04520	Adherens junction	16/989	71/7946	0.0122551	0.0330149	0.0180889	60/87/1387/29119/1499/2033/2534/3480/5770/5880/387/4088/10580/7082/7414/7454	16
hsa05140	Leishmaniasis	17/989	77/7946	0.0122895	0.0330149	0.0180889	1535/1536/2002/2212/2353/3115/3126/3688/3689/3717/3725/6300/4792/5970/7040/7042/7043	17
hsa04550	Signaling pathways regulating pluripotency of stem cells	27/989	140/7946	0.0128157	0.0340484	0.0186551	207/1499/1857/2535/2932/3265/3397/3399/3479/3480/3717/9314/3845/7044/5604/5605/6300/4211/4609/4893/5290/5460/5894/6498/4088/6774/463	27
hsa05142	Chagas disease (American trypanosomiasis)	21/989	102/7946	0.0129964	0.0340484	0.0186551	1636/207/713/714/6347/2353/2769/2776/3569/3725/6300/4792/5290/5515/5520/5970/5054/7040/7042/7043/7132	21
hsa05146	Amoebiasis	21/989	102/7946	0.0129964	0.0340484	0.0186551	87/836/929/1282/1284/1511/2920/2335/2769/2776/3569/3689/3908/3912/5290/5878/5970/7040/7042/7043/7414	21
hsa04020	Calcium signaling pathway	35/989	193/7946	0.0132606	0.0344559	0.0188784	109/196883/153/185/488/493/775/805/815/844/7852/1909/2149/2769/2776/2911/3270/3708/3710/85366/91807/4846/93129/5156/5159/5256/51196/5350/6262/291/6546/7134/7416/7417/7419	35
hsa04115	p53 signaling pathway	16/989	72/7946	0.0139934	0.0360642	0.0197596	596/836/595/894/901/1026/54205/1647/4616/10912/3479/3486/8493/5054/7057/7157	16
hsa04610	Complement and coagulation cascades	18/989	85/7946	0.015549	0.0397502	0.0217791	713/714/715/729/966/1675/2162/2149/2151/2157/3689/5648/5328/5627/5104/5054/11326/7450	18
hsa00310	Lysine degradation	14/989	61/7946	0.0157844	0.0400293	0.021932	38/217/1738/1962/79813/2145/2639/4297/58508/64324/23067/80854/150572/56950	14
hsa04660	T cell receptor signaling pathway	21/989	104/7946	0.0160813	0.0404586	0.0221673	207/2353/2534/2932/3265/3725/3845/5604/5605/1326/6300/8440/4792/4893/5133/5290/5588/5894/5970/387/6654	21
hsa04530	Tight junction	31/989	169/7946	0.0162798	0.0406354	0.0222641	60/87/154810/23370/9181/595/2626/3059/150084/3688/58494/3725/9223/4478/79784/57644/4627/4633/5515/5520/51422/387/11346/7082/7846/10376/84790/7278/113457/112714/7454	31
hsa04911	Insulin secretion	18/989	86/7946	0.0174543	0.0432266	0.0236838	109/196883/112/1388/476/477/478/481/483/775/815/64764/2776/3710/3782/5864/6262/6513	18
hsa04614	Renin-angiotensin system	7/989	23/7946	0.0183428	0.045075	0.0246966	1636/59272/183/185/186/1511/4311	7
hsa04666	Fc gamma R-mediated phagocytosis	19/989	93/7946	0.019007	0.0463479	0.025394	207/10095/10094/81873/8853/1794/2212/9846/2934/3055/3985/4067/5604/5290/8605/5580/5880/5894/7454	19
hsa01230	Biosynthesis of amino acids	16/989	75/7946	0.020374	0.0491471	0.0269277	226/230/587/2023/2027/2805/2875/3418/5211/5213/5224/26227/113675/6472/7086/8277	16
hsa01212	Fatty acid metabolism	13/989	57/7946	0.0206201	0.0491471	0.0269277	30/10449/37/38/8310/2181/1375/1962/2194/3032/3295/6319/6342	13
hsa05134	Legionellosis	13/989	57/7946	0.0206201	0.0491471	0.0269277	664/836/929/2920/54205/3306/3310/3312/3569/3689/4792/5970/51128	13
